# Supplementary material
Source: MDPI journal article supplement (https://www.mdpi.com/2073-4352/12/9/1221)
Supplement: s1 [file s1]

Archive with 3 entries (3 files):
- CIF files/CIF Validation response form.pdf
- CIF files/Magnussonite checkcif.pdf
- CIF files/Magnussonite cif.cif
