# Supplementary material
Source: MDPI journal article supplement (https://www.mdpi.com/2073-4352/12/9/1221)
Supplement: s1 [file s1 › CIF files/Magnussonite cif.cif]

data_FCHMAG_1_0m
_publ_section_references
;
Sheldrick, G.M. (2015). Acta Cryst. A71, 3-8.
Sheldrick, G.M. (2015). Acta Cryst. C71, 3-8.
;
_audit_contact_author_address     ?
_audit_contact_author_email       'Frank.Hawthorne@UManitoba.ca'
_audit_contact_author_name        'Frank C. Hawthorne'
_audit_contact_author_phone       ?
_publ_contact_author_id_orcid     ?
_audit_creation_method
;
FinalCif V60 by Daniel Kratzert, Freiburg 2019,
https://github.com/dkratzert/FinalCif
;
_shelx_SHELXL_version_number      '2018/3'
_chemical_name_systematic         ?
_chemical_name_mineral            'magnussonite'
_chemical_name_common             ?
_chemical_formula_sum             'As96 Mn146.50 O306.10'
_chemical_formula_moiety          ?
_chemical_formula_weight          20138.91
_chemical_melting_point           ?
_space_group_crystal_system       cubic
_space_group_IT_number            230
_space_group_name_H-M_alt         'I a -3 d'
_space_group_name_Hall            '-I 4bd 2c 3'
_shelx_space_group_comment
;
The symmetry employed for this shelxl refinement is uniquely defined
by the following loop, which should always be used as a source of
symmetry information in preference to the above space-group names.
They are only intended as comments.
;

loop_
_space_group_symop_operation_xyz
'x, y, z'
'-x+1/2, -y, z+1/2'
'-x, y+1/2, -z+1/2'
'x+1/2, -y+1/2, -z'
'z, x, y'
'z+1/2, -x+1/2, -y'
'-z+1/2, -x, y+1/2'
'-z, x+1/2, -y+1/2'
'y, z, x'
'-y, z+1/2, -x+1/2'
'y+1/2, -z+1/2, -x'
'-y+1/2, -z, x+1/2'
'y+3/4, x+1/4, -z+1/4'
'-y+3/4, -x+3/4, -z+3/4'
'y+1/4, -x+1/4, z+3/4'
'-y+1/4, x+3/4, z+1/4'
'x+3/4, z+1/4, -y+1/4'
'-x+1/4, z+3/4, y+1/4'
'-x+3/4, -z+3/4, -y+3/4'
'x+1/4, -z+1/4, y+3/4'
'z+3/4, y+1/4, -x+1/4'
'z+1/4, -y+1/4, x+3/4'
'-z+1/4, y+3/4, x+1/4'
'-z+3/4, -y+3/4, -x+3/4'
'x+1/2, y+1/2, z+1/2'
'-x+1, -y+1/2, z+1'
'-x+1/2, y+1, -z+1'
'x+1, -y+1, -z+1/2'
'z+1/2, x+1/2, y+1/2'
'z+1, -x+1, -y+1/2'
'-z+1, -x+1/2, y+1'
'-z+1/2, x+1, -y+1'
'y+1/2, z+1/2, x+1/2'
'-y+1/2, z+1, -x+1'
'y+1, -z+1, -x+1/2'
'-y+1, -z+1/2, x+1'
'y+5/4, x+3/4, -z+3/4'
'-y+5/4, -x+5/4, -z+5/4'
'y+3/4, -x+3/4, z+5/4'
'-y+3/4, x+5/4, z+3/4'
'x+5/4, z+3/4, -y+3/4'
'-x+3/4, z+5/4, y+3/4'
'-x+5/4, -z+5/4, -y+5/4'
'x+3/4, -z+3/4, y+5/4'
'z+5/4, y+3/4, -x+3/4'
'z+3/4, -y+3/4, x+5/4'
'-z+3/4, y+5/4, x+3/4'
'-z+5/4, -y+5/4, -x+5/4'
'-x, -y, -z'
'x-1/2, y, -z-1/2'
'x, -y-1/2, z-1/2'
'-x-1/2, y-1/2, z'
'-z, -x, -y'
'-z-1/2, x-1/2, y'
'z-1/2, x, -y-1/2'
'z, -x-1/2, y-1/2'
'-y, -z, -x'
'y, -z-1/2, x-1/2'
'-y-1/2, z-1/2, x'
'y-1/2, z, -x-1/2'
'-y-3/4, -x-1/4, z-1/4'
'y-3/4, x-3/4, z-3/4'
'-y-1/4, x-1/4, -z-3/4'
'y-1/4, -x-3/4, -z-1/4'
'-x-3/4, -z-1/4, y-1/4'
'x-1/4, -z-3/4, -y-1/4'
'x-3/4, z-3/4, y-3/4'
'-x-1/4, z-1/4, -y-3/4'
'-z-3/4, -y-1/4, x-1/4'
'-z-1/4, y-1/4, -x-3/4'
'z-1/4, -y-3/4, -x-1/4'
'z-3/4, y-3/4, x-3/4'
'-x+1/2, -y+1/2, -z+1/2'
'x, y+1/2, -z'
'x+1/2, -y, z'
'-x, y, z+1/2'
'-z+1/2, -x+1/2, -y+1/2'
'-z, x, y+1/2'
'z, x+1/2, -y'
'z+1/2, -x, y'
'-y+1/2, -z+1/2, -x+1/2'
'y+1/2, -z, x'
'-y, z, x+1/2'
'y, z+1/2, -x'
'-y-1/4, -x+1/4, z+1/4'
'y-1/4, x-1/4, z-1/4'
'-y+1/4, x+1/4, -z-1/4'
'y+1/4, -x-1/4, -z+1/4'
'-x-1/4, -z+1/4, y+1/4'
'x+1/4, -z-1/4, -y+1/4'
'x-1/4, z-1/4, y-1/4'
'-x+1/4, z+1/4, -y-1/4'
'-z-1/4, -y+1/4, x+1/4'
'-z+1/4, y+1/4, -x-1/4'
'z+1/4, -y-1/4, -x+1/4'
'z-1/4, y-1/4, x-1/4'

_cell_length_a                    19.7144(5)
_cell_length_b                    19.7144(5)
_cell_length_c                    19.7144(5)
_cell_angle_alpha                 90
_cell_angle_beta                  90
_cell_angle_gamma                 90
_cell_volume                      7662.2(6)
_cell_formula_units_Z             1
_cell_measurement_temperature     293(2)
_cell_measurement_reflns_used     9838
_cell_measurement_theta_min       2.5305
_cell_measurement_theta_max       32.818
_exptl_crystal_description        equant
_exptl_crystal_colour             blue
_exptl_crystal_recrystallization_method ?
_exptl_crystal_density_meas       ?
_exptl_crystal_density_method     ?
_exptl_crystal_density_diffrn     4.365
_exptl_crystal_F_000              9279
_exptl_crystal_size_max           0.148
_exptl_crystal_size_mid           0.126
_exptl_crystal_size_min           0.069
_exptl_absorpt_coefficient_mu     16.203
_exptl_absorpt_correction_type    multi-scan
_exptl_absorpt_correction_T_min   0.5279
_exptl_absorpt_correction_T_max   0.7466
_exptl_absorpt_process_details
;
SADABS-2016/2 - Bruker AXS area detector scaling and absorption correction:
Krause, L., Herbst-Irmer, R., Sheldrick G.M. & Stalke D., J. Appl. Cryst. 48
(2015) 3-10
;
_exptl_absorpt_special_details    ?
_shelx_estimated_absorpt_T_min    0.198
_shelx_estimated_absorpt_T_max    0.401
_exptl_transmission_factor_min    ?
_exptl_transmission_factor_max    ?
_exptl_special_details            ?
_diffrn_ambient_temperature       293(2)
_diffrn_ambient_environment       ?
_diffrn_radiation_type            MoK\a
_diffrn_radiation_wavelength      0.71073
_diffrn_radiation_monochromator   'graphite'
_olex2_diffrn_ambient_temperature_device ?
_diffrn_radiation_probe           'X-ray'
_diffrn_source                    'Sealed X-ray tube'
_diffrn_source_type               ?
_diffrn_source_voltage            50.0
_diffrn_source_current            30.0
_diffrn_detector                  'Apex II'
_diffrn_detector_type             'CCD Detector'
_diffrn_detector_area_resol_mean  ?
_diffrn_measurement_device        'three-circle diffractometer'
_diffrn_measurement_device_type   'Bruker Apex II CCD'
_diffrn_measurement_method        '\f and \w scans'
_diffrn_measurement_specimen_support 'Lindemann glass'
_diffrn_measurement_specimen_adhesive 'Duco cement'
_diffrn_reflns_number             78155
_diffrn_reflns_av_unetI/netI      0.0101
_diffrn_reflns_av_R_equivalents   0.0446
_diffrn_reflns_theta_min          2.531
_diffrn_reflns_theta_max          33.469
_diffrn_reflns_theta_full         25.242
_diffrn_reflns_limit_h_min        -29
_diffrn_reflns_limit_h_max        30
_diffrn_reflns_limit_k_min        -30
_diffrn_reflns_limit_k_max        30
_diffrn_reflns_limit_l_min        -30
_diffrn_reflns_limit_l_max        29
_diffrn_measured_fraction_theta_max 0.979
_diffrn_measured_fraction_theta_full 0.968
_diffrn_reflns_Laue_measured_fraction_max 0.979
_diffrn_reflns_Laue_measured_fraction_full 0.968
_diffrn_reflns_point_group_measured_fraction_max 0.979
_diffrn_reflns_point_group_measured_fraction_full 0.968
_reflns_number_total              1241
_reflns_number_gt                 1093
_reflns_threshold_expression      'I > 2\s(I)'
_reflns_Friedel_coverage          0.000
_reflns_Friedel_fraction_max      .
_reflns_Friedel_fraction_full     .
_reflns_special_details
;
 Reflections were merged by SHELXL according to the crystal
 class for the calculation of statistics and refinement.
 
 _reflns_Friedel_fraction is defined as the number of unique
 Friedel pairs measured divided by the number that would be
 possible theoretically, ignoring centric projections and
 systematic absences.
;
_computing_data_collection        'Bruker BIS 2016.5.0.1/14-Jun-2016 && APEX3server_2016.5-0'
_computing_cell_refinement        'SAINT V8.40A'
_computing_data_reduction         'SAINT V8.40A'
_computing_structure_solution     'SHELXS (G. Sheldrick)'
_computing_structure_refinement   'SHELXL-2018/3 (Sheldrick, 2018)'
_computing_molecular_graphics     ?
_computing_publication_material   'Bruker SHELXTL'
_refine_special_details           ?
_refine_ls_structure_factor_coef  Fsqd
_refine_ls_matrix_type            full
_refine_ls_weighting_scheme       calc
_refine_ls_weighting_details      'w=1/[\s^2^(Fo^2^)+(0.0097P)^2^+7.5995P] where P=(Fo^2^+2Fc^2^)/3'
_atom_sites_solution_primary      direct
_atom_sites_solution_secondary    ?
_atom_sites_solution_hydrogens    .
_refine_ls_hydrogen_treatment     undef
_refine_ls_number_reflns          1241
_refine_ls_number_parameters      72
_refine_ls_number_restraints      0
_refine_ls_R_factor_all           0.0173
_refine_ls_R_factor_gt            0.0119
_refine_ls_wR_factor_ref          0.0256
_refine_ls_wR_factor_gt           0.0244
_refine_ls_goodness_of_fit_ref    1.070
_refine_ls_restrained_S_all       1.070
_refine_ls_shift/su_max           0.001
_refine_ls_shift/su_mean          0.000
_refine_diff_density_max          0.293
_refine_diff_density_min          -0.382
_refine_diff_density_rms          0.064
_refine_ls_extinction_method      'SHELXL-2018/3 (Sheldrick 2018)'
_refine_ls_extinction_coef        0.0000199(11)
_refine_ls_extinction_expression  'Fc^*^=kFc[1+0.001xFc^2^\l^3^/sin(2\q)]^-1/4^'

loop_
_atom_type_symbol
_atom_type_description
_atom_type_scat_dispersion_real
_atom_type_scat_dispersion_imag
_atom_type_scat_source
'As' 'As' 0.0499 2.0058 'International Tables Vol C Tables 4.2.6.8 and 6.1.1.4'
'Mn' 'Mn' 0.3368 0.7283 'International Tables Vol C Tables 4.2.6.8 and 6.1.1.4'
'O' 'O' 0.0106 0.0060 'International Tables Vol C Tables 4.2.6.8 and 6.1.1.4'

_geom_special_details
;
 All esds (except the esd in the dihedral angle between two l.s. planes)
 are estimated using the full covariance matrix.  The cell esds are taken
 into account individually in the estimation of esds in distances, angles
 and torsion angles; correlations between esds in cell parameters are only
 used when they are defined by crystal symmetry.  An approximate (isotropic)
 treatment of cell esds is used for estimating esds involving l.s. planes.
;

loop_
_atom_site_label
_atom_site_type_symbol
_atom_site_fract_x
_atom_site_fract_y
_atom_site_fract_z
_atom_site_U_iso_or_equiv
_atom_site_adp_type
_atom_site_occupancy
_atom_site_site_symmetry_order
_atom_site_calc_flag
_atom_site_refinement_flags_posn
_atom_site_refinement_flags_adp
_atom_site_refinement_flags_occupancy
_atom_site_disorder_assembly
_atom_site_disorder_group
Mn1 Mn 0.250000 0.375000 0.000000 0.01896(12) Uani 0.978(2) 4 d S T P . .
Mn2 Mn 0.24001(3) 0.125000 0.00999(3) 0.0248(3) Uani 0.5104(12) 2 d S T P . .
Mn3 Mn 0.375000 0.26471(2) 0.01471(2) 0.01321(5) Uani 1 2 d S T P . .
Mn4 Mn 0.11269(2) 0.36269(2) 0.125000 0.01017(5) Uani 1 2 d S T P . .
MX Mn 0.000000 0.000000 0.000000 0.064(3) Uani 0.158(4) 6 d S T P . .
As1 As 0.49807(2) 0.36712(2) 0.00876(2) 0.01011(4) Uani 1 1 d . . . . .
O1 O 0.57129(5) 0.32307(5) 0.03197(6) 0.0265(2) Uani 1 1 d . . . . .
O2 O 0.46018(4) 0.31670(4) -0.05568(4) 0.01614(16) Uani 1 1 d . . . . .
O3 O 0.44552(4) 0.33185(5) 0.07344(5) 0.01847(17) Uani 1 1 d . . . . .
CLW1 O 0.0918(4) 0.1582(4) 0.125000 0.029(2) Uani 0.264(11) 2 d S T P . .
CLW2 O 0.1175(8) 0.1325(8) 0.125000 0.070(15) Uani 0.113(10) 2 d S T P . .

loop_
_atom_site_aniso_label
_atom_site_aniso_U_11
_atom_site_aniso_U_22
_atom_site_aniso_U_33
_atom_site_aniso_U_23
_atom_site_aniso_U_13
_atom_site_aniso_U_12
Mn1 0.01585(14) 0.0252(2) 0.01585(14) 0.000 0.000 0.000
Mn2 0.0329(4) 0.00863(19) 0.0329(4) -0.00017(16) -0.0251(4) -0.00017(16)
Mn3 0.01162(10) 0.01401(7) 0.01401(7) -0.00226(8) -0.00142(6) 0.00142(6)
Mn4 0.01027(7) 0.01027(7) 0.00996(10) 0.00129(5) -0.00129(5) -0.00255(7)
MX 0.064(3) 0.064(3) 0.064(3) 0.017(2) 0.017(2) 0.017(2)
As1 0.00901(6) 0.00946(6) 0.01187(6) 0.00086(4) -0.00113(4) 0.00041(3)
O1 0.0156(4) 0.0299(5) 0.0339(5) -0.0177(4) -0.0136(4) 0.0131(4)
O2 0.0149(4) 0.0200(4) 0.0135(4) -0.0025(3) -0.0060(3) 0.0031(3)
O3 0.0168(4) 0.0225(4) 0.0161(4) -0.0034(3) 0.0065(3) -0.0038(3)
CLW1 0.027(3) 0.027(3) 0.032(4) -0.0019(19) -0.0019(19) 0.003(4)
CLW2 0.030(13) 0.030(13) 0.15(4) -0.062(16) -0.062(16) 0.034(14)

loop_
_geom_bond_atom_site_label_1
_geom_bond_atom_site_label_2
_geom_bond_distance
_geom_bond_site_symmetry_2
_geom_bond_publ_flag
Mn1 O3 2.1888(10) 17_455 ?
Mn1 O3 2.1888(10) 42_544 ?
Mn1 O3 2.1888(10) 58_565 ?
Mn1 O3 2.1888(10) 81 ?
Mn1 O1 2.7229(12) 58_565 ?
Mn1 O1 2.7229(12) 42_544 ?
Mn1 O1 2.7229(12) 17_455 ?
Mn1 O1 2.7229(12) 81 ?
Mn2 Mn2 0.5569(17) 27_544 ?
Mn2 O2 2.0204(9) 42_544 ?
Mn2 O2 2.0204(9) 12_554 ?
Mn2 O2 2.1212(9) 17_455 ?
Mn2 O2 2.1212(9) 35_445 ?
Mn2 CLW1 2.281(12) 9 ?
Mn2 CLW1 2.838(12) 34_544 ?
Mn2 CLW2 3.00(2) 9 ?
Mn2 Mn4 3.1543(3) 34_544 ?
Mn2 Mn4 3.1543(3) 9 ?
Mn2 CLW2 3.317(13) 5 ?
Mn2 CLW2 3.317(13) . ?
Mn3 O1 2.0572(9) 17_455 ?
Mn3 O1 2.0572(9) 26_554 ?
Mn3 O3 2.2417(9) . ?
Mn3 O3 2.2417(9) 42_544 ?
Mn3 O2 2.4074(9) 42_544 ?
Mn3 O2 2.4075(9) . ?
Mn3 CLW1 3.525(3) 34_544 ?
Mn3 CLW1 3.525(3) 27_544 ?
Mn3 CLW2 3.795(11) 34_544 ?
Mn3 CLW2 3.795(11) 27_544 ?
Mn4 O3 2.1712(9) 69_665 ?
Mn4 O3 2.1712(9) 81 ?
Mn4 O2 2.1804(8) 27_544 ?
Mn4 O2 2.1804(8) 39_454 ?
Mn4 O1 2.2967(9) 42_544 ?
Mn4 O1 2.2967(9) 30_455 ?
Mn4 CLW1 4.052(7) . ?
Mn4 CLW1 4.052(7) 26_454 ?
MX As1 2.62564(13) 60_556 ?
MX As1 2.62564(13) 12_554 ?
MX As1 2.62564(13) 56_565 ?
MX As1 2.62564(13) 8_545 ?
MX As1 2.62564(13) 52_655 ?
MX As1 2.62564(13) 4_455 ?
MX O3 3.7733(9) 60_556 ?
MX O3 3.7733(9) 12_554 ?
MX O3 3.7733(9) 56_565 ?
MX O3 3.7733(9) 8_545 ?
MX O3 3.7733(9) 52_655 ?
MX O3 3.7733(9) 4_455 ?
As1 O1 1.7456(9) . ?
As1 O2 1.7775(9) . ?
As1 O3 1.7838(9) . ?
As1 CLW1 3.258(3) 4 ?
As1 CLW2 3.535(11) 4 ?
As1 CLW2 3.6392(7) 11 ?
As1 CLW1 3.731(3) 11 ?
As1 CLW2 3.757(14) 6 ?
As1 CLW1 4.214(8) 6 ?
As1 CLW1 5.201(9) 27_544 ?
O1 CLW1 3.143(2) 4 ?
O1 CLW1 3.152(2) 11 ?
O1 CLW2 3.342(9) 4 ?
O1 CLW2 3.344(9) 11 ?
O1 CLW2 3.61(2) 6 ?
O1 CLW1 4.242(11) 6 ?
O2 CLW1 2.974(9) 4 ?
O2 CLW2 3.533(19) 4 ?
O2 CLW1 3.561(10) 27_544 ?
O2 CLW2 3.788(9) 11 ?
O2 CLW2 3.813(12) 6 ?
O3 CLW1 4.864(5) 4 ?
CLW1 CLW2 0.72(2) . ?
CLW1 CLW2 1.05(2) 9 ?
CLW1 CLW2 1.05(2) 5 ?
CLW1 CLW1 1.60(2) 9 ?
CLW1 CLW1 1.60(2) 5 ?
CLW2 CLW2 0.36(4) 9 ?
CLW2 CLW2 0.36(4) 5 ?

loop_
_geom_angle_atom_site_label_1
_geom_angle_atom_site_label_2
_geom_angle_atom_site_label_3
_geom_angle
_geom_angle_site_symmetry_1
_geom_angle_site_symmetry_3
_geom_angle_publ_flag
O3 Mn1 O3 124.65(5) 17_455 42_544 ?
O3 Mn1 O3 102.458(19) 17_455 58_565 ?
O3 Mn1 O3 102.458(19) 42_544 58_565 ?
O3 Mn1 O3 102.458(19) 17_455 81 ?
O3 Mn1 O3 102.458(19) 42_544 81 ?
O3 Mn1 O3 124.65(5) 58_565 81 ?
O3 Mn1 O1 162.35(3) 17_455 58_565 ?
O3 Mn1 O1 70.90(3) 42_544 58_565 ?
O3 Mn1 O1 63.28(3) 58_565 58_565 ?
O3 Mn1 O1 79.86(3) 81 58_565 ?
O3 Mn1 O1 79.86(3) 17_455 42_544 ?
O3 Mn1 O1 63.28(3) 42_544 42_544 ?
O3 Mn1 O1 162.35(3) 58_565 42_544 ?
O3 Mn1 O1 70.90(3) 81 42_544 ?
O1 Mn1 O1 116.98(2) 58_565 42_544 ?
O3 Mn1 O1 63.28(3) 17_455 17_455 ?
O3 Mn1 O1 79.86(3) 42_544 17_455 ?
O3 Mn1 O1 70.90(3) 58_565 17_455 ?
O3 Mn1 O1 162.35(3) 81 17_455 ?
O1 Mn1 O1 116.98(2) 58_565 17_455 ?
O1 Mn1 O1 95.31(4) 42_544 17_455 ?
O3 Mn1 O1 70.90(3) 17_455 81 ?
O3 Mn1 O1 162.35(3) 42_544 81 ?
O3 Mn1 O1 79.86(3) 58_565 81 ?
O3 Mn1 O1 63.28(3) 81 81 ?
O1 Mn1 O1 95.31(4) 58_565 81 ?
O1 Mn1 O1 116.98(2) 42_544 81 ?
O1 Mn1 O1 116.98(2) 17_455 81 ?
Mn2 Mn2 O2 92.73(3) 27_544 42_544 ?
Mn2 Mn2 O2 92.73(3) 27_544 12_554 ?
O2 Mn2 O2 174.54(7) 42_544 12_554 ?
Mn2 Mn2 O2 72.07(3) 27_544 17_455 ?
O2 Mn2 O2 95.35(5) 42_544 17_455 ?
O2 Mn2 O2 86.34(5) 12_554 17_455 ?
Mn2 Mn2 O2 72.07(3) 27_544 35_445 ?
O2 Mn2 O2 86.34(5) 42_544 35_445 ?
O2 Mn2 O2 95.35(5) 12_554 35_445 ?
O2 Mn2 O2 144.13(7) 17_455 35_445 ?
Mn2 Mn2 CLW1 180.0(2) 27_544 9 ?
O2 Mn2 CLW1 87.27(3) 42_544 9 ?
O2 Mn2 CLW1 87.27(3) 12_554 9 ?
O2 Mn2 CLW1 107.93(3) 17_455 9 ?
O2 Mn2 CLW1 107.93(3) 35_445 9 ?
Mn2 Mn2 CLW1 0.00(16) 27_544 34_544 ?
O2 Mn2 CLW1 92.73(3) 42_544 34_544 ?
O2 Mn2 CLW1 92.73(3) 12_554 34_544 ?
O2 Mn2 CLW1 72.07(3) 17_455 34_544 ?
O2 Mn2 CLW1 72.07(3) 35_445 34_544 ?
CLW1 Mn2 CLW1 180.0(3) 9 34_544 ?
Mn2 Mn2 CLW2 180.00(19) 27_544 9 ?
O2 Mn2 CLW2 87.27(3) 42_544 9 ?
O2 Mn2 CLW2 87.27(3) 12_554 9 ?
O2 Mn2 CLW2 107.93(3) 17_455 9 ?
O2 Mn2 CLW2 107.93(3) 35_445 9 ?
CLW1 Mn2 CLW2 0.0(6) 9 9 ?
CLW1 Mn2 CLW2 180.0(2) 34_544 9 ?
Mn2 Mn2 Mn4 84.935(16) 27_544 34_544 ?
O2 Mn2 Mn4 137.41(2) 42_544 34_544 ?
O2 Mn2 Mn4 43.29(2) 12_554 34_544 ?
O2 Mn2 Mn4 43.58(2) 17_455 34_544 ?
O2 Mn2 Mn4 132.07(3) 35_445 34_544 ?
CLW1 Mn2 Mn4 95.065(15) 9 34_544 ?
CLW1 Mn2 Mn4 84.935(15) 34_544 34_544 ?
CLW2 Mn2 Mn4 95.065(15) 9 34_544 ?
Mn2 Mn2 Mn4 84.935(15) 27_544 9 ?
O2 Mn2 Mn4 43.29(2) 42_544 9 ?
O2 Mn2 Mn4 137.41(2) 12_554 9 ?
O2 Mn2 Mn4 132.07(3) 17_455 9 ?
O2 Mn2 Mn4 43.58(2) 35_445 9 ?
CLW1 Mn2 Mn4 95.065(15) 9 9 ?
CLW1 Mn2 Mn4 84.935(15) 34_544 9 ?
CLW2 Mn2 Mn4 95.065(15) 9 9 ?
Mn4 Mn2 Mn4 169.87(3) 34_544 9 ?
Mn2 Mn2 CLW2 176.9(3) 27_544 5 ?
O2 Mn2 CLW2 87.68(6) 42_544 5 ?
O2 Mn2 CLW2 86.87(5) 12_554 5 ?
O2 Mn2 CLW2 111.0(3) 17_455 5 ?
O2 Mn2 CLW2 104.9(3) 35_445 5 ?
CLW1 Mn2 CLW2 3.1(3) 9 5 ?
CLW1 Mn2 CLW2 176.9(3) 34_544 5 ?
CLW2 Mn2 CLW2 3.1(3) 9 5 ?
Mn4 Mn2 CLW2 96.87(19) 34_544 5 ?
Mn4 Mn2 CLW2 93.2(2) 9 5 ?
Mn2 Mn2 CLW2 176.9(3) 27_544 . ?
O2 Mn2 CLW2 86.87(5) 42_544 . ?
O2 Mn2 CLW2 87.68(6) 12_554 . ?
O2 Mn2 CLW2 104.9(3) 17_455 . ?
O2 Mn2 CLW2 111.0(3) 35_445 . ?
CLW1 Mn2 CLW2 3.1(3) 9 . ?
CLW1 Mn2 CLW2 176.9(3) 34_544 . ?
CLW2 Mn2 CLW2 3.1(3) 9 . ?
Mn4 Mn2 CLW2 93.2(2) 34_544 . ?
Mn4 Mn2 CLW2 96.87(19) 9 . ?
CLW2 Mn2 CLW2 6.3(7) 5 . ?
O1 Mn3 O1 122.89(7) 17_455 26_554 ?
O1 Mn3 O3 131.00(4) 17_455 . ?
O1 Mn3 O3 95.29(4) 26_554 . ?
O1 Mn3 O3 95.29(4) 17_455 42_544 ?
O1 Mn3 O3 131.00(4) 26_554 42_544 ?
O3 Mn3 O3 76.99(4) . 42_544 ?
O1 Mn3 O2 95.41(3) 17_455 42_544 ?
O1 Mn3 O2 78.68(3) 26_554 42_544 ?
O3 Mn3 O2 123.58(3) . 42_544 ?
O3 Mn3 O2 67.27(3) 42_544 42_544 ?
O1 Mn3 O2 78.68(3) 17_455 . ?
O1 Mn3 O2 95.41(3) 26_554 . ?
O3 Mn3 O2 67.28(3) . . ?
O3 Mn3 O2 123.59(3) 42_544 . ?
O2 Mn3 O2 167.76(4) 42_544 . ?
O1 Mn3 Mn1 162.45(3) 17_455 77 ?
O1 Mn3 Mn1 55.43(3) 26_554 77 ?
O3 Mn3 Mn1 41.26(3) . 77 ?
O3 Mn3 Mn1 96.87(3) 42_544 77 ?
O2 Mn3 Mn1 100.94(2) 42_544 77 ?
O2 Mn3 Mn1 84.046(19) . 77 ?
O1 Mn3 Mn1 55.43(3) 17_455 . ?
O1 Mn3 Mn1 162.45(3) 26_554 . ?
O3 Mn3 Mn1 96.87(3) . . ?
O3 Mn3 Mn1 41.26(3) 42_544 . ?
O2 Mn3 Mn1 84.045(19) 42_544 . ?
O2 Mn3 Mn1 100.94(2) . . ?
Mn1 Mn3 Mn1 132.365(8) 77 . ?
O1 Mn3 CLW1 62.12(4) 17_455 34_544 ?
O1 Mn3 CLW1 62.40(4) 26_554 34_544 ?
O3 Mn3 CLW1 152.16(14) . 34_544 ?
O3 Mn3 CLW1 129.80(17) 42_544 34_544 ?
O2 Mn3 CLW1 70.95(18) 42_544 34_544 ?
O2 Mn3 CLW1 96.83(18) . 34_544 ?
Mn1 Mn3 CLW1 117.56(4) 77 34_544 ?
Mn1 Mn3 CLW1 108.90(8) . 34_544 ?
O1 Mn3 CLW1 62.40(4) 17_455 27_544 ?
O1 Mn3 CLW1 62.12(4) 26_554 27_544 ?
O3 Mn3 CLW1 129.80(17) . 27_544 ?
O3 Mn3 CLW1 152.16(14) 42_544 27_544 ?
O2 Mn3 CLW1 96.83(18) 42_544 27_544 ?
O2 Mn3 CLW1 70.95(18) . 27_544 ?
Mn1 Mn3 CLW1 108.90(8) 77 27_544 ?
Mn1 Mn3 CLW1 117.56(4) . 27_544 ?
CLW1 Mn3 CLW1 26.3(4) 34_544 27_544 ?
O1 Mn3 CLW2 61.45(3) 17_455 34_544 ?
O1 Mn3 CLW2 61.51(4) 26_554 34_544 ?
O3 Mn3 CLW2 143.9(3) . 34_544 ?
O3 Mn3 CLW2 139.1(3) 42_544 34_544 ?
O2 Mn3 CLW2 81.2(3) 42_544 34_544 ?
O2 Mn3 CLW2 86.6(3) . 34_544 ?
Mn1 Mn3 CLW2 114.71(10) 77 34_544 ?
Mn1 Mn3 CLW2 112.88(11) . 34_544 ?
CLW1 Mn3 CLW2 10.4(3) 34_544 34_544 ?
CLW1 Mn3 CLW2 15.9(4) 27_544 34_544 ?
O1 Mn3 CLW2 61.51(4) 17_455 27_544 ?
O1 Mn3 CLW2 61.45(3) 26_554 27_544 ?
O3 Mn3 CLW2 139.1(3) . 27_544 ?
O3 Mn3 CLW2 143.9(3) 42_544 27_544 ?
O2 Mn3 CLW2 86.6(3) 42_544 27_544 ?
O2 Mn3 CLW2 81.2(3) . 27_544 ?
Mn1 Mn3 CLW2 112.88(11) 77 27_544 ?
Mn1 Mn3 CLW2 114.71(10) . 27_544 ?
CLW1 Mn3 CLW2 15.9(4) 34_544 27_544 ?
CLW1 Mn3 CLW2 10.4(3) 27_544 27_544 ?
CLW2 Mn3 CLW2 5.5(6) 34_544 27_544 ?
O3 Mn4 O3 79.98(5) 69_665 81 ?
O3 Mn4 O2 173.19(3) 69_665 27_544 ?
O3 Mn4 O2 99.88(3) 81 27_544 ?
O3 Mn4 O2 99.88(3) 69_665 39_454 ?
O3 Mn4 O2 173.20(3) 81 39_454 ?
O2 Mn4 O2 81.08(5) 27_544 39_454 ?
O3 Mn4 O1 107.80(4) 69_665 42_544 ?
O3 Mn4 O1 80.28(4) 81 42_544 ?
O2 Mn4 O1 78.80(3) 27_544 42_544 ?
O2 Mn4 O1 93.35(4) 39_454 42_544 ?
O3 Mn4 O1 80.28(4) 69_665 30_455 ?
O3 Mn4 O1 107.80(4) 81 30_455 ?
O2 Mn4 O1 93.35(4) 27_544 30_455 ?
O2 Mn4 O1 78.80(3) 39_454 30_455 ?
O1 Mn4 O1 169.76(6) 42_544 30_455 ?
O3 Mn4 Mn2 139.32(2) 69_665 5 ?
O3 Mn4 Mn2 140.17(2) 81 5 ?
O2 Mn4 Mn2 42.11(2) 27_544 5 ?
O2 Mn4 Mn2 39.45(2) 39_454 5 ?
O1 Mn4 Mn2 80.36(3) 42_544 5 ?
O1 Mn4 Mn2 89.41(3) 30_455 5 ?
O3 Mn4 Mn2 140.17(2) 69_665 31_454 ?
O3 Mn4 Mn2 139.32(2) 81 31_454 ?
O2 Mn4 Mn2 39.45(2) 27_544 31_454 ?
O2 Mn4 Mn2 42.11(2) 39_454 31_454 ?
O1 Mn4 Mn2 89.41(3) 42_544 31_454 ?
O1 Mn4 Mn2 80.36(3) 30_455 31_454 ?
Mn2 Mn4 Mn2 10.13(3) 5 31_454 ?
O3 Mn4 Mn1 32.86(3) 69_665 81 ?
O3 Mn4 Mn1 88.22(3) 81 81 ?
O2 Mn4 Mn1 140.49(2) 27_544 81 ?
O2 Mn4 Mn1 95.31(2) 39_454 81 ?
O1 Mn4 Mn1 140.64(2) 42_544 81 ?
O1 Mn4 Mn1 47.80(3) 30_455 81 ?
Mn2 Mn4 Mn1 127.461(9) 5 81 ?
Mn2 Mn4 Mn1 121.625(10) 31_454 81 ?
O3 Mn4 Mn1 88.22(3) 69_665 . ?
O3 Mn4 Mn1 32.86(3) 81 . ?
O2 Mn4 Mn1 95.31(2) 27_544 . ?
O2 Mn4 Mn1 140.49(2) 39_454 . ?
O1 Mn4 Mn1 47.80(3) 42_544 . ?
O1 Mn4 Mn1 140.64(2) 30_455 . ?
Mn2 Mn4 Mn1 121.625(10) 5 . ?
Mn2 Mn4 Mn1 127.461(9) 31_454 . ?
Mn1 Mn4 Mn1 110.707(6) 81 . ?
O3 Mn4 CLW1 124.05(9) 69_665 . ?
O3 Mn4 CLW1 128.92(8) 81 . ?
O2 Mn4 CLW1 61.27(9) 27_544 . ?
O2 Mn4 CLW1 45.75(7) 39_454 . ?
O1 Mn4 CLW1 50.82(11) 42_544 . ?
O1 Mn4 CLW1 119.56(11) 30_455 . ?
Mn2 Mn4 CLW1 34.10(13) 5 . ?
Mn2 Mn4 CLW1 44.23(13) 31_454 . ?
Mn1 Mn4 CLW1 137.796(3) 81 . ?
Mn1 Mn4 CLW1 98.10(10) . . ?
O3 Mn4 CLW1 128.92(8) 69_665 26_454 ?
O3 Mn4 CLW1 124.05(9) 81 26_454 ?
O2 Mn4 CLW1 45.75(7) 27_544 26_454 ?
O2 Mn4 CLW1 61.27(9) 39_454 26_454 ?
O1 Mn4 CLW1 119.56(11) 42_544 26_454 ?
O1 Mn4 CLW1 50.82(11) 30_455 26_454 ?
Mn2 Mn4 CLW1 44.23(13) 5 26_454 ?
Mn2 Mn4 CLW1 34.10(13) 31_454 26_454 ?
Mn1 Mn4 CLW1 98.10(10) 81 26_454 ?
Mn1 Mn4 CLW1 137.796(3) . 26_454 ?
CLW1 Mn4 CLW1 78.3(3) . 26_454 ?
As1 MX As1 180.0 60_556 12_554 ?
As1 MX As1 94.541(3) 60_556 56_565 ?
As1 MX As1 85.459(3) 12_554 56_565 ?
As1 MX As1 85.459(3) 60_556 8_545 ?
As1 MX As1 94.541(3) 12_554 8_545 ?
As1 MX As1 180.0 56_565 8_545 ?
As1 MX As1 94.541(3) 60_556 52_655 ?
As1 MX As1 85.459(3) 12_554 52_655 ?
As1 MX As1 94.541(3) 56_565 52_655 ?
As1 MX As1 85.459(3) 8_545 52_655 ?
As1 MX As1 85.459(3) 60_556 4_455 ?
As1 MX As1 94.541(3) 12_554 4_455 ?
As1 MX As1 85.459(3) 56_565 4_455 ?
As1 MX As1 94.541(3) 8_545 4_455 ?
As1 MX As1 180.0 52_655 4_455 ?
As1 MX O3 25.056(13) 60_556 60_556 ?
As1 MX O3 154.944(13) 12_554 60_556 ?
As1 MX O3 109.643(14) 56_565 60_556 ?
As1 MX O3 70.357(14) 8_545 60_556 ?
As1 MX O3 112.140(14) 52_655 60_556 ?
As1 MX O3 67.860(14) 4_455 60_556 ?
As1 MX O3 154.944(13) 60_556 12_554 ?
As1 MX O3 25.056(13) 12_554 12_554 ?
As1 MX O3 70.357(14) 56_565 12_554 ?
As1 MX O3 109.643(14) 8_545 12_554 ?
As1 MX O3 67.860(14) 52_655 12_554 ?
As1 MX O3 112.140(14) 4_455 12_554 ?
O3 MX O3 180.000(14) 60_556 12_554 ?
As1 MX O3 112.140(14) 60_556 56_565 ?
As1 MX O3 67.860(14) 12_554 56_565 ?
As1 MX O3 25.056(13) 56_565 56_565 ?
As1 MX O3 154.944(13) 8_545 56_565 ?
As1 MX O3 109.643(14) 52_655 56_565 ?
As1 MX O3 70.357(14) 4_455 56_565 ?
O3 MX O3 118.548(5) 60_556 56_565 ?
O3 MX O3 61.452(5) 12_554 56_565 ?
As1 MX O3 67.860(14) 60_556 8_545 ?
As1 MX O3 112.140(14) 12_554 8_545 ?
As1 MX O3 154.944(13) 56_565 8_545 ?
As1 MX O3 25.056(13) 8_545 8_545 ?
As1 MX O3 70.357(14) 52_655 8_545 ?
As1 MX O3 109.643(14) 4_455 8_545 ?
O3 MX O3 61.452(5) 60_556 8_545 ?
O3 MX O3 118.548(5) 12_554 8_545 ?
O3 MX O3 180.00(4) 56_565 8_545 ?
As1 MX O3 109.643(14) 60_556 52_655 ?
As1 MX O3 70.357(14) 12_554 52_655 ?
As1 MX O3 112.140(14) 56_565 52_655 ?
As1 MX O3 67.860(14) 8_545 52_655 ?
As1 MX O3 25.056(13) 52_655 52_655 ?
As1 MX O3 154.944(13) 4_455 52_655 ?
O3 MX O3 118.548(5) 60_556 52_655 ?
O3 MX O3 61.452(5) 12_554 52_655 ?
O3 MX O3 118.548(5) 56_565 52_655 ?
O3 MX O3 61.452(5) 8_545 52_655 ?
As1 MX O3 70.357(14) 60_556 4_455 ?
As1 MX O3 109.643(14) 12_554 4_455 ?
As1 MX O3 67.860(14) 56_565 4_455 ?
As1 MX O3 112.140(14) 8_545 4_455 ?
As1 MX O3 154.944(13) 52_655 4_455 ?
As1 MX O3 25.056(13) 4_455 4_455 ?
O3 MX O3 61.452(5) 60_556 4_455 ?
O3 MX O3 118.548(5) 12_554 4_455 ?
O3 MX O3 61.452(5) 56_565 4_455 ?
O3 MX O3 118.548(5) 8_545 4_455 ?
O3 MX O3 180.00(4) 52_655 4_455 ?
O1 As1 O2 104.87(4) . . ?
O1 As1 O3 95.68(5) . . ?
O2 As1 O3 92.80(4) . . ?
O1 As1 MX 120.10(4) . 4 ?
O2 As1 MX 121.14(3) . 4 ?
O3 As1 MX 116.38(3) . 4 ?
O1 As1 Mn1 56.81(4) . 77 ?
O2 As1 Mn1 96.40(3) . 77 ?
O3 As1 Mn1 39.35(3) . 77 ?
MX As1 Mn1 138.959(4) 4 77 ?
O1 As1 CLW1 70.55(5) . 4 ?
O2 As1 CLW1 64.80(19) . 4 ?
O3 As1 CLW1 148.00(18) . 4 ?
MX As1 CLW1 95.25(16) 4 4 ?
Mn1 As1 CLW1 117.04(8) 77 4 ?
O1 As1 CLW2 69.26(5) . 4 ?
O2 As1 CLW2 75.4(3) . 4 ?
O3 As1 CLW2 157.0(2) . 4 ?
MX As1 CLW2 86.5(3) 4 4 ?
Mn1 As1 CLW2 121.27(11) 77 4 ?
CLW1 As1 CLW2 11.2(3) 4 4 ?
O1 As1 CLW2 66.3(3) . 11 ?
O2 As1 CLW2 80.9(3) . 11 ?
O3 As1 CLW2 158.19(13) . 11 ?
MX As1 CLW2 84.367(15) 4 11 ?
Mn1 As1 CLW2 120.2(2) 77 11 ?
CLW1 As1 CLW2 16.3(4) 4 11 ?
CLW2 As1 CLW2 5.6(6) 4 11 ?
O1 As1 CLW1 57.33(15) . 11 ?
O2 As1 CLW1 89.95(15) . 11 ?
O3 As1 CLW1 152.54(12) . 11 ?
MX As1 CLW1 84.906(11) 4 11 ?
Mn1 As1 CLW1 113.20(12) 77 11 ?
CLW1 As1 CLW1 25.4(3) 4 11 ?
CLW2 As1 CLW1 16.3(3) 4 11 ?
CLW2 As1 CLW1 11.1(3) 11 11 ?
O1 As1 CLW2 71.6(3) . 6 ?
O2 As1 CLW2 78.19(3) . 6 ?
O3 As1 CLW2 161.5(3) . 6 ?
MX As1 CLW2 82.0(2) 4 6 ?
Mn1 As1 CLW2 124.9(3) 77 6 ?
CLW1 As1 CLW2 15.1(3) 4 6 ?
CLW2 As1 CLW2 4.5(5) 4 6 ?
CLW2 As1 CLW2 5.3(6) 11 6 ?
CLW1 As1 CLW2 16.1(3) 11 6 ?
O1 As1 CLW1 79.01(12) . 6 ?
O2 As1 CLW1 78.39(3) . 6 ?
O3 As1 CLW1 168.02(9) . 6 ?
MX As1 CLW1 75.41(10) 4 6 ?
Mn1 As1 CLW1 132.83(12) 77 6 ?
CLW1 As1 CLW1 20.0(3) 4 6 ?
CLW2 As1 CLW1 11.9(2) 4 6 ?
CLW2 As1 CLW1 12.8(3) 11 6 ?
CLW1 As1 CLW1 22.2(3) 11 6 ?
CLW2 As1 CLW1 7.9(3) 6 6 ?
O1 As1 CLW1 91.18(4) . 27_544 ?
O2 As1 CLW1 18.52(4) . 27_544 ?
O3 As1 CLW1 81.72(8) . 27_544 ?
MX As1 CLW1 139.61(2) 4 27_544 ?
Mn1 As1 CLW1 78.41(4) 77 27_544 ?
CLW1 As1 CLW1 70.2(3) 4 27_544 ?
CLW2 As1 CLW1 81.4(4) 4 27_544 ?
CLW2 As1 CLW1 86.3(2) 11 27_544 ?
CLW1 As1 CLW1 92.97(3) 11 27_544 ?
CLW2 As1 CLW1 85.12(9) 6 27_544 ?
CLW1 As1 CLW1 87.62(4) 6 27_544 ?
As1 O1 Mn3 143.21(5) . 26_554 ?
As1 O1 Mn4 115.37(5) . 36_554 ?
Mn3 O1 Mn4 101.41(4) 26_554 36_554 ?
As1 O1 Mn1 90.74(4) . 77 ?
Mn3 O1 Mn1 86.10(4) 26_554 77 ?
Mn4 O1 Mn1 93.53(4) 36_554 77 ?
As1 O1 CLW1 77.87(7) . 4 ?
Mn3 O1 CLW1 82.52(7) 26_554 4 ?
Mn4 O1 CLW1 123.9(2) 36_554 4 ?
Mn1 O1 CLW1 142.4(2) 77 4 ?
As1 O1 CLW1 94.88(18) . 11 ?
Mn3 O1 CLW1 82.27(7) 26_554 11 ?
Mn4 O1 CLW1 94.79(19) 36_554 11 ?
Mn1 O1 CLW1 166.83(6) 77 11 ?
CLW1 O1 CLW1 29.5(4) 4 11 ?
As1 O1 CLW2 81.51(12) . 4 ?
Mn3 O1 CLW2 85.82(11) 26_554 4 ?
Mn4 O1 CLW2 111.7(4) 36_554 4 ?
Mn1 O1 CLW2 154.5(4) 77 4 ?
CLW1 O1 CLW2 12.2(3) 4 4 ?
CLW1 O1 CLW2 18.2(5) 11 4 ?
As1 O1 CLW2 85.1(3) . 11 ?
Mn3 O1 CLW2 85.76(11) 26_554 11 ?
Mn4 O1 CLW2 105.6(3) 36_554 11 ?
Mn1 O1 CLW2 160.3(3) 77 11 ?
CLW1 O1 CLW2 18.2(5) 4 11 ?
CLW1 O1 CLW2 12.2(3) 11 11 ?
CLW2 O1 CLW2 6.2(7) 4 11 ?
As1 O1 CLW2 81.11(16) . 6 ?
Mn3 O1 CLW2 88.49(19) 26_554 6 ?
Mn4 O1 CLW2 108.17(5) 36_554 6 ?
Mn1 O1 CLW2 158.28(6) 77 6 ?
CLW1 O1 CLW2 16.0(3) 4 6 ?
CLW1 O1 CLW2 16.1(3) 11 6 ?
CLW2 O1 CLW2 4.1(5) 4 6 ?
CLW2 O1 CLW2 4.1(5) 11 6 ?
As1 O1 MX 36.57(2) . 4 ?
Mn3 O1 MX 158.74(5) 26_554 4 ?
Mn4 O1 MX 85.16(3) 36_554 4 ?
Mn1 O1 MX 113.90(3) 77 4 ?
CLW1 O1 MX 77.13(8) 4 4 ?
CLW1 O1 MX 77.02(8) 11 4 ?
CLW2 O1 MX 73.01(12) 4 4 ?
CLW2 O1 MX 72.99(11) 11 4 ?
CLW2 O1 MX 70.27(19) 6 4 ?
As1 O1 CLW1 77.17(7) . 6 ?
Mn3 O1 CLW1 93.34(8) 26_554 6 ?
Mn4 O1 CLW1 107.13(4) 36_554 6 ?
Mn1 O1 CLW1 158.99(3) 77 6 ?
CLW1 O1 CLW1 18.4(2) 4 6 ?
CLW1 O1 CLW1 18.5(2) 11 6 ?
CLW2 O1 CLW1 8.1(3) 4 6 ?
CLW2 O1 CLW1 8.2(3) 11 6 ?
CLW2 O1 CLW1 4.85(17) 6 6 ?
MX O1 CLW1 65.42(7) 4 6 ?
As1 O2 Mn2 126.06(5) . 6 ?
As1 O2 Mn2 137.95(5) . 32_544 ?
Mn2 O2 Mn2 15.20(5) 6 32_544 ?
As1 O2 Mn4 119.49(4) . 27_544 ?
Mn2 O2 Mn4 97.26(3) 6 27_544 ?
Mn2 O2 Mn4 94.31(3) 32_544 27_544 ?
As1 O2 Mn3 96.85(4) . . ?
Mn2 O2 Mn3 119.56(5) 6 . ?
Mn2 O2 Mn3 105.15(4) 32_544 . ?
Mn4 O2 Mn3 94.51(3) 27_544 . ?
As1 O2 CLW1 82.46(14) . 4 ?
Mn2 O2 CLW1 50.00(16) 6 4 ?
Mn2 O2 CLW1 65.20(16) 32_544 4 ?
Mn4 O2 CLW1 102.57(3) 27_544 4 ?
Mn3 O2 CLW1 160.78(8) . 4 ?
As1 O2 CLW2 75.48(19) . 4 ?
Mn2 O2 CLW2 57.9(2) 6 4 ?
Mn2 O2 CLW2 73.1(2) 32_544 4 ?
Mn4 O2 CLW2 102.59(3) 27_544 4 ?
Mn3 O2 CLW2 162.88(3) . 4 ?
CLW1 O2 CLW2 7.9(2) 4 4 ?
As1 O2 CLW1 152.36(4) . 27_544 ?
Mn2 O2 CLW1 52.75(11) 6 27_544 ?
Mn2 O2 CLW1 37.54(11) 32_544 27_544 ?
Mn4 O2 CLW1 86.26(3) 27_544 27_544 ?
Mn3 O2 CLW1 69.33(10) . 27_544 ?
CLW1 O2 CLW1 102.7(3) 4 27_544 ?
CLW2 O2 CLW1 110.6(3) 4 27_544 ?
As1 O2 CLW2 71.5(3) . 11 ?
Mn2 O2 CLW2 60.95(14) 6 11 ?
Mn2 O2 CLW2 76.13(13) 32_544 11 ?
Mn4 O2 CLW2 105.3(3) 27_544 11 ?
Mn3 O2 CLW2 160.1(3) . 11 ?
CLW1 O2 CLW2 11.2(3) 4 11 ?
CLW2 O2 CLW2 4.1(5) 4 11 ?
CLW1 O2 CLW2 113.63(12) 27_544 11 ?
As1 O2 CLW2 74.67(9) . 6 ?
Mn2 O2 CLW2 60.36(8) 6 6 ?
Mn2 O2 CLW2 75.54(7) 32_544 6 ?
Mn4 O2 CLW2 99.8(3) 27_544 6 ?
Mn3 O2 CLW2 165.6(3) . 6 ?
CLW1 O2 CLW2 10.7(2) 4 6 ?
CLW2 O2 CLW2 3.6(4) 4 6 ?
CLW1 O2 CLW2 113.04(10) 27_544 6 ?
CLW2 O2 CLW2 5.5(6) 11 6 ?
As1 O2 MX 35.635(19) . 4 ?
Mn2 O2 MX 127.73(4) 6 4 ?
Mn2 O2 MX 142.62(4) 32_544 4 ?
Mn4 O2 MX 85.57(3) 27_544 4 ?
Mn3 O2 MX 112.13(3) . 4 ?
CLW1 O2 MX 78.31(15) 4 4 ?
CLW2 O2 MX 70.5(2) 4 4 ?
CLW1 O2 MX 171.79(3) 27_544 4 ?
CLW2 O2 MX 67.96(7) 11 4 ?
CLW2 O2 MX 67.71(10) 6 4 ?
As1 O2 Mn1 56.50(2) . 77 ?
Mn2 O2 Mn1 109.60(3) 6 77 ?
Mn2 O2 Mn1 107.10(3) 32_544 77 ?
Mn4 O2 Mn1 148.24(4) 27_544 77 ?
Mn3 O2 Mn1 57.814(17) . 77 ?
CLW1 O2 Mn1 107.58(4) 4 77 ?
CLW2 O2 Mn1 105.89(5) 4 77 ?
CLW1 O2 Mn1 96.51(4) 27_544 77 ?
CLW2 O2 Mn1 102.5(3) 11 77 ?
CLW2 O2 Mn1 107.9(3) 6 77 ?
MX O2 Mn1 90.865(18) 4 77 ?
As1 O3 Mn4 126.17(5) . 77 ?
As1 O3 Mn1 109.54(4) . 77 ?
Mn4 O3 Mn1 114.59(4) 77 77 ?
As1 O3 Mn3 102.78(4) . . ?
Mn4 O3 Mn3 101.52(4) 77 . ?
Mn1 O3 Mn3 96.25(4) 77 . ?
As1 O3 MX 38.57(2) . 4 ?
Mn4 O3 MX 87.85(3) 77 4 ?
Mn1 O3 MX 133.33(3) 77 4 ?
Mn3 O3 MX 119.81(3) . 4 ?
As1 O3 CLW1 20.79(11) . 4 ?
Mn4 O3 CLW1 145.67(8) 77 4 ?
Mn1 O3 CLW1 96.45(3) 77 4 ?
Mn3 O3 CLW1 88.63(12) . 4 ?
MX O3 CLW1 59.16(10) 4 4 ?
CLW2 CLW1 CLW2 10.0(9) . 9 ?
CLW2 CLW1 CLW2 10.0(9) . 5 ?
CLW2 CLW1 CLW2 20.0(19) 9 5 ?
CLW2 CLW1 CLW1 30.000(4) . 9 ?
CLW2 CLW1 CLW1 20.0(9) 9 9 ?
CLW2 CLW1 CLW1 40.0(9) 5 9 ?
CLW2 CLW1 CLW1 30.000(5) . 5 ?
CLW2 CLW1 CLW1 40.0(9) 9 5 ?
CLW2 CLW1 CLW1 20.0(9) 5 5 ?
CLW1 CLW1 CLW1 60.0 9 5 ?
CLW2 CLW1 Mn2 180.0(17) . 5 ?
CLW2 CLW1 Mn2 170.0(9) 9 5 ?
CLW2 CLW1 Mn2 170.0(9) 5 5 ?
CLW1 CLW1 Mn2 150.0 9 5 ?
CLW1 CLW1 Mn2 150.0 5 5 ?
CLW2 CLW1 Mn2 180.0(17) . 31_454 ?
CLW2 CLW1 Mn2 170.0(9) 9 31_454 ?
CLW2 CLW1 Mn2 170.0(9) 5 31_454 ?
CLW1 CLW1 Mn2 150.0 9 31_454 ?
CLW1 CLW1 Mn2 150.0 5 31_454 ?
Mn2 CLW1 Mn2 0.00(6) 5 31_454 ?
CLW2 CLW1 O2 137.27(15) . 4_455 ?
CLW2 CLW1 O2 135.1(4) 9 4_455 ?
CLW2 CLW1 O2 137.60(18) 5 4_455 ?
CLW1 CLW1 O2 126.34(12) 9 4_455 ?
CLW1 CLW1 O2 132.81(12) 5 4_455 ?
Mn2 CLW1 O2 42.73(16) 5 4_455 ?
Mn2 CLW1 O2 42.73(16) 31_454 4_455 ?
CLW2 CLW1 O2 137.27(16) . 39_454 ?
CLW2 CLW1 O2 137.60(18) 9 39_454 ?
CLW2 CLW1 O2 135.1(4) 5 39_454 ?
CLW1 CLW1 O2 132.81(11) 9 39_454 ?
CLW1 CLW1 O2 126.34(12) 5 39_454 ?
Mn2 CLW1 O2 42.73(16) 5 39_454 ?
Mn2 CLW1 O2 42.73(16) 31_454 39_454 ?
O2 CLW1 O2 85.5(3) 4_455 39_454 ?
CLW2 CLW1 O1 100.0(2) . 39_454 ?
CLW2 CLW1 O1 108.1(7) 9 39_454 ?
CLW2 CLW1 O1 91.9(9) 5 39_454 ?
CLW1 CLW1 O1 123.4(2) 9 39_454 ?
CLW1 CLW1 O1 75.6(2) 5 39_454 ?
Mn2 CLW1 O1 80.0(2) 5 39_454 ?
Mn2 CLW1 O1 80.0(2) 31_454 39_454 ?
O2 CLW1 O1 109.2(3) 4_455 39_454 ?
O2 CLW1 O1 54.25(10) 39_454 39_454 ?
CLW2 CLW1 O1 100.0(2) . 4_455 ?
CLW2 CLW1 O1 91.9(9) 9 4_455 ?
CLW2 CLW1 O1 108.1(7) 5 4_455 ?
CLW1 CLW1 O1 75.6(2) 9 4_455 ?
CLW1 CLW1 O1 123.4(2) 5 4_455 ?
Mn2 CLW1 O1 80.0(2) 5 4_455 ?
Mn2 CLW1 O1 80.0(2) 31_454 4_455 ?
O2 CLW1 O1 54.25(10) 4_455 4_455 ?
O2 CLW1 O1 109.2(3) 39_454 4_455 ?
O1 CLW1 O1 160.0(4) 39_454 4_455 ?
CLW2 CLW1 O1 99.4(2) . 42_544 ?
CLW2 CLW1 O1 91.2(9) 9 42_544 ?
CLW2 CLW1 O1 107.5(7) 5 42_544 ?
CLW1 CLW1 O1 74.9(2) 9 42_544 ?
CLW1 CLW1 O1 122.9(2) 5 42_544 ?
Mn2 CLW1 O1 80.6(2) 5 42_544 ?
Mn2 CLW1 O1 80.6(2) 31_454 42_544 ?
O2 CLW1 O1 101.3(2) 4_455 42_544 ?
O2 CLW1 O1 64.18(12) 39_454 42_544 ?
O1 CLW1 O1 106.50(10) 39_454 42_544 ?
O1 CLW1 O1 70.08(6) 4_455 42_544 ?
CLW2 CLW2 CLW2 60.0 9 5 ?
CLW2 CLW2 CLW1 150.000(17) 9 . ?
CLW2 CLW2 CLW1 150.000(12) 5 . ?
CLW2 CLW2 CLW1 20.0(10) 9 9 ?
CLW2 CLW2 CLW1 80.0(9) 5 9 ?
CLW1 CLW2 CLW1 130.0(9) . 9 ?
CLW2 CLW2 CLW1 80.0(9) 9 5 ?
CLW2 CLW2 CLW1 20.0(10) 5 5 ?
CLW1 CLW2 CLW1 130.0(9) . 5 ?
CLW1 CLW2 CLW1 100.0(19) 9 5 ?
CLW2 CLW2 Mn2 150.00(2) 9 5 ?
CLW2 CLW2 Mn2 150.000(17) 5 5 ?
CLW1 CLW2 Mn2 0.0(13) . 5 ?
CLW1 CLW2 Mn2 130.0(9) 9 5 ?
CLW1 CLW2 Mn2 130.0(9) 5 5 ?
CLW2 CLW2 Mn2 26.9(4) 9 . ?
CLW2 CLW2 Mn2 86.9(3) 5 . ?
CLW1 CLW2 Mn2 123.1(3) . . ?
CLW1 CLW2 Mn2 6.9(6) 9 . ?
CLW1 CLW2 Mn2 106.9(13) 5 . ?
Mn2 CLW2 Mn2 123.1(3) 5 . ?
CLW2 CLW2 Mn2 86.9(3) 9 9 ?
CLW2 CLW2 Mn2 26.9(4) 5 9 ?
CLW1 CLW2 Mn2 123.1(3) . 9 ?
CLW1 CLW2 Mn2 106.9(13) 9 9 ?
CLW1 CLW2 Mn2 6.9(6) 5 9 ?
Mn2 CLW2 Mn2 123.1(3) 5 9 ?
Mn2 CLW2 Mn2 113.7(7) . 9 ?
CLW2 CLW2 O1 134.7(4) 9 39_454 ?
CLW2 CLW2 O1 87.2(3) 5 39_454 ?
CLW1 CLW2 O1 67.8(4) . 39_454 ?
CLW1 CLW2 O1 144.9(5) 9 39_454 ?
CLW1 CLW2 O1 70.6(4) 5 39_454 ?
Mn2 CLW2 O1 67.8(4) 5 39_454 ?
Mn2 CLW2 O1 146.7(2) . 39_454 ?
Mn2 CLW2 O1 64.99(4) 9 39_454 ?
CLW2 CLW2 O1 87.2(3) 9 4_455 ?
CLW2 CLW2 O1 134.7(4) 5 4_455 ?
CLW1 CLW2 O1 67.8(4) . 4_455 ?
CLW1 CLW2 O1 70.6(4) 9 4_455 ?
CLW1 CLW2 O1 144.9(5) 5 4_455 ?
Mn2 CLW2 O1 67.8(4) 5 4_455 ?
Mn2 CLW2 O1 64.99(4) . 4_455 ?
Mn2 CLW2 O1 146.7(2) 9 4_455 ?
O1 CLW2 O1 135.6(7) 39_454 4_455 ?
CLW2 CLW2 O1 86.6(4) 9 42_544 ?
CLW2 CLW2 O1 134.2(3) 5 42_544 ?
CLW1 CLW2 O1 68.4(4) . 42_544 ?
CLW1 CLW2 O1 69.9(4) 9 42_544 ?
CLW1 CLW2 O1 144.7(6) 5 42_544 ?
Mn2 CLW2 O1 68.4(4) 5 42_544 ?
Mn2 CLW2 O1 64.35(5) . 42_544 ?
Mn2 CLW2 O1 146.6(2) 9 42_544 ?
O1 CLW2 O1 97.9(3) 39_454 42_544 ?
O1 CLW2 O1 65.43(19) 4_455 42_544 ?
CLW2 CLW2 O1 134.2(3) 9 8_545 ?
CLW2 CLW2 O1 86.6(4) 5 8_545 ?
CLW1 CLW2 O1 68.4(4) . 8_545 ?
CLW1 CLW2 O1 144.7(6) 9 8_545 ?
CLW1 CLW2 O1 69.9(4) 5 8_545 ?
Mn2 CLW2 O1 68.4(4) 5 8_545 ?
Mn2 CLW2 O1 146.6(2) . 8_545 ?
Mn2 CLW2 O1 64.35(5) 9 8_545 ?
O1 CLW2 O1 65.43(19) 39_454 8_545 ?
O1 CLW2 O1 97.9(3) 4_455 8_545 ?
O1 CLW2 O1 136.9(7) 42_544 8_545 ?

_shelx_res_file
;
TITL FCHMAG_1_0m in Ia-3d
    FCHMAG_1_0m.res
    created by SHELXL-2018/3 at 07:48:11 on 20-Jun-2022
REM FCHMAG_1_0m.res
REM created by SHELXL-2018/3 at 06:45:16 on 20-Jun-2022
CELL 0.71073  19.71440  19.71440  19.71440  90.0000  90.0000  90.0000
ZERR 1.00000 0.00052 0.00052 0.00052 0.0000 0.0000 0.0000
LATT  2
SYMM 0.5-X, -Y, 0.5+Z
SYMM -X, 0.5+Y, 0.5-Z
SYMM 0.5+X, 0.5-Y, -Z
SYMM Z, X, Y
SYMM 0.5+Z, 0.5-X, -Y
SYMM 0.5-Z, -X, 0.5+Y
SYMM -Z, 0.5+X, 0.5-Y
SYMM Y, Z, X
SYMM -Y, 0.5+Z, 0.5-X
SYMM 0.5+Y, 0.5-Z, -X
SYMM 0.5-Y, -Z, 0.5+X
SYMM 0.75+Y, 0.25+X, 0.25-Z
SYMM 0.75-Y, 0.75-X, 0.75-Z
SYMM 0.25+Y, 0.25-X, 0.75+Z
SYMM 0.25-Y, 0.75+X, 0.25+Z
SYMM 0.75+X, 0.25+Z, 0.25-Y
SYMM 0.25-X, 0.75+Z, 0.25+Y
SYMM 0.75-X, 0.75-Z, 0.75-Y
SYMM 0.25+X, 0.25-Z, 0.75+Y
SYMM 0.75+Z, 0.25+Y, 0.25-X
SYMM 0.25+Z, 0.25-Y, 0.75+X
SYMM 0.25-Z, 0.75+Y, 0.25+X
SYMM 0.75-Z, 0.75-Y, 0.75-X
SFAC As Mn O

UNIT 96 146.504 306.104
LIST 4 ! automatically inserted. Change 6 to 4 for CHECKCIF!!
TEMP 293
ACTA
SIZE 0.069 0.126 0.148
L.S. 12
OMIT 0 6 6
OMIT 1 6 7
OMIT 4 6 6
OMIT 1 2 7
OMIT 2 4 6
OMIT 3 4 7
OMIT 4 5 7
OMIT 2 2 8
OMIT 1 4 7
OMIT 0 2 6
OMIT 2 3 5
OMIT 1 2 5
OMIT 2 3 7
OMIT 0 2 2
OMIT 1 1 6
OMIT 2 5 5
OMIT 1 5 6
OMIT 3 4 5
OMIT 2 3 9
HTAB
REM OMIT 0 60
REM
CONN MN1 8 3
CONN MX 12 4
CONN CLW1 12 4
CONN CLW2 12 4
REM CONN CLW 10 3.2
REM
REM DAMP 1000
REM
BOND
FMAP 2
PLAN 30
HTAB
REM
WGHT    0.009700    7.599500
EXTI    0.000020
FVAR       0.00702   0.97824   0.51043   0.15784   0.26448   0.11268
MOLE   1
REM
MN1   2    0.250000    0.375000    0.000000    20.25000    0.01585    0.02518 =
         0.01585    0.00000    0.00000    0.00000
REM PBM = 1/4, 3/8, 0
REM
MN2   2    0.240013    0.125000    0.009987    30.50000    0.03291    0.00863 =
         0.03291   -0.00017   -0.02510   -0.00017
REM PBM = 0.23263, 1/8, 1/4-X, 1/2-occupied
REM
MN3   2    0.375000    0.264715    0.014715    10.50000    0.01162    0.01401 =
         0.01401   -0.00226   -0.00142    0.00142
REM PBM = 3/8, .26423, y-1/4
REM
MN4   2    0.112691    0.362691    0.125000    10.50000    0.01027    0.01027 =
         0.00996    0.00129   -0.00129   -0.00255
REM PBM M4 = 0.11266, 1/4+X, 1/8
REM

MX    2    0.000000    0.000000    0.000000    40.16667    0.06437    0.06437 =
         0.06437    0.01678    0.01678    0.01678
REM PBM = 0.00750, 0.01336, -0.00073
REM
AS1   1    0.498066    0.367117    0.008758    11.00000    0.00901    0.00946 =
         0.01187    0.00086   -0.00113    0.00041
REM PBM = 0.49912, 0.36620, 0.00839
REM
O1    3    0.571287    0.323071    0.031968    11.00000    0.01556    0.02994 =
         0.03386   -0.01771   -0.01357    0.01314
REM PBM = 0.56979, 0.32014, 0.03660
REM
O2    3    0.460182    0.316696   -0.055675    11.00000    0.01490    0.02001 =
         0.01351   -0.00248   -0.00597    0.00314
REM PBM = 0.46116, 0.31841, -0.05683
REM
O3    3    0.445524    0.331854    0.073435    11.00000    0.01684    0.02248 =
         0.01608   -0.00342    0.00646   -0.00380
REM PBM = 0.44445, 0.33379, 0.07270
REM

REM
CLW1  3    0.091789    0.158211    0.125000    50.50000    0.02735    0.02735 =
         0.03188   -0.00187   -0.00187    0.00271
REM PBM   0.14136  1/4-X   0.125

REM
CLW2  3    0.117470    0.132530    0.125000    60.50000    0.03014    0.03014 =
         0.14993   -0.06250   -0.06250    0.03446

REM

REM
REM
HKLF 4


REM  FCHMAG_1_0m in Ia-3d
REM wR2 = 0.025611, GooF = S = 1.07029, Restrained GooF = 1.07029 for all data
REM R1 = 0.011882 for 1093 Fo > 4sig(Fo) and 0.017348 for all 1241 data
REM 72 parameters refined using 0 restraints

END

WGHT      0.0097      7.5905

REM No hydrogen bonds found for HTAB generation

REM Highest difference peak  0.293,  deepest hole -0.382,  1-sigma level  0.064
Q1    1   0.5131  0.3980 -0.0027  11.00000  0.05    0.29
Q2    1   0.5690  0.3405  0.0008  11.00000  0.05    0.27
Q3    1   0.4831  0.3325 -0.0720  11.00000  0.05    0.27
Q4    1   0.4830  0.3477  0.0407  11.00000  0.05    0.26
Q5    1   0.4786  0.3177 -0.0291  11.00000  0.05    0.25
Q6    1   0.3750  0.2423 -0.0077  10.50000  0.05    0.24
Q7    1   0.4702  0.2794 -0.0765  11.00000  0.05    0.24
Q8    1   0.0772  0.0961  0.0855  11.00000  0.05    0.24
Q9    1   0.4812  0.3883 -0.0665  11.00000  0.05    0.23
Q10   1   0.5540  0.3177  0.0364  11.00000  0.05    0.22
Q11   1   0.5633  0.3049  0.0347  11.00000  0.05    0.22
Q12   1   0.0552  0.1280  0.1516  11.00000  0.05    0.21
Q13   1   0.4808  0.3400 -0.0167  11.00000  0.05    0.21
Q14   1   0.5301  0.3331  0.0072  11.00000  0.05    0.20
Q15   1   0.1046  0.1560  0.0607  11.00000  0.05    0.20
Q16   1   0.4614  0.3530  0.0424  11.00000  0.05    0.19
Q17   1   0.2500  0.4506  0.0000  10.50000  0.05    0.19
Q18   1   0.3733  0.2500  0.0448  11.00000  0.05    0.19
Q19   1   0.0425  0.1154  0.1235  11.00000  0.05    0.19
Q20   1   0.4932  0.3953 -0.0253  11.00000  0.05    0.19
Q21   1   0.2364  0.4125 -0.0178  11.00000  0.05    0.19
Q22   1   0.4198  0.2806  0.0480  11.00000  0.05    0.18
Q23   1   0.4299  0.3404  0.0975  11.00000  0.05    0.18
Q24   1   0.1158  0.3819  0.1498  11.00000  0.05    0.18
Q25   1   0.4878  0.3022 -0.0237  11.00000  0.05    0.18
Q26   1   0.5696  0.4051  0.0064  11.00000  0.05    0.18
Q27   1   0.5764  0.3427  0.0657  11.00000  0.05    0.18
Q28   1   0.2733  0.3603  0.0098  11.00000  0.05    0.18
Q29   1   0.0985  0.1419  0.0774  11.00000  0.05    0.18
Q30   1   0.2500  0.3520  0.0000  10.50000  0.05    0.18
;
_shelx_res_checksum               68865
_shelx_hkl_file
;
  -1  -1   0    0.00    0.00
  -1  -1   0    0.00    0.01
  -1   0  -1    0.00    0.00
  -1   0  -1    0.00    0.01
  -1   0   1    0.00    0.00
  -1   0   1    0.01    0.00
  -1   1   0    0.01    0.01
  -1   1   0    0.01    0.00
   0  -1  -1    0.00    0.00
   0  -1   1    0.00    0.00
   0   1  -1    0.00    0.00
   0   1  -1    0.00    0.01
   0   1   1    0.00    0.00
   0   1   1    0.00    0.01
   1   0  -1    0.00    0.00
   1   0  -1    0.00    0.01
   1   0   1    0.00    0.01
   1   0   1    0.00    0.00
   1   1   0   -0.01    0.01
   1   1   0    0.00    0.00
  -2   0   0    0.01    0.01
  -2   0   0    0.01    0.01
  -2   0   0    0.02    0.01
   0   0  -2    0.00    0.01
   0   0  -2    0.03    0.01
   0   0   2    0.02    0.01
   0   0   2    0.00    0.00
   0   0   2    0.00    0.01
   0   2   0    0.02    0.01
   0   2   0    0.02    0.01
   0   2   0    0.04    0.01
   0   2   0    0.02    0.01
   2   0   0    0.00    0.01
   2   0   0    0.02    0.01
  -2  -1  -1    5.96    0.22
  -2  -1  -1    6.30    0.22
   1   1  -2    6.17    0.21
  -1   2   1    6.55    0.21
   1   2  -1    6.20    0.22
  -2   1   1    5.77    0.22
  -2   1   1    6.20    0.21
  -1  -2  -1    6.18    0.22
   2  -1   1    6.47    0.21
   2   1  -1    6.32    0.22
   1  -1   2    6.28    0.21
  -1  -1  -2    6.25    0.22
   1   1  -2    5.92    0.22
  -1   2   1    6.50    0.21
  -1   2   1    6.26    0.21
  -1   1   2    6.23    0.21
  -1   2   1    6.21    0.21
  -1   2  -1    6.08    0.21
  -2  -1   1    6.35    0.21
  -1   1  -2    6.20    0.21
  -2  -1   1    6.36    0.21
   1  -1  -2    6.32    0.22
   1  -1  -2    6.19    0.21
  -1  -2   1    6.23    0.21
  -1   2  -1    5.75    0.22
  -1   2  -1    6.26    0.21
  -1   1  -2    6.16    0.22
   1   1   2    6.38    0.21
   1   1   2    6.49    0.21
  -2   1  -1    6.52    0.21
   1   2   1    6.33    0.22
   1   2   1    6.13    0.22
   2  -1  -1    5.74    0.21
  -1  -2   1    6.06    0.21
   2   1   1    6.00    0.22
   2   1   1    6.16    0.21
  -2  -2   0    1.33    0.06
  -2  -2   0    1.29    0.06
  -2   0  -2    1.29    0.06
  -2   0  -2    1.39    0.06
  -2   0  -2    1.54    0.05
  -2   0   2    1.27    0.05
  -2   0   2    1.11    0.05
  -2   2   0    1.24    0.06
  -2   2   0    1.23    0.05
  -2   2   0    1.30    0.05
   0  -2  -2    1.37    0.06
   0  -2   2    1.20    0.05
   0   2  -2    1.17    0.05
   0   2  -2    1.10    0.06
   0   2   2    1.35    0.05
   0   2   2    1.36    0.06
   0   2   2    1.27    0.06
   2  -2   0    1.19    0.05
   2   0  -2    1.17    0.06
   2   0   2    1.49    0.05
   2   2   0    1.26    0.05
   2   2   0    1.33    0.06
   3  -1   0    0.04    0.01
   3  -1   0    0.04    0.02
   3   1   0    0.02    0.02
   3   1   0    0.03    0.02
   0   3   1    0.04    0.01
   0   3   1    0.04    0.01
   0   3   1    0.03    0.01
   0   3   1    0.03    0.02
   1   0  -3    0.04    0.01
   1   0  -3    0.04    0.02
   1   0  -3    0.07    0.02
   1   0   3    0.04    0.01
   1   0   3    0.06    0.01
   0   3  -1    0.06    0.02
  -1   0  -3    0.07    0.02
  -1   0  -3    0.06    0.02
  -1   0   3    0.03    0.01
  -1   0   3    0.04    0.01
   0  -3   1    0.03    0.02
   0  -3   1    0.03    0.01
   0   3  -1    0.04    0.01
  -3  -1   0    0.06    0.01
  -3   1   0    0.04    0.02
  -3   1   0    0.03    0.01
  -1   0  -3    0.05    0.02
  -3  -1   0    0.08    0.02
  -3  -1   0    0.07    0.02
  -3  -1   0    0.04    0.01
   3   0   1    0.05    0.02
   3   0   1    0.03    0.02
   3   0   1    0.01    0.01
   3   0  -1    0.05    0.02
   3   0  -1    0.05    0.02
   3   0  -1    0.05    0.02
   0   1   3    0.06    0.02
   1   3   0    0.04    0.02
   1   3   0    0.06    0.02
   1   3   0    0.06    0.02
   0  -1   3    0.04    0.01
   0  -1   3    0.04    0.01
   0   1  -3    0.02    0.01
   0   1  -3    0.04    0.02
   0   1  -3    0.07    0.02
   0   1   3    0.03    0.01
   0   1   3    0.04    0.01
   0  -1  -3    0.08    0.02
  -3   0   1    0.06    0.01
  -1  -3   0    0.03    0.01
  -1  -3   0    0.05    0.02
  -1  -3   0    0.04    0.02
  -1   3   0    0.05    0.01
  -1   3   0    0.04    0.02
  -1   3   0    0.04    0.01
  -1   3   0    0.04    0.02
   0  -1  -3    0.03    0.02
  -3   0  -1    0.07    0.02
  -3   0  -1    0.08    0.02
  -3   0  -1    0.06    0.01
  -3   0   1    0.03    0.01
   2   1  -3    3.08    0.11
   3  -2   1    3.17    0.11
   3   2  -1    3.14    0.12
   3   2  -1    3.05    0.12
  -1   3   2    3.08    0.11
  -1   3   2    3.02    0.12
  -1   3   2    3.01    0.12
  -2  -1  -3    3.14    0.13
   1  -3   2    3.10    0.11
   1  -3   2    3.14    0.12
   1   3  -2    3.05    0.12
   1   3  -2    2.76    0.12
  -3  -2  -1    3.10    0.11
  -2   1   3    3.01    0.11
  -2   1   3    3.14    0.12
   2  -1   3    3.16    0.11
   2   1  -3    3.16    0.11
   2   1  -3    3.13    0.13
  -3   2   1    3.23    0.11
  -2  -1  -3    3.19    0.12
  -1  -3  -2    3.17    0.11
  -2  -1  -3    3.11    0.13
  -3  -2  -1    3.20    0.12
  -1  -3  -2    3.15    0.12
  -3   2   1    3.15    0.12
  -2   1  -3    2.99    0.12
   2  -1  -3    3.04    0.12
  -2   1  -3    3.01    0.13
   1   3   2    3.08    0.12
   3   2   1    3.16    0.12
  -1  -3   2    2.97    0.11
  -1  -3   2    2.94    0.12
  -1   3  -2    2.99    0.13
  -1   3  -2    3.10    0.11
   3   2   1    3.09    0.13
   3   2   1    2.94    0.12
   3  -2  -1    3.20    0.12
   2   1   3    3.19    0.12
   1  -3  -2    3.03    0.12
   3  -2  -1    3.23    0.11
  -2  -1   3    3.10    0.11
  -2  -1   3    3.18    0.12
  -3  -2   1    3.15    0.12
  -3  -2   1    3.02    0.12
  -3   2  -1    3.12    0.13
  -3   2  -1    3.16    0.11
  -3  -2   1    3.08    0.12
   2  -1  -3    3.10    0.13
   2   1   3    3.12    0.12
   3   1  -2    2.98    0.12
  -2  -3  -1    3.03    0.12
  -2  -3  -1    3.01    0.12
   3   1  -2    3.03    0.13
   3   1  -2    3.02    0.12
   3  -1   2    3.06    0.11
  -3  -1  -2    3.07    0.12
   1  -2   3    3.11    0.11
   1   2  -3    3.18    0.11
  -1  -2  -3    3.14    0.12
   1   2  -3    3.12    0.13
   1   2  -3    2.96    0.12
  -2   3   1    3.03    0.12
  -1  -2  -3    3.16    0.12
   2  -3   1    3.20    0.11
   2   3  -1    3.10    0.12
   2   3  -1    2.92    0.12
  -2   3   1    3.15    0.12
  -3   1   2    3.04    0.11
  -3  -1  -2    3.24    0.12
  -2  -3  -1    3.15    0.13
  -1   2   3    3.15    0.12
  -1   2   3    3.04    0.12
  -3  -1  -2    3.13    0.13
  -2   3   1    3.09    0.11
  -2   3   1    3.14    0.11
   1  -2  -3    3.01    0.12
   3   1   2    3.10    0.11
   3  -1  -2    3.12    0.12
   1  -2  -3    3.08    0.11
  -3   1  -2    3.12    0.11
  -1   2  -3    3.08    0.11
   3  -1  -2    3.11    0.11
  -1   2  -3    3.03    0.11
   3   1   2    3.13    0.11
  -2  -3   1    3.05    0.12
  -2  -3   1    3.15    0.12
  -2   3  -1    3.13    0.12
  -2   3  -1    3.13    0.13
  -2   3  -1    3.11    0.11
  -1   2  -3    2.97    0.13
   2   3   1    3.09    0.12
   1  -2  -3    2.96    0.12
   1   2   3    3.04    0.12
   1   2   3    3.23    0.12
   3  -1  -2    3.02    0.12
  -1  -2   3    3.19    0.11
  -1  -2   3    3.15    0.12
  -3  -1   2    3.07    0.11
  -3  -1   2    3.11    0.11
  -3   1  -2    3.16    0.12
  -3   1  -2    3.04    0.12
  -3  -3   0    0.00    0.03
  -3  -3   0    0.00    0.03
  -3   0  -3    0.04    0.03
  -3   0  -3    0.00    0.03
  -3   0  -3    0.02    0.02
  -3   0   3   -0.01    0.02
  -3   0   3    0.02    0.02
  -3   3   0    0.02    0.03
  -3   3   0    0.02    0.02
  -3   3   0    0.01    0.02
   0  -3  -3   -0.01    0.02
   0  -3  -3    0.02    0.02
   0  -3   3    0.01    0.02
   0  -3   3    0.01    0.02
   0   3  -3    0.01    0.02
   0   3  -3   -0.02    0.03
   0   3   3    0.00    0.02
   0   3   3   -0.01    0.02
   0   3   3   -0.01    0.02
   3  -3   0    0.00    0.01
   3   0  -3    0.02    0.02
   3   0  -3    0.06    0.03
   3   0  -3    0.02    0.03
   3   0   3   -0.01    0.02
   3   0   3    0.02    0.02
   3   3   0    0.01    0.03
   3   3   0    0.03    0.02
   3   3   0    0.01    0.02
  -3  -3  -2    0.66    0.06
  -3  -3  -2    0.66    0.05
   3   2  -3    0.72    0.06
   3   2  -3    0.77    0.04
  -2  -3  -3    0.62    0.04
  -3  -2  -3    0.70    0.05
  -3  -2  -3    0.59    0.06
   3   3  -2    0.74    0.06
   3   3  -2    0.74    0.06
   3  -2   3    0.74    0.05
   3  -2   3    0.73    0.04
  -3   2   3    0.69    0.05
  -3   2   3    0.79    0.05
   3  -3   2    0.77    0.04
   2   3  -3    0.76    0.05
  -3   3   2    0.79    0.06
  -3   3   2    0.70    0.05
   2   3  -3    0.71    0.05
  -2  -3  -3    0.68    0.05
   3   2  -3    0.70    0.05
   2   3  -3    1.04    0.08
   2  -3   3    0.72    0.04
  -2   3   3    0.73    0.05
  -2   3   3    0.78    0.03
  -2   3  -3    0.74    0.04
  -2   3  -3    0.64    0.06
  -2   3  -3    0.73    0.05
   2  -3  -3    0.80    0.05
   2  -3  -3    0.67    0.06
  -2  -3   3    0.87    0.05
  -3  -3   2    0.72    0.05
  -2  -3   3    0.73    0.05
  -3   3  -2    0.86    0.04
   2   3   3    0.65    0.05
   2   3   3    0.64    0.05
   3  -3  -2    0.79    0.04
   3  -3  -2    0.71    0.05
  -3   3  -2    0.83    0.06
   3  -2  -3    0.71    0.03
   3  -2  -3    0.86    0.05
   3  -2  -3    0.69    0.06
  -3   2  -3    0.70    0.06
  -3   2  -3    0.76    0.05
  -2  -3   3    0.78    0.04
  -3  -3   2    0.71    0.05
  -3  -3   2    0.78    0.06
   3   2   3    0.71    0.05
   3   2   3    0.66    0.04
   3   2   3    0.68    0.05
  -3  -2   3    0.76    0.04
  -3  -2   3    0.76    0.05
   3   3   2    0.64    0.06
   3   3   2    0.57    0.05
  -4   0   0   16.30    0.55
  -4   0   0   16.06    0.55
  -4   0   0   16.56    0.54
   0   0  -4   15.74    0.55
   0   0  -4   16.02    0.55
   0   0   4   15.71    0.54
   0   0   4   16.28    0.54
   0   0   4   15.95    0.54
   0   4   0   16.06    0.54
   0   4   0   16.48    0.55
   0   4   0   16.23    0.54
   0   4   0   16.31    0.55
   4   0   0   16.09    0.55
   4   0   0   16.22    0.55
   0   4   2    0.01    0.02
   0   4   2    0.01    0.03
   2   0  -4    0.04    0.01
   2   0  -4    0.03    0.04
   2   0  -4    0.06    0.02
   2   0   4    0.04    0.02
   2   0   4    0.03    0.02
   4  -2   0    0.03    0.02
   4  -2   0    0.05    0.02
   4   2   0    0.08    0.04
   4   2   0    0.03    0.03
   4   2   0    0.04    0.02
   4   2   0    0.06    0.02
   0   4   2    0.05    0.02
   0  -4   2    0.05    0.02
   0  -4   2    0.05    0.02
   0   4  -2    0.01    0.02
   0   4  -2    0.01    0.03
   0   4   2    0.02    0.02
   0  -4  -2    0.02    0.02
   0  -4   2    0.03    0.01
  -2   0   4    0.02    0.02
  -4  -2   0    0.02    0.03
  -4  -2   0    0.05    0.03
  -4   2   0   -0.01    0.03
  -4   2   0    0.05    0.02
  -2   0  -4    0.05    0.03
  -2   0  -4    0.03    0.03
  -2   0   4    0.02    0.02
  -1   4   1    0.00    0.03
   1   4  -1    0.04    0.03
  -1   4   1    0.00    0.02
   1   1  -4   -0.07    0.03
   1   1  -4    0.00    0.03
  -1  -1  -4   -0.01    0.03
  -1  -1  -4    0.03    0.02
   1   4  -1   -0.02    0.02
   1   1  -4    0.00    0.01
   4  -1   1    0.02    0.02
  -4   1   1    0.01    0.03
  -4   1   1   -0.02    0.02
  -4   1   1   -0.02    0.01
  -1  -4  -1    0.03    0.01
  -1  -4  -1    0.01    0.02
  -4  -1  -1    0.01    0.02
  -4  -1  -1    0.01    0.03
  -4  -1  -1    0.02    0.02
  -1  -1  -4   -0.02    0.03
   1  -1   4    0.01    0.02
   4  -1   1    0.01    0.02
   4   1  -1   -0.03    0.03
   4   1  -1    0.00    0.03
   4   1  -1    0.04    0.02
  -1   4   1    0.00    0.02
   1  -1   4    0.00    0.02
  -1   1   4    0.03    0.02
  -1   1   4    0.02    0.02
  -1   4   1   -0.01    0.02
  -1  -4   1    0.03    0.03
  -1  -4   1    0.00    0.02
  -1  -4   1    0.00    0.02
  -1   1  -4    0.02    0.04
   1   4   1    0.01    0.02
   1   4   1    0.00    0.02
   1  -1  -4   -0.01    0.03
   1  -1  -4    0.03    0.02
   1   1   4    0.00    0.02
  -1   1  -4    0.01    0.02
   4   1   1    0.00    0.03
   4   1   1    0.01    0.02
   4   1   1    0.05    0.02
  -1   1  -4    0.00    0.03
  -4  -1   1    0.00    0.02
  -4  -1   1   -0.01    0.02
  -4  -1   1    0.01    0.02
  -1   4  -1    0.00    0.02
  -1   4  -1    0.00    0.03
   1   4   1    0.01    0.03
   4  -1  -1    0.04    0.02
   4  -1  -1    0.00    0.02
  -4   1  -1   -0.01    0.02
   1   1   4    0.01    0.02
  -1  -1   4    0.00    0.01
  -1  -1   4    0.02    0.02
  -1   4  -1    0.01    0.01
  -4   1  -1    0.01    0.03
  -4  -3  -1    0.11    0.04
  -4  -3  -1    0.16    0.04
   3   1  -4    0.24    0.05
  -3   1   4    0.18    0.03
   3   1  -4    0.22    0.03
  -1  -4  -3    0.22    0.03
   4  -3   1    0.16    0.03
   4  -3   1    0.20    0.02
  -1   4   3    0.16    0.03
   4   3  -1    0.25    0.04
  -3  -1  -4    0.16    0.03
   1  -4   3    0.20    0.02
   1  -4   3    0.21    0.03
  -1   4   3    0.21    0.02
  -1   4   3    0.20    0.03
  -3   1   4    0.21    0.03
   3  -1   4    0.20    0.03
   3   1  -4    0.27    0.03
   1   4  -3    0.21    0.03
  -4   3   1    0.24    0.04
   3  -1   4    0.18    0.03
  -4   3   1    0.19    0.03
  -4   3   1    0.22    0.03
   1   4  -3    0.22    0.05
  -3  -1  -4    0.11    0.04
   4   3  -1    0.21    0.04
  -1  -4  -3    0.11    0.03
  -1  -4  -3    0.14    0.03
  -4  -3   1    0.21    0.03
   4   3   1    0.18    0.02
   3   1   4    0.18    0.03
   3  -1  -4    0.23    0.04
  -3  -1   4    0.30    0.03
  -3   1  -4    0.12    0.04
  -3   1  -4    0.14    0.04
  -1  -4   3    0.18    0.03
  -1   4  -3    0.16    0.03
  -1   4  -3    0.14    0.04
   3  -1  -4    0.25    0.04
   4   3   1    0.17    0.04
   3  -1  -4    0.20    0.02
   1  -4  -3    0.14    0.03
  -1  -4   3    0.19    0.03
   3   1   4    0.09    0.03
   1  -4  -3    0.17    0.03
   4   3   1    0.17    0.05
   1   4   3    0.10    0.03
   1   4   3    0.17    0.04
  -4  -3   1    0.26    0.04
  -3  -1   4    0.25    0.03
   4  -3  -1    0.21    0.03
   4  -3  -1    0.25    0.03
  -4   3  -1    0.24    0.04
  -4   3  -1    0.22    0.03
   4   3   1    0.16    0.03
  -4  -3   1    0.21    0.03
   4   0  -2    0.00    0.03
   4   0  -2    0.04    0.03
   4   0   2    0.05    0.03
   4   0  -2    0.02    0.03
   2   4   0    0.06    0.03
   2   4   0    0.02    0.02
   2   4   0    0.06    0.03
   0   2   4    0.06    0.02
   0   2   4    0.02    0.02
  -4   0  -2    0.05    0.02
   0   2  -4    0.04    0.01
   0   2   4    0.05    0.02
  -2   4   0    0.03    0.02
   0  -2  -4    0.02    0.03
   0   2  -4    0.03    0.02
   0   2  -4    0.03    0.04
  -4   0  -2    0.02    0.03
  -2  -4   0    0.07    0.02
  -4   0   2    0.03    0.02
  -4   0   2    0.02    0.02
   0  -2  -4    0.07    0.03
   0  -2   4    0.04    0.02
  -2   4   0    0.01    0.02
  -2   4   0    0.04    0.03
   0   2  -4    0.03    0.03
  -4   0  -2    0.09    0.03
  -2  -4   0    0.07    0.03
  -2  -4   0    0.04    0.03
   4   0   2    0.02    0.02
   4   0   2    0.07    0.02
  -2   4   0    0.02    0.02
   2  -4   2   15.23    0.51
   4  -2   2   15.00    0.50
  -4  -2  -2   14.08    0.52
  -4  -2  -2   14.45    0.52
   2   2  -4   15.41    0.51
   2   2  -4   14.51    0.52
   2   2  -4   15.23    0.51
  -2   2   4   15.56    0.51
  -4   2   2   14.98    0.51
  -4   2   2   15.51    0.51
  -2  -4  -2   14.86    0.51
   4   2  -2   15.17    0.52
   2   4  -2   14.71    0.52
  -2   4   2   15.55    0.51
   4  -2   2   15.19    0.51
  -4  -2  -2   14.77    0.51
  -2  -2  -4   15.21    0.51
   4   2  -2   15.21    0.52
   2   4  -2   14.73    0.51
  -2   4   2   15.44    0.51
  -2   4   2   15.20    0.52
  -2   2   4   14.43    0.51
   2  -2   4   15.44    0.51
   2  -2   4   14.87    0.51
  -2  -4  -2   14.89    0.52
  -2  -2  -4   14.64    0.52
  -2   4   2   14.86    0.52
   2  -4   2   14.81    0.51
  -4   2  -2   15.02    0.51
  -2   2  -4   15.32    0.51
   4   2   2   14.11    0.52
   4  -2  -2   14.81    0.52
   2  -2  -4   14.84    0.52
   2  -2  -4   15.15    0.51
  -2   4  -2   14.90    0.52
  -2   4  -2   15.58    0.51
  -4  -2   2   15.02    0.51
  -4  -2   2   15.29    0.51
  -4   2  -2   15.03    0.52
   2  -2  -4   15.12    0.51
   2   2   4   14.90    0.50
   2   2   4   14.92    0.51
  -2  -2   4   15.45    0.51
   4   2   2   14.82    0.51
   2   4   2   14.99    0.52
   2   4   2   15.34    0.52
   4  -2  -2   15.31    0.51
   2   2   4   14.71    0.51
  -2  -2   4   15.34    0.50
  -2  -4   2   15.12    0.51
  -2  -4   2   15.70    0.52
  -2  -4   2   15.06    0.51
   4   2   2   14.93    0.51
  -2   4  -2   15.40    0.50
  -3   4   1    0.13    0.03
  -4   1   3    0.18    0.03
  -4   1   3    0.26    0.03
  -3  -4  -1    0.13    0.04
   4  -1   3    0.13    0.03
   4  -1   3    0.21    0.02
   4   1  -3    0.18    0.03
   4   1  -3    0.25    0.05
   4   1  -3    0.29    0.04
  -3   4   1    0.15    0.04
  -1   3   4    0.23    0.02
  -3   4   1    0.18    0.02
  -1   3   4    0.19    0.03
  -4  -1  -3    0.13    0.03
   1  -3   4    0.20    0.03
   3   4  -1    0.20    0.04
   3   4  -1    0.29    0.04
   1   3  -4    0.19    0.05
   1   3  -4    0.23    0.04
  -3   4   1    0.24    0.03
  -1  -3  -4    0.16    0.03
   1   3  -4    0.26    0.03
  -4  -1  -3    0.16    0.03
  -4  -1  -3    0.16    0.04
  -1  -3  -4    0.08    0.03
  -3  -4  -1    0.13    0.04
  -1   3   4    0.22    0.03
  -1  -3  -4    0.12    0.03
   1   3   4    0.10    0.03
  -4  -1   3    0.22    0.03
   4  -1  -3    0.21    0.03
   4  -1  -3    0.18    0.04
   4  -1  -3    0.28    0.04
  -4  -1   3    0.24    0.03
  -3  -4   1    0.22    0.04
  -3  -4   1    0.23    0.04
  -3  -4   1    0.20    0.03
  -3   4  -1    0.20    0.03
  -3   4  -1    0.15    0.04
  -3   4  -1    0.20    0.02
   4   1   3    0.17    0.03
   4   1   3    0.13    0.03
   3   4   1    0.11    0.03
   1  -3  -4    0.20    0.03
   1   3   4    0.11    0.03
  -4   1  -3    0.20    0.04
  -4   1  -3    0.22    0.04
  -1  -3   4    0.25    0.02
  -1  -3   4    0.19    0.03
  -1   3  -4    0.20    0.03
  -1   3  -4    0.18    0.05
  -1   3  -4    0.23    0.02
   4   1   3    0.19    0.03
  -4   1  -3    0.22    0.02
   3   4   1    0.12    0.04
   1  -3  -4    0.21    0.02
   1  -3  -4    0.19    0.04
  -4  -3  -3    0.04    0.02
  -4  -3  -3    0.07    0.04
  -4  -3  -3    0.05    0.03
   3   4  -3    0.05    0.04
   3   4  -3    0.00    0.02
   3  -3   4    0.02    0.02
   3   3  -4    0.01    0.02
   3   3  -4    0.04    0.04
  -4   3   3    0.05    0.02
  -4   3   3   -0.01    0.02
  -3  -4  -3    0.05    0.03
  -3  -4  -3    0.02    0.04
   4   3  -3    0.07    0.03
   4   3  -3    0.02    0.04
   3  -4   3   -0.01    0.02
  -3  -3  -4    0.04    0.02
  -3  -3  -4   -0.01    0.04
  -3  -3  -4   -0.02    0.04
   3  -3   4    0.01    0.02
  -3   4   3    0.02    0.02
   4  -3   3    0.03    0.02
   4  -3   3    0.01    0.02
  -3   3   4    0.01    0.02
  -3   3   4    0.03    0.02
  -3   4   3   -0.03    0.02
  -3   4   3    0.03    0.03
   3   4  -3    0.01    0.02
   3   3  -4    0.03    0.02
  -3  -3   4    0.04    0.03
  -3   4  -3    0.06    0.04
   3  -4  -3    0.03    0.02
   3  -4  -3    0.10    0.04
  -3   4  -3    0.02    0.02
   3  -3  -4    0.03    0.01
   3  -3  -4    0.07    0.03
   3  -3  -4    0.06    0.04
  -3  -3   4   -0.02    0.02
  -4  -3   3    0.01    0.02
  -4   3  -3   -0.03    0.04
  -4   3  -3    0.01    0.02
  -3  -4   3    0.04    0.03
   3   3   4    0.05    0.04
   3   3   4    0.04    0.02
   3   3   4    0.02    0.03
  -3   4  -3    0.02    0.02
  -4  -3   3    0.02    0.02
  -4  -3   3    0.02    0.03
   3   4   3    0.05    0.04
   3   4   3    0.04    0.03
   4  -3  -3    0.04    0.02
   4  -3  -3    0.08    0.03
   4  -3  -3    0.03    0.04
  -3   3  -4    0.01    0.04
  -3   3  -4   -0.01    0.02
  -3  -4   3    0.01    0.02
  -3  -4   3    0.05    0.03
   4   3   3   -0.02    0.04
   4   3   3    0.03    0.03
   4   3   3    0.00    0.03
  -4  -4   0   13.76    0.49
  -4   0  -4   13.64    0.48
  -4   0  -4   13.56    0.49
  -4   0  -4   14.17    0.47
  -4   0   4   14.02    0.47
  -4   0   4   13.96    0.47
  -4   4   0   13.25    0.49
  -4   4   0   13.76    0.47
  -4   4   0   14.15    0.47
   0  -4  -4   14.00    0.46
   0  -4  -4   14.31    0.48
   0  -4  -4   13.58    0.48
   0  -4   4   14.05    0.47
   0  -4   4   14.12    0.48
   0   4  -4   14.11    0.48
   0   4  -4   13.77    0.49
   0   4   4   14.16    0.47
   0   4   4   13.59    0.48
   0   4   4   13.72    0.48
   4  -4   0   13.65    0.47
   4   0  -4   14.28    0.47
   4   0  -4   14.27    0.49
   4   0   4   13.80    0.48
   4   0   4   13.89    0.47
   4   4   0   13.60    0.49
   4   4   0   14.08    0.47
   4   4   0   13.36    0.48
  -4  -4  -2    0.01    0.04
  -4  -4  -2    0.02    0.04
   4  -4   2    0.05    0.02
   2  -4   4    0.04    0.02
   2   4  -4    0.02    0.02
  -4  -2  -4    0.05    0.03
  -4  -2  -4    0.08    0.04
  -4  -2  -4   -0.02    0.03
   4   2  -4    0.01    0.02
   4   2  -4    0.01    0.04
   2  -4   4   -0.01    0.01
   4  -4   2    0.02    0.02
  -4   2   4    0.02    0.02
  -4   2   4    0.07    0.03
   4   4  -2    0.06    0.04
  -2   4   4    0.02    0.01
  -4   4   2    0.06    0.03
  -4   4   2    0.00    0.02
  -4   4   2   -0.03    0.02
  -2  -4  -4    0.01    0.02
  -2  -4  -4    0.05    0.03
  -2  -4  -4    0.02    0.03
  -2   4   4    0.02    0.03
   4   4  -2   -0.06    0.03
   4  -2   4   -0.02    0.02
   4  -2   4    0.01    0.02
   2   4  -4    0.00    0.04
   2   4  -4    0.00    0.03
  -2   4   4    0.01    0.02
  -4   4  -2    0.00    0.02
  -2  -4   4    0.03    0.01
   2  -4  -4    0.02    0.02
   2  -4  -4    0.03    0.03
   2  -4  -4    0.00    0.02
  -4   2  -4    0.06    0.04
  -4  -4   2    0.04    0.03
  -4  -4   2    0.00    0.03
  -2   4  -4    0.05    0.04
  -2   4  -4    0.03    0.01
   2   4   4    0.07    0.04
   2   4   4    0.02    0.03
   4  -4  -2    0.01    0.02
   4  -4  -2    0.03    0.03
  -4   2  -4    0.06    0.03
  -4  -4   2    0.00    0.03
   4  -2  -4    0.02    0.02
   4  -2  -4   -0.01    0.03
   4  -2  -4    0.04    0.04
  -2  -4   4    0.00    0.03
  -2   4  -4    0.01    0.02
  -4  -2   4    0.01    0.02
  -4  -2   4    0.04    0.02
   4   2   4    0.00    0.03
   4   2   4    0.02    0.02
   4   2   4    0.01    0.03
  -2  -4   4    0.01    0.02
  -4   4  -2    0.04    0.04
   4   4   2    0.01    0.04
   4   4   2    0.01    0.03
  -4  -4  -4  869.70   30.75
  -4  -4  -4  832.29   30.62
  -4  -4  -4  807.44   30.64
  -4  -4  -4  891.53   30.63
   4   4  -4  985.21   30.66
   4   4  -4  973.79   30.83
   4  -4   4  863.22   30.59
   4  -4   4  906.20   31.31
   4   4  -4  888.45   30.59
  -4   4   4  888.39   30.60
  -4   4   4  991.01   31.35
   4  -4  -4  943.47   30.90
   4  -4  -4 1000.00   31.32
   4  -4  -4  992.33   30.66
  -4  -4   4  965.02   30.62
  -4   4  -4  907.66   30.66
  -4   4  -4  970.33   31.01
  -4  -4   4  956.61   31.03
  -4  -4   4  963.68   30.61
   4   4   4  944.96   30.64
   4   4   4  976.16   30.55
   4   4   4  879.12   30.61
   0   5  -1    0.02    0.03
   0   5  -1    0.03    0.03
   0   5   1    0.04    0.02
   0   5   1    0.00    0.02
   0   5   1   -0.01    0.02
   0   5   1    0.01    0.03
   1   0  -5    0.00    0.01
   1   0  -5    0.00    0.04
   1   0  -5   -0.03    0.03
   1   0   5    0.01    0.02
   1   0   5    0.00    0.02
   5  -1   0    0.01    0.03
   5  -1   0    0.04    0.03
   5   1   0    0.01    0.03
   5   1   0    0.00    0.03
   0  -5   1   -0.01    0.03
   0   5  -1   -0.01    0.02
  -5  -1   0    0.00    0.03
  -5  -1   0    0.00    0.03
  -5  -1   0    0.00    0.02
  -5   1   0    0.01    0.03
  -5   1   0    0.00    0.02
  -1   0  -5   -0.04    0.04
  -1   0  -5    0.05    0.04
  -1   0  -5    0.01    0.02
  -1   0   5    0.03    0.02
  -1   0   5    0.00    0.02
   0  -5   1   -0.02    0.01
  -5  -1   0   -0.01    0.03
   3   0   5    0.02    0.02
   3   0   5    0.00    0.02
   5  -3   0    0.02    0.02
   5  -3   0    0.01    0.03
   5   3   0    0.03    0.04
   3   0  -5    0.00    0.01
   5   3   0    0.00    0.02
   5   3   0    0.02    0.02
   0   5   3    0.03    0.03
   0   5   3    0.01    0.02
   0   5   3    0.02    0.02
   5   3   0    0.02    0.04
  -5  -3   0   -0.04    0.03
  -5  -3   0    0.03    0.03
  -5   3   0    0.04    0.03
  -5   3   0   -0.01    0.02
  -5   3   0    0.01    0.02
  -3   0  -5   -0.04    0.03
  -3   0  -5    0.01    0.04
  -3   0   5    0.02    0.02
  -3   0   5    0.04    0.03
   0  -5  -3   -0.01    0.02
   0  -5  -3    0.03    0.02
   0  -5   3    0.02    0.02
   0  -5   3   -0.01    0.02
   0   5  -3    0.03    0.02
   0   5  -3    0.01    0.04
   3   0  -5    0.00    0.02
   3   0  -5   -0.02    0.04
  -1   5   0   -0.02    0.03
   5   0   1    0.06    0.03
  -1   5   0    0.00    0.02
  -5   0  -1   -0.01    0.03
  -5   0  -1    0.03    0.03
  -5   0  -1    0.00    0.02
  -5   0   1   -0.03    0.02
  -5   0   1    0.01    0.02
  -1  -5   0    0.01    0.02
  -1  -5   0    0.01    0.03
  -1   5   0   -0.01    0.02
  -1   5   0    0.04    0.03
   0   1  -5   -0.08    0.04
   0   1  -5   -0.02    0.04
   0   1   5   -0.01    0.02
   0   1   5    0.00    0.02
   0   1   5   -0.02    0.02
   1   5   0    0.00    0.02
   1   5   0   -0.02    0.02
   1   5   0   -0.01    0.03
   5   0  -1    0.02    0.03
   5   0  -1   -0.01    0.03
   5   0  -1    0.00    0.03
   5   0   1    0.03    0.03
   5   0   1    0.02    0.01
   0  -1  -5   -0.04    0.04
   0  -1  -5    0.00    0.03
   0  -1   5   -0.05    0.02
   0   1  -5    0.03    0.02
  -5   2   1    0.03    0.02
  -2  -1  -5   -0.01    0.03
  -5  -2  -1    0.06    0.02
   5  -2   1    0.02    0.02
   5   2  -1    0.05    0.04
   5   2  -1    0.03    0.04
   5   2  -1    0.04    0.03
   2  -1   5    0.02    0.02
  -2   1   5    0.00    0.02
  -2   1   5   -0.01    0.03
  -1  -5  -2    0.08    0.02
  -1  -5  -2    0.03    0.03
   1   5  -2    0.09    0.04
   1   5  -2    0.01    0.02
   2  -1   5    0.03    0.02
  -5   2   1    0.05    0.02
   2   1  -5    0.03    0.02
  -5  -2  -1    0.03    0.04
  -1   5   2    0.01    0.02
  -1   5   2    0.03    0.03
  -1   5   2    0.00    0.02
  -1   5   2   -0.03    0.03
   1  -5   2    0.01    0.03
   1  -5   2    0.00    0.02
   5  -2   1    0.05    0.03
   2   1  -5    0.07    0.03
  -2  -1  -5    0.06    0.04
  -5   2   1    0.00    0.03
   2   1  -5    0.01    0.04
  -2  -1  -5    0.03    0.03
  -5  -2  -1    0.07    0.03
   1   5   2    0.06    0.02
  -1  -5   2    0.06    0.03
  -2  -1   5    0.02    0.02
   1   5   2    0.03    0.03
  -1  -5   2    0.06    0.03
   2  -1  -5    0.07    0.04
   2  -1  -5    0.04    0.03
  -1  -5   2    0.03    0.03
   5   2   1    0.14    0.04
  -1   5  -2   -0.03    0.03
  -1   5  -2    0.01    0.02
  -5  -2   1    0.00    0.03
  -5  -2   1    0.07    0.03
   2   1   5    0.06    0.03
   5  -2  -1    0.08    0.02
  -5  -2   1    0.02    0.02
  -5   2  -1    0.04    0.03
  -5   2  -1    0.05    0.03
   5   2   1    0.05    0.02
   1   5   2    0.03    0.03
  -1   5  -2    0.08    0.02
  -2   1  -5    0.03    0.03
   5  -2  -1    0.02    0.03
   5   2   1   -0.01    0.03
   2   1   5    0.04    0.02
  -2  -1   5    0.04    0.03
  -2   1  -5    0.03    0.04
  -5   4   1    0.57    0.04
  -5   4   1    0.54    0.04
  -4   1   5    0.46    0.04
  -1  -5  -4    0.62    0.05
  -4   1   5    0.48    0.04
   4  -1   5    0.61    0.04
   4   1  -5    0.57    0.04
   4   1  -5    0.48    0.06
   4   1  -5    0.59    0.05
  -5   4   1    0.55    0.06
   5   4  -1    0.62    0.06
   5  -4   1    0.47    0.04
   5   4  -1    0.64    0.05
  -4  -1  -5    0.60    0.05
  -4  -1  -5    0.61    0.06
  -1  -5  -4    0.67    0.05
  -5  -4  -1    0.62    0.06
   4  -1   5    0.63    0.05
   1   5  -4    0.47    0.04
   1   5  -4    0.45    0.06
   5  -4   1    0.54    0.03
  -1   5   4    0.57    0.05
   1  -5   4    0.56    0.04
   1  -5   4    0.57    0.05
  -1   5   4    0.60    0.04
  -1  -5  -4    0.54    0.05
  -1   5   4    0.50    0.05
  -5  -4  -1    0.59    0.06
  -1  -5   4    0.49    0.04
  -1   5  -4    0.62    0.07
  -4   1  -5    0.59    0.06
  -1   5  -4    0.56    0.04
  -5   4  -1    0.51    0.06
   1  -5  -4    0.61    0.05
   1  -5  -4    0.47    0.04
  -5  -4   1    0.63    0.05
   4   1   5    0.55    0.05
  -4  -1   5    0.61    0.04
  -1  -5   4    0.50    0.05
  -5  -4   1    0.62    0.06
  -5  -4   1    0.49    0.05
  -5   4  -1    0.46    0.04
   1   5   4    0.60    0.05
   5  -4  -1    0.61    0.04
   5   4   1    0.64    0.06
   4  -1  -5    0.54    0.06
  -4  -1   5    0.55    0.05
   5  -4  -1    0.58    0.05
   4   1   5    0.60    0.05
   4  -1  -5    0.51    0.04
   4  -1  -5    0.46    0.05
   1   5   4    0.54    0.05
   5   4   1    0.56    0.04
   5   4   1    0.57    0.05
  -4   1  -5    0.70    0.06
   5  -1   2    0.00    0.03
  -2  -5  -1    0.01    0.03
   5  -1   2    0.04    0.03
  -2   5   1    0.04    0.02
   1   2  -5    0.01    0.03
  -1  -2  -5    0.06    0.03
  -5  -1  -2    0.05    0.03
  -2  -5  -1    0.06    0.02
   1  -2   5    0.02    0.02
   1   2  -5    0.00    0.02
   1   2  -5    0.03    0.04
  -1  -2  -5    0.07    0.04
  -2   5   1    0.04    0.02
  -2   5   1    0.02    0.03
  -1   2   5    0.01    0.02
  -2   5   1   -0.02    0.03
   5   1  -2    0.00    0.04
  -5   1   2    0.03    0.02
  -5   1   2    0.03    0.02
   5  -1   2    0.02    0.01
   2   5  -1    0.01    0.03
   2   5  -1    0.02    0.03
  -2  -5  -1    0.02    0.03
  -1  -2  -5    0.03    0.04
  -5  -1  -2    0.03    0.02
  -5  -1  -2    0.00    0.03
   5   1  -2    0.10    0.04
  -1   2   5    0.02    0.03
   5   1  -2    0.04    0.03
  -1  -2   5    0.02    0.03
  -1   2  -5   -0.01    0.04
  -1   2  -5    0.05    0.03
   5   1   2    0.07    0.04
  -5   1  -2    0.00    0.02
  -2   5  -1    0.05    0.02
  -2   5  -1    0.00    0.02
   5  -1  -2    0.03    0.03
   5  -1  -2    0.07    0.03
   5  -1  -2    0.05    0.03
  -5  -1   2    0.04    0.02
  -2   5  -1    0.04    0.03
  -2   5  -1    0.02    0.02
   1   2   5    0.01    0.02
   1   2   5    0.01    0.03
   5   1   2    0.01    0.03
  -1   2  -5    0.04    0.02
   2   5   1    0.07    0.03
  -2  -5   1    0.01    0.03
   2   5   1    0.04    0.02
  -2  -5   1    0.00    0.03
  -1  -2   5    0.04    0.02
  -5  -1   2    0.05    0.03
   1  -2  -5    0.03    0.04
  -5   1  -2   -0.04    0.03
  -5   1  -2    0.00    0.03
   1  -2  -5    0.05    0.03
   5   1   2    0.04    0.02
   2   5   1    0.07    0.03
  -5   3   2    0.08    0.03
  -2   5   3    0.01    0.02
  -3  -2  -5   -0.04    0.03
  -2  -5  -3    0.03    0.03
   5   3  -2    0.12    0.04
   2   5  -3    0.01    0.04
   2   5  -3    0.01    0.02
   2  -5   3    0.05    0.02
   5  -3   2    0.05    0.01
  -2   5   3    0.02    0.02
  -3  -2  -5    0.15    0.05
  -3  -2  -5   -0.03    0.03
   3   2  -5    0.01    0.02
   5   3  -2    0.09    0.04
   5  -3   2    0.05    0.02
  -2  -5  -3    0.04    0.03
  -3   2   5    0.05    0.02
  -3   2   5    0.04    0.03
  -5  -3  -2    0.02    0.02
  -5   3   2    0.03    0.02
  -2   5   3    0.03    0.03
  -5  -3  -2    0.05    0.04
   2  -5   3    0.04    0.02
   3  -2   5    0.10    0.03
   3  -2   5    0.00    0.02
  -5   3   2    0.03    0.03
   3   2  -5    0.00    0.04
   3   2  -5    0.04    0.03
  -5  -3  -2    0.06    0.04
   3   2   5    0.05    0.03
   3   2   5    0.02    0.02
   3   2   5    0.00    0.03
  -2   5  -3    0.03    0.01
  -5  -3   2    0.03    0.03
  -5  -3   2    0.00    0.02
  -5   3  -2    0.07    0.04
  -5   3  -2    0.05    0.02
  -3  -2   5    0.03    0.02
  -2   5  -3   -0.01    0.04
   3  -2  -5    0.00    0.03
   5  -3  -2    0.04    0.02
   5  -3  -2    0.01    0.03
   2  -5  -3    0.03    0.03
  -3   2  -5   -0.01    0.03
  -3  -2   5    0.03    0.03
   3  -2  -5    0.02    0.04
   5   3   2    0.08    0.04
   5   3   2    0.00    0.03
   5   3   2    0.02    0.03
   2   5   3    0.02    0.03
  -2   5  -3    0.06    0.02
  -2  -5   3    0.04    0.03
   3  -2  -5   -0.01    0.02
  -5  -3   2    0.03    0.03
   2   5   3    0.04    0.03
  -3   2  -5    0.01    0.04
  -2  -5   3    0.06    0.02
  -2  -5   3    0.03    0.03
  -3   5   0    0.01    0.03
  -3  -5   0   -0.03    0.03
  -5   0   3   -0.01    0.02
  -3  -5   0   -0.02    0.04
  -5   0   3    0.01    0.02
   3   5   0    0.01    0.03
   3   5   0   -0.03    0.02
   3   5   0   -0.03    0.03
   5   0  -3    0.04    0.03
   5   0  -3    0.06    0.04
   5   0  -3    0.01    0.03
   5   0   3   -0.01    0.03
   5   0   3    0.03    0.02
   5   0   3   -0.01    0.02
   0   3  -5    0.04    0.01
   0   3  -5    0.02    0.04
  -3   5   0   -0.01    0.02
  -3   5   0   -0.02    0.02
  -3   5   0    0.01    0.02
  -5   0  -3    0.02    0.03
  -5   0  -3    0.00    0.03
  -5   0  -3    0.02    0.02
   0  -3  -5    0.03    0.03
   0  -3  -5    0.03    0.03
   0  -3   5    0.00    0.02
   0   3  -5    0.00    0.02
   0   3   5   -0.03    0.02
   0   3   5    0.00    0.03
   0   3   5    0.00    0.02
  -3  -5  -2    0.05    0.04
   5  -2   3    0.05    0.02
  -3  -5  -2    0.03    0.04
   2   3  -5    0.03    0.02
   2   3  -5    0.02    0.04
   2   3  -5    0.05    0.03
  -5  -2  -3    0.04    0.02
   3   5  -2    0.01    0.03
  -5  -2  -3    0.02    0.03
  -3   5   2    0.06    0.03
  -3   5   2    0.01    0.02
  -2  -3  -5    0.05    0.03
  -5  -2  -3    0.05    0.04
   5   2  -3    0.02    0.03
   5   2  -3    0.06    0.04
  -3  -5  -2    0.04    0.03
   3   5  -2    0.05    0.03
  -5   2   3    0.02    0.02
  -5   2   3    0.02    0.02
   2  -3   5    0.04    0.02
  -3   5   2    0.03    0.03
  -2  -3  -5    0.02    0.03
  -2  -3  -5    0.06    0.04
   5  -2   3    0.07    0.03
  -2   3   5    0.00    0.03
  -2   3   5    0.01    0.02
   3  -5   2    0.04    0.02
  -3   5   2    0.05    0.02
  -5  -2   3    0.05    0.02
  -2  -3   5   -0.01    0.03
  -2  -3   5    0.02    0.01
   2   3   5    0.10    0.03
   3   5   2    0.00    0.03
  -5   2  -3    0.02    0.04
  -2   3  -5    0.04    0.02
   2  -3  -5    0.06    0.04
   2  -3  -5    0.01    0.02
   5   2   3    0.04    0.04
   5   2   3    0.04    0.03
   5   2   3    0.05    0.02
  -3  -5   2    0.19    0.03
  -3  -5   2    0.04    0.03
  -3  -5   2    0.01    0.03
  -3   5  -2    0.04    0.02
  -3   5  -2    0.04    0.04
  -3   5  -2    0.01    0.02
  -5  -2   3    0.03    0.02
  -5   2  -3    0.03    0.03
   2  -3  -5    0.02    0.03
   2   3   5    0.04    0.03
  -2   3  -5    0.00    0.04
   3   5   2    0.01    0.03
   5  -2  -3    0.02    0.02
   5  -2  -3    0.03    0.03
   5  -2  -3    0.08    0.04
  -4  -3  -5    0.09    0.04
  -4  -3  -5    0.05    0.04
   5  -4   3    0.11    0.03
   5  -4   3    0.15    0.02
   5   4  -3    0.11    0.04
   5   4  -3    0.13    0.04
  -3  -5  -4    0.09    0.04
  -3  -5  -4    0.05    0.04
   3   5  -4    0.18    0.05
   3   5  -4    0.11    0.03
   4  -3   5    0.10    0.03
  -5   4   3    0.11    0.03
   4  -3   5    0.13    0.02
  -3   5   4    0.14    0.02
  -5   4   3    0.11    0.03
  -5  -4  -3    0.11    0.02
  -5  -4  -3    0.05    0.05
  -5  -4  -3    0.05    0.04
   3  -5   4    0.11    0.02
   3  -5   4    0.14    0.03
  -4   3   5    0.10    0.03
  -4   3   5    0.18    0.03
  -3  -5  -4    0.12    0.02
   4   3  -5    0.11    0.03
   4   3  -5    0.09    0.05
  -4  -3  -5    0.06    0.03
  -3   5   4    0.09    0.03
   3   5  -4    0.16    0.03
   4   3  -5    0.14    0.03
  -3   5   4    0.18    0.03
  -3  -5   4    0.12    0.03
   5  -4  -3    0.08    0.04
  -3   5  -4    0.13    0.03
  -3   5  -4    0.08    0.04
   4   3   5    0.13    0.04
  -4  -3   5    0.13    0.02
   4   3   5    0.07    0.03
   5  -4  -3    0.14    0.02
   4  -3  -5    0.10    0.04
   4  -3  -5    0.16    0.04
  -4  -3   5    0.09    0.03
  -4   3  -5    0.08    0.04
  -4   3  -5    0.14    0.03
   4   3   5    0.11    0.02
  -5   4  -3    0.05    0.04
  -5   4  -3    0.14    0.03
   5   4   3    0.07    0.04
   5   4   3    0.05    0.03
   3   5   4    0.11    0.04
   4  -3  -5    0.18    0.02
  -5  -4   3    0.12    0.03
  -3  -5   4    0.12    0.03
   3   5   4    0.05    0.04
   3  -5  -4    0.11    0.04
  -3   5  -4    0.13    0.02
   5  -4  -3    0.11    0.03
  -5  -4   3    0.10    0.03
   5   4   3    0.12    0.04
   3  -5  -4    0.19    0.03
  -3  -5   4    0.13    0.02
  -5  -4   3    0.12    0.03
   1  -4   5    0.49    0.04
  -5   1   4    0.59    0.04
   5  -1   4    0.53    0.05
  -5   1   4    0.54    0.04
   1   4  -5    0.48    0.06
  -4   5   1    0.50    0.05
   5   1  -4    0.50    0.05
   5   1  -4    0.44    0.06
  -1  -4  -5    0.59    0.05
  -1  -4  -5    0.56    0.05
  -1  -4  -5    0.58    0.05
   5  -1   4    0.61    0.04
  -1   4   5    0.61    0.05
   5   1  -4    0.49    0.06
  -5  -1  -4    0.67    0.05
  -5  -1  -4    0.51    0.06
  -4   5   1    0.53    0.04
  -4   5   1    0.50    0.05
  -4   5   1    0.50    0.04
   4   5  -1    0.69    0.05
   4   5  -1    0.58    0.06
  -5  -1  -4    0.64    0.05
   1   4  -5    0.62    0.05
  -1   4   5    0.66    0.04
  -4  -5  -1    0.52    0.06
  -4  -5  -1    0.53    0.06
  -1   4   5    0.64    0.05
   1  -4  -5    0.60    0.05
   4   5   1    0.59    0.06
   4   5   1    0.54    0.05
   5  -1  -4    0.60    0.04
   5  -1  -4    0.47    0.06
   5  -1  -4    0.57    0.06
  -4  -5   1    0.57    0.06
  -1  -4   5    0.60    0.05
  -4  -5   1    0.63    0.06
   5   1   4    0.60    0.05
  -4   5  -1    0.55    0.04
  -4   5  -1    0.57    0.04
   5   1   4    0.64    0.05
  -5  -1   4    0.54    0.04
  -5  -1   4    0.50    0.04
  -5   1  -4    0.76    0.06
  -5   1  -4    0.60    0.05
  -5   1  -4    0.63    0.04
   5   1   4    0.59    0.05
   1   4   5    0.58    0.05
   1   4   5    0.58    0.05
  -1   4  -5    0.50    0.04
  -4   5  -1    0.73    0.05
  -4   5  -1    0.61    0.06
   1  -4  -5    0.66    0.04
   1  -4  -5    0.71    0.06
  -4  -5   1    0.59    0.05
  -1   4  -5    0.44    0.06
   3   4  -5    0.17    0.03
  -5   3   4    0.10    0.03
  -5   3   4    0.15    0.03
   5  -3   4    0.11    0.03
   5  -3   4    0.11    0.02
   5   3  -4    0.18    0.03
   5   3  -4    0.16    0.05
  -3  -4  -5    0.09    0.04
  -4   5   3    0.15    0.03
  -3  -4  -5    0.09    0.03
   3   4  -5    0.11    0.05
   3   4  -5    0.12    0.03
  -5  -3  -4    0.10    0.03
   4  -5   3    0.15    0.02
   4   5  -3    0.11    0.03
   4   5  -3    0.12    0.04
  -4  -5  -3    0.11    0.04
  -4  -5  -3    0.09    0.04
  -4  -5  -3    0.04    0.04
  -4   5   3    0.12    0.03
   3  -4   5    0.14    0.03
   3  -4   5    0.15    0.03
  -5  -3  -4    0.03    0.04
  -5  -3  -4    0.11    0.04
  -4   5   3    0.12    0.04
  -3  -4  -5    0.11    0.04
  -3   4   5    0.14    0.03
  -3   4   5    0.11    0.03
  -4  -5   3    0.18    0.03
   5   3   4    0.10    0.04
  -3  -4   5    0.16    0.02
  -3  -4   5    0.08    0.03
  -3   4  -5    0.07    0.04
  -3   4  -5    0.11    0.02
   5   3   4    0.08    0.03
   5   3   4    0.13    0.03
   3  -4  -5    0.10    0.03
   3  -4  -5    0.13    0.04
  -4  -5   3    0.13    0.04
  -4  -5   3    0.16    0.03
   4   5   3    0.14    0.04
   4   5   3    0.09    0.04
   5  -3  -4    0.14    0.02
   3   4   5    0.08    0.04
   3   4   5    0.10    0.03
   4  -5  -3    0.16    0.03
  -4   5  -3    0.08    0.04
  -4   5  -3    0.12    0.02
  -5  -3   4    0.17    0.03
  -5  -3   4    0.10    0.03
  -5   3  -4    0.08    0.04
  -5   3  -4    0.09    0.03
   5  -3  -4    0.14    0.04
   5  -3  -4    0.12    0.04
  -5  -5   0    0.05    0.04
  -5  -5   0    0.04    0.04
  -5   0  -5    0.00    0.03
  -5   0  -5    0.02    0.04
  -5   0  -5   -0.03    0.02
  -5   0   5    0.00    0.02
  -5   0   5    0.03    0.02
  -5   5   0    0.07    0.04
  -5   5   0   -0.01    0.02
  -5   5   0    0.01    0.02
   0  -5  -5    0.00    0.01
   0  -5  -5    0.00    0.03
   0  -5  -5    0.02    0.03
   0  -5   5    0.01    0.02
   0  -5   5    0.03    0.03
   0   5  -5   -0.02    0.02
   0   5  -5    0.02    0.04
   0   5   5   -0.01    0.02
   0   5   5   -0.01    0.03
   0   5   5    0.04    0.03
   5  -5   0   -0.01    0.02
   5   0  -5    0.01    0.02
   5   0  -5    0.04    0.04
   5   0  -5   -0.03    0.04
   5   0   5    0.00    0.03
   5   0   5    0.00    0.02
   5   5   0    0.03    0.04
   5   5   0    0.00    0.03
   5   5   0    0.01    0.03
  -5  -5  -2    3.75    0.17
   5   2  -5    3.35    0.14
   5   2  -5    3.50    0.16
   5   2  -5    3.66    0.14
  -5  -2  -5    3.71    0.14
  -5  -2  -5    3.34    0.16
  -5  -2  -5    3.83    0.15
   5   5  -2    3.14    0.15
   5   5  -2    3.24    0.15
   2   5  -5    3.18    0.16
   5  -2   5    3.34    0.13
  -2  -5  -5    3.78    0.15
  -5   2   5    3.56    0.14
  -5   2   5    3.54    0.14
   5  -5   2    3.51    0.13
  -5   5   2    3.62    0.16
  -5   5   2    3.58    0.14
  -5   5   2    3.57    0.14
  -2  -5  -5    3.68    0.14
  -2   5   5    3.35    0.15
  -2  -5  -5    3.45    0.15
   2   5  -5    3.48    0.14
  -2   5   5    3.30    0.14
   2  -5   5    3.72    0.14
  -2   5   5    3.45    0.13
  -2   5  -5    3.69    0.12
  -2  -5   5    3.44    0.14
  -5   2  -5    3.39    0.13
   2  -5  -5    3.29    0.13
   2  -5  -5    3.13    0.15
   2  -5  -5    3.15    0.14
  -2   5  -5    3.69    0.17
  -2  -5   5    3.56    0.12
  -5   2  -5    3.31    0.16
   2   5   5    3.57    0.15
   2   5   5    3.47    0.15
   5  -5  -2    3.76    0.13
   5  -5  -2    3.49    0.15
  -5   5  -2    3.65    0.14
   5  -2  -5    3.83    0.13
   5  -2  -5    3.73    0.15
   5  -2  -5    3.42    0.16
  -5   2  -5    3.37    0.14
  -5  -5   2    3.17    0.14
  -5  -5   2    3.30    0.15
  -5  -5   2    3.22    0.15
   5   2   5    3.69    0.15
   5   2   5    3.76    0.14
   5   2   5    3.50    0.14
  -5  -2   5    3.55    0.14
  -5  -2   5    3.50    0.14
   5   5   2    3.68    0.16
   5   5   2    3.69    0.15
  -5  -5  -4    0.07    0.05
  -5  -5  -4   -0.02    0.03
   4   5  -5    0.03    0.02
   5  -4   5    0.00    0.02
   5  -4   5    0.01    0.02
  -5  -4  -5   -0.01    0.02
  -5  -4  -5    0.04    0.04
  -5  -4  -5    0.00    0.03
   5  -5   4    0.01    0.03
   5  -5   4    0.03    0.02
   5   5  -4   -0.01    0.02
   5   5  -4    0.02    0.03
  -5   4   5    0.01    0.02
  -5   4   5    0.00    0.03
   4   5  -5    0.00    0.03
   5   4  -5    0.01    0.03
  -5   5   4    0.01    0.03
  -5   5   4    0.03    0.03
  -4  -5  -5   -0.01    0.02
  -4  -5  -5    0.02    0.04
  -4  -5  -5    0.06    0.04
  -4   5   5   -0.02    0.02
   5   5  -4   -0.03    0.04
   4  -5   5   -0.02    0.02
   5   4  -5    0.00    0.04
   5   4  -5    0.03    0.02
  -4   5   5    0.01    0.03
   4   5  -5    0.02    0.05
   4  -5   5    0.02    0.02
   4  -5  -5   -0.01    0.03
  -4  -5   5   -0.01    0.02
  -5   4  -5   -0.01    0.04
  -5   5  -4    0.03    0.04
   4  -5  -5    0.00    0.01
  -5  -5   4    0.00    0.02
   4   5   5    0.04    0.04
   4  -5  -5   -0.02    0.03
   5  -5  -4    0.06    0.02
   5  -5  -4    0.00    0.03
   5  -5  -4    0.03    0.04
  -5  -4   5   -0.02    0.02
  -5  -4   5    0.02    0.03
   5  -4  -5   -0.01    0.02
   5  -4  -5    0.00    0.03
   5  -4  -5    0.07    0.04
  -5  -5   4    0.00    0.03
  -5  -5   4    0.03    0.03
  -5   5  -4    0.01    0.02
  -4   5  -5    0.00    0.02
   4   5   5    0.02    0.03
   5   4   5   -0.04    0.04
   5   4   5   -0.01    0.02
   5   4   5    0.00    0.03
  -5   4  -5    0.02    0.02
  -4  -5   5    0.01    0.03
  -4   5  -5    0.04    0.04
   5   5   4   -0.04    0.04
   5   5   4    0.03    0.03
  -6   0   0    0.01    0.03
  -6   0   0   -0.03    0.02
  -6   0   0    0.03    0.01
   0   0  -6    0.06    0.04
   0   0  -6   -0.01    0.04
   0   0   6    0.01    0.02
   0   0   6    0.02    0.02
   0   0   6    0.03    0.03
   0   6   0    0.00    0.02
   0   6   0    0.01    0.03
   0   6   0   -0.02    0.03
   6   0   0    0.00    0.03
   6   0   0   -0.02    0.03
   2   0  -6   40.79    1.27
   2   0  -6   38.49    1.30
   2   0  -6   37.59    1.29
   2   0   6   39.29    1.28
   2   0   6   39.07    1.28
   6  -2   0   38.26    1.28
   6  -2   0   38.75    1.29
   6   2   0   37.78    1.29
   6   2   0   37.39    1.29
   6   2   0   38.07    1.28
   0   6   2   38.42    1.28
   0   6   2   39.07    1.28
   0   6   2   37.97    1.28
  -6  -2   0   36.61    1.29
  -6  -2   0   38.11    1.29
  -6  -2   0   39.79    1.28
  -6   2   0   38.03    1.30
  -6   2   0   39.19    1.29
  -2   0  -6   38.06    1.30
  -2   0  -6   38.20    1.30
  -2   0  -6   38.89    1.29
  -2   0   6   39.92    1.28
  -2   0   6   37.14    1.28
   0  -6  -2   37.96    1.28
   0  -6   2   38.24    1.27
   0  -6   2   37.46    1.29
   0  -6   2   38.24    1.29
   0   6  -2   38.38    1.29
   0   6   2   38.70    1.30
   0  -6   4    0.04    0.03
   0   6  -4    0.02    0.02
   0  -6   4    0.08    0.03
  -6  -4   0   -0.01    0.03
  -6   4   0    0.03    0.04
  -6   4   0    0.05    0.03
  -6   4   0    0.04    0.02
  -4   0  -6    0.03    0.04
  -4   0  -6    0.10    0.04
  -4   0   6    0.02    0.02
  -4   0   6    0.05    0.03
   0  -6  -4    0.07    0.03
   0  -6  -4    0.05    0.03
   4   0  -6    0.05    0.03
   4   0   6    0.06    0.03
   4   0   6    0.07    0.03
   6  -4   0    0.03    0.02
   6  -4   0    0.05    0.03
   6   4   0    0.02    0.04
   6   4   0    0.08    0.03
   4   0  -6    0.02    0.01
   4   0  -6    0.01    0.04
   0   6   4    0.05    0.03
  -6  -4   0    0.03    0.04
   0   6  -4    0.02    0.04
   0   6   4    0.08    0.02
   0   6   4    0.02    0.03
  -1   6   1   10.71    0.37
   1  -1   6   10.81    0.37
  -1   6   1   10.86    0.37
   6  -1   1   10.91    0.38
  -1   6   1   10.82    0.37
  -1   1   6   10.85    0.37
  -1   1   6   10.44    0.37
  -6   1   1   10.17    0.38
  -6   1   1   10.43    0.37
  -6   1   1   10.38    0.35
  -1  -6  -1   10.59    0.36
  -1  -6  -1   10.26    0.37
   1   1  -6   10.65    0.36
   1   1  -6    9.91    0.39
  -1  -1  -6   11.26    0.38
  -1   1   6   10.85    0.35
   1   1  -6   10.01    0.38
  -1  -1  -6   10.57    0.38
  -1  -1  -6   10.66    0.37
   1   6  -1   10.34    0.37
   1   6  -1   10.96    0.37
   1   6  -1   10.41    0.38
  -6  -1  -1   10.40    0.37
  -6  -1  -1   10.79    0.37
   1  -1   6   10.50    0.36
   6   1  -1   10.84    0.37
   6  -1   1   11.09    0.37
   6   1  -1   10.20    0.38
   6   1  -1   10.24    0.38
  -1   6   1   10.74    0.38
   1   1   6   11.01    0.36
   6  -1  -1   10.38    0.38
   6  -1  -1   10.28    0.37
   1   6   1   10.28    0.37
   1   6   1   10.92    0.36
  -1   6  -1    9.94    0.37
  -1  -6   1   10.72    0.37
  -1  -6   1   10.80    0.38
  -1   6  -1   10.40    0.37
   1   1   6   10.48    0.37
   6   1   1   10.71    0.38
   6   1   1   10.46    0.38
  -1  -1   6   10.40    0.36
  -6   1  -1   10.78    0.37
  -1   1  -6   10.59    0.39
  -1   1  -6   10.76    0.37
  -1   6  -1   10.58    0.36
  -6   1  -1   10.99    0.38
  -6  -1   1   10.81    0.36
   6   1   1   10.37    0.36
  -1  -1   6   10.25    0.37
  -6  -1   1   10.71    0.37
  -1   6  -1   10.11    0.38
   1  -1  -6   10.36    0.38
   1  -1  -6   10.65    0.38
   1  -6   3    1.23    0.07
   1   6  -3    1.06    0.06
   6  -3   1    0.98    0.07
   6   3  -1    0.98    0.08
   1  -6   3    1.02    0.06
   6   3  -1    1.09    0.07
   6  -3   1    0.96    0.06
   3   1  -6    1.18    0.07
  -6  -3  -1    0.96    0.08
   6   3  -1    1.06    0.09
  -3  -1  -6    0.87    0.08
  -3  -1  -6    1.24    0.08
   3  -1   6    0.98    0.06
   3  -1   6    1.07    0.06
  -6   3   1    1.12    0.08
  -6   3   1    1.13    0.06
  -3   1   6    0.98    0.06
  -3   1   6    0.98    0.06
  -1   6   3    1.03    0.06
  -1   6   3    0.95    0.07
  -1   6   3    1.01    0.06
  -1   6   3    0.98    0.07
   3   1  -6    0.91    0.08
  -3  -1  -6    1.03    0.07
  -6   3   1    1.05    0.05
   1   6  -3    0.97    0.08
   3   1  -6    1.07    0.05
  -6  -3  -1    1.09    0.08
  -1  -6  -3    1.08    0.06
  -1  -6  -3    1.07    0.06
  -1  -6  -3    1.00    0.07
   6  -3  -1    1.17    0.06
   1   6   3    0.97    0.07
   6   3   1    0.95    0.08
  -1   6  -3    1.16    0.06
  -1   6  -3    1.08    0.08
  -1   6  -3    1.09    0.05
   6  -3  -1    1.16    0.08
  -3  -1   6    1.06    0.05
   3   1   6    0.97    0.06
   3   1   6    1.04    0.06
  -6  -3   1    1.02    0.07
  -6  -3   1    1.06    0.07
  -6  -3   1    1.10    0.06
   6   3   1    0.84    0.07
  -6   3  -1    0.94    0.06
  -3   1  -6    1.01    0.08
  -3   1  -6    1.03    0.08
   6   3   1    1.03    0.06
  -3  -1   6    1.03    0.07
   3  -1  -6    0.90    0.08
   3  -1  -6    0.89    0.07
  -1  -6   3    0.99    0.07
  -1  -6   3    1.02    0.07
  -6   3  -1    0.87    0.08
   1   6   3    1.05    0.08
  -1  -6   3    0.99    0.06
   6   3   1    0.95    0.06
  -6  -5  -1    1.31    0.09
  -5  -1  -6    1.31    0.08
  -5   1   6    1.31    0.07
   1  -6   5    1.41    0.07
  -1   6   5    1.44    0.08
  -6   5   1    1.27    0.09
  -1   6   5    1.35    0.06
   5  -1   6    1.43    0.07
   6   5  -1    1.22    0.08
  -1  -6  -5    1.49    0.08
  -1  -6  -5    1.42    0.08
   5  -1   6    1.28    0.08
  -6  -5  -1    1.41    0.10
  -1   6   5    1.32    0.09
   6  -5   1    1.40    0.06
  -5   1   6    1.36    0.08
   1   6  -5    1.29    0.10
   1   6  -5    1.41    0.08
  -6   5   1    1.44    0.07
   5   1  -6    1.41    0.07
  -6   5   1    1.51    0.08
   1  -6   5    1.48    0.08
  -1  -6  -5    1.48    0.08
  -5  -1  -6    1.27    0.10
   6  -5   1    1.35    0.07
   5   1  -6    1.42    0.10
   5   1  -6    1.61    0.08
   6   5  -1    1.32    0.09
   1  -6  -5    1.20    0.08
  -6  -5   1    1.42    0.08
   1   6   5    1.51    0.08
  -6   5  -1    1.32    0.07
  -5  -1   6    1.52    0.07
   1  -6  -5    1.32    0.06
  -6   5  -1    1.27    0.09
  -1  -6   5    1.41    0.08
  -1   6  -5    1.53    0.10
  -5   1  -6    1.41    0.07
  -5   1  -6    1.39    0.09
  -5   1  -6    1.38    0.09
   5   1   6    1.33    0.08
   5   1   6    1.40    0.07
   5   1   6    1.40    0.07
   6  -5  -1    1.47    0.07
   6  -5  -1    1.41    0.08
   5  -1  -6    1.37    0.06
  -6  -5   1    1.37    0.09
   5  -1  -6    1.39    0.10
  -5  -1   6    1.40    0.08
   6   5   1    1.31    0.08
   1   6   5    1.29    0.09
   5  -1  -6    1.37    0.10
  -1  -6   5    1.41    0.07
   6   5   1    1.50    0.10
   1  -6  -5    1.36    0.08
   6   5   1    1.35    0.06
  -6  -5   1    1.28    0.09
   0   2  -6   36.29    1.30
   0   2  -6   38.14    1.27
   0   2  -6   40.18    1.28
   0   2   6   37.66    1.28
   2   6   0   37.35    1.29
   2   6   0   39.20    1.28
  -6   0  -2   39.20    1.28
  -2  -6   0   38.75    1.27
  -2  -6   0   38.46    1.29
  -2  -6   0   38.52    1.29
   6   0  -2   36.99    1.29
   6   0   2   38.03    1.29
   6   0   2   38.30    1.28
   0   2  -6   36.15    1.29
   6   0  -2   37.37    1.29
   0   2   6   39.10    1.27
  -6   0  -2   38.27    1.29
   6   0   2   38.78    1.27
  -2   6   0   38.11    1.28
   0  -2  -6   38.58    1.29
   0  -2  -6   38.50    1.29
   0  -2   6   38.47    1.28
  -2   6   0   38.65    1.29
  -6   0   2   39.12    1.28
   2   6   0   38.12    1.29
   6   0  -2   38.11    1.28
  -2   6   0   39.24    1.28
  -2   6   0   38.71    1.28
  -6   0   2   38.98    1.27
  -6   2   2    0.34    0.05
   2   2  -6    0.34    0.06
  -4  -2  -6    0.47    0.05
   2  -6   4    0.59    0.04
  -2  -6  -4    0.47    0.05
   4  -2   6    0.51    0.05
  -2   6   4    0.47    0.05
  -4   2   6    0.52    0.05
   2  -6   4    0.62    0.05
  -2  -6  -4    0.49    0.05
  -4  -2  -6    0.38    0.06
   6  -4   2    0.44    0.03
  -6   4   2    0.56    0.06
  -4   2   6    0.46    0.04
  -2   6   4    0.50    0.04
   2   6  -4    0.41    0.06
   6   4  -2    0.54    0.06
  -6  -4  -2    0.50    0.06
  -6  -4  -2    0.62    0.06
  -2   6   4    0.53    0.05
   6  -4   2    0.44    0.04
  -2  -6  -4    0.52    0.04
  -6   4   2    0.55    0.05
  -6   4   2    0.60    0.04
   4  -2   6    0.54    0.04
   4   2  -6    0.52    0.04
   4   2  -6    0.63    0.07
   4   2  -6    0.54    0.05
   6   4  -2    0.51    0.05
   2   6  -4    0.51    0.05
   2   6   4    0.38    0.05
   4  -2  -6    0.51    0.05
   4   2   6    0.64    0.04
   2  -6  -4    0.49    0.05
  -6   4  -2    0.49    0.04
   2   6   4    0.52    0.05
  -4  -2   6    0.49    0.04
   6   4   2    0.52    0.06
   6   4   2    0.36    0.05
   4   2   6    0.49    0.05
  -4  -2   6    0.61    0.05
  -6  -4   2    0.44    0.05
  -2  -6   4    0.44    0.05
  -2  -6   4    0.45    0.05
  -2   6  -4    0.51    0.05
  -2   6  -4    0.47    0.06
  -2   6  -4    0.58    0.03
  -4   2  -6    0.52    0.05
  -6  -4   2    0.57    0.05
  -6   4  -2    0.47    0.06
   4  -2  -6    0.51    0.05
   6  -4  -2    0.48    0.05
   4  -2  -6    0.56    0.06
   4   2   6    0.46    0.05
   6  -4  -2    0.61    0.04
  -4   2  -6    0.52    0.06
   6   4   2    0.45    0.05
  -6  -4   2    0.54    0.05
   6  -1   3    1.12    0.05
   6  -1   3    1.00    0.07
   1   3  -6    0.91    0.08
   6  -1   3    0.99    0.06
  -3   6   1    0.99    0.06
  -3   6   1    1.02    0.07
   1   3  -6    1.14    0.08
  -1   3   6    0.84    0.07
   6   1  -3    0.96    0.07
  -6  -1  -3    0.92    0.08
  -6  -1  -3    1.03    0.07
  -1  -3  -6    1.08    0.08
   1   3  -6    1.05    0.06
  -3   6   1    1.06    0.06
  -3   6   1    0.95    0.07
  -1  -3  -6    1.05    0.07
  -6   1   3    1.15    0.06
  -6   1   3    1.04    0.05
  -3  -6  -1    1.10    0.06
  -3  -6  -1    0.98    0.08
   6   1  -3    0.98    0.08
   1  -3   6    1.01    0.06
  -1  -3  -6    0.98    0.07
  -1   3   6    1.05    0.05
  -1   3   6    1.06    0.07
  -6  -1  -3    0.99    0.07
   3   6  -1    0.98    0.07
   3   6  -1    1.01    0.07
   6   1  -3    0.94    0.08
   3   6   1    1.08    0.08
   1   3   6    0.97    0.06
  -1   3  -6    1.02    0.06
   3   6   1    0.96    0.07
  -3  -6   1    1.03    0.07
   6  -1  -3    1.19    0.08
  -6  -1   3    1.04    0.06
  -1   3  -6    1.00    0.06
  -3   6  -1    1.13    0.06
   6  -1  -3    1.05    0.07
  -6   1  -3    1.10    0.07
  -6   1  -3    0.95    0.05
  -6  -1   3    1.06    0.06
   6  -1  -3    0.99    0.08
  -1  -3   6    1.14    0.07
   6   1   3    1.04    0.06
  -3  -6   1    1.02    0.08
   1  -3  -6    1.10    0.08
   1  -3  -6    1.03    0.07
  -3   6  -1    1.00    0.05
  -3   6  -1    1.09    0.08
  -1  -3   6    1.10    0.05
  -6   1  -3    1.00    0.07
  -3  -6   1    1.20    0.08
   6   1   3    1.04    0.08
   6   1   3    0.95    0.06
  -3   6  -1    1.02    0.06
  -1   3  -6    0.85    0.08
  -6  -3  -3   14.64    0.54
  -3   6   3   16.17    0.53
  -3   6   3   15.89    0.54
  -3  -6  -3   15.29    0.54
  -3  -6  -3   14.77    0.54
  -3   3   6   15.81    0.53
   3   6  -3   15.55    0.54
  -3  -3  -6   15.69    0.53
  -3  -3  -6   14.99    0.55
  -3   3   6   15.93    0.53
  -3  -6  -3   15.19    0.53
   3  -3   6   16.31    0.53
   3  -6   3   15.36    0.53
   3   3  -6   14.82    0.55
   3   3  -6   15.24    0.53
  -3   6   3   15.57    0.54
   3  -6   3   15.10    0.52
  -6  -3  -3   15.46    0.52
  -6  -3  -3   14.53    0.55
  -6   3   3   15.29    0.52
  -6   3   3   14.90    0.53
   3  -3   6   15.58    0.53
  -3  -3  -6   15.19    0.54
   3   3  -6   15.05    0.53
   6  -3   3   15.44    0.53
   6  -3   3   16.19    0.51
   6   3  -3   15.95    0.54
   6   3  -3   15.50    0.54
  -3   6   3   16.27    0.52
   3   6  -3   15.59    0.54
  -3  -6   3   15.36    0.54
  -3   3  -6   15.70    0.53
   3  -3  -6   15.83    0.55
   3  -3  -6   15.19    0.54
  -6   3  -3   15.66    0.55
  -3  -6   3   16.07    0.54
   6  -3  -3   14.94    0.55
  -3   3  -6   15.57    0.55
  -6  -3   3   15.98    0.53
   3   3   6   15.59    0.53
   3   3   6   15.94    0.52
   3   3   6   15.54    0.54
   6   3   3   15.55    0.53
   6   3   3   15.41    0.54
   6   3   3   15.06    0.54
  -3   6  -3   14.55    0.55
  -3   6  -3   15.11    0.52
  -6  -3   3   15.96    0.53
  -3   6  -3   14.98    0.53
  -3  -3   6   14.96    0.53
   6  -3  -3   14.97    0.54
   3   6   3   14.95    0.54
   3  -3  -6   15.55    0.53
  -3  -6   3   15.82    0.53
  -3  -3   6   15.35    0.52
  -6   3  -3   16.17    0.53
   3   6   3   15.05    0.54
   6  -3  -3   15.23    0.52
  -5   3   6   16.73    0.57
   3  -6   5   16.82    0.57
   5  -3   6   16.06    0.57
  -3  -6  -5   16.45    0.58
   3   6  -5   16.10    0.57
   3   6  -5   15.68    0.59
   6  -5   3   16.74    0.55
   6   5  -3   16.11    0.58
  -3   6   5   16.63    0.55
  -3   6   5   16.62    0.57
  -3   6   5   16.09    0.58
  -6  -5  -3   16.48    0.59
   5  -3   6   16.80    0.56
   3  -6   5   16.67    0.55
   5   3  -6   16.13    0.59
   5   3  -6   16.99    0.57
  -3  -6  -5   16.59    0.58
  -6  -5  -3   16.65    0.59
   5   3  -6   16.63    0.57
  -6   5   3   16.37    0.59
  -5   3   6   16.05    0.57
  -6   5   3   16.74    0.57
  -5  -3  -6   17.39    0.57
  -3  -6  -5   17.14    0.56
   6   5  -3   16.41    0.58
   6  -5   3   16.22    0.57
  -5  -3  -6   16.43    0.59
  -6   5   3   16.12    0.57
  -5   3  -6   16.28    0.57
   3  -6  -5   16.82    0.58
   3   6   5   16.06    0.58
   5  -3  -6   16.50    0.55
   5   3   6   16.49    0.57
  -5  -3   6   17.10    0.56
  -5  -3   6   16.61    0.57
  -5   3  -6   16.66    0.59
   6  -5  -3   16.17    0.58
   3   6   5   16.98    0.58
  -3   6  -5   15.77    0.59
  -3   6  -5   16.87    0.55
   5  -3  -6   16.33    0.58
  -3  -6   5   15.93    0.57
  -3   6  -5   16.77    0.57
  -3  -6   5   16.09    0.57
   6   5   3   16.21    0.59
   6   5   3   16.30    0.58
  -6  -5   3   16.06    0.57
  -6  -5   3   16.01    0.58
  -6  -5   3   16.16    0.57
  -6   5  -3   16.40    0.59
  -6   5  -3   16.83    0.56
  -3  -6   5   16.65    0.55
   6  -5  -3   16.87    0.56
   5   3   6   16.43    0.58
   5   3   6   17.05    0.56
   5  -3  -6   16.64    0.59
   3  -6  -5   16.76    0.57
  -4  -6   0    0.09    0.04
  -4   6   0    0.05    0.03
  -6   0  -4    0.10    0.03
  -6   0   4    0.02    0.02
  -4   6   0    0.05    0.02
  -4   6   0    0.02    0.04
  -4   6   0    0.03    0.02
  -6   0  -4    0.12    0.04
   6   0  -4    0.00    0.04
   6   0  -4   -0.01    0.04
   6   0   4    0.05    0.03
   6   0   4    0.07    0.03
   6   0   4    0.01    0.02
  -4  -6   0    0.05    0.04
   0   4   6    0.05    0.03
   0   4   6    0.06    0.03
   0   4   6    0.04    0.03
   4   6   0    0.05    0.04
  -6   0   4    0.02    0.02
   6   0  -4    0.07    0.03
  -6   0  -4    0.06    0.04
   0   4  -6    0.05    0.02
   4   6   0    0.04    0.02
   4   6   0   -0.01    0.03
   0   4  -6    0.00    0.04
   0  -4   6    0.05    0.03
   0  -4  -6    0.08    0.03
   0  -4  -6    0.12    0.04
   6  -2   4    0.57    0.05
   6  -2   4    0.55    0.03
  -6   2   4    0.62    0.05
  -2  -4  -6    0.46    0.05
  -4   6   2    0.54    0.05
  -4   6   2    0.45    0.05
   4   6  -2    0.50    0.05
   2   4  -6    0.63    0.05
  -4  -6  -2    0.46    0.05
   4  -6   2    0.56    0.04
   2   4  -6    0.56    0.04
   2   4  -6    0.51    0.07
   6   2  -4    0.63    0.06
  -6   2   4    0.52    0.04
  -2  -4  -6    0.39    0.05
  -2  -4  -6    0.47    0.05
   2  -4   6    0.48    0.04
  -6  -2  -4    0.53    0.06
  -4   6   2    0.45    0.04
  -2   4   6    0.45    0.05
  -2   4   6    0.45    0.05
  -4   6   2    0.44    0.04
  -6  -2  -4    0.52    0.05
  -4  -6  -2    0.35    0.05
  -6  -2  -4    0.54    0.05
  -4  -6  -2    0.40    0.06
   6   2  -4    0.51    0.05
  -6   2  -4    0.49    0.06
  -4   6  -2    0.69    0.07
  -4   6  -2    0.58    0.04
   2   4   6    0.43    0.05
   6  -2  -4    0.57    0.04
  -6   2  -4    0.48    0.05
   4   6   2    0.36    0.05
  -6  -2   4    0.56    0.05
  -4  -6   2    0.60    0.05
  -4  -6   2    0.50    0.05
  -4  -6   2    0.56    0.05
  -2  -4   6    0.61    0.03
   6  -2  -4    0.46    0.05
   6  -2  -4    0.50    0.06
  -2   4  -6    0.42    0.06
  -2   4  -6    0.43    0.04
   4   6   2    0.48    0.06
  -6  -2   4    0.48    0.04
   2  -4  -6    0.64    0.05
   2  -4  -6    0.61    0.06
   2  -4  -6    0.53    0.05
  -4   6  -2    0.55    0.05
   6   2   4    0.47    0.04
  -6   2  -4    0.49    0.03
  -2  -4   6    0.50    0.05
  -2   4  -6    0.41    0.04
   6   2   4    0.38    0.04
   6   2   4    0.45    0.05
   2   4   6    0.41    0.05
  -6  -4  -4   -0.04    0.03
  -4   6   4   -0.04    0.03
  -6  -4  -4    0.01    0.04
  -6  -4  -4    0.01    0.02
   6  -4   4    0.01    0.03
   6  -4   4    0.00    0.02
  -4  -6  -4   -0.01    0.03
  -4  -6  -4   -0.04    0.03
  -4  -6  -4    0.06    0.04
   6   4  -4   -0.02    0.04
   4   6  -4   -0.01    0.04
   4   4  -6   -0.02    0.02
  -4  -4  -6    0.00    0.02
  -4   6   4   -0.01    0.02
  -4   6   4    0.02    0.03
   4  -4   6    0.00    0.02
  -6   4   4    0.00    0.02
   4   6  -4    0.02    0.03
   6   4  -4    0.00    0.03
  -4   4   6    0.00    0.02
  -4   4   6    0.00    0.03
   4  -4   6   -0.01    0.02
   4  -6   4    0.07    0.02
  -4  -4  -6    0.00    0.04
  -4  -4  -6    0.01    0.04
   4   4  -6    0.00    0.05
   4   4  -6    0.04    0.03
  -6   4   4    0.01    0.02
   4  -6   4    0.01    0.02
   4  -6  -4   -0.02    0.03
   6   4   4   -0.01    0.03
   4  -6  -4    0.02    0.03
   4  -4  -6    0.01    0.04
  -4  -4   6    0.01    0.02
  -4   6  -4    0.01    0.02
  -4  -6   4    0.01    0.03
  -4   6  -4    0.00    0.02
  -6  -4   4   -0.04    0.02
   4   4   6   -0.04    0.03
   4   4   6    0.02    0.02
  -4  -4   6   -0.02    0.03
  -4   4  -6    0.04    0.04
  -4  -6   4   -0.01    0.03
   4   6   4    0.04    0.04
   4   6   4    0.04    0.03
   6  -4  -4   -0.01    0.02
   6  -4  -4    0.03    0.03
   6  -4  -4    0.01    0.04
  -4   6  -4   -0.03    0.04
   4  -4  -6    0.00    0.03
  -4   4  -6    0.01    0.02
  -4  -6   4    0.04    0.02
   6   4   4   -0.02    0.04
   6   4   4    0.00    0.03
   4   4   6    0.00    0.03
  -6   4  -4    0.05    0.02
  -6  -4   4   -0.01    0.03
  -6   4  -4    0.01    0.04
   6   1  -5    1.52    0.10
   6  -1   5    1.30    0.07
  -6  -1  -5    1.35    0.08
  -6  -1  -5    1.38    0.10
   1   5  -6    1.38    0.07
   1   5  -6    1.34    0.10
  -1   5   6    1.33    0.08
  -1   5   6    1.30    0.08
  -5  -6  -1    1.36    0.10
  -5   6   1    1.43    0.09
  -1  -5  -6    1.32    0.08
  -6  -1  -5    1.33    0.08
   5  -6   1    1.53    0.08
   6  -1   5    1.43    0.08
   6   1  -5    1.55    0.08
  -5   6   1    1.35    0.08
  -6   1   5    1.47    0.07
   1  -5   6    1.45    0.08
   5   6  -1    1.34    0.09
   5   6  -1    1.38    0.08
  -1  -5  -6    1.26    0.09
  -5   6   1    1.35    0.07
  -5  -6  -1    1.42    0.10
  -6   1   5    1.41    0.08
  -1   5   6    1.33    0.06
  -1  -5  -6    1.36    0.08
  -6   1  -5    1.33    0.07
  -1   5  -6    1.40    0.08
  -1   5  -6    1.23    0.10
  -6   1  -5    1.33    0.09
   6   1   5    1.50    0.08
  -6   1  -5    1.28    0.09
   1  -5  -6    1.38    0.06
   1  -5  -6    1.30    0.08
  -5  -6   1    1.28    0.08
  -5   6  -1    1.37    0.09
   6   1   5    1.37    0.08
  -6  -1   5    1.40    0.07
   1   5   6    1.39    0.08
   1   5   6    1.38    0.09
   5  -6  -1    1.45    0.07
   6  -1  -5    1.52    0.10
  -5   6  -1    1.48    0.07
  -6  -1   5    1.39    0.07
   5   6   1    1.28    0.09
   5   6   1    1.42    0.09
   6  -1  -5    1.54    0.08
   6  -1  -5    1.44    0.10
   1  -5  -6    1.44    0.08
  -5   6  -1    1.44    0.07
  -1  -5   6    1.51    0.08
  -5  -6   1    1.42    0.09
  -5  -6   1    1.35    0.09
   6   1   5    1.33    0.07
  -6  -3  -5   17.27    0.57
  -5   6   3   16.21    0.59
  -3   5   6   16.66    0.55
  -3   5   6   16.73    0.57
   6  -3   5   16.26    0.57
   6  -3   5   16.43    0.56
   6   3  -5   16.42    0.57
   6   3  -5   16.48    0.59
   3  -5   6   16.67    0.57
   3   5  -6   16.50    0.57
   3   5  -6   15.78    0.59
  -6   3   5   16.55    0.57
  -3  -5  -6   17.44    0.57
   5  -6   3   16.80    0.57
   5  -6   3   16.80    0.56
   5   6  -3   15.82    0.58
   5   6  -3   16.16    0.58
  -5   6   3   16.52    0.57
  -6  -3  -5   15.91    0.59
  -6  -3  -5   16.59    0.58
  -3  -5  -6   16.53    0.58
   3   5  -6   16.23    0.57
  -3   5   6   16.41    0.58
  -5   6   3   16.37    0.57
  -3  -5  -6   16.65    0.58
  -6   3   5   16.69    0.57
  -5  -6  -3   16.87    0.59
  -5  -6  -3   16.47    0.59
  -5  -6   3   16.94    0.57
  -5  -6   3   16.21    0.58
  -5  -6   3   16.08    0.58
  -5   6  -3   15.87    0.59
  -5   6  -3   17.09    0.56
   6  -3  -5   16.67    0.56
  -6   3  -5   16.29    0.57
   5   6   3   16.70    0.59
   5  -6  -3   16.45    0.57
   5   6   3   16.77    0.58
  -6  -3   5   16.80    0.57
  -3  -5   6   16.74    0.55
  -3  -5   6   16.34    0.58
  -3   5  -6   16.48    0.57
  -3   5  -6   16.20    0.60
  -3   5  -6   17.14    0.56
   6  -3  -5   16.58    0.58
   6  -3  -5   16.44    0.59
  -6   3  -5   16.11    0.59
   3  -5  -6   16.67    0.57
   3  -5  -6   16.48    0.58
   3  -5  -6   15.83    0.58
   6   3   5   16.33    0.58
   6   3   5   17.16    0.57
   6   3   5   16.75    0.57
  -6  -3   5   17.21    0.57
   3   5   6   16.48    0.58
   3   5   6   16.75    0.58
   5  -6  -3   16.67    0.56
  -6  -5  -5    0.11    0.02
  -6  -5  -5    0.07    0.05
  -6  -5  -5    0.07    0.04
   5   6  -5    0.33    0.03
   5  -5   6    0.14    0.04
   5  -5   6    0.16    0.03
   5   5  -6    0.12    0.03
  -6   5   5    0.10    0.03
  -6   5   5    0.20    0.04
  -5  -6  -5    0.13    0.04
  -5  -6  -5    0.17    0.05
   6   5  -5    0.16    0.05
   6   5  -5    0.19    0.03
   5  -6   5    0.11    0.03
  -5  -5  -6    0.24    0.03
  -5  -5  -6    0.09    0.05
  -5  -5  -6    0.12    0.05
   5  -6   5    0.05    0.03
   6  -5   5    0.17    0.04
   6  -5   5    0.20    0.03
   6   5  -5    0.15    0.04
  -5   5   6    0.15    0.04
  -5   5   6    0.07    0.03
   5   5  -6    0.18    0.06
   5   6  -5    0.22    0.04
  -5   6   5    0.17    0.04
  -5   6   5    0.14    0.04
   5   6  -5    0.14    0.05
   5   5  -6    0.16    0.03
   5  -6  -5    0.13    0.04
  -5   6  -5    0.08    0.05
  -5  -6   5    0.09    0.04
   5  -5  -6    0.15    0.02
   5  -5  -6    0.11    0.04
   5  -5  -6    0.13    0.05
  -6  -5   5    0.07    0.03
  -6   5  -5    0.15    0.05
  -6   5  -5    0.18    0.03
   5  -6  -5    0.17    0.02
   5  -6  -5    0.20    0.04
   5   5   6    0.15    0.05
   5   5   6    0.12    0.04
  -5   6  -5    0.13    0.02
  -5  -5   6    0.13    0.02
  -6  -5   5    0.19    0.03
   5   6   5    0.17    0.05
   5   6   5    0.15    0.04
   6  -5  -5    0.12    0.02
   6  -5  -5    0.05    0.04
   6  -5  -5    0.15    0.05
  -5  -5   6    0.18    0.04
  -5   5  -6    0.15    0.05
  -5   5  -6    0.13    0.03
  -5  -6   5    0.19    0.03
  -5  -6   5    0.15    0.04
   6   5   5    0.09    0.05
   6   5   5    0.13    0.03
   6   5   5    0.31    0.05
  -6  -6   0    4.71    0.20
  -6  -6   0    4.62    0.21
  -6   0  -6    4.96    0.20
  -6   0  -6    4.91    0.21
  -6   0  -6    4.88    0.19
  -6   0   6    4.82    0.19
  -6   0   6    4.92    0.19
  -6   6   0    4.87    0.21
  -6   6   0    4.86    0.19
  -6   6   0    5.07    0.18
   0  -6  -6    5.17    0.19
   0  -6  -6    4.96    0.20
   0  -6   6    4.81    0.19
   0   6  -6    4.79    0.19
   0   6  -6    4.57    0.22
   0   6   6    4.91    0.18
   0   6   6    4.83    0.20
   6  -6   0    4.90    0.19
   6   0  -6    4.98    0.18
   6   0  -6    5.01    0.21
   6   0  -6    5.06    0.21
   6   0   6    4.80    0.19
   6   0   6    5.14    0.18
   6   6   0    5.18    0.21
   6   6   0    4.85    0.18
   6   6   0    4.63    0.20
  -6  -6  -2    0.07    0.05
  -6  -6  -2    0.08    0.04
   6  -2   6    0.09    0.02
   6   2  -6    0.09    0.03
   6   2  -6    0.03    0.05
  -6  -2  -6    0.13    0.03
  -6  -2  -6    0.07    0.05
  -6  -2  -6    0.13    0.04
   2   6  -6    0.08    0.03
   6   6  -2    0.10    0.04
   6   6  -2    0.16    0.04
   6  -2   6    0.08    0.03
  -2  -6  -6    0.06    0.03
  -6   2   6    0.06    0.03
  -6   2   6    0.11    0.03
   6   2  -6    0.10    0.03
  -2   6   6    0.05    0.03
  -6   6   2    0.09    0.04
  -6   6   2    0.03    0.03
  -6   6   2    0.10    0.03
   6  -6   2    0.08    0.02
  -2  -6  -6    0.06    0.04
  -2  -6  -6    0.07    0.03
   2  -6   6    0.08    0.03
   2   6  -6    0.11    0.05
   6  -6   2    0.05    0.03
  -2   6   6    0.07    0.03
  -2   6  -6    0.07    0.03
  -6   2  -6    0.10    0.02
   2  -6  -6    0.08    0.04
   2  -6  -6    0.07    0.03
  -2  -6   6    0.08    0.03
  -6  -2   6    0.06    0.03
  -6   6  -2    0.09    0.03
   2   6   6    0.12    0.04
   2   6   6    0.11    0.04
   6  -6  -2    0.06    0.02
   6  -6  -2    0.15    0.04
  -2   6  -6    0.13    0.05
   2  -6  -6    0.12    0.03
   6  -2  -6    0.07    0.03
   6  -2  -6    0.13    0.05
   6  -2  -6    0.13    0.05
  -6   2  -6    0.07    0.03
  -6  -6   2    0.04    0.03
  -6  -6   2    0.09    0.04
  -6  -6   2    0.06    0.03
  -6   6  -2    0.12    0.05
   6   2   6    0.04    0.04
   6   2   6    0.07    0.03
   6   2   6    0.04    0.03
  -6  -2   6    0.08    0.03
  -6   2  -6    0.11    0.04
   6   6   2    0.10    0.04
   6   6   2    0.11    0.04
  -6  -6  -4    0.60    0.08
  -6  -6  -4    0.62    0.07
   6  -4   6    0.56    0.05
   6  -4   6    0.60    0.05
   6   4  -6    0.41    0.05
  -6  -4  -6    0.66    0.05
  -6  -4  -6    0.57    0.07
  -6  -4  -6    0.60    0.06
   6  -6   4    0.51    0.04
   4   6  -6    0.47    0.05
   6   6  -4    0.52    0.06
   6   6  -4    0.59    0.07
  -6   4   6    0.49    0.05
  -6   4   6    0.37    0.05
   4   6  -6    0.35    0.06
   6   4  -6    0.32    0.07
  -6   6   4    0.57    0.05
  -6   6   4    0.48    0.05
  -4  -6  -6    0.58    0.04
  -4  -6  -6    0.66    0.07
  -4  -6  -6    0.65    0.07
   6  -6   4    0.43    0.05
   6   6  -4    0.52    0.03
   4   6  -6    0.37    0.05
   6   4  -6    0.43    0.04
  -4   6   6    0.63    0.04
  -4   6   6    0.50    0.05
  -4   6   6    0.61    0.06
   4  -6   6    0.43    0.04
   4  -6  -6    0.56    0.06
   4  -6  -6    0.55    0.05
  -4   6  -6    0.34    0.07
  -6   6  -4    0.39    0.06
  -6  -4   6    0.43    0.05
   4   6   6    0.63    0.07
   4   6   6    0.55    0.06
   6  -6  -4    0.47    0.04
   6  -6  -4    0.51    0.06
   6  -6  -4    0.45    0.06
  -4  -6   6    0.46    0.04
  -6  -4   6    0.40    0.04
   6  -4  -6    0.46    0.04
   6  -4  -6    0.42    0.06
   6  -4  -6    0.37    0.06
  -6  -6   4    0.52    0.05
  -6  -6   4    0.44    0.05
  -6  -6   4    0.43    0.05
  -6   6  -4    0.47    0.04
  -4   6  -6    0.44    0.04
   6   4   6    0.57    0.06
   6   4   6    0.64    0.05
   6   4   6    0.55    0.06
  -6   4  -6    0.49    0.07
  -6   4  -6    0.66    0.05
  -4  -6   6    0.44    0.05
   6   6   4    0.62    0.07
   6   6   4    0.58    0.06
  -6  -6  -6    0.04    0.02
  -6  -6  -6    0.06    0.05
  -6  -6  -6    0.09    0.04
   6   6  -6    0.07    0.03
   6   6  -6    0.01    0.05
   6  -6   6    0.07    0.03
   6   6  -6    0.03    0.03
  -6   6   6    0.03    0.03
  -6   6   6    0.04    0.03
   6  -6   6    0.06    0.03
   6  -6  -6    0.06    0.04
   6  -6  -6    0.07    0.05
   6  -6  -6    0.04    0.02
  -6   6  -6    0.08    0.05
  -6   6  -6    0.04    0.02
  -6  -6   6    0.07    0.03
  -6  -6   6    0.00    0.02
   6   6   6    0.06    0.05
   6   6   6    0.02    0.04
  -1   0   7    0.02    0.01
  -1   0   7    0.00    0.02
  -1   0   7    0.00    0.03
   0  -7  -1    0.01    0.02
   0  -7   1    0.00    0.02
   0  -7   1   -0.02    0.03
   0   7  -1   -0.02    0.02
   0   7  -1    0.02    0.03
   0   7  -1    0.05    0.03
   0   7   1    0.03    0.02
   0   7   1   -0.02    0.02
   0   7   1    0.01    0.03
   1   0  -7   -0.04    0.04
   1   0  -7    0.06    0.04
   1   0   7   -0.01    0.02
   1   0   7    0.04    0.03
   7  -1   0   -0.03    0.03
   7  -1   0   -0.01    0.03
   7   1   0    0.00    0.03
   7   1   0    0.03    0.03
  -1   0  -7    0.05    0.04
  -1   0  -7    0.04    0.03
  -7   1   0   -0.01    0.03
  -1   0  -7    0.01    0.04
  -7  -1   0   -0.03    0.02
  -7  -1   0   -0.01    0.02
  -7   1   0    0.00    0.03
  -7  -1   0   -0.05    0.03
  -7  -1   0   -0.01    0.03
   3   0  -7    0.05    0.04
   3   0  -7    0.02    0.01
   0  -7   3    0.00    0.03
  -3   0   7    0.02    0.03
   0  -7  -3    0.02    0.02
   0  -7   3    0.05    0.02
  -3   0  -7    0.02    0.04
  -3   0   7    0.02    0.02
   7   3   0    0.01    0.03
  -7  -3   0    0.01    0.03
  -7  -3   0    0.01    0.03
  -7  -3   0    0.01    0.03
  -7   3   0    0.02    0.04
   0   7   3    0.01    0.02
   0   7   3    0.02    0.03
   0   7   3    0.01    0.03
   3   0   7    0.04    0.03
   7  -3   0    0.02    0.03
   7  -3   0    0.02    0.03
   7   3   0    0.04    0.04
   7   3   0    0.06    0.04
  -7   3   0    0.04    0.03
  -3   0  -7    0.03    0.04
   0  -7   3    0.02    0.03
   0   7  -3    0.04    0.03
   0   7  -3    0.05    0.04
   3   0  -7    0.02    0.03
   3   0   7    0.03    0.02
   0   7   5    0.04    0.02
   0   7   5    0.03    0.03
  -7   5   0    0.00    0.02
  -5   0  -7    0.04    0.04
   0   7  -5    0.00    0.02
   0   7  -5    0.03    0.05
  -7  -5   0    0.01    0.04
  -7  -5   0   -0.04    0.03
  -7   5   0    0.02    0.04
   5   0  -7    0.04    0.05
   5   0  -7    0.01    0.03
  -7   5   0    0.03    0.03
   0  -7  -5    0.02    0.03
   0  -7  -5    0.00    0.03
   0  -7   5    0.03    0.03
  -5   0   7    0.00    0.02
  -5   0   7   -0.02    0.03
   7   5   0    0.03    0.03
   5   0   7   -0.04    0.02
   7  -5   0    0.01    0.02
   7  -5   0    0.00    0.03
   0  -7   5    0.02    0.03
   5   0  -7    0.01    0.02
   7   5   0   -0.01    0.04
   5   0   7    0.01    0.03
  -7  -5   0    0.05    0.04
  -5   0  -7    0.03    0.04
   7   0   1   -0.03    0.03
   7   0   1    0.03    0.03
   7   0  -1    0.07    0.04
   1   7   0    0.01    0.02
  -1   7   0    0.02    0.03
   0  -1  -7   -0.01    0.04
   0  -1  -7    0.01    0.04
   0   1  -7    0.07    0.04
  -1   7   0    0.02    0.02
  -7   0   1    0.01    0.03
  -7   0   1    0.02    0.02
  -1  -7   0    0.06    0.02
   0  -1   7   -0.01    0.02
   0  -1   7    0.04    0.03
  -7   0  -1   -0.02    0.03
  -7   0  -1    0.01    0.03
  -7   0  -1    0.02    0.02
   1   7   0    0.05    0.03
   1   7   0    0.09    0.04
   7   0  -1    0.01    0.04
  -1  -7   0    0.00    0.03
  -1   7   0   -0.01    0.03
  -1   7   0    0.03    0.02
   0   1   7    0.00    0.02
   0   1   7    0.02    0.03
   0   1  -7    0.05    0.04
   0   1  -7    0.01    0.02
  -2   1   7    0.31    0.04
  -1  -7  -2    0.32    0.03
  -2  -1  -7    0.35    0.05
  -2   1   7    0.32    0.04
  -1   7   2    0.29    0.04
  -1   7   2    0.30    0.05
   1  -7   2    0.22    0.04
  -7  -2  -1    0.39    0.04
  -7  -2  -1    0.40    0.05
  -7  -2  -1    0.33    0.04
  -7   2   1    0.25    0.04
  -7   2   1    0.31    0.02
  -1   7   2    0.28    0.03
   2  -1   7    0.33    0.03
   2  -1   7    0.34    0.04
   2   1  -7    0.30    0.03
   2   1  -7    0.24    0.06
   2   1  -7    0.17    0.04
   1   7  -2    0.33    0.04
   1   7  -2    0.30    0.05
  -2   1   7    0.36    0.02
  -1   7   2    0.33    0.04
   7  -2   1    0.29    0.04
   7  -2   1    0.30    0.04
   7   2  -1    0.24    0.05
   7   2  -1    0.29    0.05
  -2  -1  -7    0.29    0.06
  -2  -1  -7    0.49    0.05
  -7   2   1    0.15    0.04
  -1  -7  -2    0.35    0.04
   7   2  -1    0.26    0.04
   1  -7   2    0.36    0.04
  -2   1  -7    0.30    0.04
  -2   1  -7    0.21    0.05
   2  -1  -7    0.32    0.06
  -7   2  -1    0.32    0.05
  -7  -2   1    0.27    0.04
  -2  -1   7    0.19    0.04
  -1  -7   2    0.32    0.04
   7  -2  -1    0.30    0.04
  -1  -7   2    0.28    0.04
  -2  -1   7    0.24    0.03
  -1   7  -2    0.25    0.05
  -1   7  -2    0.33    0.03
   7   2   1    0.43    0.04
   7  -2  -1    0.25    0.04
   1   7   2    0.30    0.04
   1   7   2    0.38    0.03
   1   7   2    0.29    0.05
  -2   1  -7    0.20    0.06
   2   1   7    0.34    0.03
   2   1   7    0.35    0.04
   7   2   1    0.37    0.05
  -7   2  -1    0.23    0.04
  -1   7  -2    0.28    0.04
  -7  -2   1    0.26    0.04
  -7  -2   1    0.33    0.03
  -1  -7   2    0.28    0.04
   2  -1  -7    0.27    0.04
   7   2   1    0.37    0.05
  -4   1   7    0.06    0.03
  -7   4   1    0.09    0.02
  -7  -4  -1    0.12    0.04
   7  -4   1    0.07    0.03
   7  -4   1    0.10    0.03
   7   4  -1    0.03    0.04
   1  -7   4    0.11    0.03
  -7  -4  -1    0.09    0.04
  -1  -7  -4    0.08    0.03
  -1  -7  -4    0.08    0.03
  -1   7   4    0.06    0.04
   4   1  -7    0.10    0.02
  -7   4   1    0.11    0.04
  -7   4   1    0.11    0.03
   4  -1   7    0.04    0.03
  -1   7   4    0.07    0.02
  -1   7   4    0.09    0.03
   1  -7   4    0.05    0.03
   1   7  -4    0.03    0.03
   1   7  -4    0.02    0.04
  -1  -7  -4    0.05    0.02
   4   1  -7    0.07    0.05
   4  -1   7    0.07    0.03
  -4   1   7    0.09    0.03
  -4  -1  -7    0.06    0.04
  -4  -1  -7    0.08    0.05
   4   1  -7    0.05    0.03
   7   4  -1    0.04    0.03
  -1  -7   4    0.07    0.03
  -4  -1   7    0.13    0.03
   7   4   1    0.13    0.05
   1  -7  -4    0.06    0.03
  -1   7  -4    0.06    0.04
   7   4   1    0.10    0.03
  -1  -7   4    0.06    0.02
  -4   1  -7    0.01    0.04
   4  -1  -7    0.07    0.03
  -7   4  -1    0.12    0.03
  -1  -7   4    0.06    0.03
  -1   7  -4    0.13    0.03
   1  -7  -4    0.04    0.03
  -7  -4   1    0.09    0.04
  -7  -4   1    0.07    0.03
  -4  -1   7    0.09    0.02
   1   7   4    0.11    0.03
   1   7   4    0.07    0.04
   4  -1  -7    0.05    0.04
  -7   4  -1    0.05    0.04
  -4   1  -7    0.09    0.04
   7  -4  -1    0.02    0.03
   7   4   1    0.09    0.04
   4   1   7    0.07    0.03
  -7  -4   1    0.10    0.04
   7   4   1    0.15    0.03
   4   1   7    0.09    0.03
   7  -4  -1    0.11    0.03
   7  -6   1    0.23    0.04
   7   6  -1    0.25    0.05
  -7  -6  -1    0.24    0.05
   6  -1   7    0.27    0.04
  -6  -1  -7    0.24    0.04
   7  -6   1    0.24    0.03
   1  -7   6    0.29    0.03
  -7  -6  -1    0.18    0.05
  -7   6   1    0.31    0.04
   7   6  -1    0.29    0.04
  -1  -7  -6    0.28    0.04
  -1  -7  -6    0.37    0.05
  -7   6   1    0.31    0.04
   1   7  -6    0.24    0.04
  -6   1   7    0.23    0.04
  -6   1   7    0.30    0.04
  -1  -7  -6    0.31    0.04
   1  -7   6    0.24    0.04
   6   1  -7    0.25    0.04
  -1   7   6    0.24    0.05
   6   1  -7    0.24    0.06
  -1   7   6    0.26    0.03
   6  -1   7    0.34    0.04
  -1   7   6    0.30    0.04
  -7   6   1    0.27    0.05
  -6  -1  -7    0.37    0.06
  -6  -1  -7    0.24    0.05
   6   1  -7    0.28    0.03
   1   7  -6    0.28    0.06
  -6   1  -7    0.25    0.05
   6  -1  -7    0.23    0.05
  -6   1  -7    0.29    0.03
  -1   7  -6    0.19    0.06
   1   7   6    0.27    0.04
   1  -7  -6    0.25    0.03
   7  -6  -1    0.38    0.05
   6  -1  -7    0.28    0.03
  -6  -1   7    0.30    0.04
   6  -1  -7    0.22    0.06
  -7  -6   1    0.23    0.05
  -7  -6   1    0.23    0.04
   6   1   7    0.28    0.03
  -1   7  -6    0.23    0.04
  -7   6  -1    0.23    0.04
   6   1   7    0.28    0.04
   7  -6  -1    0.26    0.04
  -7  -6   1    0.46    0.06
   7   6   1    0.25    0.05
   7   6   1    0.24    0.03
  -6  -1   7    0.31    0.04
  -6   1  -7    0.35    0.05
  -1  -7   6    0.27    0.04
  -1  -7   6    0.27    0.04
   6  -1  -7    0.33    0.04
   1   7   6    0.15    0.05
  -7   6  -1    0.24    0.05
   7   6   1    0.21    0.04
   1  -7  -6    0.29    0.04
   6   1   7    0.25    0.04
   1  -7  -6    0.31    0.05
  -2  -7  -1    0.32    0.05
   1   2  -7    0.22    0.05
   7  -1   2    0.26    0.04
  -7  -1  -2    0.35    0.04
  -7  -1  -2    0.31    0.05
  -7  -1  -2    0.37    0.04
   7   1  -2    0.34    0.05
  -2  -7  -1    0.40    0.04
   1   2  -7    0.26    0.03
   1   2  -7    0.27    0.06
  -1  -2  -7    0.29    0.05
  -2   7   1    0.26    0.04
  -1  -2  -7    0.33    0.05
  -2   7   1    0.36    0.05
  -2  -7  -1    0.37    0.03
   2   7  -1    0.17    0.04
  -2   7   1    0.36    0.04
   7  -1   2    0.42    0.05
   7   1  -2    0.32    0.05
  -1   2   7    0.29    0.02
  -1   2   7    0.24    0.04
  -1   2   7    0.29    0.04
  -7   1   2    0.30    0.04
  -7   1   2    0.33    0.03
   1  -2   7    0.38    0.03
   1  -2   7    0.31    0.04
  -2   7   1    0.38    0.04
  -1  -2  -7    0.43    0.04
   2   7  -1    0.22    0.04
   7   1  -2    0.35    0.05
   2   7  -1    0.31    0.04
  -7  -1   2    0.32    0.03
  -7   1  -2    0.25    0.04
  -1  -2   7    0.24    0.04
  -7  -1   2    0.30    0.04
  -2   7  -1    0.24    0.03
  -7   1  -2    0.42    0.05
   7  -1  -2    0.22    0.05
  -2  -7   1    0.28    0.05
  -1  -2   7    0.33    0.03
  -2   7  -1    0.31    0.05
  -1   2  -7    0.51    0.06
   7   1   2    0.34    0.05
   7   1   2    0.33    0.04
   7   1   2    0.34    0.03
  -2  -7   1    0.25    0.04
   2   7   1    0.37    0.05
  -2   7  -1    0.32    0.03
  -2   7  -1    0.28    0.04
  -1   2  -7    0.34    0.04
  -1   2  -7    0.27    0.06
  -2  -7   1    0.30    0.02
   7  -1  -2    0.23    0.04
   7  -1  -2    0.27    0.04
   1  -2  -7    0.20    0.05
   1  -2  -7    0.27    0.04
   1   2   7    0.40    0.04
   1   2   7    0.40    0.04
   2   7   1    0.37    0.03
   2   7   1    0.40    0.05
  -3   2   7    2.05    0.10
   3   2  -7    1.94    0.10
  -7   3   2    2.08    0.12
  -7   3   2    2.16    0.08
  -3  -2  -7    2.06    0.11
  -7  -3  -2    2.14    0.09
  -7  -3  -2    2.07    0.11
   2  -7   3    1.94    0.10
   3   2  -7    1.78    0.12
  -2  -7  -3    2.30    0.11
   3   2  -7    2.06    0.09
  -3  -2  -7    2.01    0.12
  -3  -2  -7    2.10    0.11
   3  -2   7    2.11    0.09
  -2   7   3    2.00    0.10
   2   7  -3    1.84    0.11
  -7   3   2    2.17    0.10
  -3   2   7    1.92    0.10
  -2  -7  -3    2.22    0.08
  -2  -7  -3    2.23    0.10
   3  -2   7    2.15    0.09
   7   3  -2    1.91    0.10
  -2   7   3    1.89    0.09
   7  -3   2    1.94    0.10
   7  -3   2    1.87    0.10
   7   3  -2    1.96    0.11
   2  -7   3    2.15    0.10
   2   7  -3    1.91    0.10
  -2   7   3    2.12    0.10
  -2   7   3    2.04    0.11
  -3  -2   7    1.91    0.10
   3  -2  -7    2.02    0.10
  -3   2  -7    2.01    0.12
  -3   2  -7    2.17    0.11
  -3  -2   7    2.04    0.09
   7  -3  -2    2.18    0.11
   3   2   7    2.12    0.10
   2   7   3    2.08    0.10
   3  -2  -7    1.93    0.12
  -7  -3   2    2.03    0.10
  -7  -3   2    1.94    0.10
  -7  -3   2    2.03    0.09
  -7   3  -2    1.74    0.11
  -2   7  -3    2.19    0.12
   7   3   2    2.03    0.12
   7   3   2    2.24    0.11
   7   3   2    2.17    0.10
  -7   3  -2    2.18    0.10
  -2  -7   3    1.98    0.09
  -2  -7   3    1.78    0.10
  -2  -7   3    1.89    0.10
   7  -3  -2    2.03    0.09
  -2   7  -3    2.24    0.08
   3   2   7    2.04    0.10
  -2  -7  -5    2.42    0.12
  -7  -5  -2    2.42    0.13
  -7  -5  -2    2.38    0.14
   7  -5   2    2.69    0.09
  -2  -7  -5    2.43    0.12
  -2   7   5    2.68    0.10
  -2   7   5    2.47    0.12
  -2   7   5    2.51    0.13
   5  -2   7    2.47    0.11
  -7   5   2    2.47    0.14
   7   5  -2    2.47    0.13
   2  -7   5    2.52    0.10
   7  -5   2    2.45    0.11
   7   5  -2    2.43    0.12
   5  -2   7    2.52    0.11
   5   2  -7    2.44    0.10
   5   2  -7    2.29    0.14
   5   2  -7    2.57    0.12
  -5   2   7    2.55    0.11
  -5   2   7    2.61    0.12
  -2  -7  -5    2.56    0.11
   2  -7   5    2.42    0.11
  -7   5   2    2.46    0.11
  -5  -2  -7    2.62    0.12
  -5  -2  -7    2.29    0.14
   2   7  -5    2.58    0.14
   2   7  -5    2.66    0.12
  -7   5   2    2.44    0.11
   2  -7  -5    2.42    0.12
   2  -7  -5    2.54    0.11
   7   5   2    2.25    0.13
  -5  -2   7    2.52    0.11
  -2   7  -5    2.34    0.14
  -2   7  -5    2.58    0.09
   5   2   7    2.61    0.10
  -7   5  -2    2.63    0.13
  -7   5  -2    2.72    0.11
   7   5   2    2.53    0.10
   7   5   2    2.58    0.12
   7  -5  -2    2.34    0.12
  -7  -5   2    2.71    0.12
  -7  -5   2    2.51    0.13
   2  -7  -5    2.50    0.12
  -5  -2   7    2.43    0.12
  -5   2  -7    2.61    0.14
  -5   2  -7    2.54    0.12
   5   2   7    2.51    0.12
   5  -2  -7    2.39    0.12
  -7  -5   2    2.52    0.12
   7  -5  -2    2.40    0.11
  -2  -7   5    2.67    0.09
   5  -2  -7    2.90    0.15
   5  -2  -7    2.69    0.13
  -2  -7   5    2.57    0.12
  -2  -7   5    2.45    0.12
  -2   7  -5    2.47    0.12
   2   7   5    2.41    0.12
   2   7   5    2.23    0.12
   5   2   7    2.60    0.12
   3   7   0    0.03    0.03
  -3  -7   0    0.10    0.04
  -7   0   3    0.02    0.02
  -3   7   0   -0.01    0.03
   7   0  -3    0.00    0.03
   7   0  -3    0.06    0.04
   7   0  -3   -0.02    0.03
  -3   7   0    0.00    0.02
   0   3  -7    0.02    0.04
   0   3  -7    0.02    0.02
   0   3   7    0.04    0.02
   0   3   7    0.02    0.03
  -7   0  -3    0.00    0.03
  -7   0  -3    0.00    0.03
  -7   0  -3    0.02    0.03
  -7   0   3    0.07    0.03
   7   0   3    0.05    0.03
   0   3  -7    0.01    0.04
   0  -3   7    0.02    0.03
   0   3  -7    0.02    0.02
   7   0   3    0.05    0.03
   3   7   0    0.02    0.03
  -3   7   0    0.02    0.02
  -3   7   0   -0.01    0.03
   0  -3  -7    0.10    0.04
   0  -3  -7    0.01    0.03
  -3  -7   0    0.03    0.04
   7   0   3    0.01    0.02
  -3  -7   0    0.05    0.02
   0   3   7    0.01    0.03
   3   7   0    0.04    0.02
   7   2  -3    2.05    0.11
  -2   3   7    2.05    0.10
  -2   3   7    2.01    0.10
  -3   7   2    1.88    0.09
  -2  -3  -7    2.28    0.12
   2  -3   7    1.99    0.09
   2  -3   7    2.09    0.10
  -7  -2  -3    2.19    0.11
  -3  -7  -2    2.10    0.11
  -3   7   2    2.14    0.11
   2   3  -7    1.96    0.12
   2   3  -7    1.88    0.11
  -3   7   2    2.01    0.09
  -2  -3  -7    2.02    0.11
   3  -7   2    2.15    0.10
  -7   2   3    2.00    0.08
   7  -2   3    2.04    0.10
   7  -2   3    1.95    0.10
   7   2  -3    1.96    0.11
  -7  -2  -3    2.18    0.10
  -7  -2  -3    2.09    0.11
   2   3  -7    2.02    0.09
  -2  -3  -7    2.15    0.11
  -3   7   2    1.98    0.11
  -3  -7  -2    2.20    0.09
   3   7  -2    2.01    0.11
  -3   7  -2    1.95    0.11
  -3   7  -2    2.14    0.08
  -3   7  -2    2.05    0.10
   2   3   7    2.11    0.10
   3   7   2    2.04    0.11
   7   2   3    2.18    0.10
   2  -3  -7    1.90    0.11
  -7  -2   3    1.92    0.09
  -3  -7   2    1.83    0.10
   7  -2  -3    2.05    0.11
   7  -2  -3    2.11    0.11
   2   3   7    2.10    0.10
  -2  -3   7    2.11    0.08
  -2  -3   7    1.95    0.10
  -2   3  -7    1.78    0.09
  -7   2  -3    1.99    0.11
  -7   2  -3    1.91    0.10
   3   7   2    2.10    0.11
  -7  -2   3    1.96    0.10
   7   2   3    2.09    0.09
  -3  -7   2    1.83    0.10
  -3  -7   2    1.94    0.11
   7   2   3    2.22    0.11
   7  -2  -3    1.95    0.10
  -4  -3  -7    2.96    0.15
   7  -4   3    3.20    0.11
  -7  -4  -3    3.05    0.16
  -7   4   3    3.19    0.13
  -7   4   3    3.47    0.13
  -4  -3  -7    2.88    0.13
   7   4  -3    2.78    0.14
  -3   7   4    2.92    0.12
  -3   7   4    2.71    0.14
  -7  -4  -3    3.04    0.12
   4  -3   7    2.75    0.13
  -4  -3  -7    2.91    0.15
  -4   3   7    3.28    0.13
   4   3  -7    3.49    0.16
   4   3  -7    3.41    0.13
   7   4  -3    3.15    0.14
  -3   7   4    2.93    0.13
  -4   3   7    3.10    0.13
  -3  -7  -4    2.92    0.13
  -3  -7  -4    3.06    0.14
   3   7  -4    3.01    0.14
   3   7  -4    3.13    0.15
   4  -3   7    2.95    0.13
  -7  -4  -3    2.99    0.15
   3  -7   4    3.46    0.13
   4   3  -7    3.30    0.13
   3  -7   4    3.37    0.12
  -7  -4   3    2.91    0.13
  -7  -4   3    3.01    0.13
  -3  -7   4    3.10    0.12
   7  -4  -3    3.32    0.13
   3   7   4    3.06    0.14
   4  -3  -7    3.16    0.14
   4  -3  -7    3.22    0.15
   4   3   7    3.01    0.14
  -3  -7   4    3.03    0.14
   7  -4  -3    3.44    0.15
   7   4   3    3.08    0.14
  -4  -3   7    3.20    0.14
  -4   3  -7    2.83    0.15
   4   3   7    2.99    0.11
   7   4   3    2.98    0.15
   3  -7  -4    3.02    0.14
  -7   4  -3    3.09    0.15
  -7   4  -3    3.12    0.13
  -3   7  -4    3.38    0.16
  -3   7  -4    3.50    0.12
   7   4   3    3.26    0.14
  -3  -7   4    2.96    0.14
  -4   3  -7    2.98    0.13
  -4  -3   7    3.44    0.12
   4   3   7    2.81    0.13
  -7  -4   3    2.74    0.14
  -3   7   6   10.42    0.39
  -7   6   3   10.35    0.37
   3   7  -6   10.60    0.38
  -3  -7  -6   10.75    0.36
  -3  -7  -6   10.47    0.38
   3  -7   6   10.07    0.36
  -3   7   6   11.04    0.36
  -7  -6  -3   10.13    0.40
  -3   7   6   10.77    0.38
   7   6  -3   10.50    0.39
   7   6  -3   10.37    0.38
   6  -3   7   10.38    0.37
   3  -7   6   10.08    0.37
  -6  -3  -7   10.63    0.38
   6   3  -7   10.37    0.37
  -6   3   7   10.90    0.38
  -7   6   3    9.93    0.40
  -7   6   3   10.07    0.38
  -3  -7  -6   10.17    0.39
  -6   3   7   10.75    0.38
   7  -6   3   11.02    0.38
   7  -6   3   11.43    0.36
   6   3  -7   10.06    0.37
   6   3  -7    9.47    0.40
   6  -3   7   10.56    0.38
  -6  -3  -7   11.00    0.38
  -6  -3  -7   10.95    0.41
   3   7  -6   11.01    0.40
  -7  -6  -3   10.53    0.40
  -3   7  -6   10.32    0.35
  -7  -6   3   10.41    0.38
   3  -7  -6   11.16    0.37
  -3  -7   6   10.43    0.38
   3  -7  -6   10.31    0.38
  -3  -7   6   10.35    0.38
  -3   7  -6    9.93    0.38
  -3  -7   6   10.94    0.35
   3   7   6   10.38    0.38
  -7   6  -3   11.02    0.40
   6   3   7   10.53    0.39
   6   3   7   11.30    0.37
  -7  -6   3   10.56    0.39
  -7  -6   3   10.09    0.38
  -6  -3   7    9.87    0.37
  -6  -3   7    9.76    0.38
  -6   3  -7   10.54    0.40
   7   6   3   10.68    0.40
  -7   6  -3   10.95    0.37
   3   7   6   10.10    0.39
   6  -3  -7   10.82    0.36
   6  -3  -7   10.99    0.39
   6  -3  -7   10.52    0.40
  -3   7  -6    9.67    0.40
   3  -7  -6   10.83    0.39
   7   6   3   10.51    0.39
  -6   3  -7   10.08    0.38
   7  -6  -3    9.63    0.37
   7  -6  -3    9.62    0.38
   6   3   7   10.68    0.38
  -4   7   1    0.09    0.03
  -4  -7  -1    0.16    0.05
  -4   7   1    0.08    0.03
   1   4  -7    0.11    0.04
  -4  -7  -1    0.10    0.03
  -7  -1  -4    0.08    0.03
  -7  -1  -4    0.08    0.04
  -7  -1  -4    0.07    0.03
  -4   7   1    0.03    0.02
  -4   7   1    0.08    0.04
  -1  -4  -7    0.07    0.04
  -1  -4  -7    0.13    0.04
   7  -1   4    0.08    0.03
   7  -1   4    0.04    0.02
  -4  -7  -1    0.11    0.04
   4   7  -1    0.05    0.04
   4   7  -1    0.07    0.03
   7  -1   4    0.08    0.03
   1   4  -7    0.02    0.05
  -7   1   4    0.09    0.03
  -1  -4  -7    0.03    0.03
   7   1  -4    0.07    0.04
   7   1  -4    0.08    0.05
  -1   4   7    0.07    0.02
  -1   4   7    0.04    0.03
  -7   1   4    0.11    0.03
  -1   4   7    0.04    0.03
   7   1  -4    0.06    0.04
   1   4  -7    0.08    0.02
   1  -4   7    0.09    0.03
   1   4   7    0.07    0.03
   4   7   1    0.06    0.04
   7  -1  -4    0.08    0.03
   1   4   7    0.09    0.03
   7  -1  -4    0.07    0.04
   4   7   1    0.12    0.04
  -1   4  -7    0.09    0.03
  -1   4  -7    0.03    0.04
   7   1   4    0.12    0.03
   1  -4  -7    0.10    0.03
   1  -4  -7    0.08    0.04
   7   1   4    0.05    0.04
   7   1   4    0.07    0.03
  -1  -4   7    0.08    0.03
  -4  -7   1    0.07    0.04
  -4   7  -1    0.06    0.03
  -4   7  -1    0.10    0.04
  -4   7  -1    0.07    0.02
  -7  -1   4    0.07    0.03
  -7  -1   4    0.05    0.02
  -7   1  -4    0.04    0.02
  -4  -7   1    0.09    0.04
  -1  -4   7    0.09    0.02
  -4  -7   1    0.06    0.04
  -7   1  -4    0.04    0.04
  -7   1  -4    0.04    0.03
  -4   7  -1    0.10    0.03
  -1   4  -7    0.07    0.02
   7  -1  -4    0.10    0.04
   4   7  -3    2.98    0.14
  -7  -3  -4    2.96    0.14
   7   3  -4    2.97    0.14
   7  -3   4    2.73    0.13
   7  -3   4    2.99    0.11
  -3  -4  -7    2.92    0.14
  -7   3   4    3.44    0.14
  -4   7   3    3.14    0.13
  -7   3   4    3.47    0.13
   4  -7   3    3.41    0.13
  -4  -7  -3    3.45    0.15
   3  -4   7    3.16    0.13
   3   4  -7    3.37    0.13
   7   3  -4    3.37    0.15
  -7  -3  -4    2.97    0.13
  -4   7   3    3.11    0.14
   4   7  -3    3.08    0.14
  -3  -4  -7    2.96    0.13
  -3  -4  -7    3.03    0.15
   3   4  -7    3.56    0.16
   3  -4   7    3.10    0.13
  -3   4   7    2.62    0.13
  -4  -7  -3    3.08    0.13
  -7  -3  -4    2.77    0.15
  -4   7   3    2.88    0.14
   3   4  -7    3.35    0.14
  -3   4   7    2.96    0.13
  -4   7   3    3.03    0.12
  -7   3  -4    2.55    0.15
  -7   3  -4    2.86    0.13
  -3  -4   7    3.50    0.12
  -4  -7   3    2.95    0.13
  -4  -7   3    3.03    0.14
  -4  -7   3    2.88    0.14
   7   3   4    3.17    0.14
   7   3   4    3.01    0.13
  -4   7  -3    2.99    0.15
  -7  -3   4    3.10    0.13
  -7  -3   4    3.32    0.13
   4   7   3    3.19    0.15
   4   7   3    3.27    0.15
   7   3   4    3.05    0.15
   3  -4  -7    3.05    0.14
  -3  -4   7    3.23    0.14
   3   4   7    3.00    0.14
   3   4   7    3.05    0.14
   3  -4  -7    3.27    0.15
  -3   4  -7    3.33    0.12
   7  -3  -4    3.45    0.13
   7  -3  -4    3.24    0.15
   7  -3  -4    3.43    0.16
   3  -4  -7    3.06    0.13
  -4   7  -3    3.33    0.13
  -4   7  -3    3.44    0.12
  -3   4  -7    3.15    0.16
  -4  -7  -5    2.44    0.12
  -7   5   4    2.25    0.11
   5  -4   7    2.41    0.11
  -5   4   7    2.48    0.12
   7   5  -4    2.26    0.12
  -7  -5  -4    2.40    0.13
  -7   5   4    2.09    0.11
   5   4  -7    2.29    0.11
  -4   7   5    2.36    0.11
  -4   7   5    2.22    0.12
   5   4  -7    2.12    0.14
   4  -7   5    2.42    0.11
  -4   7   5    2.49    0.10
  -4  -7  -5    1.98    0.12
   5  -4   7    2.19    0.10
  -7  -5  -4    2.38    0.09
  -5  -4  -7    2.38    0.11
   4   7  -5    2.58    0.12
   4   7  -5    2.42    0.13
   7  -5   4    2.38    0.11
  -5   4   7    2.42    0.11
   7  -5   4    2.49    0.09
   5   4  -7    2.35    0.11
   7   5  -4    2.36    0.13
   4  -7   5    2.35    0.09
  -4   7  -5    2.00    0.13
  -7  -5   4    2.06    0.12
  -7  -5   4    2.42    0.12
  -7   5  -4    2.42    0.14
   4  -7  -5    2.57    0.11
   5   4   7    2.31    0.12
  -4   7  -5    2.34    0.09
  -7  -5   4    2.24    0.11
  -5  -4   7    2.25    0.10
   7  -5  -4    2.11    0.10
  -4  -7   5    2.49    0.12
   4   7   5    2.51    0.13
   5  -4  -7    2.35    0.12
   5  -4  -7    2.27    0.13
   7   5   4    2.27    0.13
   7   5   4    2.42    0.12
   7   5   4    2.13    0.12
  -5   4  -7    2.32    0.14
  -5   4  -7    2.35    0.11
  -7   5  -4    2.67    0.11
  -4  -7   5    2.56    0.10
   4   7   5    2.25    0.12
  -4  -7   5    2.41    0.12
  -5  -4   7    2.18    0.12
   5   4   7    2.27    0.12
   5   4   7    2.40    0.10
   7  -5  -4    2.26    0.12
   7  -5  -4    2.12    0.13
   4  -7  -5    2.43    0.13
   5  -4  -7    2.42    0.12
  -4   7  -5    2.22    0.11
   0  -5  -7    0.00    0.03
   7   0   5    0.00    0.02
   7   0  -5   -0.01    0.04
  -7   0   5   -0.02    0.02
  -7   0   5    0.03    0.03
  -5  -7   0    0.03    0.04
  -5  -7   0   -0.02    0.04
  -5   7   0    0.01    0.02
  -5   7   0    0.00    0.04
  -5   7   0    0.01    0.02
  -5   7   0    0.02    0.03
   0  -5  -7    0.00    0.03
   7   0  -5   -0.03    0.04
   0  -5   7    0.00    0.03
   0   5  -7    0.02    0.02
   0   5  -7    0.03    0.05
   0   5   7    0.04    0.03
   0   5   7   -0.01    0.03
  -7   0  -5    0.00    0.04
  -7   0  -5    0.04    0.03
   5   7   0    0.02    0.02
   7   0  -5    0.08    0.03
  -7   0  -5   -0.02    0.03
   5   7   0    0.01    0.03
   7   0   5    0.02    0.03
   7   0   5   -0.01    0.02
   5   7   0   -0.03    0.03
  -5   7   2    2.60    0.13
  -7  -2  -5    2.29    0.12
  -5   7   2    2.63    0.11
  -2  -5  -7    2.42    0.12
   7  -2   5    2.38    0.12
   7  -2   5    2.59    0.10
   7   2  -5    2.90    0.12
  -5   7   2    2.76    0.12
  -7  -2  -5    2.53    0.11
  -7  -2  -5    2.32    0.14
   2   5  -7    2.66    0.11
   2   5  -7    2.54    0.15
   2   5  -7    2.47    0.12
  -7   2   5    2.50    0.12
  -7   2   5    2.64    0.11
  -5  -7  -2    2.50    0.14
   5   7  -2    2.55    0.13
   5   7  -2    2.59    0.12
  -2  -5  -7    2.55    0.12
  -2   5   7    2.53    0.12
  -2   5   7    2.45    0.12
   7   2  -5    2.41    0.13
  -5   7   2    2.74    0.11
   5  -7   2    2.39    0.11
   2  -5   7    2.68    0.12
  -2  -5  -7    2.45    0.13
  -5   7  -2    2.40    0.10
  -7   2  -5    2.65    0.12
  -5  -7   2    2.45    0.13
  -5  -7   2    2.43    0.12
  -7   2  -5    2.49    0.13
   7   2   5    2.37    0.11
  -2  -5   7    2.54    0.09
  -2  -5   7    2.48    0.12
  -2   5  -7    2.52    0.11
  -2   5  -7    2.30    0.14
  -2   5  -7    2.65    0.09
  -5   7  -2    2.39    0.11
  -5   7  -2    2.24    0.13
   2  -5  -7    2.49    0.11
   2  -5  -7    2.58    0.13
   7   2   5    2.44    0.13
   7   2   5    2.43    0.11
  -7  -2   5    2.69    0.11
  -7  -2   5    2.63    0.11
   7  -2  -5    2.31    0.13
  -7   2  -5    2.57    0.10
   2   5   7    2.58    0.13
  -5  -7   2    2.51    0.12
   7  -2  -5    2.38    0.13
   5   7   2    2.64    0.13
   5   7   2    2.37    0.13
   7  -2  -5    2.41    0.11
   2   5   7    2.64    0.12
  -4   5   7    2.33    0.12
  -7  -4  -5    2.23    0.14
   4  -5   7    2.51    0.11
   4   5  -7    2.32    0.11
   4   5  -7    2.20    0.14
   4  -5   7    2.44    0.11
  -5   7   4    2.52    0.11
  -7   4   5    2.15    0.11
  -7   4   5    2.38    0.11
   5  -7   4    2.20    0.09
   5  -7   4    2.11    0.10
   5   7  -4    2.35    0.12
   5   7  -4    2.33    0.13
   7   4  -5    2.44    0.12
  -7  -4  -5    2.58    0.13
  -4  -5  -7    2.58    0.13
  -4  -5  -7    2.54    0.13
  -4   5   7    2.24    0.11
   7   4  -5    2.38    0.13
  -4  -5  -7    2.51    0.11
  -5  -7  -4    2.42    0.13
   7  -4   5    2.32    0.09
   7  -4   5    2.20    0.11
   4   5  -7    2.19    0.11
  -5  -7  -4    2.46    0.12
  -7  -4  -5    2.38    0.10
  -5   7   4    2.34    0.12
   4   5   7    2.18    0.12
  -7  -4   5    2.48    0.11
  -7  -4   5    2.44    0.11
   7   4   5    2.24    0.12
  -4  -5   7    2.36    0.12
  -4   5  -7    2.46    0.14
  -5  -7   4    2.34    0.12
  -5  -7   4    2.28    0.10
  -5   7  -4    2.19    0.10
   4  -5  -7    2.05    0.11
   7   4   5    2.30    0.13
  -4  -5   7    2.32    0.09
  -4   5  -7    2.42    0.10
  -5   7  -4    2.40    0.14
   5   7   4    2.44    0.13
   4  -5  -7    2.20    0.11
   7  -4  -5    2.31    0.12
   7  -4  -5    2.06    0.13
   7   4   5    2.30    0.11
   5   7   4    2.11    0.12
  -7   4  -5    2.42    0.14
  -7   4  -5    2.36    0.11
   4   5   7    2.26    0.12
   5  -7  -4    2.52    0.12
  -5  -7   4    2.00    0.12
   4  -5  -7    2.37    0.13
   7  -4  -5    2.33    0.10
  -5  -7  -6   -0.04    0.04
  -5   7   6    0.02    0.03
   5  -7   6   -0.01    0.02
  -6   5   7   -0.02    0.03
  -6   5   7   -0.02    0.03
  -7  -6  -5    0.02    0.05
  -5  -7  -6   -0.07    0.03
   7   6  -5   -0.01    0.04
   7   6  -5   -0.01    0.02
   5   7  -6    0.03    0.03
   7  -6   5   -0.01    0.03
   7  -6   5   -0.01    0.02
   7   6  -5    0.03    0.04
  -7   6   5   -0.05    0.03
  -6  -5  -7    0.02    0.03
  -6  -5  -7   -0.06    0.05
  -6  -5  -7    0.08    0.04
  -7   6   5    0.00    0.03
   6  -5   7    0.01    0.02
   6   5  -7    0.00    0.03
   6   5  -7    0.01    0.05
   6   5  -7   -0.02    0.02
   6  -5   7    0.03    0.03
  -5  -7  -6    0.04    0.04
  -7  -6  -5    0.05    0.04
   5  -7   6   -0.02    0.03
  -5   7   6    0.01    0.04
   5   7  -6    0.04    0.03
   5   7  -6    0.04    0.05
   5  -7  -6    0.00    0.03
   5   7   6   -0.03    0.04
   5   7   6    0.01    0.04
   6  -5  -7    0.00    0.02
   6  -5  -7    0.04    0.04
  -6   5  -7    0.01    0.03
  -7   6  -5   -0.01    0.05
  -6  -5   7    0.02    0.03
  -6   5  -7    0.05    0.05
  -5  -7   6    0.05    0.04
  -7  -6   5    0.03    0.03
   6   5   7   -0.04    0.04
   6   5   7   -0.04    0.03
   6   5   7    0.06    0.04
   7  -6  -5    0.02    0.02
   7  -6  -5    0.07    0.04
  -7  -6   5    0.02    0.03
  -7  -6   5   -0.04    0.03
   6  -5  -7   -0.03    0.04
   5  -7  -6    0.01    0.04
  -6  -5   7   -0.01    0.02
  -5  -7   6    0.03    0.02
  -5  -7   6    0.04    0.04
   5  -7  -6    0.03    0.02
  -5   7  -6    0.02    0.05
  -5   7  -6    0.00    0.02
  -7   6  -5    0.01    0.03
   7   6   5    0.06    0.05
   7   6   5    0.04    0.04
   7  -6  -5   -0.02    0.04
   6   7  -1    0.27    0.04
  -1   6   7    0.22    0.04
  -7  -1  -6    0.32    0.04
  -7  -1  -6    0.23    0.06
   7  -1   6    0.24    0.03
   6   7  -1    0.30    0.05
  -7   1   6    0.22    0.04
  -7   1   6    0.28    0.04
  -6  -7  -1    0.23    0.05
  -6  -7  -1    0.23    0.05
  -1  -6  -7    0.25    0.04
   7  -1   6    0.19    0.04
   1  -6   7    0.23    0.04
   7   1  -6    0.23    0.04
   7   1  -6    0.19    0.06
  -6   7   1    0.21    0.05
  -6   7   1    0.27    0.04
  -1  -6  -7    0.21    0.04
   1   6  -7    0.27    0.04
  -1  -6  -7    0.26    0.04
  -1   6   7    0.31    0.05
   1   6  -7    0.25    0.06
  -7  -1  -6    0.38    0.05
   6  -7   1    0.27    0.04
  -1   6   7    0.30    0.03
  -6   7   1    0.29    0.04
  -7  -1   6    0.29    0.04
   7  -1  -6    0.33    0.04
   1  -6  -7    0.25    0.05
  -1   6  -7    0.24    0.06
  -6  -7   1    0.30    0.05
   6   7   1    0.29    0.05
   1   6   7    0.21    0.04
   7  -1  -6    0.26    0.05
   7  -1  -6    0.27    0.06
  -6  -7   1    0.32    0.05
  -7   1  -6    0.19    0.05
  -6   7  -1    0.22    0.05
  -6   7  -1    0.30    0.04
  -7  -1   6    0.23    0.04
   1  -6  -7    0.29    0.03
   6   7   1    0.24    0.05
  -6  -7   1    0.25    0.05
  -1  -6   7    0.32    0.05
  -1   6  -7    0.18    0.03
   6  -7  -1    0.32    0.04
   1  -6  -7    0.29    0.05
  -7   1  -6    0.25    0.03
   7   1   6    0.32    0.04
   1   6   7    0.20    0.05
   7   1   6    0.26    0.04
  -7   1  -6    0.27    0.05
   7   1   6    0.19    0.04
  -6   7   3   11.04    0.38
  -6   7   3   11.08    0.40
  -3  -6  -7   10.70    0.37
  -7  -3  -6   10.74    0.37
  -6   7   3   11.03    0.38
  -6  -7  -3   10.36    0.40
  -3   6   7   10.85    0.36
  -3   6   7   10.36    0.38
  -3   6   7   10.48    0.39
  -3  -6  -7   10.73    0.39
  -3  -6  -7   11.07    0.39
  -7  -3  -6   10.82    0.41
   3  -6   7   10.74    0.38
   3   6  -7   10.24    0.38
   3   6  -7    9.70    0.40
   3   6  -7    9.75    0.37
   7  -3   6   11.11    0.36
   7   3  -6   10.62    0.38
  -7  -3  -6   10.72    0.39
   6  -7   3    9.93    0.38
   6  -7   3   10.22    0.37
   6   7  -3   10.65    0.39
   6   7  -3   10.50    0.39
   7   3  -6   10.69    0.40
  -6  -7  -3   10.41    0.40
  -7   3   6    9.98    0.37
   7  -3   6   10.72    0.38
  -7   3   6   10.19    0.38
   7  -3  -6   10.16    0.39
   3   6   7   11.01    0.39
   6  -7  -3   10.86    0.37
   6   7   3   10.34    0.40
   7   3   6   10.38    0.39
   7  -3  -6   10.16    0.37
   7   3   6   10.39    0.38
   3  -6  -7   10.53    0.38
   6  -7  -3   11.15    0.39
   6   7   3   10.76    0.39
  -7  -3   6   10.90    0.38
  -7   3  -6   10.65    0.40
  -7   3  -6   10.55    0.38
   3  -6  -7   10.39    0.37
   3  -6  -7   10.40    0.39
  -3  -6   7   10.30    0.36
  -3  -6   7    9.79    0.38
   7  -3  -6    9.95    0.40
   7   3   6   10.58    0.37
  -6  -7   3   10.25    0.39
  -6   7  -3    9.91    0.40
  -6   7  -3   10.33    0.37
  -6  -7   3   10.23    0.39
  -6  -7   3   10.42    0.38
  -3   6  -7   11.15    0.36
  -7  -3   6   10.98    0.37
  -3   6  -7   11.16    0.38
  -3   6  -7   10.10    0.41
  -6  -7  -5    0.01    0.04
  -7   5   6   -0.03    0.03
   7   5  -6    0.02    0.02
  -6  -7  -5    0.04    0.05
   7   5  -6    0.02    0.03
   7   5  -6    0.01    0.05
   7  -5   6    0.04    0.02
   7  -5   6    0.03    0.03
  -5   6   7    0.01    0.03
  -5   6   7   -0.04    0.03
  -5  -6  -7    0.05    0.05
   6  -7   5    0.05    0.02
   6   7  -5    0.02    0.03
   5  -6   7   -0.04    0.03
   5  -6   7    0.00    0.03
   5   6  -7    0.02    0.03
   5   6  -7    0.02    0.05
   5   6  -7    0.09    0.03
  -5  -6  -7   -0.02    0.02
  -5  -6  -7    0.06    0.04
  -7  -5  -6   -0.01    0.05
  -7  -5  -6   -0.01    0.04
  -7   5   6    0.00    0.03
   6  -7   5   -0.04    0.03
  -7  -5  -6   -0.02    0.02
  -6   7   5    0.00    0.03
   6   7  -5    0.03    0.05
  -6   7   5    0.03    0.03
   6   7   5    0.02    0.04
   7  -5  -6    0.00    0.02
   6   7   5   -0.01    0.04
   5  -6  -7    0.05    0.04
   5  -6  -7    0.05    0.04
   6  -7  -5    0.02    0.02
   6  -7  -5   -0.04    0.03
  -7  -5   6   -0.08    0.02
  -7  -5   6   -0.01    0.03
  -7   5  -6    0.09    0.05
  -7   5  -6    0.02    0.03
   7   5   6    0.00    0.03
   6  -7  -5    0.03    0.04
   7   5   6    0.02    0.05
   7   5   6    0.01    0.03
  -6  -7   5   -0.02    0.02
  -6  -7   5    0.02    0.04
  -6  -7   5    0.01    0.04
  -6   7  -5   -0.01    0.05
  -6   7  -5    0.00    0.02
   7  -5  -6    0.01    0.04
   7  -5  -6   -0.02    0.04
   5   6   7    0.02    0.04
   5   6   7    0.01    0.04
   5  -6  -7    0.01    0.01
  -5  -6   7    0.03    0.02
  -5  -6   7    0.00    0.04
  -5   6  -7    0.11    0.06
  -5   6  -7    0.01    0.02
  -7  -7   0   -0.02    0.04
  -7  -7   0    0.02    0.04
  -7   0  -7   -0.01    0.03
  -7   0  -7    0.02    0.04
  -7   0  -7    0.00    0.03
  -7   0   7   -0.01    0.03
  -7   0   7    0.00    0.03
  -7   7   0    0.05    0.04
  -7   7   0    0.02    0.02
  -7   7   0    0.06    0.03
   0  -7  -7    0.01    0.03
   0  -7  -7    0.01    0.03
   0  -7  -7   -0.01    0.03
   0  -7   7   -0.03    0.03
   0   7  -7    0.14    0.03
   0   7  -7    0.02    0.05
   0   7   7    0.05    0.03
   0   7   7    0.04    0.04
   7  -7   0    0.03    0.03
   7   0  -7    0.01    0.02
   7   0  -7    0.00    0.05
   7   0   7    0.01    0.03
   7   0   7    0.02    0.03
   7   0   7   -0.01    0.02
   7   7   0   -0.05    0.04
   7   7   0    0.05    0.03
  -7  -7  -2   16.34    0.59
  -7  -7  -2   16.01    0.59
   7  -2   7   15.43    0.57
   7  -2   7   15.93    0.56
   7   2  -7   16.45    0.56
  -7  -2  -7   16.47    0.57
  -7  -2  -7   15.68    0.59
  -7  -2  -7   16.10    0.57
   7  -7   2   17.23    0.55
   2   7  -7   16.68    0.57
   7   7  -2   15.92    0.59
   7   7  -2   16.25    0.57
  -2  -7  -7   16.87    0.57
  -7   2   7   17.12    0.57
  -7   2   7   16.52    0.57
   7   2  -7   16.72    0.60
   7   2  -7   16.83    0.57
  -7   7   2   15.83    0.59
  -7   7   2   16.28    0.57
  -7   7   2   16.82    0.57
  -2   7   7   15.85    0.58
  -2  -7  -7   16.47    0.58
  -2  -7  -7   15.59    0.58
   2   7  -7   16.66    0.60
   2  -7   7   16.45    0.57
   7  -7   2   16.98    0.57
  -2   7   7   16.16    0.55
  -2   7   7   15.95    0.58
  -7   2  -7   16.12    0.55
   2  -7  -7   16.09    0.56
   2  -7  -7   15.81    0.58
  -2   7  -7   16.40    0.60
  -2   7  -7   16.71    0.57
  -7  -2   7   17.04    0.57
  -2  -7   7   16.37    0.58
   2   7   7   15.99    0.57
   2   7   7   15.98    0.58
   7  -7  -2   16.47    0.56
   7  -7  -2   16.54    0.58
   2  -7  -7   15.53    0.57
  -7  -2   7   16.99    0.57
   7  -2  -7   17.01    0.56
   7  -2  -7   16.48    0.59
   7  -2  -7   17.08    0.60
  -7  -7   2   16.08    0.58
  -7  -7   2   15.99    0.59
  -7  -7   2   16.29    0.58
  -7   7  -2   16.25    0.59
  -7   7  -2   16.49    0.56
   7   2   7   16.25    0.58
   7   2   7   16.85    0.56
   7   2   7   16.18    0.57
  -7   2  -7   15.54    0.59
  -7   2  -7   16.05    0.58
   7   7   2   16.39    0.59
   7   7   2   16.21    0.58
  -7  -7  -4   -0.01    0.05
  -7  -7  -4   -0.03    0.04
   7  -4   7   -0.01    0.03
   7  -4   7    0.03    0.02
   7   4  -7    0.02    0.03
  -7  -4  -7    0.04    0.03
  -7  -4  -7    0.06    0.05
  -7  -4  -7    0.05    0.04
   7  -7   4    0.01    0.02
   4   7  -7    0.06    0.03
   7   7  -4   -0.03    0.04
   7   7  -4    0.04    0.05
  -7   4   7    0.00    0.03
  -7   4   7    0.00    0.03
   4  -7   7    0.02    0.03
   7   4  -7   -0.04    0.05
  -7   7   4    0.01    0.03
  -7   7   4    0.00    0.03
  -4  -7  -7    0.02    0.02
  -4  -7  -7    0.02    0.04
  -4  -7  -7    0.05    0.04
   7  -7   4    0.04    0.03
  -4   7   7    0.01    0.04
   4   7  -7    0.06    0.05
   7   4  -7    0.01    0.03
  -4   7   7   -0.01    0.03
  -4   7   7    0.00    0.02
  -4   7  -7    0.00    0.02
  -4  -7   7    0.04    0.04
   4  -7  -7    0.04    0.03
   4  -7  -7    0.01    0.04
   4  -7  -7   -0.02    0.03
  -7   7  -4    0.04    0.05
  -7  -4   7    0.02    0.03
  -4   7  -7   -0.03    0.03
   4   7   7   -0.03    0.04
   4   7   7   -0.01    0.04
   7  -7  -4    0.01    0.02
   7  -7  -4    0.02    0.04
  -4  -7   7    0.02    0.02
  -7  -4   7   -0.03    0.02
   7  -4  -7   -0.01    0.02
   7  -4  -7   -0.09    0.04
   7  -4  -7    0.06    0.05
  -7  -7   4    0.02    0.03
  -7  -7   4    0.02    0.04
  -7  -7   4    0.02    0.04
  -7   7  -4    0.02    0.02
  -4   7  -7    0.03    0.05
   7   4   7   -0.01    0.04
   7   4   7    0.02    0.03
   7   4   7   -0.01    0.03
  -7   4  -7    0.00    0.05
  -7   4  -7    0.01    0.03
   7   7   4   -0.03    0.05
   7   7   4    0.08    0.04
  -7  -7  -6    5.83    0.26
  -7  -7  -6    5.45    0.24
   6   7  -7    5.65    0.21
   7  -6   7    5.70    0.23
  -7  -6  -7    5.79    0.21
  -7  -6  -7    5.84    0.26
  -7  -6  -7    5.47    0.24
   7   6  -7    5.72    0.21
   7  -7   6    5.74    0.23
   7  -7   6    5.77    0.21
   7   7  -6    5.84    0.23
  -7   6   7    5.63    0.23
  -7   6   7    5.37    0.23
   6  -7   7    5.69    0.21
   7  -6   7    5.73    0.21
  -7   7   6    5.49    0.23
  -7   7   6    5.55    0.23
  -6  -7  -7    5.87    0.20
  -6  -7  -7    5.63    0.24
  -6  -7  -7    5.48    0.25
  -6  -7  -7    5.56    0.24
   7   7  -6    5.85    0.25
   7   7  -6    5.87    0.21
   7   6  -7    5.90    0.23
   7   6  -7    5.36    0.25
  -6   7   7    5.97    0.23
  -6   7   7    5.72    0.23
   6   7  -7    5.51    0.25
   6   7  -7    5.47    0.23
   6  -7   7    5.48    0.23
   6  -7  -7    5.76    0.25
  -7   7  -6    5.25    0.26
   6  -7  -7    5.75    0.23
   6  -7  -7    5.85    0.20
  -7  -7   6    5.74    0.21
   6   7   7    5.97    0.24
   6   7   7    5.73    0.24
   7  -7  -6    5.69    0.21
   7  -7  -6    5.87    0.24
   7  -7  -6    5.75    0.25
  -7  -6   7    5.58    0.23
  -7   6  -7    5.40    0.26
   7  -6  -7    5.72    0.20
   7  -6  -7    5.08    0.23
   7  -6  -7    5.57    0.25
  -7  -7   6    5.71    0.23
  -7   7  -6    5.60    0.21
  -6   7  -7    5.30    0.26
  -6   7  -7    5.69    0.21
  -7  -6   7    5.68    0.21
   7   6   7    5.56    0.24
   7   6   7    5.80    0.24
  -7   6  -7    5.84    0.21
  -6  -7   7    5.79    0.21
  -6  -7   7    5.42    0.23
   7   7   6    5.52    0.25
   7   7   6    5.68    0.24
  -8   0   0  546.61   18.66
  -8   0   0  553.61   18.68
  -8   0   0  566.28   18.57
   0  -8   0  545.00   18.62
   0  -8   0  565.78   18.67
   0   0  -8  577.43   18.68
   0   0  -8  575.82   18.70
   0   0  -8  562.39   18.63
   0   0   8  580.30   18.59
   0   0   8  572.30   18.67
   0   8   0  538.73   18.66
   0   8   0  594.14   18.64
   0   8   0  563.74   18.70
   8   0   0  549.69   18.68
   8   0   0  558.27   18.69
   0   8  -2    0.10    0.03
   0   8  -2    0.16    0.04
   0   8   2    0.13    0.03
   0   8   2    0.13    0.03
   0   8   2    0.11    0.04
   2   0  -8    0.13    0.02
   2   0  -8    0.10    0.05
   2   0  -8    0.10    0.04
   2   0   8    0.15    0.03
   2   0   8    0.14    0.03
   8  -2   0    0.14    0.04
   8  -2   0    0.16    0.04
   8   2   0    0.12    0.05
   8   2   0    0.13    0.04
   8   2   0    0.09    0.03
  -2   0  -8    0.15    0.04
  -2   0   8    0.13    0.03
  -2   0   8    0.07    0.03
   0  -8  -2    0.13    0.03
   0  -8  -2    0.13    0.03
   0  -8   2    0.10    0.02
   0  -8   2    0.13    0.04
   0  -8   2    0.10    0.03
  -8  -2   0    0.10    0.03
  -8  -2   0    0.13    0.03
  -8   2   0    0.06    0.04
  -8   2   0    0.10    0.03
  -2   0  -8    0.06    0.04
  -2   0  -8    0.09    0.05
  -8  -2   0    0.22    0.04
   0   8   4    8.71    0.34
   4   0  -8    9.16    0.31
   4   0  -8    8.94    0.35
   4   0  -8    8.54    0.33
   4   0   8    9.16    0.32
   4   0   8    9.28    0.33
   8  -4   0    9.18    0.33
   8  -4   0    9.03    0.34
   8   4   0    8.93    0.34
   8   4   0    9.30    0.32
   0   8   4    9.19    0.32
   0  -8  -4    8.57    0.33
   0  -8   4    9.30    0.31
   0  -8   4    8.68    0.33
   0  -8   4    8.46    0.33
   0   8  -4    8.94    0.33
   0   8  -4    8.57    0.34
  -8   4   0    8.66    0.34
  -8   4   0    9.19    0.33
  -4   0  -8    9.27    0.34
  -4   0  -8    9.23    0.34
  -4   0   8    9.02    0.32
  -4   0   8    8.62    0.33
   0  -8  -4    9.45    0.32
   0  -8  -4    9.03    0.32
   8   4   0    9.25    0.35
  -8  -4   0    9.46    0.33
  -8  -4   0    9.26    0.34
  -8  -4   0    8.62    0.34
   6   0  -8    1.41    0.07
   6   0  -8    1.63    0.09
   6   0   8    1.77    0.09
   6   0   8    1.98    0.09
   8  -6   0    1.43    0.09
   8  -6   0    1.70    0.10
   8   6   0    1.45    0.11
  -8  -6   0    1.63    0.11
   6   0  -8    1.39    0.12
  -8  -6   0    1.66    0.10
   0   8   6    1.77    0.11
  -6   0   8    1.49    0.09
  -6   0   8    1.58    0.09
   0  -8  -6    1.76    0.09
   0  -8  -6    1.73    0.09
   0  -8  -6    1.70    0.09
   0  -8   6    1.52    0.08
   0  -8   6    1.56    0.09
   0   8  -6    1.45    0.09
   8   6   0    1.71    0.09
   0   8   6    1.64    0.08
  -8  -6   0    1.82    0.11
   0   8  -6    1.47    0.12
  -8   6   0    1.69    0.11
  -8   6   0    1.46    0.09
  -8   6   0    1.64    0.07
  -6   0  -8    1.71    0.11
  -6   0  -8    1.84    0.12
   1   8  -1    0.00    0.03
  -8  -1  -1    0.03    0.03
  -8  -1  -1    0.00    0.02
   8  -1   1    0.00    0.03
   8   1  -1    0.04    0.04
   8   1  -1    0.02    0.04
   1   8  -1    0.08    0.03
  -8   1   1   -0.02    0.03
  -8  -1  -1   -0.02    0.03
  -8   1   1   -0.01    0.01
  -1  -8  -1   -0.02    0.02
  -1  -8  -1    0.03    0.03
  -1  -8  -1    0.03    0.04
   1  -1   8    0.02    0.02
   1  -1   8    0.00    0.03
  -1  -1  -8   -0.02    0.04
  -1  -1  -8    0.02    0.04
  -1  -1  -8    0.01    0.03
  -1   8   1   -0.03    0.03
  -1   8   1   -0.01    0.02
   1   8  -1    0.00    0.02
  -8   1   1    0.02    0.03
  -8  -1  -1    0.02    0.03
  -1   1   8    0.00    0.02
  -1   1   8    0.01    0.02
  -1   1   8    0.01    0.03
   1   1  -8    0.00    0.02
   1   1  -8   -0.03    0.05
   1   1  -8    0.07    0.04
   8   1  -1    0.01    0.03
  -1   8   1    0.00    0.02
   1  -8   1   -0.01    0.03
   8  -1   1    0.00    0.03
  -1   8   1    0.03    0.04
  -1  -1   8    0.00    0.02
  -1   8  -1    0.02    0.03
  -1  -1   8   -0.02    0.03
  -1  -8   1   -0.01    0.02
  -1  -8   1   -0.05    0.03
  -1   8  -1    0.00    0.02
  -1   8  -1   -0.02    0.03
  -1   8  -1   -0.02    0.02
   1   1   8    0.01    0.02
   1   1   8   -0.02    0.03
   1  -1  -8    0.02    0.04
  -1   1  -8   -0.02    0.04
   1   8   1    0.04    0.03
   1   8   1    0.02    0.03
   1  -1  -8    0.09    0.05
   8   1   1    0.03    0.03
  -8   1  -1    0.03    0.03
   8   1   1    0.03    0.04
   1   8   1   -0.02    0.03
  -8  -1   1    0.01    0.02
  -1   1  -8    0.00    0.03
   8  -1  -1    0.03    0.03
   8  -1  -1    0.05    0.04
  -1   1  -8   -0.04    0.04
  -8  -1   1    0.04    0.03
  -8   1  -1    0.00    0.03
  -1  -8  -3    0.01    0.03
   8   3  -1   -0.02    0.04
   8   3  -1   -0.03    0.04
  -8  -3  -1    0.06    0.04
   1  -8   3    0.04    0.03
   1   8  -3    0.05    0.03
  -3  -1  -8    0.01    0.05
  -3  -1  -8    0.07    0.04
  -8   3   1    0.07    0.04
   3  -1   8    0.07    0.03
   3  -1   8    0.07    0.03
   3   1  -8    0.04    0.02
   3   1  -8    0.07    0.05
   3   1  -8    0.05    0.03
   8  -3   1    0.07    0.03
   8  -3   1    0.06    0.03
   8   3  -1    0.03    0.03
  -8   3   1    0.05    0.03
  -3  -1  -8    0.09    0.04
  -8  -3  -1    0.06    0.04
  -1  -8  -3    0.08    0.03
  -1   8   3    0.07    0.02
  -1   8   3    0.08    0.03
  -1   8   3    0.03    0.03
  -1   8   3    0.10    0.04
   1  -8   3    0.03    0.03
  -3   1   8    0.05    0.03
  -3   1   8    0.04    0.03
   1   8  -3    0.05    0.04
  -3   1  -8    0.12    0.05
   3  -1  -8    0.04    0.03
  -1   8  -3    0.03    0.02
   3  -1  -8    0.03    0.05
  -1  -8   3    0.06    0.03
  -1  -8   3    0.02    0.03
   8   3   1   -0.01    0.04
   8   3   1    0.04    0.04
  -3   1  -8    0.06    0.04
   3   1   8    0.03    0.03
  -3  -1   8    0.03    0.02
   8   3   1    0.09    0.03
  -8  -3   1    0.05    0.04
  -8  -3   1    0.06    0.03
  -8   3  -1    0.03    0.04
  -8   3  -1    0.05    0.03
   1   8   3    0.06    0.03
   1   8   3    0.05    0.03
   1   8   3    0.06    0.04
  -1  -8   3    0.04    0.03
  -1   8  -3   -0.01    0.02
  -3  -1   8    0.03    0.03
  -1   8  -3    0.08    0.04
   8   3   1    0.06    0.03
  -8  -3   1    0.03    0.03
   8  -3  -1    0.03    0.03
   8  -3  -1    0.02    0.03
   3   1   8    0.02    0.03
  -1  -8  -5    0.89    0.07
  -8   5   1    1.00    0.05
  -8   5   1    0.85    0.08
  -8   5   1    0.98    0.07
   5   1  -8    0.99    0.05
   5   1  -8    0.80    0.09
  -5   1   8    0.81    0.06
  -5   1   8    0.96    0.07
  -1  -8  -5    1.02    0.06
  -1   8   5    0.82    0.06
  -1   8   5    0.99    0.07
  -1   8   5    0.85    0.08
  -5  -1  -8    0.91    0.09
   8   5  -1    0.87    0.07
   1  -8   5    1.01    0.06
   1  -8   5    1.06    0.07
   5   1  -8    0.86    0.07
   8  -5   1    0.98    0.08
   8   5  -1    0.73    0.08
  -8  -5  -1    0.86    0.08
   1   8  -5    0.87    0.07
   8  -5   1    0.90    0.07
   5  -1   8    0.90    0.06
   1   8  -5    0.90    0.09
  -1  -8  -5    0.82    0.07
  -8  -5  -1    0.88    0.08
  -5  -1  -8    0.81    0.07
   5  -1   8    0.91    0.07
   1   8   5    0.99    0.07
  -1   8  -5    0.89    0.09
  -1  -8   5    0.94    0.07
  -8   5  -1    0.87    0.08
  -5   1  -8    0.84    0.08
   5  -1  -8    0.91    0.04
   1   8   5    0.95    0.08
  -5  -1   8    0.80    0.07
  -5   1  -8    0.85    0.08
   1  -8  -5    0.80    0.07
  -8   5  -1    0.88    0.06
   5  -1  -8    0.98    0.07
   8   5   1    0.81    0.07
   5   1   8    0.88    0.07
  -1  -8   5    0.93    0.07
   8  -5  -1    1.01    0.08
   5  -1  -8    0.88    0.09
  -8  -5   1    0.82    0.07
  -1   8  -5    0.97    0.07
  -5  -1   8    0.89    0.06
   5   1   8    0.91    0.07
   8   5   1    0.97    0.06
   1  -8  -5    0.94    0.07
  -8  -5   1    0.86    0.08
  -8  -5   1    0.92    0.07
   8  -5  -1    1.01    0.06
   8   5   1    0.91    0.09
  -7  -1  -8    0.19    0.05
   8  -7   1    0.26    0.04
  -1   8   7    0.28    0.03
  -1  -8  -7    0.30    0.05
  -1   8   7    0.27    0.05
  -1   8   7    0.30    0.06
   8   7  -1    0.35    0.06
   8   7  -1    0.31    0.05
  -8   7   1    0.34    0.06
  -7   1   8    0.30    0.04
  -7   1   8    0.26    0.04
   1   8  -7    0.23    0.07
  -7  -1  -8    0.16    0.06
   7   1  -8    0.28    0.07
   7   1  -8    0.32    0.05
   8  -7   1    0.32    0.03
  -8   7   1    0.23    0.04
  -8  -7  -1    0.21    0.06
   1  -8   7    0.26    0.03
   1  -8   7    0.30    0.05
  -8   7   1    0.19    0.04
  -1  -8  -7    0.18    0.04
  -7  -1  -8    0.22    0.04
  -8  -7  -1    0.16    0.06
   7  -1   8    0.24    0.05
   7  -1   8    0.22    0.04
   7   1  -8    0.32    0.04
  -1  -8  -7    0.22    0.04
   1   8  -7    0.26    0.04
  -1  -8   7    0.26    0.05
  -7   1  -8    0.27    0.05
   1  -8  -7    0.32    0.05
  -7  -1   8    0.24    0.04
   8   7   1    0.29    0.03
  -8  -7   1    0.20    0.05
   7   1   8    0.25    0.04
   8  -7  -1    0.27    0.04
   1   8   7    0.26    0.04
   1   8   7    0.25    0.05
   7   1   8    0.26    0.05
   7  -1  -8    0.32    0.07
   7  -1  -8    0.26    0.04
   8   7   1    0.12    0.04
  -1   8  -7    0.29    0.04
  -1   8  -7    0.24    0.07
  -8   7  -1    0.22    0.06
  -8   7  -1    0.27    0.04
   8   7   1    0.17    0.06
  -8  -7   1    0.26    0.05
   1  -8  -7    0.25    0.05
  -7   1  -8    0.35    0.06
  -7   1  -8    0.29    0.04
   7  -1  -8    0.26    0.03
   1  -8  -7    0.24    0.03
  -8  -7   1    0.25    0.05
  -1  -8   7    0.28    0.04
   8  -7  -1    0.32    0.05
  -7  -1   8    0.27    0.05
   7   1   8    0.19    0.03
  -2  -8   0    0.15    0.02
  -8   0   2    0.14    0.02
  -2   8   0    0.14    0.04
  -2   8   0    0.10    0.03
  -8   0  -2    0.10    0.04
   0   2  -8    0.12    0.03
  -8   0   2    0.08    0.03
   8   0   2    0.17    0.02
   2   8   0    0.18    0.04
   2   8   0    0.15    0.03
  -8   0  -2    0.11    0.03
   0   2   8    0.16    0.04
   0   2  -8    0.11    0.03
   0   2  -8    0.04    0.05
   0   2  -8    0.13    0.05
  -8   0  -2    0.07    0.03
   0   2   8    0.09    0.02
   0  -2   8    0.12    0.03
  -2  -8   0    0.16    0.04
  -2  -8   0    0.09    0.04
  -2   8   0    0.12    0.03
   8   0  -2    0.13    0.04
   0  -2  -8    0.15    0.04
  -2   8   0    0.15    0.04
   8   0  -2    0.12    0.04
   8   0   2    0.12    0.04
   8   0   2    0.09    0.04
   0  -2  -8    0.11    0.05
   8   0  -2    0.13    0.04
   2   8   0    0.10    0.04
  -8   2   2    0.99    0.05
   2  -8   2    0.94    0.07
   2  -8   2    0.96    0.07
   2   8  -2    1.09    0.07
   8   2  -2    1.10    0.08
  -2   8   2    1.10    0.08
   2  -2   8    1.12    0.06
   2   2  -8    1.11    0.08
   2   2  -8    0.90    0.09
  -2  -8  -2    1.24    0.09
  -2   2   8    1.09    0.08
  -2  -2  -8    0.99    0.08
  -2  -2  -8    1.18    0.08
  -8  -2  -2    1.12    0.08
  -2   2   8    1.16    0.07
   2   2  -8    1.09    0.06
   2   8  -2    1.21    0.08
   8   2  -2    1.16    0.09
   8   2  -2    0.98    0.09
  -2  -2  -8    1.16    0.08
  -8  -2  -2    1.06    0.07
  -8  -2  -2    0.97    0.08
  -2   8   2    1.19    0.06
  -2   8   2    1.05    0.08
  -2   8   2    1.23    0.07
   8  -2   2    1.19    0.08
   8  -2   2    1.18    0.08
   2  -2   8    1.03    0.07
  -8   2   2    1.03    0.07
  -2  -8  -2    0.90    0.07
  -2  -8  -2    1.12    0.06
  -8   2  -2    1.30    0.09
   2  -2  -8    0.90    0.07
  -2   2  -8    1.06    0.08
  -2  -8   2    1.16    0.07
   8   2   2    1.22    0.08
  -8  -2   2    1.02    0.07
  -2   2  -8    0.97    0.09
  -2  -2   8    1.18    0.08
   2   2   8    1.13    0.07
   2   8   2    0.93    0.08
   2  -2  -8    1.21    0.10
   8   2   2    1.03    0.08
   2   8   2    1.09    0.06
  -8   2  -2    1.07    0.08
   8  -2  -2    1.02    0.07
   8  -2  -2    0.99    0.08
   2   2   8    1.10    0.07
  -2   8  -2    0.94    0.08
  -8  -2   2    1.11    0.06
  -2  -2   8    1.06    0.06
  -2   8  -2    1.09    0.06
  -2  -8   2    1.05    0.08
  -2  -8   2    1.16    0.08
  -2   8  -2    1.15    0.07
   8   2   2    1.04    0.06
   4  -2   8    0.26    0.04
  -2  -8  -4    0.21    0.04
   4   2  -8    0.22    0.03
  -2   8   4    0.32    0.05
  -2   8   4    0.25    0.04
  -8  -4  -2    0.21    0.05
  -2  -8  -4    0.28    0.03
  -4   2   8    0.21    0.04
   2  -8   4    0.27    0.04
  -4  -2  -8    0.25    0.05
   4   2  -8    0.20    0.06
  -8   4   2    0.33    0.05
  -8   4   2    0.18    0.04
  -4   2   8    0.28    0.04
  -8   4   2    0.23    0.03
  -2   8   4    0.29    0.03
  -4  -2  -8    0.23    0.06
  -4  -2  -8    0.23    0.05
   8  -4   2    0.26    0.04
   8  -4   2    0.26    0.04
   8   4  -2    0.35    0.06
   4  -2   8    0.25    0.04
  -8  -4  -2    0.24    0.05
   8   4  -2    0.27    0.04
   4   2  -8    0.23    0.04
  -2  -8  -4    0.21    0.04
   2   8  -4    0.30    0.06
   2  -8   4    0.20    0.04
   2   8  -4    0.20    0.04
  -2   8  -4    0.25    0.02
   2   8   4    0.23    0.04
   8   4   2    0.16    0.05
   2  -8  -4    0.34    0.05
  -4   2  -8    0.32    0.06
   8  -4  -2    0.19    0.04
  -8  -4   2    0.22    0.05
  -8  -4   2    0.28    0.04
  -8   4  -2    0.25    0.05
   4   2   8    0.23    0.04
   4   2   8    0.21    0.04
   8  -4  -2    0.20    0.03
  -8   4  -2    0.27    0.04
   2   8   4    0.22    0.05
   4  -2  -8    0.20    0.05
   4  -2  -8    0.16    0.04
  -4   2  -8    0.21    0.05
  -2  -8   4    0.26    0.04
  -2  -8   4    0.28    0.05
  -2   8  -4    0.17    0.03
  -2   8  -4    0.18    0.05
  -4  -2   8    0.21    0.04
  -2  -8   4    0.25    0.03
  -8  -4   2    0.27    0.04
   8   4   2    0.23    0.06
  -4  -2   8    0.23    0.03
   8   4   2    0.23    0.04
   2  -8   6    3.18    0.12
   8  -6   2    2.96    0.14
  -8   6   2    3.21    0.13
   8   6  -2    2.77    0.15
   8   6  -2    3.11    0.14
  -8   6   2    2.77    0.16
  -8   6   2    2.88    0.14
  -2   8   6    3.19    0.14
   6   2  -8    3.24    0.14
   6   2  -8    3.21    0.13
   8  -6   2    3.38    0.12
  -8  -6  -2    3.04    0.16
  -6  -2  -8    3.21    0.17
  -8  -6  -2    2.95    0.16
   2   8  -6    3.05    0.14
   6  -2   8    3.00    0.14
  -2   8   6    3.03    0.12
  -6  -2  -8    3.32    0.15
  -6   2   8    3.29    0.14
  -6   2   8    3.30    0.14
  -2  -8  -6    3.26    0.13
  -2  -8  -6    2.99    0.14
   6   2  -8    3.07    0.17
   2   8  -6    3.38    0.17
  -2   8   6    2.97    0.15
   2  -8   6    3.34    0.14
   6  -2   8    3.18    0.13
  -6   2  -8    3.07    0.12
  -2  -8   6    3.26    0.14
  -6  -2   8    3.12    0.14
   8   6   2    3.32    0.16
  -2  -8   6    3.04    0.15
   6  -2  -8    3.23    0.14
   8  -6  -2    3.12    0.13
  -8  -6   2    3.05    0.15
  -8  -6   2    3.01    0.15
  -8  -6   2    2.81    0.14
  -8   6  -2    2.86    0.16
  -8   6  -2    2.98    0.13
   6  -2  -8    3.10    0.16
   8   6   2    3.30    0.12
   8   6   2    3.28    0.15
   8  -6  -2    3.00    0.15
  -6   2  -8    2.95    0.16
  -6  -2   8    3.08    0.13
   2   8   6    3.15    0.14
   2   8   6    3.05    0.15
  -2   8  -6    2.76    0.16
   6  -2  -8    3.52    0.17
  -2   8  -6    3.02    0.14
   6   2   8    2.96    0.14
   2  -8  -6    2.86    0.14
   2  -8  -6    3.11    0.13
   6   2   8    3.28    0.13
  -6   2  -8    2.99    0.15
   6   2   8    3.04    0.14
   2  -8  -6    2.95    0.14
   8  -1   3    0.10    0.04
  -3   8   1    0.05    0.03
  -3   8   1    0.08    0.04
  -3  -8  -1    0.04    0.03
  -1  -3  -8    0.11    0.04
  -1  -3  -8    0.12    0.04
  -1  -3  -8    0.01    0.03
   1   3  -8    0.00    0.04
  -3  -8  -1    0.03    0.04
  -8   1   3    0.06    0.03
  -3   8   1    0.03    0.03
  -3  -8  -1    0.04    0.02
  -1   3   8    0.06    0.02
  -1   3   8    0.10    0.03
   1  -3   8    0.01    0.03
   8   1  -3    0.09    0.04
   3   8  -1    0.04    0.03
   3   8  -1    0.08    0.03
   1   3  -8    0.03    0.02
   1   3  -8    0.03    0.05
  -8   1   3    0.06    0.02
   8   1  -3    0.07    0.04
  -8  -1  -3    0.07    0.03
  -8  -1  -3    0.02    0.04
  -8  -1  -3    0.04    0.03
  -1   3   8    0.01    0.03
  -3   8   1    0.06    0.03
   8  -1   3    0.08    0.03
   8   1  -3    0.01    0.04
  -8  -1   3    0.04    0.02
   3   8   1    0.07    0.04
  -1   3  -8    0.06    0.03
  -1   3  -8    0.07    0.05
   8   1   3    0.06    0.02
   1   3   8    0.06    0.03
   8   1   3    0.01    0.04
  -1  -3   8    0.02    0.02
   8   1   3    0.02    0.03
  -8  -1   3    0.07    0.03
   1  -3  -8    0.07    0.05
   1  -3  -8    0.09    0.04
   1   3   8    0.04    0.03
  -3   8  -1    0.04    0.02
   3   8   1    0.01    0.03
   3   8   1    0.03    0.02
  -3   8  -1    0.05    0.03
  -3   8  -1    0.01    0.04
  -1  -3   8    0.02    0.03
  -3   8  -1    0.06    0.03
  -8   1  -3    0.03    0.04
  -8   1  -3    0.01    0.03
  -1   3  -8    0.06    0.03
   8  -1  -3    0.01    0.03
   8  -1  -3    0.03    0.04
  -3  -8   1    0.05    0.04
   8  -1  -3    0.05    0.04
  -3  -8   1    0.04    0.04
  -3   8   3    0.03    0.02
   3  -3   8    0.03    0.03
   3   3  -8    0.00    0.02
   8   3  -3    0.03    0.04
  -3  -3  -8    0.00    0.03
  -3   3   8   -0.02    0.03
  -3   3   8   -0.02    0.03
   3   8  -3    0.00    0.03
   3   8  -3   -0.01    0.04
   3   3  -8    0.04    0.04
  -8  -3  -3    0.00    0.03
   3  -8   3    0.02    0.03
   3  -8   3   -0.01    0.02
  -3   8   3    0.00    0.04
   8  -3   3    0.01    0.03
   8  -3   3    0.04    0.03
  -3   8   3   -0.01    0.03
  -3  -8  -3    0.03    0.03
  -3  -8  -3   -0.01    0.03
  -3  -8  -3    0.01    0.04
  -8  -3  -3    0.01    0.04
   3  -3   8    0.00    0.02
  -8   3   3    0.03    0.03
  -3  -3  -8    0.04    0.03
  -3  -3  -8    0.00    0.04
   3   3  -8   -0.01    0.05
  -8   3   3    0.00    0.02
  -8  -3  -3    0.01    0.02
  -3   8   3   -0.01    0.03
   8   3  -3   -0.04    0.03
  -8  -3   3    0.02    0.03
   3   8   3    0.01    0.04
  -3   3  -8   -0.04    0.04
  -3  -3   8    0.04    0.02
  -8   3  -3    0.01    0.03
  -3   8  -3   -0.01    0.02
  -8   3  -3   -0.01    0.04
   8   3   3   -0.01    0.03
  -3  -8   3    0.01    0.03
  -3  -8   3    0.05    0.04
  -3  -8   3    0.03    0.03
  -3  -3   8   -0.01    0.03
  -8  -3   3    0.01    0.03
  -3   3  -8    0.00    0.03
   3   3   8    0.00    0.03
   3   3   8    0.02    0.03
  -3   8  -3    0.02    0.03
  -3   8  -3    0.08    0.05
   8   3   3   -0.02    0.03
   3   8   3   -0.03    0.04
   8  -3  -3   -0.02    0.03
   8  -3  -3   -0.02    0.03
   8  -3  -3    0.01    0.04
   8   3   3    0.04    0.04
   3  -3  -8    0.06    0.03
   3  -3  -8   -0.02    0.04
  -8  -5  -3    0.48    0.07
   5   3  -8    0.62    0.05
  -5  -3  -8    0.50    0.06
   5  -3   8    0.46    0.05
  -8  -5  -3    0.53    0.07
  -5   3   8    0.61    0.06
   5   3  -8    0.54    0.08
   8  -5   3    0.57    0.03
  -3   8   5    0.52    0.04
  -8   5   3    0.57    0.07
  -8   5   3    0.51    0.05
  -8   5   3    0.62    0.05
   3  -8   5    0.62    0.05
  -5  -3  -8    0.55    0.07
   3  -8   5    0.63    0.05
   3   8  -5    0.63    0.06
   3   8  -5    0.70    0.08
   8  -5   3    0.64    0.06
  -3   8   5    0.41    0.05
  -5   3   8    0.71    0.06
  -3  -8  -5    0.57    0.04
  -3  -8  -5    0.56    0.06
  -3  -8  -5    0.53    0.06
  -3   8   5    0.49    0.06
   5   3  -8    0.66    0.06
  -8  -5  -3    0.54    0.04
   8   5  -3    0.52    0.07
   5  -3   8    0.54    0.05
   8   5  -3    0.50    0.06
  -3  -8   5    0.60    0.04
   3  -8  -5    0.56    0.05
  -5  -3   8    0.62    0.05
  -8  -5   3    0.46    0.06
  -5   3  -8    0.46    0.05
   3   8   5    0.45    0.06
   3   8   5    0.48    0.07
   5  -3  -8    0.54    0.06
   5  -3  -8    0.62    0.08
   5  -3  -8    0.57    0.06
   5   3   8    0.60    0.04
   3  -8  -5    0.55    0.06
   8  -5  -3    0.59    0.05
   8  -5  -3    0.56    0.06
  -3  -8   5    0.68    0.06
  -8  -5   3    0.57    0.06
  -3   8  -5    0.59    0.06
  -5   3  -8    0.42    0.07
   8   5   3    0.58    0.06
  -8   5  -3    0.63    0.05
  -8   5  -3    0.49    0.07
  -5  -3   8    0.66    0.06
  -8  -5   3    0.58    0.06
   8   5   3    0.55    0.07
  -3  -8   5    0.58    0.06
  -3   8  -5    0.69    0.08
   8   5   3    0.56    0.06
  -3   8  -5    0.61    0.04
   5   3   8    0.45    0.06
   5   3   8    0.57    0.06
  -3   8   7    0.56    0.07
   7   3  -8    0.67    0.06
  -8  -7  -3    0.68    0.08
   3   8  -7    0.67    0.06
  -3   8   7    0.56    0.04
  -3   8   7    0.46    0.06
  -7  -3  -8    0.71    0.06
  -3  -8  -7    0.75    0.05
  -7  -3  -8    0.67    0.07
   8   7  -3    0.49    0.07
   8   7  -3    0.54    0.06
  -8   7   3    0.64    0.06
  -8   7   3    0.60    0.06
  -7   3   8    0.83    0.07
  -3  -8  -7    0.62    0.07
  -7  -3  -8    0.69    0.09
   7  -3   8    0.56    0.06
   7  -3   8    0.48    0.05
   7   3  -8    0.61    0.05
   8  -7   3    0.71    0.04
  -8  -7  -3    0.61    0.08
  -7   3   8    0.66    0.06
   8  -7   3    0.88    0.07
  -3  -8  -7    0.70    0.07
   3  -8   7    0.61    0.06
   7   3  -8    0.59    0.08
  -8   7   3    0.56    0.08
   3   8  -7    0.56    0.08
  -3   8  -7    0.75    0.09
   7  -3  -8    0.61    0.08
  -7   3  -8    0.57    0.08
   7   3   8    0.74    0.07
  -3  -8   7    0.66    0.06
   8   7   3    0.84    0.08
   8   7   3    0.71    0.08
  -8  -7   3    0.59    0.06
  -8  -7   3    0.45    0.07
  -8  -7   3    0.60    0.06
  -8   7  -3    0.68    0.08
  -8   7  -3    0.74    0.06
   3   8   7    0.63    0.08
  -7   3  -8    0.53    0.06
   3  -8  -7    0.48    0.05
   3  -8  -7    0.54    0.07
   3  -8  -7    0.57    0.06
   8  -7  -3    0.63    0.07
   3   8   7    0.69    0.07
  -3   8  -7    0.66    0.06
  -7  -3   8    0.56    0.05
  -7  -3   8    0.56    0.06
   7   3   8    0.71    0.06
   7  -3  -8    0.85    0.08
   7   3   8    0.79    0.06
  -3  -8   7    0.69    0.07
   8  -7  -3    0.59    0.05
  -4   8   0    8.76    0.34
   0   4   8    9.35    0.32
  -8   0   4    8.76    0.32
   0  -4  -8    8.97    0.34
   0  -4  -8    9.26    0.34
   0  -4   8    8.93    0.33
  -8   0  -4    9.37    0.34
   0   4  -8    9.12    0.31
   8   0  -4    8.80    0.35
   8   0  -4    8.68    0.34
  -4   8   0    8.90    0.33
   0   4  -8    9.12    0.32
   8   0   4    9.44    0.33
  -4   8   0    9.18    0.33
  -4  -8   0    9.36    0.31
  -4  -8   0    9.13    0.34
   8   0   4    8.83    0.34
   0   4   8    9.03    0.34
  -4   8   0    8.95    0.32
   4   8   0    9.44    0.32
  -8   0  -4    9.44    0.32
  -4  -8   0    8.94    0.35
   4   8   0    8.86    0.34
   4   8   0    8.82    0.34
   8   0  -4    9.00    0.33
  -8   0  -4    9.17    0.34
   8   0   4    9.32    0.32
  -8   0   4    8.99    0.33
   8  -2   4    0.30    0.04
  -4  -8  -2    0.24    0.05
  -4  -8  -2    0.24    0.05
  -8  -2  -4    0.25    0.05
  -8   2   4    0.25    0.03
   2   4  -8    0.19    0.03
  -4  -8  -2    0.29    0.04
  -2  -4  -8    0.33    0.05
  -2  -4  -8    0.26    0.05
  -2  -4  -8    0.27    0.05
   8  -2   4    0.34    0.03
   8   2  -4    0.26    0.05
   8   2  -4    0.19    0.06
  -2   4   8    0.28    0.05
  -8   2   4    0.15    0.04
   8  -2   4    0.25    0.04
  -4   8   2    0.28    0.05
   2   4  -8    0.30    0.07
   2  -4   8    0.22    0.04
   8   2  -4    0.22    0.05
  -2   4   8    0.31    0.04
  -4   8   2    0.22    0.04
  -8  -2  -4    0.33    0.05
  -4   8   2    0.23    0.03
   4  -8   2    0.24    0.04
   4   8  -2    0.20    0.04
   4   8  -2    0.26    0.05
  -4   8   2    0.26    0.05
  -8  -2  -4    0.25    0.04
   2   4  -8    0.21    0.05
   8  -2  -4    0.18    0.05
   2   4   8    0.17    0.04
   4   8   2    0.17    0.05
   2  -4  -8    0.32    0.06
  -2  -4   8    0.22    0.03
  -2  -4   8    0.26    0.04
  -2   4  -8    0.21    0.06
   8  -2  -4    0.17    0.05
   8   2   4    0.26    0.05
  -8   2  -4    0.34    0.05
  -4  -8   2    0.24    0.04
  -4   8  -2    0.23    0.03
   8  -2  -4    0.27    0.04
  -8  -2   4    0.27    0.04
   8   2   4    0.25    0.04
   4   8   2    0.19    0.05
  -4   8  -2    0.23    0.04
   8   2   4    0.18    0.04
   2   4   8    0.29    0.04
   2  -4  -8    0.22    0.04
  -8  -2   4    0.26    0.04
  -4  -8   2    0.25    0.05
  -4  -8   2    0.28    0.05
  -2   4  -8    0.29    0.04
  -8   2  -4    0.30    0.05
  -4   8  -2    0.23    0.06
   8  -4   4    4.31    0.15
   4   4  -8    4.22    0.21
  -4  -4  -8    4.39    0.18
  -4   8   4    4.02    0.18
   4  -4   8    4.21    0.17
  -4   8   4    4.38    0.19
  -4   8   4    4.04    0.17
  -4  -8  -4    4.33    0.19
   4   4  -8    4.32    0.18
  -4   4   8    4.35    0.18
  -4   4   8    4.17    0.18
   4   8  -4    4.36    0.18
   4   8  -4    4.06    0.19
  -4   8   4    4.40    0.16
  -8   4   4    3.96    0.18
   8   4  -4    4.17    0.19
  -4  -8  -4    4.26    0.18
   4   4  -8    4.24    0.17
  -8  -4  -4    4.33    0.19
   4  -8   4    4.27    0.16
   4  -4   8    4.31    0.17
   8  -4   4    4.33    0.18
   4  -8   4    4.42    0.17
   8   4  -4    4.21    0.19
  -4  -4  -8    4.73    0.20
  -8   4   4    4.43    0.17
  -4  -8  -4    4.49    0.19
  -4  -4  -8    4.63    0.20
  -8  -4  -4    4.30    0.16
  -8  -4   4    4.06    0.17
   8  -4  -4    4.40    0.17
   4   4   8    4.41    0.18
   4  -4  -8    4.25    0.18
   4  -4  -8    4.46    0.18
   4   8   4    4.31    0.19
  -4   8  -4    4.06    0.20
  -4   8  -4    4.49    0.16
   8   4   4    4.55    0.20
  -4   4  -8    3.95    0.20
  -8  -4   4    4.03    0.17
   8   4   4    4.48    0.18
  -4  -8   4    4.17    0.16
  -4  -8   4    4.52    0.19
  -4  -8   4    4.12    0.18
   4  -4  -8    4.10    0.19
   4   4   8    4.50    0.18
   8  -4  -4    4.30    0.19
  -4  -4   8    4.35    0.16
  -4  -4   8    4.17    0.18
   8   4   4    4.48    0.18
  -4   4  -8    4.27    0.17
  -8   4  -4    4.18    0.17
   8  -4  -4    4.18    0.19
   4   8   4    4.42    0.19
  -8   4  -4    4.19    0.20
   4  -8   6    1.18    0.07
   6   4  -8    0.97    0.10
  -4   8   6    1.15    0.08
  -4   8   6    1.27    0.09
  -6  -4  -8    1.16    0.11
  -8  -6  -4    1.24    0.11
  -8  -6  -4    1.14    0.10
   8  -6   4    1.19    0.06
  -4  -8  -6    1.03    0.09
   8   6  -4    1.28    0.10
   4   8  -6    0.93    0.10
  -4  -8  -6    1.24    0.06
  -8   6   4    1.26    0.08
  -8   6   4    1.23    0.08
  -6  -4  -8    1.19    0.08
  -4   8   6    1.14    0.06
   4  -8   6    1.14    0.06
   6  -4   8    1.14    0.07
   6   4  -8    1.20    0.07
  -4  -8  -6    1.25    0.09
   6   4  -8    1.14    0.08
   8   6  -4    1.39    0.10
  -6   4   8    1.07    0.08
   4   8  -6    1.24    0.08
   8  -6   4    1.23    0.08
   6  -4   8    1.31    0.08
  -6   4   8    1.28    0.08
  -4  -8   6    1.16    0.09
   8  -6  -4    1.16    0.09
  -8   6  -4    1.14    0.07
  -6  -4   8    1.15    0.07
   8  -6  -4    1.02    0.10
  -8   6  -4    1.11    0.10
   4   8   6    1.23    0.09
  -6   4  -8    1.11    0.08
   6  -4  -8    1.28    0.10
   6  -4  -8    1.17    0.10
   6  -4  -8    1.18    0.09
  -4  -8   6    1.21    0.09
  -4   8  -6    1.00    0.10
   4   8   6    1.22    0.10
  -4  -8   6    1.17    0.06
   6   4   8    1.18    0.09
   6   4   8    1.24    0.06
  -4   8  -6    1.17    0.08
   8  -6  -4    1.05    0.07
  -6  -4   8    1.13    0.08
  -8  -6   4    1.28    0.09
   6   4   8    1.18    0.08
  -8  -6   4    1.21    0.08
   4  -8  -6    1.14    0.08
   4  -8  -6    1.19    0.09
   8   6   4    1.02    0.09
   8   6   4    1.17    0.09
  -4   8  -6    1.13    0.05
  -6   4  -8    1.27    0.11
  -8  -6   4    1.11    0.08
   5   8  -1    0.82    0.07
  -8  -1  -5    0.91    0.09
  -8  -1  -5    1.04    0.07
  -8   1   5    0.93    0.07
   1  -5   8    0.84    0.07
   8  -1   5    0.84    0.07
   8  -1   5    0.93    0.07
   1   5  -8    0.88    0.06
   8   1  -5    1.02    0.08
  -8   1   5    0.99    0.06
   8   1  -5    0.95    0.08
   5   8  -1    0.80    0.07
  -5   8   1    0.76    0.06
   1   5  -8    0.94    0.09
  -5   8   1    0.89    0.07
  -1   5   8    0.90    0.05
  -1   5   8    1.03    0.07
   8  -1   5    0.96    0.05
  -1  -5  -8    0.91    0.07
  -5   8   1    0.80    0.08
  -5  -8  -1    0.81    0.08
  -5  -8  -1    0.74    0.08
  -5   8   1    0.95    0.06
  -8  -1  -5    0.97    0.07
  -1  -5  -8    0.84    0.08
  -1  -5  -8    0.97    0.08
   8   1  -5    0.91    0.09
  -1   5   8    1.01    0.08
   8   1   5    0.87    0.07
  -1   5  -8    0.69    0.08
  -1  -5   8    1.02    0.08
   1   5   8    0.91    0.08
   1   5   8    0.83    0.07
   8  -1  -5    1.02    0.07
  -5  -8   1    0.88    0.08
  -5   8  -1    0.96    0.06
  -1   5  -8    0.85    0.06
  -8  -1   5    0.88    0.06
  -8   1  -5    0.96    0.08
  -8   1  -5    0.84    0.08
  -8   1  -5    0.87    0.06
  -5   8  -1    0.93    0.06
  -5   8  -1    0.99    0.07
  -5   8  -1    0.74    0.08
  -8  -1   5    0.84    0.06
   8  -1  -5    1.00    0.09
   8  -1  -5    0.87    0.09
   1  -5  -8    0.75    0.07
   5   8   1    0.89    0.08
   5   8   1    0.89    0.08
   1  -5  -8    0.83    0.08
  -5  -8   1    0.92    0.08
   8   1   5    1.01    0.06
  -5  -8   1    0.80    0.07
   8   1   5    1.04    0.07
   8  -3   5    0.51    0.04
   8  -3   5    0.56    0.06
  -5  -8  -3    0.48    0.07
  -3   5   8    0.50    0.06
   3   5  -8    0.57    0.08
   8   3  -5    0.64    0.06
   5   8  -3    0.61    0.06
  -3  -5  -8    0.48    0.07
  -3  -5  -8    0.50    0.06
  -5   8   3    0.62    0.05
   5   8  -3    0.54    0.06
  -8  -3  -5    0.52    0.06
  -5  -8  -3    0.59    0.06
  -5   8   3    0.56    0.05
   3   5  -8    0.55    0.05
  -3   5   8    0.45    0.05
  -3  -5  -8    0.54    0.06
  -5   8   3    0.63    0.06
   3  -5   8    0.63    0.05
   8   3  -5    0.72    0.08
  -8  -3  -5    0.45    0.07
  -8  -3  -5    0.57    0.05
   5  -8   3    0.55    0.05
  -8   3   5    0.64    0.06
  -8   3   5    0.65    0.05
  -5   8   3    0.60    0.07
  -5  -8  -3    0.46    0.06
   3  -5   8    0.61    0.05
   3   5  -8    0.55    0.06
  -5  -8   3    0.45    0.06
  -5   8  -3    0.57    0.06
   3  -5  -8    0.47    0.06
  -3  -5   8    0.58    0.04
  -3  -5   8    0.63    0.06
  -3   5  -8    0.64    0.08
  -3   5  -8    0.70    0.05
  -5   8  -3    0.65    0.05
   8  -3  -5    0.69    0.05
   5   8   3    0.48    0.06
   8   3   5    0.49    0.05
  -8  -3   5    0.72    0.06
  -5  -8   3    0.41    0.06
  -8  -3   5    0.63    0.05
   5   8   3    0.54    0.07
   8  -3  -5    0.62    0.07
   3   5   8    0.44    0.06
   8   3   5    0.48    0.05
   3  -5  -8    0.55    0.05
  -8   3  -5    0.58    0.07
   3  -5  -8    0.53    0.06
  -5   8  -3    0.50    0.07
   3   5   8    0.48    0.06
   8   3   5    0.61    0.07
  -5  -8   3    0.51    0.05
  -8   3  -5    0.49    0.05
   8  -3  -5    0.54    0.07
  -8   5   5    0.05    0.03
  -5  -5  -8    0.05    0.03
  -8  -5  -5    0.01    0.02
  -8   5   5   -0.01    0.03
  -5   5   8   -0.01    0.03
   5   8  -5   -0.02    0.04
  -5  -5  -8   -0.04    0.05
   5  -8   5    0.05    0.02
  -8  -5  -5    0.00    0.04
  -5   8   5    0.01    0.03
   5   5  -8    0.01    0.03
  -5  -5  -8    0.04    0.05
   5  -5   8    0.04    0.03
   5  -5   8    0.01    0.03
   8  -5   5    0.01    0.03
   8  -5   5    0.01    0.02
  -5   5   8    0.03    0.03
   8   5  -5   -0.08    0.04
   5   8  -5    0.04    0.04
  -5  -8  -5   -0.04    0.04
  -5  -8  -5    0.04    0.05
   5   5  -8    0.04    0.05
   5   5  -8   -0.06    0.03
  -5   8   5    0.08    0.04
   5  -8   5   -0.01    0.02
  -5  -8  -5   -0.01    0.04
   8   5  -5   -0.01    0.04
  -8  -5  -5   -0.02    0.05
  -5   8   5    0.02    0.02
  -5   5  -8    0.06    0.05
   5  -8  -5    0.00    0.04
   8  -5  -5    0.06    0.05
  -5   8  -5    0.02    0.02
  -5  -8   5    0.05    0.03
   5   5   8   -0.01    0.02
   5   5   8    0.06    0.04
   8   5   5    0.07    0.05
   5  -8  -5    0.05    0.03
   5   8   5    0.04    0.04
   5   8   5   -0.05    0.04
  -5   8  -5   -0.01    0.03
  -8  -5   5    0.02    0.03
  -5   8  -5   -0.03    0.05
  -5   5  -8    0.06    0.03
   8   5   5    0.06    0.04
  -8   5  -5    0.06    0.05
  -8   5  -5    0.01    0.03
   5  -5  -8    0.08    0.04
   5  -5  -8    0.01    0.04
   5  -5  -8   -0.05    0.03
  -5  -5   8   -0.01    0.02
  -5  -5   8   -0.03    0.03
  -8  -5   5    0.01    0.03
   8  -5  -5    0.05    0.03
   8  -5  -5    0.01    0.04
   5   5   8    0.03    0.04
   8   5   5    0.07    0.04
  -5  -8   5    0.00    0.04
  -5  -8   5    0.00    0.03
   5  -8   7    0.11    0.04
   7  -5   8    0.09    0.04
  -8  -7  -5    0.19    0.07
  -8  -7  -5    0.19    0.06
  -5  -8  -7    0.20    0.03
  -5  -8  -7    0.14    0.05
  -5  -8  -7    0.15    0.05
   8   7  -5    0.10    0.06
   5   8  -7    0.04    0.06
  -7  -5  -8    0.19    0.04
  -7   5   8    0.16    0.04
  -7   5   8    0.22    0.05
   8  -7   5    0.19    0.04
  -7  -5  -8    0.18    0.05
   7   5  -8    0.08    0.03
   7   5  -8    0.03    0.06
   8   7  -5    0.13    0.02
   5  -8   7    0.18    0.04
  -5   8   7    0.18    0.04
  -5   8   7    0.09    0.04
  -8   7   5    0.11    0.04
  -8   7   5    0.14    0.04
   7   5  -8    0.15    0.04
  -7  -5  -8    0.11    0.06
   8  -7   5    0.13    0.03
   8   7  -5    0.13    0.05
   7  -5   8    0.19    0.03
   5   8  -7    0.15    0.04
  -5   8  -7    0.03    0.05
   5   8   7    0.12    0.05
  -8  -7   5    0.08    0.04
   8  -7  -5    0.18    0.03
  -5  -8   7    0.12    0.04
   7  -5  -8    0.15    0.05
   8  -7  -5    0.13    0.05
   8  -7  -5    0.08    0.05
   5  -8  -7    0.16    0.05
   5  -8  -7    0.06    0.04
   5   8   7    0.19    0.05
  -8  -7   5    0.10    0.04
   7   5   8    0.17    0.05
   7   5   8    0.19    0.03
  -7   5  -8    0.18    0.06
  -7   5  -8    0.15    0.04
   7   5   8    0.22    0.05
  -7  -5   8    0.12    0.03
  -8  -7   5    0.13    0.05
   8   7   5    0.14    0.06
   8   7   5    0.19    0.05
  -8   7  -5    0.17    0.06
  -8   7  -5    0.16    0.03
  -5   8  -7    0.17    0.02
  -7  -5   8    0.12    0.04
  -5  -8   7    0.18    0.03
   7  -5  -8    0.16    0.06
   6  -8   0    1.60    0.09
   8   0   6    1.78    0.10
   8   0   6    1.72    0.09
   8   0   6    1.87    0.08
   0   6  -8    1.19    0.11
   0  -6   8    1.47    0.09
   0   6  -8    1.58    0.09
  -8   0  -6    1.78    0.09
  -6  -8   0    1.32    0.11
   8   0  -6    1.33    0.09
   8   0  -6    1.41    0.12
   8   0  -6    1.54    0.11
  -8   0  -6    1.55    0.11
   6   8   0    1.60    0.08
   6   8   0    1.58    0.10
   0   6   8    1.76    0.08
   0   6   8    1.65    0.10
  -8   0   6    1.41    0.09
  -8   0   6    1.43    0.08
  -8   0  -6    1.72    0.10
  -6  -8   0    1.51    0.11
  -6   8   0    1.49    0.08
   0  -6  -8    1.61    0.10
   6   8   0    1.62    0.11
   0  -6  -8    1.55    0.10
  -6   8   0    1.68    0.11
  -6   8   0    1.46    0.08
   0  -6  -8    1.60    0.09
  -8   2   6    3.14    0.14
   2   6  -8    3.02    0.13
   6  -8   2    3.35    0.14
   8  -2   6    2.94    0.14
  -2  -6  -8    2.96    0.15
  -2  -6  -8    3.09    0.15
   8  -2   6    3.15    0.12
  -2   6   8    3.00    0.14
   6   8  -2    3.14    0.14
  -8  -2  -6    3.34    0.14
   6   8  -2    2.83    0.15
  -2  -6  -8    3.16    0.14
  -8  -2  -6    3.14    0.17
  -8  -2  -6    3.06    0.15
  -6   8   2    3.07    0.16
  -8   2   6    3.16    0.13
   6  -8   2    3.21    0.13
   2   6  -8    2.98    0.17
   8   2  -6    3.32    0.16
  -2   6   8    3.09    0.11
  -6  -8  -2    3.14    0.16
   2  -6   8    3.16    0.14
   8   2  -6    3.22    0.14
  -6   8   2    3.07    0.14
  -2   6   8    2.84    0.15
  -6  -8  -2    2.98    0.16
  -6   8   2    3.20    0.14
   8  -2  -6    3.23    0.13
   6  -8  -2    3.23    0.13
   6   8   2    3.25    0.15
   2   6   8    3.31    0.14
   2  -6  -8    3.07    0.15
  -8  -2   6    3.30    0.14
   6   8   2    3.08    0.16
  -2  -6   8    3.11    0.14
  -8  -2   6    3.12    0.14
  -2   6  -8    3.39    0.17
   8   2   6    2.95    0.15
   8   2   6    3.26    0.14
   8   2   6    3.22    0.14
   2  -6  -8    3.09    0.15
   8  -2  -6    3.10    0.16
   8  -2  -6    3.12    0.16
  -6  -8   2    2.82    0.15
  -6   8  -2    3.01    0.16
  -6   8  -2    3.22    0.13
  -2   6  -8    3.15    0.14
  -6  -8   2    2.88    0.14
  -6  -8   2    2.82    0.15
  -8   2  -6    3.09    0.16
   2   6   8    3.07    0.15
   2  -6  -8    3.15    0.13
  -8   2  -6    2.91    0.15
  -8   2  -6    2.89    0.12
  -4   6   8    1.22    0.08
  -4   6   8    1.12    0.09
  -4  -6  -8    1.28    0.07
  -4  -6  -8    1.30    0.10
  -4  -6  -8    1.29    0.10
   8  -4   6    1.19    0.08
   4  -6   8    1.18    0.07
   4   6  -8    1.03    0.07
  -6   8   4    1.17    0.09
   8  -4   6    1.17    0.06
   8   4  -6    1.19    0.08
  -6   8   4    1.24    0.10
  -6   8   4    1.23    0.08
   4   6  -8    1.07    0.08
  -8   4   6    1.04    0.08
  -8   4   6    1.02    0.07
  -8  -4  -6    1.11    0.10
  -8  -4  -6    1.30    0.10
  -6  -8  -4    1.05    0.10
  -6  -8  -4    1.08    0.09
   4   6  -8    1.02    0.10
   4  -6   8    1.20    0.08
   6  -8   4    1.03    0.07
   6   8  -4    1.31    0.09
   8   4  -6    0.94    0.09
  -8  -4  -6    1.31    0.07
   6   8  -4    1.15    0.09
   6  -8   4    1.14    0.08
   4  -6  -8    1.22    0.08
   4  -6  -8    1.16    0.09
  -4  -6   8    1.26    0.09
  -8   4  -6    1.24    0.08
   4   6   8    1.20    0.09
   4   6   8    1.35    0.09
   6  -8  -4    1.24    0.07
   6  -8  -4    1.12    0.08
   4  -6  -8    1.13    0.09
  -6   8  -4    1.21    0.07
  -8   4  -6    1.28    0.10
   6   8   4    1.24    0.10
   6   8   4    1.00    0.09
  -8  -4   6    1.11    0.07
  -8  -4   6    1.19    0.08
  -6  -8   4    1.22    0.08
  -6  -8   4    1.16    0.10
  -6  -8   4    1.15    0.09
  -4   6  -8    1.01    0.10
  -4   6  -8    1.07    0.06
   8   4   6    1.07    0.09
   8   4   6    1.17    0.08
   8   4   6    1.10    0.08
  -4  -6   8    1.17    0.06
   8  -4  -6    1.10    0.07
   8  -4  -6    1.07    0.09
   8  -4  -6    1.02    0.09
  -6   8  -4    1.07    0.10
   8  -6   6   22.83    0.75
   6   8  -6   22.48    0.79
  -6   6   8   22.26    0.77
  -8  -6  -6   22.73    0.80
   6   8  -6   22.08    0.78
  -6   6   8   22.25    0.78
   6   6  -8   22.05    0.77
   6   6  -8   22.74    0.80
  -6   8   6   22.53    0.77
  -6  -6  -8   22.26    0.76
  -6  -6  -8   22.15    0.80
   8   6  -6   22.68    0.75
   6  -8   6   22.26    0.76
  -8   6   6   22.07    0.77
  -6  -8  -6   22.34    0.78
  -6  -8  -6   21.17    0.80
  -6  -8  -6   22.26    0.79
  -8  -6  -6   22.37    0.79
   6  -6   8   22.04    0.76
   8   6  -6   22.65    0.78
   8   6  -6   22.99    0.79
   6   6  -8   22.72    0.76
  -8   6   6   22.05    0.77
   8  -6   6   22.08    0.77
   6  -6   8   22.05    0.77
  -8  -6  -6   22.58    0.75
  -6   8   6   22.74    0.78
   6  -8   6   22.69    0.77
   6  -8  -6   22.33    0.77
   6  -8  -6   21.43    0.79
   6  -8  -6   22.48    0.75
  -6  -8   6   23.01    0.76
   6  -6  -8   22.13    0.77
   6  -6  -8   21.95    0.79
   8  -6  -6   22.41    0.80
  -6  -8   6   22.23    0.78
  -8  -6   6   22.57    0.76
  -6   8  -6   21.65    0.80
  -6   8  -6   22.62    0.75
  -8   6  -6   22.62    0.76
   6   6   8   22.13    0.78
   6   6   8   21.69    0.78
  -6   6  -8   22.03    0.80
  -6   6  -8   22.87    0.76
   6   8   6   22.40    0.79
   6   8   6   21.75    0.79
   8  -6  -6   22.12    0.75
   8  -6  -6   22.38    0.78
   8   6   6   21.56    0.78
  -6  -6   8   22.30    0.78
  -6  -8   6   22.56    0.78
  -8  -6   6   21.61    0.77
  -8   6  -6   22.28    0.80
  -6  -6   8   23.22    0.76
   8   6   6   21.47    0.79
   8   6   6   22.47    0.77
   6  -6  -8   21.79    0.78
   7  -8   1    0.29    0.03
  -1   7   8    0.21    0.05
  -8   1   7    0.25    0.04
   8  -1   7    0.22    0.05
   8  -1   7    0.24    0.04
   8  -1   7    0.33    0.04
   8   1  -7    0.37    0.04
   8   1  -7    0.28    0.07
  -7   8   1    0.21    0.04
  -7   8   1    0.25    0.04
   7   8  -1    0.35    0.04
   1   7  -8    0.21    0.06
  -1   7   8    0.21    0.03
  -1   7   8    0.30    0.05
  -1  -7  -8    0.22    0.05
  -8  -1  -7    0.19    0.05
   1   7  -8    0.22    0.04
   7  -8   1    0.24    0.04
  -7  -8  -1    0.20    0.06
   1  -7   8    0.33    0.05
  -7   8   1    0.25    0.06
  -8  -1  -7    0.22    0.06
  -8  -1  -7    0.19    0.04
  -1  -7  -8    0.26    0.05
  -1  -7  -8    0.17    0.05
  -8   1   7    0.30    0.04
  -7  -8  -1    0.22    0.06
   7   8  -1    0.20    0.05
  -8   1  -7    0.25    0.04
   8  -1  -7    0.23    0.06
  -1  -7   8    0.25    0.05
  -7   8  -1    0.23    0.06
  -7  -8   1    0.20    0.05
   1  -7  -8    0.32    0.03
   1  -7  -8    0.22    0.05
  -1   7  -8    0.38    0.07
   1   7   8    0.24    0.04
   1   7   8    0.19    0.05
   7  -8  -1    0.25    0.04
   1  -7  -8    0.26    0.05
   8   1   7    0.26    0.04
   8  -1  -7    0.27    0.06
  -1   7  -8    0.20    0.04
   7   8   1    0.23    0.06
   7   8   1    0.19    0.05
   8  -1  -7    0.32    0.04
  -8  -1   7    0.32    0.04
  -7  -8   1    0.18    0.05
  -8   1  -7    0.21    0.05
  -8   1  -7    0.22    0.05
  -7   8  -1    0.31    0.04
  -7  -8   1    0.20    0.05
   8   1   7    0.13    0.05
   8   1   7    0.24    0.04
  -8  -1   7    0.30    0.04
  -3   7   8    0.48    0.04
  -8   3   7    0.76    0.06
  -3   7   8    0.41    0.06
   7  -8   3    0.65    0.06
   7  -8   3    0.67    0.05
   7   8  -3    0.58    0.07
   7   8  -3    0.49    0.06
  -8  -3  -7    0.72    0.06
  -7   8   3    0.67    0.08
  -7   8   3    0.71    0.06
  -7   8   3    0.81    0.07
  -3  -7  -8    0.80    0.06
   8  -3   7    0.47    0.06
   8  -3   7    0.59    0.05
   8   3  -7    0.64    0.06
   8   3  -7    0.73    0.09
   8   3  -7    0.71    0.06
  -7  -8  -3    0.74    0.08
  -8  -3  -7    0.59    0.08
  -8  -3  -7    0.62    0.07
   3  -7   8    0.72    0.06
   3   7  -8    0.55    0.06
   3   7  -8    0.49    0.08
  -3   7   8    0.52    0.06
  -8   3   7    0.67    0.06
  -3  -7  -8    0.81    0.08
  -3  -7  -8    0.69    0.07
  -7  -8  -3    0.72    0.09
   8   3   7    0.73    0.08
  -7  -8   3    0.54    0.06
  -7  -8   3    0.56    0.07
  -7  -8   3    0.48    0.06
  -7   8  -3    0.57    0.08
   7   8   3    0.66    0.08
   8   3   7    0.71    0.06
   3  -7  -8    0.45    0.05
   3  -7  -8    0.58    0.07
   3  -7  -8    0.47    0.06
  -8  -3   7    0.81    0.06
  -8  -3   7    0.68    0.06
  -8   3  -7    0.54    0.07
   3   7   8    0.70    0.07
   3   7   8    0.70    0.07
   7  -8  -3    0.68    0.05
  -3   7  -8    0.78    0.03
  -8   3  -7    0.50    0.06
   8   3   7    0.65    0.06
   7   8   3    0.71    0.07
   8  -3  -7    0.71    0.05
   8  -3  -7    0.70    0.08
   8  -3  -7    0.58    0.08
  -7   8  -3    0.67    0.05
   7  -8  -3    0.71    0.07
  -3  -7   8    0.65    0.03
  -3  -7   8    0.53    0.06
  -3   7  -8    0.77    0.06
  -3   7  -8    0.74    0.09
  -8  -5  -7    0.21    0.03
  -8  -5  -7    0.18    0.07
  -8  -5  -7    0.11    0.05
  -7   8   5    0.13    0.04
  -7   8   5    0.15    0.05
  -5  -7  -8    0.21    0.03
  -5  -7  -8    0.20    0.06
  -5  -7  -8    0.27    0.06
  -8   5   7    0.11    0.04
  -7  -8  -5    0.25    0.07
  -7  -8  -5    0.20    0.05
   7   8  -5    0.14    0.04
  -5   7   8    0.13    0.04
  -5   7   8    0.19    0.05
   8   5  -7    0.10    0.04
   8   5  -7    0.17    0.06
   8   5  -7    0.10    0.03
   5  -7   8    0.16    0.04
   5  -7   8    0.16    0.04
   5   7  -8    0.12    0.04
   5   7  -8    0.18    0.06
   5   7  -8    0.12    0.04
   7   8  -5    0.07    0.05
   8  -5   7    0.10    0.04
   8  -5   7    0.15    0.03
  -8   5   7    0.13    0.04
   7  -8   5    0.14    0.03
   7  -8   5    0.12    0.04
   7  -8  -5    0.20    0.05
  -5   7  -8    0.20    0.03
   5   7   8    0.20    0.06
   7   8   5    0.23    0.06
   7   8   5    0.22    0.05
   8  -5  -7    0.11    0.03
   8  -5  -7    0.12    0.05
   8  -5  -7    0.06    0.05
   5   7   8    0.11    0.05
   7  -8  -5    0.18    0.03
   5  -7  -8    0.13    0.04
   5  -7  -8    0.12    0.05
   5  -7  -8    0.10    0.04
   8   5   7    0.14    0.06
   8   5   7    0.16    0.04
   8   5   7    0.19    0.05
  -7   8  -5    0.14    0.03
  -8  -5   7    0.19    0.04
  -8  -5   7    0.17    0.04
  -8   5  -7    0.15    0.06
  -8   5  -7    0.12    0.04
   7  -8  -5    0.13    0.04
  -5  -7   8    0.13    0.02
  -5  -7   8    0.16    0.05
  -5   7  -8    0.10    0.06
  -7  -8   5    0.13    0.03
  -7  -8   5    0.15    0.05
  -7  -8   5    0.11    0.04
  -7   8  -5    0.08    0.06
  -8  -7  -7    0.01    0.02
  -8  -7  -7    0.07    0.06
  -8  -7  -7   -0.06    0.04
   7  -7   8    0.04    0.03
   7   7  -8    0.04    0.04
   7   7  -8   -0.03    0.06
   7   7  -8    0.02    0.03
  -8   7   7   -0.01    0.04
  -8   7   7    0.01    0.04
  -7  -8  -7    0.05    0.06
  -7  -8  -7    0.08    0.05
   8   7  -7    0.00    0.03
   7  -8   7   -0.05    0.03
  -7  -7  -8    0.02    0.02
  -7  -7  -8   -0.04    0.05
  -7  -7  -8   -0.01    0.04
   7  -7   8    0.03    0.04
   8  -7   7   -0.04    0.04
   8  -7   7    0.01    0.03
   8   7  -7    0.00    0.04
  -7   7   8    0.04    0.04
  -7   7   8    0.06    0.04
   7   8  -7    0.02    0.03
   7   8  -7    0.03    0.04
  -7   8   7    0.00    0.04
  -7   8   7   -0.01    0.04
   7  -8   7    0.03    0.04
   7   8  -7   -0.01    0.05
   8   7  -7   -0.03    0.06
   7  -8  -7   -0.01    0.02
  -7   8  -7    0.04    0.06
   7  -8  -7    0.05    0.04
   7  -7  -8    0.00    0.04
   7  -7  -8    0.04    0.05
  -7  -7   8   -0.02    0.02
  -8  -7   7    0.03    0.03
  -8  -7   7    0.01    0.04
  -8   7  -7    0.02    0.06
  -8   7  -7    0.04    0.03
   7   7   8    0.00    0.05
   7   7   8    0.06    0.04
  -7   8  -7   -0.01    0.02
   7  -7  -8    0.03    0.02
  -7  -8   7    0.03    0.04
   7   8   7   -0.07    0.05
   7   8   7    0.03    0.04
   8  -7  -7   -0.01    0.02
   8  -7  -7    0.05    0.05
   8  -7  -7    0.01    0.05
  -7  -7   8    0.04    0.04
  -7   7  -8    0.01    0.06
  -7   7  -8    0.03    0.03
   7  -8  -7    0.01    0.05
  -7  -8   7    0.06    0.03
   8   7   7    0.01    0.05
   8   7   7    0.01    0.04
  -8  -8   0  705.16   24.27
  -8  -8   0  726.44   24.28
  -8  -8   0  738.23   24.25
  -8   0  -8  710.15   24.26
  -8   0  -8  730.54   24.28
  -8   0  -8  731.13   24.17
  -8   0   8  706.11   24.21
  -8   0   8  751.39   24.22
  -8   8   0  732.83   24.29
  -8   8   0  723.02   24.23
  -8   8   0  775.73   24.17
   0  -8  -8  759.38   24.23
   0  -8  -8  737.24   24.28
   0  -8  -8  699.05   24.26
   0  -8   8  760.31   24.26
   0   8  -8  696.23   24.22
   0   8  -8  716.89   24.25
   0   8   8  757.89   24.17
   0   8   8  730.80   24.25
   8  -8   0  728.10   24.23
   8   0  -8  744.84   24.17
   8   0  -8  765.67   24.32
   8   0   8  741.26   24.26
   8   0   8  718.89   24.20
   8   0   8  721.87   24.19
   8   8   0  690.49   24.28
   8   8   0  760.68   24.14
  -8  -8  -2   -0.02    0.05
  -8  -8  -2   -0.02    0.05
   8  -2   8    0.07    0.04
   8  -2   8    0.03    0.03
   8   2  -8    0.02    0.03
  -8  -2  -8    0.04    0.04
  -8  -2  -8    0.02    0.05
  -8  -2  -8   -0.01    0.03
   8  -8   2    0.01    0.02
   2   8  -8    0.02    0.03
   8   8  -2    0.03    0.05
   8   8  -2   -0.10    0.03
  -2  -8  -8   -0.07    0.03
  -8   2   8   -0.02    0.03
  -8   2   8   -0.02    0.03
   8   2  -8    0.01    0.05
   8   2  -8    0.04    0.03
  -8   8   2   -0.01    0.05
  -8   8   2    0.03    0.03
  -8   8   2   -0.01    0.03
  -2   8   8   -0.01    0.04
  -2  -8  -8   -0.04    0.04
  -2  -8  -8   -0.04    0.04
   2   8  -8    0.04    0.05
   2  -8   8   -0.04    0.03
   8  -8   2   -0.02    0.03
  -2   8   8   -0.03    0.02
  -2   8   8    0.01    0.04
  -8   2  -8    0.04    0.02
   2  -8  -8    0.01    0.03
   2  -8  -8    0.04    0.04
  -2   8  -8   -0.05    0.05
  -2   8  -8    0.02    0.03
  -8  -2   8   -0.03    0.03
  -2  -8   8   -0.03    0.03
   2   8   8    0.06    0.04
   2   8   8   -0.03    0.04
   8  -8  -2   -0.02    0.03
   8  -8  -2    0.03    0.04
   2  -8  -8    0.03    0.04
  -8  -2   8   -0.01    0.03
   8  -2  -8    0.02    0.03
   8  -2  -8    0.00    0.05
   8  -2  -8   -0.05    0.05
  -8  -8   2    0.03    0.04
  -8  -8   2    0.02    0.05
  -8  -8   2   -0.02    0.04
  -8   8  -2   -0.02    0.05
  -8   8  -2    0.03    0.03
   8   2   8    0.00    0.04
   8   2   8    0.02    0.03
   8   2   8    0.00    0.03
  -8   2  -8   -0.08    0.04
  -8   2  -8   -0.01    0.04
   8   8   2    0.02    0.05
   8   8   2   -0.07    0.03
  -8  -8  -4   14.92    0.56
  -8  -8  -4   15.04    0.55
   4   8  -8   14.89    0.53
   8  -4   8   14.75    0.53
   8  -4   8   14.85    0.51
  -8  -4  -8   15.25    0.52
  -8  -4  -8   14.56    0.56
  -8  -4  -8   15.54    0.54
   8  -8   4   14.98    0.53
   8  -8   4   15.09    0.51
  -4   8   8   15.22    0.54
   8   8  -4   14.13    0.54
  -8   4   8   15.15    0.53
  -8   4   8   14.89    0.53
  -4   8   8   15.26    0.50
   8   4  -8   14.27    0.52
  -8   8   4   14.36    0.55
  -8   8   4   14.61    0.53
  -8   8   4   15.35    0.53
  -4  -8  -8   15.13    0.51
  -4  -8  -8   15.05    0.54
  -4  -8  -8   14.58    0.55
   8   8  -4   15.13    0.54
  -4   8   8   14.80    0.54
   8   4  -8   14.61    0.56
   8   4  -8   15.18    0.52
   4  -8   8   14.89    0.52
   4   8  -8   14.55    0.56
  -8   4  -8   15.35    0.56
  -4   8  -8   15.17    0.50
   4  -8  -8   15.10    0.52
   4  -8  -8   15.21    0.55
   4  -8  -8   14.60    0.54
  -4  -8   8   14.46    0.54
  -8  -8   4   14.73    0.53
  -8   8  -4   14.34    0.56
   4   8   8   14.81    0.54
   4   8   8   14.82    0.55
   8  -8  -4   14.43    0.52
   8  -8  -4   14.63    0.54
  -8  -4   8   15.33    0.52
  -8  -4   8   14.85    0.53
   8  -4  -8   15.01    0.51
   8  -4  -8   14.63    0.54
   8  -4  -8   15.06    0.56
  -8  -8   4   14.71    0.55
  -8  -8   4   14.61    0.54
  -8   8  -4   15.24    0.52
  -4   8  -8   14.98    0.53
  -4   8  -8   14.46    0.56
   8   4   8   14.62    0.54
   8   4   8   15.19    0.52
   8   4   8   14.73    0.53
  -8   4  -8   14.61    0.53
  -4  -8   8   15.34    0.50
   8   8   4   14.43    0.55
   8   8   4   15.10    0.54
  -8  -8  -6   -0.01    0.06
  -8  -8  -6    0.05    0.05
   6   8  -8    0.05    0.04
   6   8  -8    0.05    0.06
   6   8  -8   -0.08    0.03
  -8  -6  -8    0.01    0.03
  -8  -6  -8    0.05    0.06
  -8  -6  -8   -0.04    0.04
   8   6  -8   -0.04    0.06
   8   6  -8   -0.03    0.03
   8  -8   6    0.02    0.04
   8  -8   6    0.00    0.03
  -8   6   8   -0.03    0.04
  -8   6   8    0.03    0.04
   8   8  -6    0.02    0.06
   8  -6   8   -0.01    0.04
  -8   8   6   -0.05    0.03
  -8   8   6    0.00    0.04
  -6  -8  -8   -0.01    0.02
  -6  -8  -8    0.05    0.05
  -6  -8  -8   -0.03    0.05
  -6  -8  -8   -0.04    0.04
   6  -8   8   -0.05    0.03
   8   8  -6    0.01    0.04
   8  -6   8    0.00    0.03
   8   6  -8   -0.02    0.03
  -6   8   8    0.04    0.04
  -6   8   8   -0.05    0.04
   6  -8   8    0.02    0.04
   6  -8  -8   -0.01    0.04
   6  -8  -8    0.02    0.05
   6  -8  -8   -0.01    0.04
   6  -8  -8    0.02    0.02
  -6  -8   8   -0.04    0.02
  -8  -8   6    0.04    0.03
  -8  -8   6    0.01    0.04
  -8  -8   6    0.01    0.04
   6   8   8    0.09    0.05
   6   8   8    0.02    0.05
   8  -8  -6   -0.02    0.02
   8  -8  -6    0.00    0.04
   8  -8  -6    0.06    0.05
  -8   6  -8    0.01    0.05
  -8   6  -8   -0.04    0.03
   8  -6  -8    0.03    0.03
   8  -6  -8   -0.03    0.05
   8  -6  -8    0.06    0.05
  -8   8  -6   -0.01    0.03
  -6   8  -8    0.06    0.06
  -6   8  -8    0.02    0.02
  -8  -6   8   -0.05    0.02
  -8  -6   8    0.00    0.04
   8   6   8    0.11    0.06
   8   6   8   -0.01    0.03
   8   6   8   -0.02    0.04
  -6  -8   8    0.03    0.04
  -8   8  -6   -0.03    0.05
   8   8   6   -0.02    0.05
   8   8   6   -0.01    0.04
  -8  -8  -8  311.96   10.40
  -8  -8  -8  313.41   10.38
   8   8  -8  327.50   10.34
   8   8  -8  314.88   10.39
   8  -8   8  313.85   10.37
   8   8  -8  312.75   10.39
  -8   8   8  312.53   10.43
  -8   8   8  307.15   10.36
   8  -8   8  303.03   10.39
   8  -8  -8  323.48   10.37
   8  -8  -8  321.71   10.39
   8  -8  -8  313.65   10.34
  -8   8  -8  315.07   10.40
  -8   8  -8  311.15   10.37
  -8  -8   8  318.34   10.37
  -8  -8   8  311.42   10.36
   8   8   8  309.82   10.38
   8   8   8  308.10   10.41
  -1   0  -9   -0.01    0.04
  -1   0  -9    0.03    0.03
  -1   0   9    0.01    0.02
  -1   0   9    0.01    0.02
  -1   0   9   -0.04    0.03
   0  -9  -1    0.01    0.02
   0  -9   1    0.01    0.02
   0  -9   1    0.04    0.04
   0   9  -1    0.01    0.03
   0   9  -1    0.01    0.03
   0   9  -1    0.05    0.04
   0   9   1   -0.02    0.03
   0   9   1   -0.04    0.03
   0   9   1   -0.02    0.04
   1   0  -9    0.06    0.05
   1   0  -9    0.06    0.04
   1   0   9   -0.01    0.02
   1   0   9    0.03    0.03
   9  -1   0   -0.04    0.03
   9  -1   0    0.04    0.04
   9   1   0    0.02    0.04
   9   1   0   -0.04    0.03
  -1   0  -9    0.03    0.05
  -9  -1   0    0.04    0.04
  -9  -1   0    0.03    0.03
  -9  -1   0    0.00    0.02
  -9   1   0    0.04    0.04
  -9   1   0   -0.01    0.03
   9   3   0   -0.04    0.04
  -3   0  -9   -0.05    0.05
  -9  -3   0    0.04    0.04
  -9  -3   0    0.02    0.04
  -9  -3   0   -0.02    0.02
  -9   3   0   -0.01    0.04
  -9   3   0   -0.02    0.03
  -3   0  -9    0.00    0.04
   0  -9   3    0.03    0.03
   0  -9   3    0.03    0.03
   0   9  -3   -0.02    0.03
   0   9  -3    0.02    0.04
   0   9   3    0.00    0.03
   0   9   3   -0.02    0.03
   0   9   3    0.04    0.04
   3   0  -9    0.01    0.02
   3   0  -9    0.02    0.05
   3   0  -9    0.05    0.04
   3   0   9   -0.01    0.02
   3   0   9   -0.01    0.03
   9  -3   0    0.03    0.03
   9  -3   0    0.02    0.04
   9   3   0    0.01    0.05
   9   3   0    0.02    0.03
  -3   0  -9    0.01    0.04
  -3   0   9   -0.01    0.02
  -3   0   9    0.03    0.03
   0  -9  -3    0.01    0.02
   0  -9  -3    0.02    0.03
   0  -9   3   -0.01    0.02
  -9  -5   0    0.01    0.03
  -9   5   0   -0.01    0.05
  -9   5   0    0.01    0.03
  -5   0  -9    0.01    0.04
   5   0  -9    0.05    0.06
  -5   0   9    0.02    0.03
  -5   0   9   -0.03    0.03
   0  -9  -5    0.01    0.03
   0  -9  -5    0.05    0.03
   0  -9  -5    0.04    0.03
   0  -9   5    0.01    0.03
   0  -9   5   -0.01    0.03
   0   9  -5    0.05    0.03
   0   9  -5   -0.03    0.05
   0   9   5   -0.01    0.03
   0   9   5    0.02    0.04
   5   0  -9    0.01    0.01
  -9  -5   0    0.02    0.04
   5   0  -9    0.02    0.03
   5   0   9    0.01    0.03
   5   0   9    0.00    0.03
   9  -5   0   -0.01    0.03
   9  -5   0    0.00    0.04
   9   5   0   -0.01    0.05
   9   5   0    0.03    0.03
  -9  -5   0    0.07    0.04
  -5   0  -9   -0.01    0.05
   7   0  -9    0.00    0.02
   9  -7   0   -0.02    0.04
   0   9   7    0.00    0.04
   7   0   9   -0.02    0.03
   9  -7   0   -0.06    0.03
   0  -9  -7    0.02    0.04
   0  -9   7    0.00    0.03
   0  -9   7    0.03    0.04
   0   9  -7   -0.02    0.03
   0  -9  -7    0.01    0.02
   0   9   7   -0.01    0.03
   7   0  -9    0.00    0.04
   7   0   9    0.03    0.03
   0  -9  -7   -0.03    0.03
   0  -9  -7    0.01    0.03
   9   7   0    0.04    0.05
   9   7   0    0.02    0.03
  -9  -7   0   -0.05    0.04
  -9   7   0   -0.01    0.05
   0   9  -7   -0.06    0.05
  -9   7   0    0.03    0.02
  -9  -7   0   -0.04    0.04
  -9  -7   0   -0.05    0.05
  -7   0   9    0.01    0.04
  -9   7   0    0.00    0.03
  -7   0  -9    0.01    0.03
   7   0  -9   -0.02    0.06
  -7   0  -9    0.07    0.04
  -7   0  -9   -0.04    0.05
  -7   0   9   -0.01    0.03
   9   0   1   -0.01    0.04
   9   0  -1    0.02    0.04
   9   0  -1    0.03    0.04
   0   1  -9    0.00    0.04
   0   1  -9   -0.09    0.04
   1   9   0    0.02    0.03
  -1  -9   0    0.05    0.04
   9   0  -1    0.05    0.04
  -9   0  -1    0.02    0.03
  -1  -9   0   -0.03    0.03
   1   9   0    0.00    0.03
  -1   9   0   -0.01    0.02
  -1   9   0    0.00    0.03
  -9   0  -1   -0.01    0.03
  -9   0  -1    0.00    0.02
  -9   0   1    0.02    0.03
  -9   0   1    0.03    0.02
   1   9   0   -0.02    0.03
  -1   9   0    0.00    0.03
  -1   9   0   -0.01    0.03
   0  -1   9    0.05    0.02
   0  -1   9   -0.03    0.03
   0  -1  -9    0.04    0.05
   0  -1  -9    0.02    0.04
   0  -1  -9    0.00    0.03
   0   1  -9    0.01    0.02
   0   1   9    0.01    0.02
   0   1   9    0.03    0.03
   9   0   1    0.04    0.04
  -9  -2  -1    1.82    0.08
  -1  -9  -2    1.91    0.08
   9   2  -1    1.65    0.11
   2  -1   9    1.84    0.08
  -2   1   9    1.41    0.09
   2   1  -9    1.75    0.07
   9  -2   1    1.51    0.09
  -9   2   1    1.68    0.11
  -9   2   1    1.52    0.09
   9   2  -1    1.59    0.10
  -1  -9  -2    1.81    0.09
  -2   1   9    1.55    0.07
  -2   1   9    1.47    0.08
   1   9  -2    1.60    0.09
   1   9  -2    1.53    0.10
  -1   9   2    1.59    0.09
   2   1  -9    1.56    0.12
   9  -2   1    1.54    0.10
   9   2  -1    1.73    0.11
  -2  -1  -9    1.60    0.11
  -2  -1  -9    1.67    0.12
  -2  -1  -9    1.71    0.10
   2  -1   9    1.85    0.09
  -1   9   2    1.58    0.09
  -1   9   2    1.80    0.09
  -1   9   2    1.75    0.10
   1  -9   2    1.59    0.10
  -9  -2  -1    1.68    0.09
  -9  -2  -1    1.73    0.10
   1  -9   2    1.72    0.10
   2   1  -9    1.46    0.10
  -9   2  -1    1.59    0.09
   2   1   9    1.82    0.09
   9  -2  -1    1.64    0.09
   9  -2  -1    1.80    0.11
  -1  -9   2    1.60    0.08
  -1  -9   2    1.62    0.10
  -1  -9   2    1.41    0.10
  -1   9  -2    1.58    0.09
  -9   2  -1    1.52    0.10
  -2  -1   9    1.59    0.08
  -2  -1   9    1.59    0.09
  -2   1  -9    1.87    0.12
  -2   1  -9    1.69    0.12
   9   2   1    1.72    0.11
  -9  -2   1    1.64    0.10
  -9  -2   1    1.60    0.08
   1   9   2    1.63    0.09
   1   9   2    1.84    0.08
  -2   1  -9    1.93    0.10
   2   1   9    1.80    0.08
   9   2   1    1.47    0.10
   2  -1  -9    1.47    0.12
  -1   9  -2    1.70    0.08
  -1   9  -2    1.53    0.10
   2  -1  -9    1.56    0.10
   9  -4   1   -0.04    0.03
   9  -4   1    0.00    0.03
   1  -9   4    0.01    0.03
   1  -9   4    0.00    0.03
   1  -9   4    0.00    0.02
   4  -1   9    0.02    0.03
  -4  -1  -9    0.00    0.04
  -9   4   1    0.01    0.03
  -1  -9  -4   -0.02    0.03
  -9  -4  -1   -0.02    0.04
  -1   9   4    0.01    0.03
   9   4  -1    0.00    0.04
  -1   9   4    0.02    0.04
   9   4  -1   -0.01    0.05
   9   4  -1    0.00    0.03
  -4  -1  -9    0.00    0.04
  -4   1   9    0.01    0.03
  -1  -9  -4    0.04    0.03
  -9  -4  -1   -0.01    0.04
  -1   9   4   -0.03    0.03
  -1  -9  -4    0.04    0.03
   4   1  -9   -0.02    0.03
  -4   1   9   -0.02    0.03
   4  -1   9    0.00    0.03
   1   9  -4    0.01    0.04
  -9   4   1    0.04    0.04
   4   1  -9   -0.01    0.05
   4   1  -9    0.00    0.02
   1   9  -4    0.01    0.03
  -4  -1   9    0.04    0.03
  -4  -1   9   -0.01    0.03
  -9  -4   1    0.03    0.04
  -4   1  -9    0.02    0.04
  -9  -4   1    0.02    0.03
  -1  -9   4    0.03    0.03
  -1   9  -4    0.00    0.03
   1  -9  -4    0.02    0.03
   4   1   9    0.04    0.03
   9  -4  -1    0.01    0.04
  -4   1  -9   -0.02    0.04
   4  -1  -9   -0.04    0.05
   9  -4  -1    0.04    0.03
  -9   4  -1    0.01    0.03
   9   4   1   -0.02    0.03
  -9  -4   1   -0.05    0.03
  -1  -9   4    0.07    0.03
  -1  -9   4   -0.04    0.03
   4   1   9    0.03    0.03
   1  -9  -4    0.01    0.03
   1   9   4    0.00    0.04
  -1   9  -4    0.06    0.05
   9   4   1    0.03    0.05
   9   4   1    0.07    0.04
   1   9   4   -0.02    0.03
   4  -1  -9    0.01    0.03
  -9   4  -1    0.00    0.04
  -9   6   1    8.72    0.35
  -9   6   1    9.26    0.31
   9   6  -1    9.06    0.33
   6   1  -9    8.56    0.36
   6   1  -9    9.09    0.31
  -1   9   6    8.66    0.35
   6  -1   9    9.08    0.33
   6  -1   9    8.96    0.32
  -6  -1  -9    8.69    0.34
   6   1  -9    8.85    0.33
   1  -9   6    9.07    0.33
   9  -6   1    8.32    0.33
  -6   1   9    8.71    0.33
  -6   1   9    8.64    0.33
  -1  -9  -6    9.50    0.32
  -1  -9  -6    9.15    0.33
  -1  -9  -6    9.37    0.34
   1   9  -6    8.55    0.36
   1   9  -6    8.89    0.33
   9  -6   1    8.75    0.34
  -9   6   1    9.49    0.33
  -9  -6  -1    8.91    0.35
   1  -9   6    9.04    0.32
  -1   9   6    9.21    0.34
   9   6  -1    8.93    0.35
  -9  -6  -1    9.10    0.35
  -6  -1  -9    9.50    0.36
  -1   9   6    9.03    0.32
  -6   1  -9    8.54    0.35
   1   9   6    9.33    0.33
  -6  -1   9    9.24    0.34
  -1  -9   6    8.30    0.33
  -6  -1   9    8.78    0.32
   6  -1  -9    8.62    0.30
   1  -9  -6    9.05    0.33
  -6   1  -9    8.80    0.35
   6   1   9    9.16    0.33
   9   6   1    8.63    0.35
   9   6   1    9.33    0.32
   9   6   1    9.16    0.34
   9  -6  -1    8.93    0.33
  -1   9  -6    9.47    0.34
  -1   9  -6    8.31    0.36
  -1  -9   6    8.39    0.33
   6   1   9    9.20    0.33
   6  -1  -9    8.71    0.36
  -9  -6   1    8.81    0.34
   9  -6  -1    9.30    0.34
  -9   6  -1    8.42    0.35
  -9   6  -1    8.93    0.33
   6  -1  -9    8.40    0.33
  -9  -6   1    9.22    0.35
  -9  -6   1    8.94    0.33
   1  -9  -6    9.08    0.33
   1   9   6    9.24    0.35
   9  -8   1    0.01    0.02
  -9  -8  -1    0.04    0.05
   1   9  -8    0.01    0.06
   8   1  -9   -0.02    0.06
   1  -9   8    0.01    0.04
   1   9  -8    0.00    0.03
  -1  -9  -8    0.01    0.04
  -9  -8  -1    0.04    0.05
  -8  -1  -9    0.02    0.03
  -1  -9  -8   -0.04    0.03
   9   8  -1    0.00    0.05
  -1   9   8   -0.06    0.04
  -1   9   8    0.04    0.05
  -9   8   1    0.00    0.05
  -9   8   1    0.05    0.03
  -9   8   1    0.04    0.03
  -8  -1  -9    0.02    0.04
  -8  -1  -9   -0.01    0.05
   9  -8   1   -0.06    0.03
   8  -1   9    0.00    0.03
   8   1  -9    0.03    0.02
   9   8  -1   -0.02    0.04
  -8   1   9   -0.02    0.03
  -1   9   8    0.01    0.02
  -8   1   9   -0.02    0.03
  -1  -9  -8    0.02    0.04
   8   1  -9    0.02    0.04
   8  -1   9   -0.06    0.04
  -9  -8   1    0.01    0.05
  -9  -8   1    0.06    0.05
   8  -1  -9    0.04    0.04
  -9   8  -1   -0.04    0.03
   8  -1  -9    0.05    0.06
   9   8   1    0.00    0.03
  -8   1  -9    0.00    0.04
   1  -9  -8    0.01    0.02
  -1  -9   8   -0.03    0.04
  -1   9  -8    0.02    0.03
   8   1   9    0.07    0.03
   9   8   1    0.04    0.05
   9  -8  -1   -0.02    0.04
   1   9   8    0.05    0.03
  -8  -1   9    0.01    0.03
  -8  -1   9    0.01    0.04
  -1   9  -8   -0.07    0.05
  -9   8  -1   -0.06    0.05
   8   1   9    0.04    0.03
   8   1   9    0.08    0.04
   1   9   8   -0.02    0.04
  -8   1  -9   -0.01    0.05
  -8   1  -9   -0.02    0.03
   9   8   1    0.04    0.04
  -9  -8   1    0.05    0.04
   1  -9  -8    0.08    0.04
   1  -9  -8    0.03    0.04
   8  -1  -9    0.04    0.02
   9  -8  -1    0.03    0.03
  -1  -2  -9    1.80    0.11
   1  -2   9    1.47    0.08
   2   9  -1    1.74    0.09
  -1   2   9    1.81    0.09
  -2   9   1    1.52    0.08
  -2  -9  -1    1.77    0.11
   9   1  -2    1.30    0.10
   9  -1   2    1.76    0.10
   2   9  -1    1.55    0.09
  -1  -2  -9    1.78    0.09
  -2  -9  -1    1.69    0.08
   9   1  -2    1.68    0.11
  -9  -1  -2    1.72    0.09
  -2   9   1    1.54    0.09
  -2   9   1    1.64    0.10
  -9  -1  -2    1.83    0.09
  -2  -9  -1    1.61    0.09
   9  -1   2    1.63    0.10
   9   1  -2    1.50    0.10
   1  -2   9    1.54    0.09
   1   2  -9    1.77    0.08
   1   2  -9    1.61    0.12
   1   2  -9    1.47    0.11
  -9   1   2    1.69    0.07
  -9  -1  -2    1.66    0.10
  -2   9   1    1.57    0.10
  -1  -2  -9    1.59    0.11
  -1   2   9    1.79    0.10
   2   9  -1    1.67    0.10
  -1   2   9    1.72    0.07
  -9   1   2    1.51    0.09
  -1   2  -9    1.51    0.12
  -1  -2   9    1.58    0.09
   2   9   1    1.51    0.09
   2   9   1    1.73    0.08
   9   1   2    1.89    0.11
  -2   9  -1    1.67    0.10
   9  -1  -2    1.60    0.11
  -1  -2   9    1.64    0.08
  -9  -1   2    1.61    0.08
  -9   1  -2    1.69    0.10
   9   1   2    1.71    0.10
  -1   2  -9    1.55    0.12
  -2  -9   1    1.67    0.07
   9  -1  -2    1.70    0.10
  -2   9  -1    1.62    0.08
   9   1   2    1.65    0.07
  -2  -9   1    1.76    0.09
  -2  -9   1    1.54    0.11
  -2   9  -1    1.66    0.09
   1   2   9    1.63    0.08
   1   2   9    1.61    0.09
   1  -2  -9    1.79    0.12
   1  -2  -9    1.82    0.11
   2   9   1    1.57    0.11
  -1   2  -9    1.56    0.09
  -9  -1   2    1.63    0.10
  -2   9  -1    1.90    0.11
  -9   1  -2    1.81    0.10
   9  -1  -2    1.54    0.10
  -2   9   3    1.40    0.10
  -2   9   3    1.55    0.09
   9   3  -2    1.28    0.11
  -9   3   2    1.35    0.11
  -9   3   2    1.52    0.09
  -2   9   3    1.30    0.08
  -2   9   3    1.54    0.09
   9  -3   2    1.39    0.09
  -3  -2  -9    1.57    0.10
   2  -9   3    1.60    0.09
   2  -9   3    1.38    0.09
   2   9  -3    1.38    0.09
   2   9  -3    1.58    0.10
   9   3  -2    1.41    0.11
   3   2  -9    1.56    0.07
  -9   3   2    1.62    0.07
   3   2  -9    1.53    0.12
   3   2  -9    1.63    0.10
   3  -2   9    1.24    0.08
  -2  -9  -3    1.42    0.08
   3  -2   9    1.43    0.08
  -2  -9  -3    1.36    0.09
  -9  -3  -2    1.62    0.10
  -9  -3  -2    1.56    0.10
  -3  -2  -9    1.45    0.11
  -3  -2  -9    1.53    0.10
   9   3  -2    1.36    0.09
   9  -3   2    1.44    0.09
  -9  -3  -2    1.54    0.08
  -3   2   9    1.56    0.09
  -3   2   9    1.43    0.08
  -3   2  -9    1.42    0.10
   3   2   9    1.46    0.09
  -9   3  -2    1.30    0.10
  -3   2  -9    1.34    0.11
  -3  -2   9    1.54    0.09
   3   2   9    1.44    0.08
   9   3   2    1.23    0.10
   9   3   2    1.54    0.10
   9   3   2    1.37    0.08
   3  -2  -9    1.45    0.10
  -9  -3   2    1.42    0.09
  -9  -3   2    1.50    0.08
  -3  -2   9    1.66    0.08
   9  -3  -2    1.64    0.09
   9  -3  -2    1.43    0.10
  -2  -9   3    1.29    0.08
  -2  -9   3    1.55    0.10
  -2  -9   3    1.54    0.10
  -2   9  -3    1.55    0.09
  -2   9  -3    1.56    0.11
  -2   9  -3    1.53    0.07
   3  -2  -9    1.47    0.11
   2   9   3    1.56    0.09
   2   9   3    1.46    0.10
  -9   3  -2    1.39    0.09
  -9   5   2    2.01    0.13
  -5  -2  -9    2.25    0.14
   2   9  -5    2.20    0.13
   5   2  -9    2.04    0.09
  -5   2   9    2.23    0.11
   2  -9   5    2.00    0.11
  -5   2   9    2.12    0.11
   2   9  -5    2.01    0.11
   5  -2   9    2.07    0.11
   5  -2   9    2.33    0.10
  -2  -9  -5    2.29    0.09
  -2  -9  -5    2.18    0.11
  -2   9   5    2.24    0.10
  -2   9   5    2.20    0.11
  -9  -5  -2    2.01    0.13
   9  -5   2    2.04    0.11
  -2  -9  -5    2.03    0.11
   5   2  -9    2.03    0.14
   5   2  -9    1.86    0.11
  -5  -2  -9    2.37    0.12
  -9   5   2    2.01    0.09
   9  -5   2    2.37    0.12
   2  -9   5    2.10    0.10
  -2   9   5    2.01    0.12
  -9  -5  -2    2.19    0.13
   9   5  -2    2.17    0.13
   9   5  -2    2.04    0.11
  -9  -5   2    2.12    0.12
   2  -9  -5    2.11    0.11
  -5   2  -9    2.02    0.12
  -2  -9   5    2.01    0.11
   5   2   9    1.98    0.11
   5   2   9    2.33    0.11
   5  -2  -9    2.00    0.11
  -9   5  -2    2.09    0.11
   2   9   5    2.21    0.11
  -5   2  -9    2.32    0.14
  -2  -9   5    2.24    0.09
   9  -5  -2    1.91    0.12
   9   5   2    2.17    0.11
  -2   9  -5    1.95    0.11
  -2   9  -5    1.94    0.13
   5  -2  -9    2.16    0.14
  -2   9  -5    2.08    0.08
   2   9   5    2.09    0.13
   9  -5  -2    2.12    0.10
   9   5   2    2.16    0.10
   2  -9  -5    2.07    0.11
   9   5   2    1.95    0.13
  -9  -5   2    2.11    0.12
  -9  -5   2    2.21    0.11
  -9   5  -2    2.37    0.13
  -5  -2   9    1.93    0.10
  -5  -2   9    2.04    0.11
   9   5   2    2.23    0.13
  -2  -9   5    2.14    0.12
  -2  -9  -7   12.94    0.44
   2  -9   7   13.01    0.45
   2   9  -7   12.70    0.45
   9  -7   2   12.33    0.45
   7  -2   9   12.61    0.44
   7   2  -9   12.04    0.44
   2  -9   7   12.56    0.43
   9   7  -2   12.49    0.47
  -7  -2  -9   12.77    0.45
   9   7  -2   12.54    0.45
   2   9  -7   12.35    0.48
   9  -7   2   13.19    0.43
  -2  -9  -7   12.68    0.46
  -9  -7  -2   12.77    0.48
  -9  -7  -2   12.70    0.47
  -9   7   2   12.97    0.44
   7  -2   9   12.47    0.45
  -7  -2  -9   12.12    0.48
  -2  -9  -7   12.30    0.46
   7   2  -9   11.85    0.48
   7   2  -9   12.75    0.45
  -2   9   7   12.59    0.43
  -2   9   7   12.29    0.46
  -2   9   7   12.35    0.47
  -9   7   2   12.16    0.45
  -9   7   2   12.52    0.48
  -7  -2  -9   12.86    0.46
  -7   2   9   12.25    0.45
  -7   2   9   12.39    0.45
   9   7   2   12.48    0.46
  -9  -7   2   12.78    0.46
  -9  -7   2   12.86    0.47
   9   7   2   12.18    0.47
  -9   7  -2   12.58    0.45
  -7  -2   9   12.70    0.44
  -7  -2   9   12.22    0.45
  -7   2  -9   12.47    0.47
  -7   2  -9   12.12    0.46
  -7   2  -9   12.57    0.43
   7  -2  -9   12.34    0.46
   7  -2  -9   12.10    0.48
   2  -9  -7   12.02    0.45
  -2   9  -7   12.77    0.45
   2  -9  -7   12.72    0.46
  -2  -9   7   12.78    0.45
  -2  -9   7   12.66    0.46
   9  -7  -2   12.39    0.44
   7   2   9   13.05    0.44
  -2   9  -7   11.79    0.48
   2   9   7   12.31    0.45
   2   9   7   12.43    0.47
   7   2   9   12.44    0.46
  -9  -7   2   12.80    0.46
  -9   7  -2   12.46    0.48
   7   2   9   13.19    0.45
   9  -7  -2   12.48    0.46
   2  -9  -7   12.86    0.44
   9   7   2   12.98    0.43
   0  -3  -9    0.06    0.04
   0   3  -9    0.03    0.02
   3   9   0    0.08    0.04
   0  -3   9    0.00    0.03
   9   0   3   -0.01    0.03
   3   9   0   -0.02    0.03
   0  -3  -9    0.05    0.04
  -3  -9   0    0.02    0.04
  -3  -9   0    0.08    0.04
   9   0  -3   -0.06    0.04
   9   0  -3    0.00    0.04
  -3   9   0    0.03    0.03
   0   3  -9   -0.03    0.05
  -9   0  -3   -0.01    0.03
  -9   0  -3    0.00    0.03
  -9   0  -3   -0.03    0.04
   9   0  -3   -0.06    0.03
  -9   0   3   -0.04    0.03
  -9   0   3    0.02    0.02
   3   9   0    0.02    0.03
  -3   9   0    0.01    0.03
  -3   9   0    0.04    0.04
   0  -3  -9   -0.01    0.02
  -3   9   0    0.01    0.02
   0   3  -9    0.02    0.02
   9   0   3    0.05    0.02
   0   3  -9    0.10    0.05
  -3  -9   0    0.05    0.02
   0   3   9    0.02    0.02
   0   3   9   -0.01    0.03
   9   0   3    0.00    0.03
  -3   9   2    1.60    0.10
  -9  -2  -3    1.40    0.10
  -3  -9  -2    1.65    0.10
   9  -2   3    1.30    0.09
  -9  -2  -3    1.34    0.08
  -2   3   9    1.48    0.09
  -3   9   2    1.47    0.08
  -2  -3  -9    1.44    0.11
  -2  -3  -9    1.53    0.09
   9   2  -3    1.32    0.10
   9   2  -3    1.51    0.11
   9   2  -3    1.56    0.10
   3   9  -2    1.49    0.09
   2   3  -9    1.56    0.07
  -3  -9  -2    1.41    0.08
  -2   3   9    1.34    0.09
  -9   2   3    1.61    0.09
  -9   2   3    1.55    0.07
   2  -3   9    1.46    0.08
   2  -3   9    1.53    0.09
  -3  -9  -2    1.41    0.10
   2   3  -9    1.29    0.11
   2   3  -9    1.26    0.10
  -9  -2  -3    1.36    0.09
  -2  -3  -9    1.41    0.10
   3  -9   2    1.64    0.09
  -3   9   2    1.53    0.08
  -3   9   2    1.60    0.10
   3   9  -2    1.46    0.09
   2  -3  -9    1.33    0.11
  -9   2  -3    1.31    0.09
  -2  -3   9    1.50    0.07
  -3   9  -2    1.53    0.11
  -9   2  -3    1.36    0.10
   9  -2  -3    1.50    0.09
   9  -2  -3    1.46    0.11
   2   3   9    1.41    0.09
  -2   3  -9    1.35    0.11
   9   2   3    1.51    0.09
  -3  -9   2    1.29    0.10
   2   3   9    1.30    0.08
   9   2   3    1.37    0.10
  -3   9  -2    1.57    0.07
   9  -2  -3    1.49    0.11
   9   2   3    1.41    0.08
   3   9   2    1.50    0.09
   3   9   2    1.57    0.07
  -3  -9   2    1.49    0.10
  -9  -2   3    1.44    0.09
   2  -3  -9    1.48    0.10
  -2  -3   9    1.50    0.09
   3   9   2    1.52    0.10
  -3  -9   2    1.38    0.09
  -2   3  -9    1.50    0.09
  -9  -2   3    1.59    0.08
   4   3  -9    0.64    0.07
  -4  -3  -9    0.78    0.08
  -4   3   9    0.69    0.06
  -4   3   9    0.68    0.06
  -3  -9  -4    0.68    0.04
  -3  -9  -4    0.65    0.06
  -9  -4  -3    0.76    0.06
   3  -9   4    0.80    0.06
  -3   9   4    0.77    0.06
   9  -4   3    0.69    0.07
  -3  -9  -4    0.69    0.07
   9  -4   3    0.74    0.07
   3  -9   4    0.82    0.06
   3   9  -4    0.73    0.07
   9   4  -3    0.75    0.08
  -9   4   3    0.75    0.07
  -9   4   3    0.70    0.05
  -9  -4  -3    0.74    0.08
  -4  -3  -9    0.59    0.08
   4   3  -9    0.79    0.05
   9   4  -3    0.74    0.07
  -3   9   4    0.86    0.06
   3   9  -4    0.73    0.07
  -9  -4  -3    0.72    0.07
   4   3  -9    0.72    0.09
   4  -3   9    0.66    0.06
   4  -3   9    0.64    0.06
  -4  -3  -9    0.82    0.07
  -3   9   4    0.82    0.07
  -3   9   4    0.74    0.07
  -4   3  -9    0.81    0.07
   4  -3  -9    0.59    0.08
  -9  -4   3    0.72    0.07
   4   3   9    0.67    0.06
   4   3   9    0.73    0.04
  -4  -3   9    0.77    0.05
   9   4   3    0.61    0.07
  -4   3  -9    0.66    0.08
  -9  -4   3    0.82    0.06
  -9   4  -3    0.73    0.08
  -3   9  -4    0.61    0.08
  -3  -9   4    0.70    0.07
   9   4   3    0.67    0.08
  -3  -9   4    0.76    0.07
  -3   9  -4    0.81    0.04
  -9   4  -3    0.77    0.06
   9  -4  -3    0.70    0.07
   3   9   4    0.78    0.07
   3   9   4    0.65    0.08
  -4  -3   9    0.73    0.07
   9   4   3    0.83    0.07
  -3  -9   4    0.80    0.06
   9  -4  -3    0.86    0.06
  -3   9  -4    0.81    0.07
   9  -4  -3    0.75    0.08
   4  -3  -9    0.72    0.07
   4   3   9    0.78    0.07
   6  -3   9    0.01    0.03
  -3   9   6    0.00    0.02
   9   6  -3    0.03    0.04
   3  -9   6    0.03    0.02
  -6   3   9    0.02    0.03
  -6   3   9    0.04    0.04
  -3  -9  -6    0.02    0.03
  -3   9   6    0.01    0.03
  -9  -6  -3    0.02    0.05
   6   3  -9   -0.03    0.05
   3  -9   6    0.00    0.03
  -9   6   3   -0.01    0.03
  -9   6   3    0.07    0.03
  -6  -3  -9    0.02    0.03
   9   6  -3   -0.03    0.04
  -9   6   3   -0.02    0.05
   3   9  -6    0.03    0.03
  -9  -6  -3    0.02    0.05
   6  -3   9   -0.02    0.03
   6   3  -9    0.03    0.02
   9  -6   3    0.06    0.03
  -3   9   6   -0.05    0.04
   3   9  -6    0.01    0.05
  -6  -3  -9    0.03    0.05
  -3  -9  -6   -0.01    0.04
  -3  -9  -6    0.00    0.04
   6   3  -9   -0.04    0.03
  -9  -6   3    0.03    0.04
   3  -9  -6    0.04    0.04
  -9   6  -3    0.02    0.03
  -6   3  -9    0.01    0.05
   9   6   3    0.03    0.04
  -6  -3   9    0.03    0.04
  -3   9  -6    0.00    0.01
  -9  -6   3   -0.01    0.04
   3  -9  -6   -0.04    0.03
   6  -3  -9    0.05    0.05
   6  -3  -9    0.08    0.06
  -6  -3   9    0.03    0.03
   6  -3  -9    0.03    0.04
  -3  -9   6    0.02    0.02
  -3  -9   6    0.06    0.04
  -3  -9   6    0.02    0.04
  -3   9  -6   -0.01    0.03
  -3   9  -6   -0.02    0.05
   6   3   9    0.04    0.02
   6   3   9   -0.04    0.03
   3   9   6    0.00    0.04
   9   6   3    0.00    0.02
   3  -9  -6    0.01    0.03
   3   9   6    0.07    0.05
  -9  -6   3    0.01    0.03
   6   3   9    0.08    0.04
   9  -6  -3    0.06    0.04
   9   6   3    0.02    0.05
  -6   3  -9    0.06    0.04
  -9   6  -3   -0.04    0.04
   9  -6  -3    0.01    0.03
   3   9  -8    0.59    0.06
   9   8  -3    0.77    0.08
   9   8  -3    0.71    0.08
  -9   8   3    0.65    0.06
   8  -3   9    0.63    0.05
  -3   9   8    0.64    0.05
  -3   9   8    0.57    0.07
   3  -9   8    0.60    0.06
   8   3  -9    0.46    0.06
  -9   8   3    0.60    0.06
  -3   9   8    0.61    0.07
   3   9  -8    0.59    0.09
  -8  -3  -9    0.75    0.09
  -8  -3  -9    0.73    0.07
  -8   3   9    0.59    0.06
  -8   3   9    0.57    0.06
   8  -3   9    0.67    0.07
   9  -8   3    0.61    0.05
  -9  -8  -3    0.46    0.07
   8   3  -9    0.52    0.09
   8   3  -9    0.58    0.05
  -9   8   3    0.48    0.08
  -3  -9  -8    0.74    0.08
  -3  -9  -8    0.80    0.09
  -8  -3  -9    0.81    0.07
  -3  -9  -8    0.82    0.06
  -9  -8  -3    0.69    0.09
   9  -8   3    0.63    0.06
   8  -3  -9    0.51    0.04
   8  -3  -9    0.52    0.06
  -8  -3   9    0.63    0.06
  -8  -3   9    0.54    0.07
   8   3   9    0.74    0.06
   8   3   9    0.77    0.07
  -8   3  -9    0.69    0.09
   8  -3  -9    0.59    0.08
   3   9   8    0.74    0.08
   9   8   3    0.70    0.09
  -3   9  -8    0.59    0.09
  -3   9  -8    0.52    0.06
  -9   8  -3    0.78    0.06
   8  -3  -9    0.46    0.08
   3   9   8    0.68    0.07
  -9  -8   3    0.57    0.08
  -9  -8   3    0.69    0.07
   8   3   9    0.80    0.08
  -9   8  -3    0.62    0.09
  -9  -8   3    0.77    0.07
   9   8   3    0.70    0.08
  -3  -9   8    0.52    0.07
   9  -8  -3    0.58    0.07
   9  -8  -3    0.59    0.06
   3  -9  -8    0.60    0.07
   3  -9  -8    0.81    0.06
   3  -9  -8    0.59    0.07
  -8   3  -9    0.86    0.08
   4   9  -1   -0.02    0.03
  -1  -4  -9    0.04    0.04
   9   1  -4    0.02    0.04
  -9   1   4   -0.01    0.03
  -1   4   9   -0.02    0.03
  -1   4   9   -0.03    0.03
   4   9  -1    0.04    0.04
  -9  -1  -4    0.00    0.03
  -4  -9  -1    0.01    0.04
  -1  -4  -9    0.08    0.04
  -9   1   4    0.02    0.02
   1  -4   9    0.03    0.03
  -1  -4  -9    0.05    0.04
  -4   9   1    0.07    0.04
  -4   9   1   -0.01    0.02
  -4   9   1    0.04    0.04
  -1   4   9    0.01    0.02
   1   4  -9   -0.03    0.02
   1   4  -9    0.00    0.05
   1   4  -9   -0.01    0.04
   1   4  -9    0.02    0.02
  -9  -1  -4   -0.08    0.04
   9   1  -4    0.04    0.05
  -4  -9  -1    0.00    0.02
  -4  -9  -1    0.02    0.04
   9  -1   4    0.02    0.02
   9   1  -4    0.00    0.04
  -4   9   1    0.01    0.03
  -9  -1  -4   -0.01    0.03
   9  -1   4    0.00    0.03
   9  -1   4   -0.02    0.03
   4   9   1    0.02    0.02
   4   9   1   -0.02    0.04
   9  -1  -4    0.01    0.04
   9  -1  -4   -0.05    0.04
   9  -1  -4   -0.01    0.04
   9   1   4    0.02    0.03
  -9   1  -4    0.01    0.02
  -9  -1   4    0.02    0.03
  -9  -1   4    0.01    0.03
  -4  -9   1    0.01    0.04
   9   1   4    0.02    0.02
  -1  -4   9    0.02    0.04
   4   9   1    0.00    0.04
   1  -4  -9   -0.02    0.04
   9   1   4    0.06    0.04
   1   4   9    0.01    0.03
   1   4   9    0.04    0.04
  -4   9  -1    0.04    0.04
   1  -4  -9    0.00    0.04
  -4   9  -1    0.04    0.03
  -1   4  -9    0.03    0.05
  -9   1  -4    0.00    0.04
  -4   9  -1   -0.03    0.03
  -4   9  -1   -0.01    0.02
  -9   1  -4    0.00    0.04
  -1   4  -9    0.01    0.03
  -4  -9   1   -0.02    0.04
  -4  -9   1    0.03    0.04
  -1   4  -9    0.04    0.03
  -3   4   9    0.66    0.07
  -3   4   9    0.67    0.06
  -4  -9  -3    0.73    0.06
   3  -4   9    0.75    0.06
   9   3  -4    0.74    0.07
  -4   9   3    0.71    0.07
   9  -3   4    0.63    0.06
   3  -4   9    0.72    0.06
   3   4  -9    0.80    0.05
   9   3  -4    0.82    0.08
  -3  -4  -9    0.65    0.07
  -3  -4  -9    0.69    0.08
  -3  -4  -9    0.60    0.07
  -4  -9  -3    0.57    0.07
   4   9  -3    0.71    0.07
   4  -9   3    0.68    0.06
  -9  -3  -4    0.74    0.06
  -9  -3  -4    0.69    0.08
  -4  -9  -3    0.66    0.07
   3   4  -9    0.72    0.09
   4   9  -3    0.60    0.07
   3   4  -9    0.71    0.07
  -4   9   3    0.63    0.06
  -4   9   3    0.69    0.07
  -4   9   3    0.68    0.05
  -9   3   4    0.67    0.06
   9  -3   4    0.67    0.06
   4  -9   3    0.83    0.06
  -9   3   4    0.75    0.05
  -9  -3  -4    0.66    0.07
  -9  -3   4    0.71    0.06
   9  -3  -4    0.72    0.08
   9  -3  -4    0.78    0.06
   9   3   4    0.72    0.06
  -4  -9   3    0.87    0.07
  -4  -9   3    0.76    0.07
   3   4   9    0.65    0.06
  -4   9  -3    0.75    0.06
   4   9   3    0.76    0.08
   4   9   3    0.66    0.07
  -3  -4   9    0.69    0.06
  -9   3  -4    0.77    0.08
  -4  -9   3    0.86    0.07
  -4   9  -3    0.70    0.05
   3  -4  -9    0.64    0.07
  -4   9  -3    0.76    0.08
  -3   4  -9    0.69    0.06
  -3  -4   9    0.80    0.05
   9   3   4    0.66    0.08
   9   3   4    0.61    0.06
  -3   4  -9    0.70    0.08
   3   4   9    0.69    0.07
   3  -4  -9    0.59    0.08
  -9  -3   4    0.80    0.06
  -9   3  -4    0.64    0.06
   9  -3  -4    0.61    0.08
   5  -4   9    0.02    0.03
  -9   5   4    0.00    0.03
  -4  -9  -5    0.05    0.04
  -4   9   5    0.05    0.04
   9   5  -4    0.00    0.04
  -5  -4  -9    0.04    0.05
  -5  -4  -9    0.09    0.05
   5  -4   9    0.01    0.03
   9   5  -4    0.06    0.05
   9  -5   4    0.08    0.04
   5   4  -9    0.05    0.04
  -9  -5  -4    0.00    0.02
  -5  -4  -9    0.00    0.03
  -4  -9  -5   -0.02    0.04
  -4  -9  -5    0.02    0.04
  -4   9   5    0.03    0.03
  -9   5   4    0.02    0.03
   4   9  -5   -0.07    0.04
   5   4  -9   -0.01    0.06
   4  -9   5    0.01    0.02
   4  -9   5    0.01    0.03
   4   9  -5    0.03    0.04
   5   4  -9    0.03    0.02
  -4   9   5    0.02    0.02
  -5   4   9    0.02    0.03
  -9  -5  -4    0.07    0.05
  -9  -5  -4   -0.01    0.04
  -5   4   9    0.03    0.03
   5   4   9   -0.03    0.04
  -9  -5   4    0.01    0.03
   9   5   4    0.03    0.04
   4   9   5    0.00    0.04
   5  -4  -9    0.07    0.04
   9   5   4    0.00    0.04
   9   5   4    0.01    0.05
   9  -5  -4    0.04    0.05
  -4  -9   5    0.00    0.04
  -4   9  -5    0.02    0.03
  -4  -9   5    0.03    0.02
  -4   9  -5    0.03    0.02
  -4  -9   5    0.01    0.04
  -5  -4   9    0.01    0.02
  -5  -4   9    0.02    0.04
  -5   4  -9   -0.02    0.05
   9  -5  -4    0.03    0.03
  -5   4  -9    0.06    0.03
  -9  -5   4   -0.03    0.03
  -4   9  -5   -0.06    0.05
   5  -4  -9    0.05    0.04
   5   4   9    0.01    0.02
   4   9   5    0.06    0.05
   4  -9  -5    0.01    0.04
   5  -4  -9    0.01    0.05
  -9   5  -4    0.00    0.04
   4  -9  -5    0.04    0.03
  -9   5  -4    0.01    0.03
   5   4   9   -0.02    0.03
   9  -5  -4    0.00    0.04
  -9  -7  -4    0.39    0.07
  -4  -9  -7    0.59    0.07
  -7  -4  -9    0.48    0.08
   9  -7   4    0.37    0.05
   4  -9   7    0.61    0.04
  -9  -7  -4    0.36    0.07
  -9   7   4    0.63    0.06
  -9   7   4    0.59    0.06
   9   7  -4    0.49    0.07
   7   4  -9    0.58    0.09
   7   4  -9    0.56    0.05
  -4   9   7    0.51    0.04
   7  -4   9    0.55    0.06
  -7   4   9    0.52    0.06
  -7   4   9    0.52    0.06
  -4  -9  -7    0.57    0.05
   4   9  -7    0.42    0.06
  -4  -9  -7    0.51    0.07
  -7  -4  -9    0.40    0.05
   4   9  -7    0.41    0.08
   7   4  -9    0.61    0.06
  -4   9   7    0.54    0.07
  -4   9   7    0.52    0.06
   4  -9   7    0.53    0.06
   9   7  -4    0.57    0.07
  -7  -4  -9    0.50    0.06
   9  -7   4    0.45    0.04
   7  -4   9    0.56    0.05
   4  -9  -7    0.60    0.06
   7   4   9    0.43    0.04
  -9  -7   4    0.47    0.06
  -4  -9   7    0.36    0.05
   7  -4  -9    0.41    0.07
   7  -4  -9    0.40    0.08
   7  -4  -9    0.41    0.06
  -7   4  -9    0.56    0.06
   7   4   9    0.50    0.06
  -4  -9   7    0.47    0.06
   4   9   7    0.59    0.07
   4  -9  -7    0.47    0.05
   4  -9  -7    0.50    0.07
   4   9   7    0.44    0.07
   9  -7  -4    0.60    0.07
  -7  -4   9    0.62    0.05
  -9  -7   4    0.56    0.07
  -9  -7   4    0.54    0.06
  -9   7  -4    0.56    0.08
  -9   7  -4    0.40    0.05
   7   4   9    0.52    0.07
  -7  -4   9    0.62    0.07
  -4  -9   7    0.50    0.04
   9   7   4    0.63    0.07
   9  -7  -4    0.66    0.05
  -7   4  -9    0.50    0.08
   9   7   4    0.57    0.08
  -4   9  -7    0.58    0.04
  -4   9  -7    0.58    0.06
  -4   9  -7    0.44    0.08
  -9   0  -5   -0.05    0.03
  -5   9   0   -0.01    0.03
   9   0   5    0.01    0.03
   9   0  -5   -0.04    0.04
   9   0   5    0.00    0.04
   0  -5  -9    0.00    0.04
   0  -5  -9    0.00    0.03
   0  -5  -9   -0.02    0.04
   5   9   0    0.02    0.02
   5   9   0    0.07    0.04
   9   0   5    0.00    0.02
   0   5   9    0.02    0.03
   0   5   9   -0.03    0.03
   9   0  -5   -0.03    0.05
  -5   9   0   -0.02    0.02
  -9   0   5    0.01    0.03
   9   0  -5   -0.02    0.04
   0  -5   9    0.04    0.03
   0   5  -9    0.00    0.02
   0   5  -9   -0.03    0.05
   0   5  -9    0.02    0.02
  -5   9   0    0.04    0.04
  -9   0  -5    0.01    0.04
   5   9   0   -0.02    0.04
  -9   0   5    0.00    0.03
  -9   0  -5   -0.03    0.03
  -5  -9   0   -0.01    0.04
  -5   9   0    0.00    0.03
  -5  -9   0   -0.02    0.04
  -2   5   9    2.10    0.11
  -5   9   2    2.14    0.10
  -2   5   9    2.20    0.11
  -2  -5  -9    2.18    0.12
   9   2  -5    2.00    0.12
  -5  -9  -2    2.04    0.13
   2   5  -9    1.96    0.14
   9  -2   5    2.25    0.09
   9  -2   5    2.04    0.11
   9   2  -5    2.15    0.14
   9   2  -5    1.87    0.12
  -5   9   2    2.17    0.13
   9  -2   5    2.07    0.11
   5   9  -2    2.18    0.12
  -2  -5  -9    1.99    0.11
  -9   2   5    1.93    0.11
  -9  -2  -5    2.19    0.11
  -5  -9  -2    2.20    0.13
  -9   2   5    2.05    0.10
  -5  -9  -2    2.30    0.10
  -5   9   2    2.09    0.10
  -5   9   2    2.09    0.11
   5   9  -2    2.28    0.11
  -2  -5  -9    1.98    0.12
  -9  -2  -5    2.12    0.11
   5  -9   2    2.01    0.10
   2   5  -9    1.89    0.12
  -9  -2  -5    1.94    0.13
   2  -5   9    2.25    0.11
   2   5  -9    2.02    0.10
  -2   5  -9    1.98    0.14
   9  -2  -5    1.98    0.13
  -5  -9   2    2.17    0.12
   2   5   9    2.12    0.11
   9   2   5    2.03    0.11
   9   2   5    2.28    0.10
  -2   5  -9    2.15    0.09
   9   2   5    2.16    0.12
  -5  -9   2    2.16    0.12
   5   9   2    2.10    0.12
  -5  -9   2    1.94    0.13
  -5   9  -2    2.01    0.13
   9  -2  -5    2.29    0.13
  -9  -2   5    1.99    0.11
  -9  -2   5    1.91    0.10
  -9   2  -5    2.32    0.13
   2  -5  -9    2.17    0.13
  -2   5  -9    2.11    0.10
  -2  -5   9    2.05    0.08
  -2  -5   9    2.01    0.11
  -5   9  -2    1.99    0.10
   2   5   9    2.22    0.12
  -5   9  -2    2.03    0.09
   5   9   2    2.18    0.13
   9  -2  -5    1.93    0.11
  -9   2  -5    2.18    0.12
   2  -5  -9    2.11    0.12
   9  -4   5    0.00    0.02
   9   4  -5    0.01    0.04
  -5  -9  -4   -0.03    0.05
  -9   4   5    0.03    0.03
  -9   4   5   -0.02    0.03
   4  -5   9    0.04    0.03
  -5   9   4    0.02    0.03
  -5  -9  -4   -0.01    0.03
  -4  -5  -9    0.05    0.04
   5  -9   4    0.03    0.03
   5  -9   4   -0.03    0.03
   9  -4   5   -0.01    0.03
  -5   9   4    0.02    0.04
  -4  -5  -9    0.01    0.03
  -4  -5  -9    0.08    0.05
   4   5  -9   -0.05    0.05
   5   9  -4    0.02    0.04
  -9  -4  -5    0.00    0.05
  -9  -4  -5    0.04    0.04
   4   5  -9    0.02    0.03
  -4   5   9    0.01    0.03
  -9  -4  -5   -0.01    0.02
   4  -5   9    0.00    0.03
  -5   9   4    0.00    0.02
   9   4  -5   -0.06    0.04
   5   9  -4   -0.01    0.04
   4   5  -9    0.05    0.04
  -4   5   9    0.02    0.03
  -5   9   4    0.09    0.05
  -5  -9  -4    0.00    0.04
  -9   4  -5    0.00    0.03
  -9  -4   5    0.00    0.03
   4  -5  -9    0.01    0.04
  -5   9  -4    0.02    0.03
   9   4   5    0.00    0.05
   4   5   9    0.02    0.04
  -9  -4   5   -0.01    0.03
   5  -9  -4    0.01    0.03
  -5  -9   4   -0.03    0.04
  -5  -9   4   -0.02    0.04
  -5   9  -4   -0.02    0.05
  -4  -5   9    0.04    0.04
  -4   5  -9    0.00    0.05
   9  -4  -5    0.01    0.03
   4  -5  -9    0.05    0.05
   9   4   5    0.02    0.04
  -9   4  -5    0.07    0.05
   9   4   5   -0.03    0.03
  -4  -5   9    0.01    0.02
   4   5   9    0.06    0.04
  -5  -9   4    0.06    0.03
  -5   9  -4    0.00    0.02
   5   9   4   -0.02    0.04
  -4   5  -9    0.00    0.03
   9  -4  -5    0.09    0.05
   9  -4  -5   -0.01    0.05
   4  -5  -9    0.03    0.04
   5   9   4   -0.01    0.04
   6   5  -9    0.15    0.07
  -9  -6  -5    0.20    0.03
  -5  -9  -6    0.19    0.06
  -5  -9  -6    0.11    0.05
  -5   9   6    0.12    0.04
   6  -5   9    0.15    0.04
  -5  -9  -6    0.20    0.05
  -9  -6  -5    0.18    0.07
   9   6  -5    0.09    0.05
   6   5  -9    0.15    0.04
  -6  -5  -9    0.23    0.04
  -6  -5  -9    0.23    0.06
  -9   6   5    0.13    0.04
  -9   6   5    0.17    0.04
   5  -9   6    0.17    0.03
   6   5  -9    0.22    0.04
   6  -5   9    0.15    0.04
  -6   5   9    0.17    0.04
  -5   9   6    0.12    0.05
   5  -9   6    0.19    0.04
  -9  -6  -5    0.20    0.06
   5   9  -6    0.12    0.04
   9   6  -5    0.19    0.06
   9  -6   5    0.23    0.03
   9  -6   5    0.12    0.04
   5   9  -6    0.12    0.06
  -6   5   9    0.29    0.05
  -5   9   6    0.15    0.03
  -6  -5   9    0.15    0.04
  -6  -5   9    0.17    0.03
   5  -9  -6    0.11    0.04
   5  -9  -6    0.11    0.05
   6  -5  -9    0.09    0.05
  -9   6  -5    0.22    0.04
  -5  -9   6    0.18    0.03
   9   6   5    0.19    0.05
   5   9   6    0.13    0.05
  -5   9  -6    0.18    0.04
   9   6   5    0.18    0.05
  -9   6  -5    0.11    0.06
  -5  -9   6    0.12    0.05
   9  -6  -5    0.21    0.05
   9  -6  -5    0.15    0.06
   5   9   6    0.27    0.06
  -6   5  -9    0.20    0.06
  -6   5  -9    0.20    0.04
   6  -5  -9    0.13    0.05
  -5  -9   6    0.15    0.05
   9  -6  -5    0.15    0.03
   6   5   9    0.21    0.03
   9   6   5    0.25    0.06
   6   5   9    0.17    0.05
   6  -5  -9    0.13    0.06
  -9  -6   5    0.16    0.04
  -9  -6   5    0.12    0.04
   6   5   9    0.13    0.04
  -5   9  -6    0.17    0.03
  -5   9  -6    0.17    0.06
  -9  -8  -5    0.99    0.11
  -5   9   8    0.92    0.09
  -5   9   8    1.06    0.06
   8   5  -9    0.99    0.11
   9   8  -5    0.92    0.09
  -8   5   9    0.76    0.08
   8  -5   9    1.11    0.09
   9  -8   5    1.02    0.06
  -8  -5  -9    0.93    0.09
  -9  -8  -5    0.89    0.10
  -5   9   8    0.94    0.08
  -9   8   5    0.84    0.08
  -8   5   9    0.85    0.08
   9   8  -5    1.00    0.05
   5  -9   8    0.96    0.08
   5   9  -8    0.93    0.08
   5   9  -8    0.89    0.11
   8   5  -9    0.98    0.08
   9   8  -5    1.04    0.10
   8  -5   9    1.02    0.07
   8   5  -9    1.01    0.08
  -9   8   5    1.05    0.08
  -5  -9  -8    1.08    0.10
  -5  -9  -8    0.90    0.10
   9  -8   5    0.98    0.08
  -8  -5  -9    1.04    0.11
  -8  -5  -9    1.20    0.08
  -5  -9  -8    0.99    0.06
  -8  -5   9    0.97    0.07
   8   5   9    1.28    0.10
   8   5   9    1.09    0.07
   8   5   9    1.04    0.09
  -9   8  -5    1.03    0.07
   5  -9  -8    1.03    0.08
  -9  -8   5    1.03    0.08
  -8   5  -9    0.97    0.08
   9  -8  -5    0.87    0.10
   9  -8  -5    0.93    0.09
   9   8   5    0.93    0.10
  -9   8  -5    0.92    0.11
   5   9   8    1.01    0.09
   5   9   8    0.96    0.10
  -5  -9   8    0.97    0.09
  -5   9  -8    0.93    0.11
   5  -9  -8    1.10    0.09
   8  -5  -9    0.71    0.10
   9   8   5    1.01    0.10
  -8   5  -9    1.02    0.11
   8  -5  -9    0.91    0.09
  -5   9  -8    0.89    0.05
   9  -8  -5    0.96    0.07
  -9  -8   5    1.01    0.09
  -9  -8   5    0.97    0.09
  -5  -9   8    0.98    0.05
   5  -9  -8    1.22    0.10
  -8  -5   9    0.83    0.08
   9   1  -6    8.53    0.33
   1   6  -9    8.55    0.37
  -6  -9  -1    9.08    0.36
  -6   9   1    8.77    0.33
  -1  -6  -9    8.91    0.34
   9  -1   6    9.30    0.34
   9  -1   6    9.04    0.32
  -6   9   1    8.86    0.33
   6   9  -1    9.43    0.33
  -9   1   6    8.97    0.33
  -9   1   6    9.01    0.34
  -6   9   1    8.82    0.35
   1  -6   9    8.99    0.34
   6   9  -1    9.11    0.35
  -1  -6  -9    9.35    0.34
  -1   6   9    8.99    0.34
  -6   9   1    8.82    0.33
  -1  -6  -9    9.16    0.35
   9  -1   6    8.87    0.34
  -9  -1  -6    9.14    0.33
  -1   6   9    9.21    0.31
   1   6  -9    9.16    0.33
  -9  -1  -6    9.08    0.34
   9   1  -6    8.44    0.35
  -1   6   9    9.57    0.34
  -9  -1  -6    9.25    0.36
   9   1  -6    8.50    0.36
  -6  -9  -1    9.32    0.35
  -9   1  -6    9.34    0.35
  -6   9  -1    8.90    0.32
   6   9   1    8.77    0.35
  -1   6  -9    8.50    0.33
  -6   9  -1    9.36    0.33
   9  -1  -6    9.21    0.33
  -9  -1   6    8.77    0.33
   1   6   9    9.17    0.33
  -6   9  -1    8.76    0.36
  -1  -6   9    9.17    0.34
  -9  -1   6    8.84    0.33
   1   6   9    9.57    0.35
  -9   1  -6    9.31    0.32
   9   1   6    9.51    0.33
   9  -1  -6    8.60    0.36
   1  -6  -9    9.43    0.35
   9  -1  -6    9.01    0.36
   9   1   6    9.24    0.35
  -6  -9   1    8.84    0.35
   6   9   1    8.99    0.35
   9   1   6    9.38    0.33
  -9   1  -6    9.43    0.35
  -6  -9   1    8.66    0.36
   1  -6  -9    9.27    0.35
  -6  -9   1    8.60    0.35
  -3  -6  -9    0.05    0.04
  -3  -6  -9    0.03    0.05
  -3  -6  -9    0.04    0.04
  -3   6   9   -0.01    0.03
  -6   9   3    0.06    0.04
  -6  -9  -3    0.07    0.05
   6  -9   3    0.06    0.03
   6   9  -3   -0.01    0.04
   3  -6   9    0.03    0.03
  -3   6   9    0.03    0.04
  -6  -9  -3    0.01    0.05
  -6   9   3    0.05    0.03
   9   3  -6    0.02    0.05
  -9  -3  -6    0.05    0.06
   9  -3   6    0.03    0.04
   9  -3   6   -0.01    0.02
   9   3  -6    0.02    0.04
  -9  -3  -6    0.02    0.03
   6   9  -3    0.04    0.04
  -6   9   3    0.04    0.05
   3   6  -9    0.01    0.05
   3   6  -9    0.09    0.04
   3   6  -9    0.00    0.03
  -9   3   6    0.01    0.03
  -6   9   3    0.02    0.03
  -9  -3  -6    0.05    0.04
  -9   3   6    0.00    0.03
   9  -3  -6    0.06    0.05
  -9   3  -6    0.04    0.04
   9   3   6    0.02    0.03
   9   3   6    0.00    0.03
  -9  -3   6    0.02    0.03
  -9   3  -6    0.05    0.05
  -3   6  -9    0.03    0.02
   9  -3  -6   -0.01    0.03
  -6  -9   3   -0.04    0.04
  -6  -9   3   -0.06    0.04
   9   3   6   -0.03    0.04
  -6   9  -3    0.00    0.02
  -9  -3   6    0.01    0.03
  -3  -6   9    0.02    0.02
  -3  -6   9    0.00    0.04
  -6   9  -3    0.02    0.05
   3  -6  -9    0.08    0.05
   3  -6  -9    0.01    0.04
  -3   6  -9    0.03    0.06
   9  -3  -6   -0.01    0.05
  -6   9  -3    0.00    0.03
  -6  -9   3    0.02    0.04
   3   6   9    0.01    0.04
   3  -6  -9    0.01    0.03
   6   9   3   -0.01    0.04
   6   9   3    0.00    0.04
   3   6   9   -0.01    0.04
   5  -6   9    0.22    0.04
   6   9  -5    0.17    0.05
  -9  -5  -6    0.20    0.03
  -9  -5  -6    0.12    0.06
  -9  -5  -6    0.22    0.05
  -9   5   6    0.15    0.04
  -5  -6  -9    0.19    0.06
  -5  -6  -9    0.22    0.04
   6  -9   5    0.18    0.03
   6   9  -5    0.21    0.05
  -5   6   9    0.13    0.04
  -6  -9  -5    0.20    0.05
  -6  -9  -5    0.20    0.06
  -6   9   5    0.17    0.04
  -6   9   5    0.28    0.05
   5  -6   9    0.19    0.04
  -5   6   9    0.09    0.04
   5   6  -9    0.13    0.04
   5   6  -9    0.19    0.05
   5   6  -9    0.12    0.07
   9  -5   6    0.10    0.04
   6  -9   5    0.16    0.03
   9   5  -6    0.25    0.05
   9   5  -6    0.25    0.06
  -9   5   6    0.24    0.05
   6  -9   5    0.15    0.04
  -6  -9  -5    0.19    0.06
  -5  -6  -9    0.17    0.06
   9  -5   6    0.15    0.03
   9   5   6    0.14    0.04
   5   6   9    0.19    0.05
   9  -5  -6    0.21    0.04
   5  -6  -9    0.15    0.06
   5  -6  -9    0.08    0.04
  -6   9  -5    0.25    0.07
  -6   9  -5    0.16    0.03
   6   9   5    0.20    0.06
   6  -9  -5    0.16    0.04
  -6  -9   5    0.22    0.05
  -5   6  -9    0.27    0.03
  -9   5  -6    0.11    0.04
  -9  -5   6    0.20    0.04
   5  -6  -9    0.08    0.04
   6  -9  -5    0.15    0.03
  -9  -5   6    0.17    0.04
  -5  -6   9    0.13    0.03
  -5  -6   9    0.13    0.05
  -5   6  -9    0.19    0.06
   6  -9  -5    0.11    0.05
   6   9   5    0.21    0.06
   9  -5  -6    0.21    0.06
   9  -5  -6    0.08    0.05
   5   6   9    0.18    0.05
   9   5   6    0.24    0.05
  -6  -9   5    0.22    0.04
  -9   5  -6    0.11    0.06
   9   5   6    0.13    0.06
  -6  -9   5    0.16    0.05
   9  -7   6    1.10    0.08
  -6  -9  -7    0.90    0.10
   7   6  -9    0.86    0.07
  -9  -7  -6    0.91    0.11
   7   6  -9    0.78    0.11
  -6   9   7    0.98    0.08
   6   9  -7    0.75    0.09
  -7   6   9    0.77    0.08
  -7   6   9    0.89    0.08
  -7  -6  -9    1.05    0.11
  -7  -6  -9    1.00    0.09
  -6  -9  -7    0.76    0.09
   7  -6   9    0.99    0.08
   9  -7   6    0.98    0.06
   6  -9   7    0.91    0.07
   6   9  -7    0.93    0.08
  -6  -9  -7    0.92    0.09
   7  -6   9    0.84    0.07
   7   6  -9    0.84    0.07
   9   7  -6    0.77    0.08
  -9   7   6    0.81    0.08
  -9   7   6    0.91    0.08
  -7  -6  -9    0.99    0.07
   9   7  -6    0.90    0.06
  -6   9   7    0.85    0.08
   9   7  -6    0.95    0.10
   6  -9   7    1.09    0.08
  -9  -7  -6    1.06    0.10
   7   6   9    1.06    0.09
   6  -9  -7    0.97    0.09
   6  -9  -7    0.90    0.08
   9   7   6    0.97    0.10
   7  -6  -9    0.97    0.08
  -6  -9   7    0.91    0.08
  -9  -7   6    0.87    0.07
  -9  -7   6    0.75    0.08
  -9   7  -6    0.84    0.10
  -9   7  -6    0.94    0.07
   9  -7  -6    0.75    0.08
   9  -7  -6    0.85    0.06
  -6  -9   7    0.94    0.06
   7  -6  -9    1.10    0.09
   7  -6  -9    0.94    0.10
  -7  -6   9    0.93    0.06
  -7  -6   9    0.77    0.08
  -7   6  -9    0.75    0.10
  -7   6  -9    0.97    0.07
   6   9   7    0.76    0.09
   6   9   7    0.76    0.09
   7   6   9    1.02    0.07
   7   6   9    1.04    0.09
   6  -9  -7    0.99    0.06
  -6  -9   7    0.87    0.09
   9  -7  -6    0.78    0.10
  -6   9  -7    0.67    0.10
  -6   9  -7    0.90    0.06
   9   7   6    0.92    0.09
  -9   0  -7    0.01    0.03
   9   0  -7    0.03    0.04
   7   9   0   -0.02    0.04
   7   9   0   -0.01    0.03
  -7  -9   0    0.02    0.05
  -7   9   0    0.03    0.05
   9   0  -7   -0.10    0.05
   9   0  -7    0.04    0.05
  -7   9   0    0.02    0.03
   0  -7  -9   -0.03    0.04
   0   7  -9   -0.03    0.03
   0   7  -9    0.13    0.06
   0   7   9    0.01    0.03
   0   7   9   -0.04    0.04
   7  -9   0    0.00    0.03
   7   9   0    0.01    0.04
  -9   0   7    0.00    0.03
  -7   9   0    0.03    0.03
   0  -7  -9    0.02    0.04
   0  -7   9   -0.03    0.03
   0  -7  -9    0.00    0.04
   9   0   7   -0.02    0.04
   9   0   7   -0.01    0.03
  -9   0  -7   -0.05    0.04
  -9   0  -7   -0.05    0.04
  -9   0   7   -0.03    0.03
   9   0   7    0.01    0.03
  -7  -9   0   -0.01    0.05
   7  -9   2   12.37    0.45
   7  -9   2   12.58    0.44
  -2  -7  -9   12.55    0.46
  -9  -2  -7   12.92    0.45
  -9   2   7   12.53    0.45
  -9  -2  -7   12.47    0.46
  -2  -7  -9   12.67    0.47
   7   9  -2   12.29    0.47
   7   9  -2   12.55    0.45
   9  -2   7   12.61    0.46
   9  -2   7   12.90    0.45
   9  -2   7   12.80    0.43
   9   2  -7   12.36    0.45
   9   2  -7   12.56    0.48
  -9  -2  -7   11.98    0.48
  -9   2   7   12.65    0.45
   2  -7   9   12.80    0.45
  -7   9   2   12.48    0.48
   2   7  -9   11.96    0.49
  -7  -9  -2   12.62    0.48
  -2   7   9   11.97    0.46
  -7   9   2   12.82    0.45
  -2   7   9   12.50    0.46
   2   7  -9   12.66    0.45
  -7  -9  -2   12.95    0.48
  -2  -7  -9   12.74    0.45
  -2   7   9   12.47    0.42
  -7   9   2   12.85    0.45
   7  -9  -2   12.68    0.44
  -7  -9   2   12.06    0.46
  -7   9  -2   11.72    0.48
   9  -2  -7   12.57    0.47
   9  -2  -7   12.80    0.48
   7   9   2   12.76    0.47
  -7  -9   2   12.53    0.47
   2  -7  -9   12.10    0.46
  -2   7  -9   11.54    0.48
   7   9   2   12.80    0.47
  -9   2  -7   12.28    0.46
  -2  -7   9   12.80    0.46
   9   2   7   12.83    0.45
   2   7   9   13.13    0.47
  -9   2  -7   12.56    0.47
   2  -7  -9   12.92    0.44
   9   2   7   12.83    0.47
   2  -7  -9   12.35    0.46
   9   2   7   12.74    0.45
  -9   2  -7   12.69    0.43
  -2   7  -9   12.42    0.45
   2   7   9   12.71    0.45
  -9  -2   7   12.87    0.45
   9  -2  -7   12.87    0.44
  -7  -9   2   12.42    0.46
  -7   9  -2   12.59    0.44
  -9  -2   7   12.48    0.45
  -4  -7  -9    0.42    0.07
  -9  -4  -7    0.65    0.06
  -9  -4  -7    0.56    0.09
  -4   7   9    0.49    0.07
  -7   9   4    0.41    0.06
  -9   4   7    0.45    0.06
   4   7  -9    0.49    0.06
  -4  -7  -9    0.46    0.07
   7  -9   4    0.57    0.06
   7  -9   4    0.71    0.05
  -7  -9  -4    0.46    0.07
  -4  -7  -9    0.56    0.05
  -4   7   9    0.58    0.07
   9  -4   7    0.49    0.06
   4   7  -9    0.44    0.08
  -9  -4  -7    0.52    0.07
   9  -4   7    0.50    0.04
   9   4  -7    0.48    0.06
   9   4  -7    0.62    0.09
   7   9  -4    0.47    0.07
   7   9  -4    0.55    0.07
  -9   4   7    0.54    0.06
  -7  -9  -4    0.41    0.08
  -7   9   4    0.38    0.07
  -7   9   4    0.40    0.05
   4  -7   9    0.44    0.06
   4   7  -9    0.47    0.06
   4  -7   9    0.47    0.06
  -7  -9   4    0.55    0.06
   4   7   9    0.48    0.07
   7   9   4    0.43    0.07
   7   9   4    0.50    0.07
  -4  -7   9    0.60    0.04
  -7  -9   4    0.45    0.06
  -7   9  -4    0.47    0.08
   9   4   7    0.46    0.07
   9   4   7    0.48    0.05
  -7  -9   4    0.44    0.07
  -9   4  -7    0.53    0.06
  -9  -4   7    0.49    0.05
   4  -7  -9    0.58    0.07
  -9  -4   7    0.49    0.06
  -9   4  -7    0.52    0.08
   9   4   7    0.55    0.06
   4  -7  -9    0.52    0.07
   7  -9  -4    0.39    0.06
   4   7   9    0.43    0.07
   9  -4  -7    0.49    0.07
   7  -9  -4    0.49    0.05
   9  -4  -7    0.62    0.05
   4  -7  -9    0.57    0.06
  -4  -7   9    0.57    0.07
  -4   7  -9    0.40    0.08
  -4   7  -9    0.49    0.04
   9  -4  -7    0.44    0.08
  -7   9  -4    0.56    0.05
  -7   9   6    0.88    0.08
   9  -6   7    0.92    0.06
  -9  -6  -7    0.96    0.11
   6  -7   9    0.99    0.07
   7  -9   6    0.85    0.07
   9   6  -7    0.88    0.10
   9   6  -7    0.94    0.08
  -9  -6  -7    0.98    0.06
   9   6  -7    0.89    0.07
  -6   7   9    0.87    0.08
   6  -7   9    0.80    0.08
   9  -6   7    0.75    0.08
  -7   9   6    1.09    0.09
  -6  -7  -9    1.05    0.07
  -6  -7  -9    1.05    0.10
  -6  -7  -9    0.91    0.10
   6   7  -9    0.95    0.07
  -9   6   7    0.85    0.08
   6   7  -9    0.95    0.08
   6   7  -9    0.88    0.11
  -7  -9  -6    1.14    0.11
  -9  -6  -7    0.96    0.09
   7   9  -6    0.82    0.08
  -6   7   9    0.76    0.08
   7   9  -6    0.79    0.09
  -9   6   7    1.00    0.08
   7  -9   6    0.85    0.08
  -7  -9  -6    0.88    0.09
  -6   7  -9    0.90    0.11
  -9   6  -7    1.02    0.07
   6   7   9    0.88    0.09
   9   6   7    0.85    0.10
  -9  -6   7    0.92    0.07
   6  -7  -9    0.83    0.08
   9   6   7    1.02    0.08
  -7   9  -6    0.93    0.06
  -7  -9   6    0.72    0.08
  -9  -6   7    1.09    0.09
  -6  -7   9    0.88    0.06
  -7  -9   6    0.93    0.07
   7  -9  -6    0.98    0.10
   7  -9  -6    1.01    0.06
   7  -9  -6    0.88    0.08
  -9   6  -7    0.95    0.10
  -6  -7   9    1.05    0.09
  -6   7  -9    1.03    0.06
  -7  -9   6    0.95    0.09
  -7   9  -6    0.83    0.10
   7   9   6    0.94    0.10
   7   9   6    1.20    0.10
   9  -6  -7    0.88    0.06
   9  -6  -7    0.90    0.09
   9  -6  -7    0.95    0.10
   9   6   7    0.95    0.09
   6   7   9    0.98    0.09
   6  -7  -9    0.81    0.08
   6  -7  -9    0.93    0.10
  -9  -8  -7    0.05    0.07
   8   7  -9    0.13    0.04
   7   9  -8    0.09    0.05
   9   8  -7    0.14    0.05
  -8   7   9    0.06    0.04
  -8   7   9    0.12    0.05
  -7  -9  -8    0.13    0.07
  -7  -9  -8    0.12    0.06
  -7   9   8    0.02    0.05
   9   8  -7    0.13    0.07
   7  -9   8    0.10    0.04
   7  -9   8    0.12    0.04
  -9  -8  -7    0.02    0.05
   7   9  -8    0.03    0.06
   8  -7   9    0.10    0.05
  -7   9   8    0.11    0.05
   8   7  -9    0.15    0.05
  -9   8   7    0.08    0.05
  -9   8   7    0.08    0.05
  -8  -7  -9    0.08    0.03
  -8  -7  -9    0.15    0.07
  -8  -7  -9    0.09    0.05
   9   8  -7    0.07    0.03
   8   7  -9    0.11    0.07
   9  -8   7    0.13    0.05
   9  -8   7    0.12    0.03
   8  -7   9    0.06    0.03
  -7  -9   8    0.14    0.05
  -8  -7   9    0.11    0.03
   7  -9  -8    0.08    0.02
   7  -9  -8    0.13    0.05
   7  -9  -8    0.07    0.06
  -7   9  -8    0.14    0.07
  -7   9  -8    0.13    0.03
  -8   7  -9    0.08    0.07
  -9  -8   7    0.05    0.04
   7   9   8    0.17    0.06
  -7  -9   8    0.10    0.03
  -8  -7   9    0.03    0.05
   8   7   9    0.16    0.06
   9   8   7    0.08    0.06
   9  -8  -7    0.11    0.03
   9  -8  -7    0.06    0.05
  -9   8  -7    0.08    0.04
   9   8   7    0.10    0.05
  -8   7  -9    0.11    0.04
  -9  -8   7    0.10    0.05
   9  -8  -7    0.09    0.06
   8  -7  -9    0.19    0.07
   7   9   8    0.07    0.05
   8  -7  -9    0.11    0.06
  -9   8  -7    0.08    0.07
   8   7   9    0.03    0.04
  -9   1   8    0.02    0.04
   8  -9   1    0.00    0.03
   8  -9   1    0.03    0.03
   9  -1   8    0.02    0.03
  -1  -8  -9    0.05    0.04
  -8   9   1   -0.02    0.05
  -8   9   1    0.00    0.03
  -8   9   1   -0.03    0.03
  -9  -1  -8    0.01    0.04
  -9  -1  -8    0.00    0.05
  -9  -1  -8    0.03    0.04
  -8  -9  -1   -0.03    0.05
  -1  -8  -9    0.06    0.04
   9  -1   8    0.06    0.04
   9  -1   8    0.04    0.03
   9   1  -8    0.04    0.03
   8   9  -1    0.07    0.05
   8   9  -1    0.04    0.03
   1   8  -9   -0.01    0.03
  -9   1   8   -0.03    0.03
  -8  -9  -1   -0.05    0.05
   1   8  -9    0.00    0.06
  -1   8   9    0.04    0.02
  -1  -8  -9    0.00    0.04
   1  -8   9    0.02    0.04
   9   1  -8   -0.04    0.05
  -1   8   9    0.03    0.04
  -1   8   9    0.06    0.05
   9   1   8    0.00    0.03
  -8   9  -1   -0.01    0.05
  -9  -1   8    0.03    0.04
   9  -1  -8    0.01    0.03
  -8  -9   1    0.04    0.05
   1   8   9   -0.02    0.03
   1   8   9    0.01    0.05
   8  -9  -1    0.06    0.03
   1  -8  -9    0.00    0.04
  -8   9  -1   -0.01    0.03
  -1  -8   9   -0.01    0.04
  -1   8  -9    0.00    0.03
  -8  -9   1    0.01    0.04
   9   1   8    0.00    0.04
   9   1   8   -0.03    0.03
   1  -8  -9    0.05    0.04
  -9   1  -8    0.08    0.05
  -9   1  -8    0.02    0.05
  -8  -9   1    0.01    0.05
  -9   1  -8    0.04    0.03
   8   9   1   -0.02    0.05
   8   9   1   -0.01    0.04
  -1   8  -9   -0.05    0.06
   9  -1  -8   -0.04    0.06
   9  -1  -8   -0.04    0.05
  -9  -1   8    0.01    0.03
  -3   8   9    0.67    0.04
  -9   3   8    0.51    0.06
  -9   3   8    0.64    0.06
  -8  -9  -3    0.81    0.09
  -3   8   9    0.65    0.07
   8  -9   3    0.60    0.06
   8  -9   3    0.63    0.05
   8   9  -3    0.58    0.08
  -9  -3  -8    0.63    0.06
  -3  -8  -9    0.65    0.08
   9  -3   8    0.70    0.05
   9   3  -8    0.47    0.05
   9   3  -8    0.50    0.08
   9   3  -8    0.54    0.06
  -8   9   3    0.62    0.07
  -8   9   3    0.67    0.09
  -8   9   3    0.60    0.06
   9  -3   8    0.52    0.06
   8   9  -3    0.58    0.07
  -9  -3  -8    0.59    0.09
   3  -8   9    0.50    0.06
   3   8  -9    0.54    0.06
   3   8  -9    0.51    0.09
  -3  -8  -9    0.71    0.08
  -9  -3  -8    0.82    0.08
  -3  -8  -9    0.74    0.06
  -8  -9  -3    0.58    0.09
  -3   8   9    0.80    0.08
   9  -3  -8    0.64    0.05
   9   3   8    0.78    0.07
   3  -8  -9    0.72    0.06
   3  -8  -9    0.65    0.08
   9   3   8    0.72    0.08
   9   3   8    0.66    0.06
   8   9   3    0.77    0.09
   8  -9  -3    0.67    0.06
   8  -9  -3    0.65    0.07
  -8  -9   3    0.46    0.08
  -8  -9   3    0.53    0.07
  -8   9  -3    0.60    0.08
  -9   3  -8    0.63    0.07
   3   8   9    0.73    0.07
   3  -8  -9    0.61    0.07
   8   9   3    0.75    0.08
  -8   9  -3    0.61    0.05
   9  -3  -8    0.43    0.08
   9  -3  -8    0.43    0.08
   3   8   9    0.69    0.08
  -3  -8   9    0.45    0.07
  -3   8  -9    0.67    0.07
  -3   8  -9    0.48    0.09
  -9  -3   8    0.44    0.06
  -9   3  -8    0.67    0.08
  -9  -3   8    0.53    0.06
  -8  -9   3    0.63    0.07
   9   5  -8    0.78    0.10
   9   5  -8    0.88    0.07
  -9  -5  -8    0.96    0.11
  -9   5   8    0.92    0.08
   8   9  -5    0.88    0.09
   9   5  -8    0.98    0.08
   9  -5   8    1.08    0.06
  -5  -8  -9    0.99    0.07
   9  -5   8    0.89    0.08
  -5  -8  -9    1.07    0.10
  -9   5   8    0.80    0.07
  -9  -5  -8    1.11    0.07
  -8   9   5    0.81    0.08
  -8   9   5    0.92    0.08
  -9  -5  -8    1.32    0.10
  -5   8   9    1.09    0.09
  -5   8   9    1.08    0.09
  -8  -9  -5    0.91    0.10
   5  -8   9    0.91    0.07
  -8  -9  -5    1.06    0.11
   8  -9   5    0.88    0.08
   8  -9   5    0.86    0.06
   5   8  -9    0.92    0.11
   8   9  -5    1.00    0.10
   5   8  -9    0.92    0.08
   5  -8   9    0.96    0.08
  -5  -8  -9    0.95    0.10
   9   5   8    1.11    0.08
   8  -9  -5    0.82    0.08
   8   9   5    0.81    0.09
   5  -8  -9    1.01    0.05
   5  -8  -9    0.98    0.08
   8   9   5    1.02    0.10
   9   5   8    1.07    0.09
  -8   9  -5    0.91    0.10
  -8   9  -5    0.91    0.07
   9  -5  -8    0.97    0.07
   9  -5  -8    0.86    0.09
   9  -5  -8    0.85    0.10
   9   5   8    1.17    0.10
   8  -9  -5    1.01    0.06
  -5  -8   9    0.92    0.05
  -5  -8   9    0.98    0.09
  -5   8  -9    0.89    0.11
  -5   8  -9    0.96    0.05
  -9  -5   8    0.90    0.07
  -9  -5   8    0.91    0.08
   8  -9  -5    1.02    0.10
  -9   5  -8    1.06    0.08
  -8  -9   5    0.93    0.09
  -8  -9   5    1.02    0.09
   5   8   9    1.15    0.10
   5   8   9    1.20    0.10
  -8  -9   5    1.09    0.08
  -9   5  -8    0.91    0.10
   5  -8  -9    1.11    0.09
   5  -8  -9    1.00    0.10
   7  -8   9    0.15    0.04
   7  -8   9    0.08    0.04
  -8  -9  -7    0.03    0.05
  -8  -9  -7    0.15    0.07
  -9   7   8    0.09    0.05
  -7  -8  -9    0.12    0.03
  -7  -8  -9    0.19    0.08
  -7  -8  -9    0.00    0.05
  -9   7   8    0.08    0.05
  -9  -7  -8    0.07    0.03
  -9  -7  -8    0.11    0.07
  -9  -7  -8    0.05    0.05
  -7   8   9    0.11    0.05
  -7   8   9    0.16    0.05
  -8   9   7    0.07    0.05
   9   7  -8    0.08    0.07
   9   7  -8    0.11    0.04
   8   9  -7    0.11    0.06
   9  -7   8    0.02    0.05
   7   8  -9    0.16    0.05
   7   8  -9    0.07    0.07
   7   8  -9    0.13    0.04
   8  -9   7    0.10    0.03
   8   9  -7    0.09    0.05
   9  -7   8    0.08    0.03
   9   7  -8    0.07    0.04
  -8   9   7    0.09    0.04
   8  -9   7    0.15    0.05
   7   8   9    0.03    0.06
   7   8   9    0.05    0.05
  -8  -9   7    0.12    0.04
   8   9   7    0.08    0.06
   8  -9  -7    0.13    0.06
   9  -7  -8    0.10    0.03
   9  -7  -8   -0.03    0.05
   9  -7  -8    0.13    0.07
  -8  -9   7    0.12    0.05
   8  -9  -7    0.12    0.03
   8  -9  -7    0.03    0.05
   7  -8  -9    0.04    0.06
   7  -8  -9    0.10    0.05
   9   7   8    0.09    0.06
   9   7   8    0.13    0.05
  -8   9  -7    0.15    0.08
  -8   9  -7    0.08    0.03
   8   9   7    0.13    0.06
   7  -8  -9    0.09    0.05
  -9  -7   8    0.08    0.05
  -9   7  -8    0.10    0.06
  -9   7  -8    0.15    0.04
  -7  -8   9    0.11    0.03
  -7  -8   9    0.07    0.05
  -7   8  -9    0.04    0.07
  -7   8  -9    0.11    0.03
  -9  -7   8    0.08    0.04
  -9  -9   0    0.06    0.05
  -9  -9   0    0.00    0.05
  -9  -9   0   -0.03    0.04
  -9   0  -9   -0.02    0.04
  -9   0  -9    0.05    0.05
  -9   0  -9   -0.03    0.03
  -9   0   9    0.00    0.03
  -9   0   9    0.04    0.04
  -9   9   0    0.09    0.06
  -9   9   0    0.06    0.04
  -9   9   0    0.02    0.03
   0  -9  -9   -0.03    0.04
   0  -9  -9    0.03    0.04
   0  -9  -9   -0.02    0.04
   0  -9   9    0.05    0.04
   0   9  -9    0.05    0.03
   0   9  -9    0.02    0.06
   0   9   9   -0.02    0.03
   0   9   9   -0.04    0.05
   9  -9   0    0.03    0.03
   9   0  -9    0.04    0.03
   9   0  -9   -0.03    0.06
   9   0  -9   -0.02    0.03
   9   0   9   -0.07    0.04
   9   0   9   -0.02    0.03
   9   0   9   -0.04    0.03
   9   9   0    0.07    0.05
   9   9   0   -0.01    0.03
  -9  -9  -2    4.87    0.24
  -9  -9  -2    5.19    0.25
   9  -2   9    5.88    0.23
   9  -2   9    5.63    0.21
   9   2  -9    5.53    0.21
  -9  -2  -9    5.02    0.22
  -9  -2  -9    5.48    0.26
  -9  -2  -9    5.35    0.22
   9  -9   2    5.59    0.20
   2   9  -9    5.27    0.22
   9   9  -2    5.39    0.24
   9   9  -2    5.78    0.22
  -2  -9  -9    5.15    0.21
  -9   2   9    5.18    0.22
  -9   2   9    5.10    0.22
   9   2  -9    5.16    0.25
   9   2  -9    5.46    0.22
  -9   9   2    5.35    0.25
  -9   9   2    5.10    0.22
  -9   9   2    5.06    0.21
  -2   9   9    5.50    0.24
  -2  -9  -9    5.28    0.23
  -2  -9  -9    4.77    0.23
   2   9  -9    5.53    0.26
   2  -9   9    5.34    0.22
   9  -9   2    5.16    0.22
  -2   9   9    5.62    0.20
  -2   9   9    5.31    0.23
  -9   2  -9    5.57    0.20
   2  -9  -9    5.89    0.20
   2  -9  -9    5.80    0.23
  -2   9  -9    4.89    0.26
  -2   9  -9    5.14    0.22
  -9  -2   9    5.23    0.22
  -2  -9   9    5.61    0.23
   2   9   9    5.17    0.22
   2   9   9    5.21    0.24
   9  -9  -2    5.34    0.21
   9  -9  -2    5.15    0.23
   2  -9  -9    5.50    0.23
  -9  -2   9    5.44    0.22
   9  -2  -9    5.22    0.20
   9  -2  -9    5.00    0.25
   9  -2  -9    4.89    0.25
  -9  -9   2    5.67    0.23
  -9  -9   2    5.83    0.25
  -9  -9   2    5.72    0.23
  -9   9  -2    5.12    0.25
  -9   9  -2    5.46    0.21
   9   2   9    5.16    0.23
   9   2   9    5.33    0.21
   9   2   9    4.92    0.22
  -9   2  -9    5.48    0.24
  -9   2  -9    5.43    0.23
   9   9   2    4.95    0.24
   9   9   2    5.12    0.23
  -9  -9  -4   -0.01    0.06
  -9  -9  -4   -0.08    0.05
   9  -4   9    0.02    0.03
   9   4  -9   -0.01    0.03
   9   4  -9   -0.04    0.06
  -9  -4  -9    0.00    0.03
  -9  -4  -9   -0.03    0.06
  -9  -4  -9    0.05    0.04
   4   9  -9   -0.02    0.03
   9   9  -4    0.01    0.05
   9   9  -4    0.02    0.05
   9  -4   9    0.05    0.04
  -9   4   9    0.00    0.04
  -9   4   9    0.04    0.04
   9  -9   4    0.00    0.04
   9   4  -9    0.04    0.04
  -9   9   4    0.02    0.06
  -9   9   4   -0.04    0.03
  -9   9   4    0.05    0.04
  -4  -9  -9    0.03    0.03
  -4  -9  -9   -0.01    0.05
  -4  -9  -9    0.01    0.05
   4   9  -9    0.01    0.06
   4  -9   9   -0.02    0.03
   9  -9   4   -0.03    0.02
  -4   9   9    0.04    0.02
  -4   9   9   -0.06    0.04
  -4   9   9    0.04    0.05
  -4   9  -9    0.06    0.07
   4  -9  -9   -0.07    0.05
   4  -9  -9   -0.04    0.04
  -4   9  -9    0.01    0.04
  -9  -4   9    0.02    0.03
  -4  -9   9    0.02    0.05
   4   9   9    0.00    0.05
   4   9   9   -0.04    0.05
   9  -9  -4    0.03    0.03
   9  -9  -4   -0.05    0.04
  -9   9  -4    0.00    0.06
   4  -9  -9   -0.02    0.04
   9  -4  -9    0.02    0.03
   9  -4  -9   -0.03    0.06
   9  -4  -9    0.00    0.06
  -9   4  -9    0.01    0.04
  -9  -9   4   -0.03    0.04
  -9  -9   4    0.06    0.05
  -9  -9   4   -0.04    0.04
  -9   9  -4    0.00    0.03
   9   4   9    0.05    0.06
   9   4   9    0.00    0.03
   9   4   9    0.05    0.04
  -9  -4   9   -0.06    0.04
  -9   4  -9    0.08    0.06
   9   9   4    0.00    0.06
   9   9   4   -0.03    0.04
  -9  -9  -6    4.88    0.24
  -9  -9  -6    5.24    0.23
   9  -6   9    4.14    0.20
   9  -6   9    4.40    0.18
   9   6  -9    4.40    0.20
  -9  -6  -9    4.53    0.18
  -9  -6  -9    4.85    0.24
  -9  -6  -9    4.73    0.22
   9  -9   6    4.67    0.18
   6   9  -9    4.47    0.24
   9   9  -6    4.20    0.21
   9   9  -6    4.18    0.22
  -9   6   9    4.89    0.21
  -9   6   9    4.85    0.20
   6   9  -9    4.85    0.20
   9   6  -9    4.72    0.24
  -9   9   6    4.41    0.20
  -9   9   6    4.77    0.21
  -6  -9  -9    4.81    0.17
  -6  -9  -9    4.88    0.22
   6  -9   9    4.96    0.19
   9  -9   6    5.18    0.21
   6  -9   9    4.85    0.21
   9   6  -9    4.77    0.19
  -6   9   9    3.90    0.20
  -6   9   9    4.28    0.21
   6  -9  -9    4.25    0.17
  -6   9  -9    4.89    0.17
   6  -9  -9    4.43    0.22
   6  -9  -9    4.34    0.21
  -6   9  -9    4.53    0.24
  -6  -9   9    4.70    0.17
  -9   9  -6    4.70    0.24
  -9  -6   9    4.70    0.21
   6   9   9    4.97    0.22
   6  -9  -9    4.01    0.20
   9  -9  -6    4.64    0.18
   9  -9  -6    4.40    0.21
   9  -9  -6    4.52    0.23
  -6  -9   9    4.56    0.21
  -9  -6   9    4.49    0.19
   9  -6  -9    4.81    0.17
   9  -6  -9    4.84    0.22
   9  -6  -9    4.97    0.24
  -9  -9   6    4.34    0.19
  -9  -9   6    4.17    0.21
  -9  -9   6    4.20    0.21
  -9   9  -6    4.70    0.19
   6   9   9    4.75    0.22
   9   6   9    4.57    0.22
   9   6   9    4.62    0.19
   9   6   9    4.45    0.21
  -9   6  -9    4.11    0.23
  -9   6  -9    4.23    0.19
   9   9   6    4.90    0.23
   9   9   6    4.64    0.22
  -9  -9  -8    0.05    0.07
  -9  -9  -8    0.00    0.05
   8  -9   9    0.05    0.05
   9   9  -8    0.04    0.05
  -9  -8  -9   -0.08    0.07
  -9  -8  -9   -0.05    0.05
  -8  -9  -9    0.15    0.06
   9  -8   9   -0.01    0.04
   9  -8   9    0.01    0.03
   9   8  -9    0.02    0.04
  -9   8   9    0.01    0.05
  -9   8   9   -0.07    0.04
   9  -9   8    0.01    0.03
   8  -9   9    0.04    0.04
  -9   9   8    0.02    0.05
  -9   9   8    0.06    0.05
  -8  -9  -9    0.01    0.07
   8   9  -9    0.02    0.05
   9   8  -9    0.04    0.07
   9   9  -8   -0.01    0.06
   9  -9   8    0.07    0.05
   8   9  -9    0.06    0.07
  -8   9   9    0.03    0.04
  -8   9   9    0.02    0.05
  -8   9  -9   -0.04    0.06
  -9   9  -8    0.07    0.03
  -9  -9   8    0.03    0.03
  -8  -9   9    0.06    0.05
  -9  -8   9    0.05    0.03
  -8   9  -9   -0.03    0.03
   8   9   9   -0.01    0.06
   8   9   9    0.00    0.05
   9  -9  -8    0.01    0.03
   8  -9  -9   -0.01    0.06
   9  -9  -8   -0.02    0.06
   8  -9  -9   -0.01    0.05
  -9   9  -8    0.01    0.07
   9  -8  -9    0.10    0.06
   9  -8  -9   -0.05    0.06
  -9  -8   9   -0.15    0.04
  -9   8  -9    0.06    0.07
  -9   8  -9    0.00    0.03
  -8  -9   9   -0.03    0.03
   9   8   9    0.06    0.06
   9   8   9    0.02    0.05
  -9  -9   8   -0.02    0.05
   9  -9  -8    0.01    0.06
   9   9   8   -0.03    0.06
   9   9   8    0.06    0.06
 -10   0   0    0.05    0.04
 -10   0   0    0.01    0.03
 -10   0   0   -0.01    0.02
   0 -10   0    0.02    0.03
   0 -10   0   -0.01    0.04
   0   0 -10   -0.02    0.05
   0   0 -10    0.00    0.05
   0   0 -10    0.00    0.03
   0   0  10    0.01    0.02
   0   0  10    0.01    0.03
   0  10   0   -0.03    0.03
   0  10   0   -0.01    0.03
   0  10   0    0.01    0.04
  10   0   0    0.00    0.04
  10   0   0    0.03    0.04
  10   2   0    0.67    0.07
  10   2   0    0.77    0.07
   0 -10   2    0.61    0.05
   0 -10   2    0.61    0.07
   0 -10   2    0.60    0.07
   0  10  -2    0.56    0.06
   0  10  -2    0.62    0.07
   0  10   2    0.82    0.07
   0  10   2    0.88    0.07
   0  10   2    1.01    0.09
   2   0 -10    0.50    0.08
   2   0 -10    0.59    0.07
   2   0  10    0.83    0.06
   2   0  10    0.68    0.06
  10  -2   0    0.79    0.07
  10  -2   0    0.59    0.07
  10   2   0    0.78    0.08
  -2   0 -10    0.74    0.08
  -2   0 -10    0.95    0.09
  -2   0 -10    0.77    0.07
  -2   0  10    0.66    0.04
  -2   0  10    0.65    0.06
  -2   0  10    0.57    0.06
   0 -10  -2    0.83    0.05
   0 -10  -2    0.73    0.06
 -10   2   0    0.62    0.07
 -10  -2   0    0.63    0.07
 -10  -2   0    0.66    0.06
 -10  -2   0    0.79    0.05
 -10   2   0    0.69    0.07
  10  -4   0    0.07    0.03
  -4   0 -10    0.08    0.05
  -4   0 -10    0.20    0.05
  -4   0  10    0.07    0.03
  -4   0  10    0.11    0.04
   0 -10  -4    0.13    0.04
   0 -10  -4    0.05    0.03
   0 -10  -4    0.12    0.04
  10   4   0    0.12    0.05
  10   4   0    0.13    0.04
   0  10  -4    0.09    0.04
   0  10  -4    0.04    0.05
   0  10   4    0.07    0.03
   4   0  10    0.12    0.04
 -10  -4   0    0.05    0.04
 -10  -4   0    0.09    0.04
 -10  -4   0    0.12    0.03
 -10   4   0    0.12    0.05
 -10   4   0    0.10    0.04
   0 -10   4    0.08    0.03
   0 -10   4    0.05    0.04
   0  10   4    0.10    0.05
   4   0 -10    0.11    0.02
   4   0 -10    0.09    0.06
   4   0 -10    0.04    0.04
   4   0  10    0.14    0.03
  10   4   0    0.13    0.05
   0 -10   4    0.08    0.04
  10  -4   0    0.04    0.04
   6   0 -10    2.33    0.13
   6   0 -10    2.36    0.15
   6   0  10    2.38    0.12
  10  -6   0    2.45    0.12
 -10  -6   0    2.36    0.14
 -10  -6   0    2.25    0.14
 -10  -6   0    2.58    0.13
 -10   6   0    2.30    0.15
 -10   6   0    2.37    0.12
   6   0  10    2.36    0.12
   0  10  -6    2.30    0.15
   0  10   6    2.33    0.14
   6   0 -10    2.38    0.09
   0 -10   6    2.29    0.12
   0 -10   6    2.29    0.12
   0  10  -6    2.23    0.12
  -6   0 -10    2.66    0.14
  10  -6   0    2.41    0.13
  10   6   0    2.32    0.15
  10   6   0    2.39    0.11
  -6   0 -10    2.12    0.14
  -6   0  10    2.43    0.12
  -6   0  10    2.34    0.12
   0 -10  -6    2.51    0.12
   0 -10  -6    2.32    0.12
   0 -10  -6    2.35    0.13
   0  10   6    2.46    0.11
   0  10  -8   -0.04    0.03
   0  10  -8    0.05    0.06
 -10   8   0    0.00    0.05
   0 -10   8   -0.01    0.04
   8   0 -10    0.02    0.02
   8   0 -10    0.10    0.07
   8   0 -10   -0.03    0.04
   8   0  10   -0.02    0.04
   8   0  10   -0.01    0.03
 -10   8   0    0.03    0.04
  -8   0 -10   -0.03    0.04
  -8   0 -10   -0.04    0.05
  -8   0 -10    0.00    0.03
  -8   0  10    0.04    0.03
  -8   0  10   -0.03    0.04
   0 -10   8    0.00    0.03
 -10  -8   0    0.04    0.05
 -10  -8   0   -0.05    0.05
 -10  -8   0    0.02    0.04
   0 -10  -8   -0.01    0.04
   0 -10  -8   -0.01    0.04
   0  10   8    0.04    0.05
  10  -8   0    0.03    0.04
  10  -8   0    0.06    0.04
  10   8   0   -0.03    0.05
  10   8   0   -0.01    0.03
   0  10   8    0.02    0.03
   0 -10  -8    0.02    0.02
   0 -10  -8   -0.01    0.04
   1  10  -1   16.99    0.59
 -10  -1  -1   16.29    0.59
 -10  -1  -1   16.20    0.59
 -10  -1  -1   16.69    0.57
  -1 -10  -1   16.72    0.57
   1  10  -1   17.59    0.59
   1  10  -1   17.07    0.60
  -1  10   1   17.08    0.58
   1  -1  10   17.61    0.59
   1   1 -10   16.30    0.61
   1 -10   1   15.74    0.59
 -10   1   1   16.25    0.59
  -1   1  10   17.52    0.56
  -1  -1 -10   16.02    0.60
  -1  -1 -10   16.06    0.61
  -1  -1 -10   16.49    0.58
  10   1  -1   17.43    0.60
   1   1 -10   16.11    0.60
 -10   1   1   16.50    0.56
  10  -1   1   17.35    0.59
  10  -1   1   17.59    0.60
   1  -1  10   16.90    0.57
  -1 -10  -1   15.65    0.60
 -10   1   1   16.64    0.60
  -1  10   1   17.27    0.58
  -1  10   1   16.83    0.60
  -1   1  10   17.03    0.58
  -1   1  10   17.21    0.59
  10   1  -1   17.08    0.60
  -1  10   1   18.22    0.59
  -1 -10  -1   16.44    0.58
  10   1  -1   16.88    0.60
  -1   1 -10   16.86    0.61
   1  -1 -10   16.89    0.60
  -1  -1  10   15.78    0.57
  -1  -1  10   16.71    0.59
  10   1   1   16.38    0.60
   1  -1 -10   16.95    0.61
  -1 -10   1   17.59    0.58
  -1  10  -1   16.70    0.59
 -10  -1   1   17.41    0.57
   1  10   1   16.02    0.59
   1   1  10   16.93    0.57
   1  10   1   16.40    0.60
  -1 -10   1   16.51    0.60
  10  -1  -1   16.13    0.60
  -1  -1  10   16.25    0.57
   1  10   1   17.10    0.58
 -10  -1   1   16.76    0.59
  10  -1  -1   16.30    0.59
  -1  10  -1   16.24    0.58
 -10   1  -1   16.80    0.60
 -10   1  -1   17.00    0.59
  -1  10  -1   15.36    0.59
   1   1  10   16.19    0.59
  -1   1 -10   17.31    0.61
  -1   1 -10   17.06    0.58
  10   1   1   16.27    0.60
   3   1 -10    0.08    0.06
   3   1 -10    0.03    0.02
   3  -1  10    0.06    0.03
   1 -10   3    0.10    0.04
   1 -10   3    0.01    0.03
 -10   3   1    0.04    0.04
  -3  -1 -10    0.09    0.05
   1  10  -3    0.03    0.04
 -10  -3  -1    0.06    0.04
  -1  10   3    0.04    0.03
  10  -3   1    0.02    0.04
  -3   1  10    0.01    0.03
   3  -1  10    0.04    0.03
  10   3  -1    0.08    0.04
  10  -3   1    0.10    0.04
  10   3  -1    0.06    0.05
  -1  10   3    0.13    0.04
  -1  10   3    0.03    0.03
  -1  10   3    0.09    0.05
   1  10  -3    0.09    0.04
   1 -10   3    0.04    0.02
 -10  -3  -1    0.03    0.04
 -10  -3  -1    0.07    0.03
  -3  -1 -10    0.06    0.06
  -3   1  10    0.02    0.03
   3   1 -10    0.01    0.04
  10   3  -1    0.04    0.05
  -3  -1 -10    0.00    0.04
  -1 -10  -3    0.05    0.03
  -1 -10  -3    0.03    0.03
 -10   3   1    0.08    0.04
   3   1  10    0.05    0.03
  10  -3  -1    0.12    0.04
  -1  10  -3    0.03    0.04
  10   3   1    0.05    0.05
   3   1  10    0.06    0.04
  -3  -1  10    0.01    0.04
   1 -10  -3    0.06    0.03
   1  10   3    0.07    0.03
   1  10   3    0.10    0.03
   3  -1 -10    0.09    0.04
  -3  -1  10    0.00    0.03
  -3   1 -10    0.03    0.05
  -1 -10   3    0.01    0.03
  -1 -10   3    0.03    0.04
  -1 -10   3    0.08    0.04
  10  -3  -1    0.02    0.04
   1  10   3    0.07    0.05
  10   3   1    0.06    0.03
 -10  -3   1    0.01    0.03
   3  -1 -10    0.03    0.06
  -1  10  -3    0.02    0.03
  -3   1 -10    0.07    0.04
  10   3   1    0.03    0.05
 -10   3  -1    0.04    0.04
 -10  -3   1    0.08    0.04
 -10  -3   1    0.04    0.04
 -10   3  -1    0.01    0.03
   1 -10   5    0.00    0.04
 -10  -5  -1    0.04    0.05
  -5  -1 -10   -0.08    0.04
  -1  10   5    0.02    0.03
  10  -5   1    0.05    0.04
 -10  -5  -1   -0.02    0.03
   5   1 -10    0.03    0.04
   5   1 -10    0.10    0.06
   1 -10   5    0.04    0.03
   1  10  -5   -0.03    0.05
  10   5  -1    0.01    0.04
  -1  10   5   -0.01    0.03
 -10  -5  -1    0.02    0.05
  -1  10   5    0.03    0.05
   5  -1  10    0.02    0.03
   5  -1  10    0.05    0.03
   5   1 -10    0.00    0.02
  -5   1  10    0.03    0.03
  -5   1  10   -0.02    0.04
  -1 -10  -5    0.01    0.03
  -5  -1 -10   -0.01    0.04
   1  10  -5    0.04    0.03
  10   5  -1    0.05    0.05
  -1 -10  -5    0.01    0.03
 -10   5   1   -0.01    0.03
  -1 -10  -5    0.02    0.03
 -10   5   1    0.06    0.05
   1 -10   5   -0.01    0.02
  10  -5   1    0.09    0.04
 -10  -5   1    0.05    0.04
   1  10   5    0.02    0.03
  -1  10  -5    0.12    0.05
 -10  -5   1    0.00    0.04
 -10   5  -1    0.00    0.03
 -10  -5   1    0.01    0.03
 -10   5  -1    0.05    0.05
  -1 -10   5    0.01    0.04
   5  -1 -10   -0.02    0.03
  -5   1 -10   -0.05    0.04
   1 -10  -5    0.03    0.03
   5  -1 -10    0.06    0.06
  -1 -10   5    0.06    0.02
  10   5   1    0.04    0.05
  10   5   1   -0.10    0.04
  10   5   1   -0.02    0.03
   5   1  10    0.01    0.03
  10  -5  -1    0.05    0.03
  10  -5  -1    0.01    0.04
  -1 -10   5    0.04    0.04
  -5  -1  10    0.01    0.03
  -5  -1  10    0.05    0.04
  -5   1 -10   -0.03    0.04
   1 -10  -5    0.04    0.03
   1  10   5   -0.01    0.04
   5   1  10    0.06    0.04
  -1  10  -5    0.00    0.03
   1  10  -7   23.92    0.90
 -10  -7  -1   25.97    0.88
 -10  -7  -1   26.44    0.90
  -1 -10  -7   26.35    0.86
  10  -7   1   24.17    0.87
   1  10  -7   25.01    0.88
  -1 -10  -7   25.66    0.88
  -7  -1 -10   25.49    0.88
 -10  -7  -1   25.54    0.90
 -10   7   1   25.02    0.90
   7  -1  10   25.25    0.87
  -1  10   7   25.36    0.88
  -1  10   7   24.26    0.89
  -7   1  10   25.48    0.87
   7   1 -10   25.57    0.88
 -10   7   1   25.68    0.87
   1 -10   7   25.72    0.86
  -7  -1 -10   25.72    0.90
 -10   7   1   26.07    0.85
  10   7  -1   24.53    0.89
  10   7  -1   25.81    0.87
   1 -10   7   25.50    0.88
  -7   1  10   25.23    0.87
  10  -7   1   24.99    0.88
   7  -1  10   25.81    0.87
   7   1 -10   25.41    0.85
   7   1 -10   24.53    0.90
  -1  10   7   25.04    0.86
  -1 -10  -7   25.81    0.88
   7  -1 -10   24.40    0.90
   7  -1 -10   24.65    0.88
   1 -10  -7   25.92    0.87
 -10  -7   1   25.37    0.89
  -7  -1  10   25.54    0.88
  10  -7  -1   25.76    0.89
 -10  -7   1   24.40    0.89
 -10  -7   1   25.13    0.88
  10  -7  -1   24.95    0.87
  10   7   1   25.72    0.90
   1 -10  -7   26.28    0.86
   7  -1 -10   25.19    0.84
  -7   1 -10   25.55    0.86
  -7  -1  10   25.30    0.87
 -10   7  -1   25.18    0.90
  -7   1 -10   24.81    0.89
   7   1  10   25.94    0.88
   7   1  10   26.24    0.87
   1 -10  -7   25.30    0.88
  -1 -10   7   24.43    0.87
  -1 -10   7   24.34    0.88
  -1  10  -7   25.29    0.88
  -1  10  -7   24.15    0.90
  10   7   1   26.07    0.86
   1  10   7   25.50    0.89
  -7   1 -10   24.40    0.89
 -10   7  -1   25.03    0.87
   1  10   7   25.60    0.87
  -9   1  10    2.95    0.15
  -1  10   9    3.36    0.13
 -10   9   1    3.01    0.15
  -1 -10  -9    2.93    0.16
  -1  10   9    3.10    0.17
 -10   9   1    3.17    0.13
  -9  -1 -10    3.19    0.16
  -9  -1 -10    2.98    0.18
 -10  -9  -1    3.09    0.18
   9   1 -10    3.09    0.13
 -10  -9  -1    3.14    0.18
  -1 -10  -9    3.02    0.15
  -9   1  10    3.10    0.15
  10  -9   1    3.24    0.13
  -1 -10  -9    3.13    0.16
   1  10  -9    3.35    0.16
  10   9  -1    3.19    0.18
  10   9  -1    3.22    0.14
   9  -1  10    3.23    0.16
   9  -1  10    3.21    0.14
   9   1 -10    3.34    0.16
 -10   9   1    3.07    0.19
   1 -10   9    2.85    0.15
  10  -9   1    3.28    0.15
   9   1 -10    3.24    0.19
   1  10  -9    2.86    0.19
  -9  -1 -10    3.10    0.15
  -9  -1  10    3.20    0.15
  -1 -10   9    3.28    0.16
  -9   1 -10    3.40    0.17
 -10   9  -1    3.26    0.15
  10  -9  -1    2.92    0.15
 -10  -9   1    3.25    0.17
  10   9   1    2.89    0.18
  -9  -1  10    3.17    0.16
 -10   9  -1    3.32    0.19
   1 -10  -9    3.27    0.13
   1 -10  -9    3.19    0.16
 -10  -9   1    3.20    0.18
   9   1  10    3.24    0.16
   9   1  10    3.16    0.14
   9   1  10    3.26    0.15
  10  -9  -1    2.77    0.16
  -9   1 -10    3.49    0.18
  -9   1 -10    3.21    0.14
   1  10   9    3.02    0.17
  -1  10  -9    2.85    0.19
  -1  10  -9    3.11    0.16
   1 -10  -9    3.25    0.16
   1 -10  -9    3.46    0.16
   9  -1 -10    3.18    0.16
 -10  -9   1    3.40    0.17
   9  -1 -10    3.13    0.13
   9  -1 -10    3.03    0.19
   1  10   9    3.02    0.14
  -2 -10   0    0.80    0.07
   2  10   0    0.68    0.06
   0  -2 -10    0.66    0.08
   2  10   0    0.87    0.06
  -2 -10   0    0.73    0.05
  10   0   2    0.83    0.07
   0   2 -10    0.52    0.08
 -10   0  -2    0.94    0.08
 -10   0   2    0.58    0.05
   0   2  10    0.66    0.05
   0   2  10    0.78    0.07
  10   0  -2    0.77    0.07
  -2 -10   0    0.66    0.07
  -2  10   0    0.68    0.06
   0  -2 -10    0.68    0.06
 -10   0   2    0.60    0.06
  -2  10   0    0.72    0.06
   0  -2  10    0.57    0.05
   0  -2  10    0.57    0.06
  10   0  -2    0.72    0.07
  10   0   2    0.81    0.07
   0   2 -10    0.68    0.05
  10   0  -2    0.57    0.07
  -2  10   0    0.78    0.07
   2  10   0    0.78    0.08
  -2  10   0    0.79    0.07
 -10   0  -2    0.84    0.07
 -10   0  -2    0.86    0.04
   0   2 -10    0.54    0.08
   0  -2 -10    0.77    0.08
 -10  -2  -2    0.08    0.04
  -2  -2 -10   -0.03    0.04
   2 -10   2   -0.02    0.03
  10   2  -2    0.07    0.04
  -2   2  10    0.02    0.03
  -2  10   2   -0.01    0.03
  -2 -10  -2   -0.02    0.03
  -2  10   2    0.05    0.03
   2  10  -2    0.07    0.04
  10  -2   2    0.05    0.04
   2  10  -2    0.02    0.03
  -2  -2 -10    0.06    0.05
   2  -2  10    0.01    0.03
 -10   2   2    0.02    0.03
 -10   2   2    0.04    0.02
  -2 -10  -2    0.05    0.02
 -10  -2  -2    0.03    0.04
  -2 -10  -2   -0.01    0.04
   2  -2  10    0.04    0.03
   2   2 -10    0.01    0.02
  10   2  -2    0.15    0.05
  -2  10   2   -0.01    0.04
   2 -10   2    0.03    0.04
 -10  -2  -2    0.03    0.03
  10   2  -2    0.11    0.05
  -2   2  10    0.08    0.04
  -2  10   2    0.04    0.04
  -2  -2 -10   -0.05    0.03
   2   2 -10    0.11    0.06
   2   2 -10    0.00    0.04
  10  -2   2    0.07    0.04
  10   2   2   -0.05    0.04
  -2  10  -2    0.03    0.02
  10  -2  -2    0.07    0.04
  10  -2  -2    0.02    0.04
   2  -2 -10   -0.01    0.04
  -2  -2  10    0.07    0.04
  -2   2 -10    0.07    0.05
   2   2  10    0.06    0.04
 -10   2  -2    0.00    0.04
 -10  -2   2    0.04    0.02
   2  10   2    0.01    0.03
   2  -2 -10    0.09    0.06
 -10   2  -2    0.02    0.04
  -2   2 -10    0.01    0.04
  -2  10  -2    0.06    0.04
  10   2   2    0.05    0.05
   2   2  10    0.01    0.03
   2  10   2    0.03    0.04
  10  -2  -2   -0.01    0.04
 -10  -2   2    0.04    0.03
  -2 -10   2    0.01    0.04
   2  10   2    0.01    0.02
  -2 -10   2   -0.01    0.03
  -2 -10   2    0.06    0.04
  -2  10  -2    0.01    0.03
  -2  -2  10    0.02    0.02
 -10  -4  -2   13.85    0.51
   2  10  -4   14.35    0.51
 -10   4   2   13.64    0.52
  -2  10   4   13.60    0.49
  10   4  -2   13.92    0.50
  10  -4   2   13.50    0.50
  10  -4   2   13.92    0.50
  10   4  -2   14.15    0.51
  10   4  -2   14.05    0.52
  -2  10   4   14.07    0.50
 -10   4   2   14.26    0.50
  -2  10   4   14.19    0.50
 -10   4   2   14.18    0.47
  -4   2  10   14.03    0.49
   4   2 -10   14.12    0.50
  -2 -10  -4   14.06    0.48
  -2 -10  -4   13.43    0.50
   2 -10   4   14.39    0.49
   2 -10   4   13.47    0.50
   2  10  -4   13.87    0.50
   4  -2  10   13.91    0.49
   4   2 -10   14.43    0.48
  -2 -10  -4   13.69    0.49
  -4  -2 -10   13.47    0.51
  -4   2  10   14.22    0.50
  -4  -2 -10   13.95    0.51
   4  -2  10   13.79    0.49
  -2  10   4   13.89    0.51
   4   2 -10   13.66    0.53
  -4  -2 -10   15.39    0.53
  -2 -10   4   13.78    0.50
  10  -4  -2   13.55    0.51
  -4   2 -10   13.18    0.50
 -10  -4   2   14.12    0.49
  10   4   2   13.46    0.49
  -4  -2  10   14.02    0.48
 -10   4  -2   13.66    0.52
  10   4   2   13.37    0.51
 -10  -4   2   13.48    0.50
   2  10   4   13.53    0.50
   4  -2 -10   14.29    0.52
  -2 -10   4   13.99    0.50
  -2  10  -4   14.09    0.50
  -2  10  -4   13.73    0.51
  -2  10  -4   14.24    0.47
 -10  -4   2   13.21    0.50
  10  -4  -2   13.85    0.49
   4   2  10   13.67    0.50
 -10   4  -2   14.16    0.50
   4  -2 -10   14.02    0.51
  -2 -10   4   14.03    0.48
  -4  -2  10   14.34    0.50
  -4   2 -10   13.64    0.52
  10   4   2   13.95    0.51
   2  10   4   14.14    0.52
   4   2  10   13.75    0.49
  10   4   2   14.24    0.49
 -10   6   2    0.09    0.03
   6  -2  10    0.14    0.04
   6  -2  10    0.11    0.04
   6   2 -10    0.07    0.02
   2 -10   6    0.02    0.03
  10  -6   2    0.11    0.04
  -6   2  10    0.06    0.04
   2  10  -6    0.10    0.04
  -6   2  10    0.05    0.04
  10  -6   2    0.07    0.04
  -2  10   6    0.09    0.04
  -2  10   6    0.18    0.05
  -6  -2 -10    0.21    0.07
  -2  10   6    0.15    0.03
  -2 -10  -6    0.12    0.03
   2  10  -6   -0.01    0.05
  10   6  -2    0.02    0.04
 -10   6   2    0.14    0.06
 -10   6   2    0.04    0.03
   6   2 -10    0.07    0.04
  -2 -10  -6    0.09    0.04
  -2 -10  -6    0.06    0.04
  10   6  -2    0.15    0.06
   2 -10   6    0.09    0.03
  -6  -2 -10    0.08    0.04
 -10  -6  -2    0.11    0.05
 -10  -6  -2    0.12    0.06
   6   2 -10    0.05    0.06
  -6   2 -10    0.08    0.05
  -2 -10   6    0.05    0.04
  -6   2 -10    0.19    0.06
   2 -10  -6    0.13    0.04
 -10  -6   2    0.01    0.04
   6   2  10    0.13    0.03
   6   2  10    0.07    0.04
  -2 -10   6    0.08    0.04
  10  -6  -2    0.04    0.04
 -10   6  -2    0.01    0.05
   6  -2 -10    0.09    0.06
  -6  -2  10    0.01    0.04
 -10  -6   2    0.01    0.04
 -10  -6   2    0.10    0.04
  10   6   2    0.05    0.05
   2 -10  -6    0.13    0.04
  -6  -2  10    0.05    0.03
  -2  10  -6   -0.01    0.03
  10  -6  -2    0.02    0.03
 -10   6  -2    0.02    0.03
   6   2  10    0.18    0.05
  10   6   2    0.10    0.03
   2  10   6    0.12    0.05
   2  10   6    0.15    0.04
   6  -2 -10    0.05    0.04
  -2  10  -6    0.10    0.06
  10   6   2    0.09    0.04
  -8  -2 -10    0.50    0.08
  -2 -10  -8    0.56    0.07
   2 -10   8    0.44    0.04
   2 -10   8    0.51    0.06
  -8   2  10    0.45    0.06
  -8   2  10    0.56    0.06
  10   8  -2    0.32    0.07
 -10  -8  -2    0.42    0.08
  -2  10   8    0.50    0.04
   8   2 -10    0.46    0.09
   8   2 -10    0.52    0.06
 -10   8   2    0.50    0.06
 -10   8   2    0.48    0.05
  -8  -2 -10    0.48    0.07
   8  -2  10    0.50    0.06
  10  -8   2    0.62    0.06
  10  -8   2    0.54    0.04
   2  10  -8    0.49    0.06
   2  10  -8    0.52    0.09
   8  -2  10    0.40    0.05
   8   2 -10    0.50    0.05
  -2 -10  -8    0.53    0.06
  -2  10   8    0.46    0.07
  10   8  -2    0.44    0.06
 -10  -8  -2    0.50    0.08
  -2 -10  -8    0.49    0.07
  -8  -2 -10    0.54    0.06
 -10   8   2    0.52    0.09
  -2  10   8    0.40    0.07
 -10  -8   2    0.35    0.07
   8  -2 -10    0.46    0.09
 -10  -8   2    0.42    0.06
  -2  10  -8    0.36    0.08
   2  10   8    0.51    0.06
   2  10   8    0.58    0.08
   8  -2 -10    0.59    0.04
  -8  -2  10    0.38    0.05
   2 -10  -8    0.53    0.05
  -8   2 -10    0.50    0.08
  -8   2 -10    0.39    0.04
  10   8   2    0.50    0.08
 -10  -8   2    0.56    0.07
   8   2  10    0.57    0.05
   8   2  10    0.51    0.07
  10   8   2    0.54    0.07
  -2 -10   8    0.58    0.06
  -2 -10   8    0.57    0.07
   8  -2 -10    0.46    0.07
 -10   8  -2    0.50    0.06
   2 -10  -8    0.43    0.06
   8   2  10    0.65    0.07
  10  -8  -2    0.59    0.06
  10  -8  -2    0.35    0.06
 -10   8  -2    0.57    0.09
   2 -10  -8    0.44    0.06
  -2  10  -8    0.40    0.06
  -8  -2  10    0.44    0.06
  -8   2 -10    0.38    0.07
 -10  -1  -3    0.08    0.04
  -3 -10  -1    0.07    0.02
   1   3 -10    0.02    0.05
   3  10  -1    0.03    0.03
  10   1  -3    0.04    0.05
 -10   1   3    0.02    0.03
 -10   1   3    0.04    0.02
  10   1  -3    0.07    0.04
  -3  10   1    0.06    0.04
   1  -3  10    0.04    0.03
   3  10  -1    0.07    0.04
  -1  -3 -10    0.09    0.05
   1   3 -10    0.02    0.02
  -3  10   1    0.06    0.03
  -3 -10  -1    0.05    0.04
  -1   3  10    0.03    0.02
  -3  10   1    0.06    0.04
  -1  -3 -10    0.05    0.05
  -1   3  10    0.05    0.04
  -1  -3 -10    0.06    0.04
 -10  -1  -3    0.06    0.04
  -3 -10  -1    0.07    0.05
   1   3 -10    0.06    0.06
  -3  10   1    0.07    0.03
 -10  -1  -3    0.10    0.05
  10  -1   3    0.08    0.04
  10  -1   3    0.05    0.04
  10   1  -3    0.04    0.04
   1  -3  10    0.07    0.04
   1   3 -10    0.08    0.03
  -1   3  10    0.06    0.03
 -10  -1   3    0.05    0.04
  10   1   3    0.06    0.05
   1   3  10    0.05    0.03
  10   1   3    0.08    0.03
  -1   3 -10    0.04    0.03
  10  -1  -3    0.02    0.05
  10  -1  -3    0.01    0.04
  -3  10  -1    0.01    0.04
   3  10   1    0.03    0.05
  -1  -3  10    0.09    0.04
  10  -1  -3    0.03    0.04
  -3  10  -1    0.07    0.03
 -10   1  -3    0.04    0.04
  -3 -10   1    0.04    0.04
 -10  -1   3    0.04    0.02
  -1   3 -10    0.07    0.06
  -3  10  -1    0.07    0.04
   3  10   1   -0.01    0.04
   1  -3 -10    0.03    0.05
   1  -3 -10    0.09    0.05
  10   1   3    0.01    0.04
 -10   1  -3    0.04    0.04
  -3  10  -1   -0.01    0.02
   3  10   1    0.01    0.03
   1   3  10    0.05    0.04
  -3 -10   1    0.02    0.05
  10   3  -3    8.98    0.36
   3  -3  10    9.24    0.33
   3   3 -10    8.84    0.37
   3   3 -10    8.85    0.34
  -3   3  10    8.47    0.33
  -3  -3 -10    8.70    0.34
  -3  10   3    8.96    0.33
  10   3  -3    9.00    0.35
  10   3  -3    9.40    0.34
  -3 -10  -3    9.13    0.32
  -3 -10  -3    8.49    0.34
  -3 -10  -3    8.56    0.35
   3   3 -10    9.27    0.32
   3 -10   3    8.85    0.33
   3 -10   3    8.68    0.33
  10  -3   3    9.07    0.34
  -3  -3 -10    8.78    0.36
  -3  -3 -10    8.78    0.34
   3  10  -3    9.26    0.34
   3  10  -3    9.45    0.34
  -3  10   3    9.08    0.32
  10  -3   3    8.65    0.33
  -3   3  10    9.05    0.33
   3  -3  10    9.15    0.33
  -3  10   3    8.71    0.34
  -3 -10  -3    9.06    0.31
  -3  10   3    9.13    0.34
 -10  -3  -3    9.06    0.34
 -10   3   3    9.12    0.31
 -10  -3  -3    8.85    0.35
 -10   3   3    9.33    0.34
 -10  -3  -3    8.92    0.33
  -3   3 -10    8.87    0.33
  -3   3 -10    8.77    0.36
  10   3   3    8.72    0.34
  10   3   3    8.65    0.32
 -10   3  -3    8.99    0.34
  -3 -10   3    9.26    0.35
  -3 -10   3    9.07    0.34
   3  -3 -10    8.72    0.35
  -3  10  -3    9.03    0.31
   3   3  10    8.59    0.32
  -3  10  -3    8.59    0.33
  -3  10  -3    8.65    0.35
 -10  -3   3    8.82    0.34
  10  -3  -3    8.92    0.35
   3  -3 -10    8.90    0.34
 -10   3  -3    8.59    0.35
  -3 -10   3    9.18    0.33
  -3  -3  10    9.28    0.32
  -3  -3  10    9.38    0.34
   3   3  10    8.86    0.34
   3  10   3    8.53    0.34
   3  10   3    8.45    0.35
  10  -3  -3    8.88    0.33
  10  -3  -3    9.01    0.35
 -10  -3   3    9.16    0.32
  10   3   3    8.99    0.35
   5   3 -10   12.13    0.48
 -10   5   3   12.78    0.43
 -10   5   3   12.97    0.48
 -10   5   3   12.76    0.45
   3  10  -5   12.13    0.46
   3  10  -5   12.71    0.47
  10  -5   3   12.11    0.45
   5   3 -10   13.01    0.46
  -5  -3 -10   12.56    0.46
 -10  -5  -3   11.63    0.46
   5  -3  10   12.73    0.44
   5  -3  10   12.40    0.45
   5   3 -10   12.56    0.44
   3 -10   5   12.38    0.44
  -5  -3 -10   12.49    0.47
   3 -10   5   12.84    0.45
  -3  10   5   12.27    0.45
  -3  10   5   12.33    0.46
  -3 -10  -5   12.29    0.45
  -5   3  10   12.33    0.45
  -5   3  10   11.95    0.45
  -3 -10  -5   13.12    0.43
 -10  -5  -3   12.94    0.48
  -3 -10  -5   12.53    0.46
  -3  10   5   12.43    0.44
  10  -5   3   12.24    0.46
  10   5  -3   12.94    0.46
  10   5  -3   12.10    0.47
  -5   3 -10   12.53    0.48
   5  -3 -10   12.35    0.46
 -10  -5   3   12.12    0.46
   5   3  10   12.58    0.45
  10   5   3   12.54    0.45
  -3  10  -5   12.93    0.45
  10  -5  -3   12.44    0.47
  -3 -10   5   12.42    0.43
  -3  10  -5   12.40    0.48
   3  10   5   12.28    0.47
  10   5   3   12.64    0.47
 -10   5  -3   12.40    0.45
  -5  -3  10   12.64    0.44
  -5  -3  10   12.27    0.45
   5   3  10   12.58    0.45
  10  -5  -3   12.11    0.44
  10   5   3   12.93    0.46
  -3  10  -5   12.95    0.43
   5   3  10   13.04    0.43
 -10   5  -3   11.98    0.47
  -5   3 -10   12.57    0.45
 -10  -5   3   12.57    0.45
  -3 -10   5   12.72    0.46
 -10  -5   3   12.22    0.45
   3  10   5   12.57    0.46
   3 -10  -5   12.51    0.46
  -3 -10   5   12.52    0.46
   5  -3 -10   12.27    0.48
   7  -3  10    6.03    0.25
   3  10  -7    6.48    0.26
 -10  -7  -3    6.20    0.28
  10   7  -3    5.92    0.27
   3 -10   7    6.96    0.24
   3 -10   7    6.95    0.26
  -3  10   7    6.56    0.26
  -3 -10  -7    6.46    0.26
 -10  -7  -3    6.41    0.28
   7   3 -10    6.10    0.29
 -10   7   3    6.77    0.29
 -10   7   3    6.39    0.26
  -7   3  10    6.36    0.25
  -3 -10  -7    6.50    0.27
  -3  10   7    6.33    0.24
  -7   3  10    6.29    0.26
  -7  -3 -10    6.42    0.29
   7  -3  10    6.24    0.24
   3  10  -7    6.65    0.29
  -3  10   7    6.28    0.27
   7   3 -10    6.30    0.26
  -3 -10  -7    6.64    0.24
 -10   7   3    6.69    0.24
  -7  -3 -10    6.17    0.26
  10  -7   3    6.39    0.26
   7   3 -10    6.62    0.24
  10   7  -3    6.26    0.26
   7  -3 -10    6.69    0.27
   3 -10  -7    6.25    0.26
  -7   3 -10    6.16    0.26
  -7  -3  10    6.64    0.25
   3 -10  -7    6.22    0.24
 -10   7  -3    6.63    0.29
   7   3  10    6.27    0.26
   7   3  10    6.74    0.24
   7   3  10    6.44    0.26
  -7  -3  10    6.43    0.26
  -3  10  -7    6.31    0.29
  -3 -10   7    6.41    0.26
  -7   3 -10    5.97    0.28
 -10   7  -3    6.58    0.25
  -3  10  -7    6.79    0.26
  10   7   3    6.46    0.28
  10   7   3    6.60    0.23
  10   7   3    6.54    0.27
  10  -7  -3    6.75    0.27
   3  10   7    6.78    0.28
   7  -3 -10    6.50    0.29
 -10  -7   3    6.36    0.26
 -10  -7   3    6.47    0.27
 -10  -7   3    6.25    0.26
  10  -7  -3    6.61    0.25
   3 -10  -7    6.08    0.26
   3  10   7    6.60    0.26
  -3 -10   7    6.46    0.27
  -9  -3 -10    1.92    0.12
 -10   9   3    2.05    0.12
   9  -3  10    1.94    0.10
   9   3 -10    2.01    0.10
   9   3 -10    2.01    0.16
  -9  -3 -10    1.93    0.12
  -9  -3 -10    1.91    0.15
 -10   9   3    2.08    0.11
   3  10  -9    1.96    0.12
  -3 -10  -9    2.15    0.11
  -3 -10  -9    1.94    0.13
  10   9  -3    2.04    0.14
  10  -9   3    1.93    0.12
  10  -9   3    1.87    0.09
   9  -3  10    1.85    0.12
  -9   3  10    1.72    0.11
   3  10  -9    1.73    0.15
  -9   3  10    1.94    0.12
   9   3 -10    2.04    0.12
  -3 -10  -9    2.01    0.13
 -10  -9  -3    1.83    0.15
 -10  -9  -3    1.81    0.14
  -3  10   9    1.95    0.09
  -3  10   9    1.96    0.12
  -3  10   9    2.01    0.14
  10   9  -3    1.99    0.12
   3 -10   9    1.76    0.11
 -10   9   3    1.97    0.15
  -3 -10   9    1.65    0.12
  -3  10  -9    1.83    0.16
  -9   3 -10    1.98    0.13
   3  10   9    1.84    0.14
   9  -3 -10    1.70    0.14
   9  -3 -10    1.52    0.14
  -9  -3  10    1.97    0.11
  -9  -3  10    2.04    0.12
  -3  10  -9    1.79    0.12
   9   3  10    1.86    0.13
   9   3  10    1.90    0.10
 -10   9  -3    1.96    0.11
   3 -10  -9    1.92    0.12
  10  -9  -3    1.92    0.10
  10   9   3    1.95    0.13
 -10  -9   3    2.27    0.15
 -10   9  -3    1.65    0.14
   9   3  10    1.92    0.11
 -10  -9   3    1.78    0.12
  -9   3 -10    1.95    0.14
  10  -9  -3    2.03    0.13
   3  10   9    1.95    0.12
   3 -10  -9    2.05    0.13
  10   9   3    1.83    0.14
 -10  -9   3    1.85    0.12
   9  -3 -10    1.84    0.12
   3 -10  -9    1.88    0.10
 -10   0  -4    0.11    0.04
 -10   0  -4    0.13    0.05
   0  -4  10    0.08    0.04
   4  10   0    0.11    0.03
  -4  10   0    0.08    0.05
  10   0  -4    0.11    0.05
  10   0  -4    0.07    0.05
  10   0  -4    0.02    0.04
  10   0   4    0.13    0.05
  10   0   4    0.09    0.04
  -4  10   0    0.06    0.03
  -4  10   0    0.10    0.03
   0   4 -10    0.10    0.03
   0   4  10    0.13    0.03
   4  10   0    0.19    0.05
   4  10   0    0.08    0.04
   0  -4 -10    0.03    0.05
   0  -4 -10    0.06    0.03
  -4  10   0    0.11    0.04
   0  -4 -10    0.07    0.05
   0   4  10    0.08    0.04
 -10   0   4    0.08    0.03
  -4 -10   0    0.11    0.02
  -4 -10   0    0.11    0.05
   0   4 -10    0.05    0.06
   0   4 -10    0.10    0.03
 -10   0  -4    0.07    0.03
 -10   0   4    0.06    0.04
  10   0   4    0.14    0.03
  -4 -10   0    0.14    0.05
  -4 -10  -2   14.08    0.52
   4  10  -2   13.62    0.50
   2  -4  10   14.26    0.50
   2  -4  10   14.44    0.49
   4  10  -2   14.52    0.49
  10  -2   4   14.15    0.50
  -2  -4 -10   13.60    0.50
  10  -2   4   13.75    0.50
 -10   2   4   14.18    0.50
  -2   4  10   14.09    0.50
  -2   4  10   13.71    0.50
  10   2  -4   14.05    0.51
  -4 -10  -2   14.39    0.51
 -10  -2  -4   13.93    0.50
  -2  -4 -10   13.63    0.50
   2   4 -10   14.09    0.48
   2   4 -10   13.56    0.53
   2   4 -10   13.38    0.51
  -4  10   2   14.33    0.49
  -4  10   2   14.61    0.49
   4 -10   2   14.01    0.49
 -10  -2  -4   13.83    0.52
 -10  -2  -4   13.80    0.49
  -4  10   2   14.13    0.50
  10   2  -4   14.18    0.51
  -4  10   2   14.09    0.51
  10   2  -4   14.21    0.52
 -10   2   4   14.38    0.48
  -4 -10  -2   13.99    0.48
  -2  -4 -10   13.56    0.51
  -4 -10   2   13.67    0.51
  -4 -10   2   13.51    0.51
  10   2   4   13.46    0.51
   4  10   2   13.82    0.51
   2   4  10   13.37    0.49
  -4  10  -2   14.20    0.52
  -4  10  -2   14.08    0.48
   2   4  10   14.01    0.50
  10   2   4   13.73    0.48
  -4  10  -2   14.13    0.50
  10  -2  -4   13.68    0.49
  -2   4 -10   13.41    0.52
  10   2   4   13.87    0.50
  10  -2  -4   13.78    0.51
  -2   4 -10   14.16    0.49
   4  10   2   13.45    0.51
  -4 -10   2   13.47    0.50
  -2  -4  10   13.91    0.48
  -2  -4  10   14.15    0.50
  10  -2  -4   13.96    0.52
   2  -4 -10   13.89    0.52
   2  -4 -10   13.37    0.51
 -10   2  -4   13.36    0.51
 -10  -2   4   14.09    0.50
 -10  -2   4   13.85    0.49
 -10   2  -4   13.45    0.50
  -4  10   4    0.01    0.04
   4 -10   4    0.00    0.03
  -4  10   4    0.02    0.03
  -4 -10  -4    0.00    0.03
  -4 -10  -4    0.00    0.04
   4   4 -10    0.06    0.06
  -4   4  10   -0.01    0.04
 -10  -4  -4   -0.03    0.04
   4   4 -10    0.05    0.04
  -4  -4 -10   -0.02    0.04
  -4  -4 -10   -0.05    0.05
   4  -4  10    0.00    0.03
   4   4 -10    0.01    0.02
  -4   4  10   -0.03    0.03
  10   4  -4    0.09    0.05
  10   4  -4    0.04    0.05
 -10   4   4    0.03    0.04
 -10   4   4    0.01    0.03
  -4 -10  -4    0.02    0.04
   4  10  -4    0.04    0.04
  10  -4   4    0.04    0.04
  -4  10   4    0.00    0.04
  -4  -4 -10    0.02    0.04
   4  10  -4    0.03    0.04
  -4  10   4   -0.01    0.03
 -10  -4  -4   -0.02    0.03
   4 -10   4   -0.02    0.03
  10  -4   4   -0.01    0.04
 -10  -4  -4   -0.03    0.05
   4  -4  10    0.01    0.03
  10   4   4   -0.02    0.04
 -10   4  -4    0.05    0.04
  -4 -10   4    0.04    0.04
  10   4   4   -0.01    0.05
 -10  -4   4    0.02    0.03
 -10   4  -4    0.03    0.03
   4  -4 -10   -0.01    0.05
  -4 -10   4    0.01    0.03
   4  10   4    0.00    0.04
   4  10   4   -0.03    0.04
  10  -4  -4    0.03    0.05
  -4  -4  10    0.01    0.02
  -4  -4  10    0.00    0.04
  -4   4 -10    0.04    0.05
   4   4  10   -0.05    0.04
  -4 -10   4   -0.01    0.04
   4   4  10    0.02    0.04
   4  -4 -10    0.04    0.04
  -4  10  -4    0.03    0.03
  10   4   4   -0.02    0.03
  -4  10  -4    0.01    0.02
  -4   4 -10   -0.01    0.03
  10  -4  -4    0.04    0.03
 -10  -4   4    0.01    0.03
  10  -4  -4    0.03    0.04
  -4  10  -4   -0.07    0.04
  -4 -10  -6   13.29    0.50
   6  -4  10   13.52    0.47
  10   6  -4   13.84    0.50
   6   4 -10   12.85    0.51
   4  10  -6   13.61    0.50
 -10   6   4   13.81    0.48
  10  -6   4   12.93    0.48
   6   4 -10   13.06    0.47
 -10  -6  -4   12.95    0.51
 -10  -6  -4   13.14    0.50
   4 -10   6   13.75    0.46
  -4  10   6   13.46    0.46
  -6   4  10   13.25    0.48
  -6   4  10   13.10    0.48
  -4 -10  -6   13.54    0.48
 -10   6   4   14.13    0.47
  -4  10   6   13.44    0.48
   4  10  -6   13.48    0.49
   4 -10   6   13.61    0.48
  -6  -4 -10   13.41    0.48
  -6  -4 -10   13.15    0.51
  10   6  -4   13.29    0.49
   6  -4  10   13.18    0.48
   6   4 -10   13.74    0.48
  -4  10   6   12.75    0.49
   6   4  10   13.14    0.48
  10  -6  -4   13.49    0.47
  10  -6  -4   13.12    0.50
   4 -10  -6   13.12    0.49
  10   6   4   13.59    0.46
   6   4  10   13.72    0.46
   4 -10  -6   13.32    0.47
  -4 -10   6   13.71    0.46
 -10   6  -4   12.30    0.50
 -10   6  -4   13.28    0.48
 -10  -6   4   12.74    0.49
  10  -6  -4   13.32    0.51
  10   6   4   13.21    0.49
   6   4  10   12.70    0.48
  -6  -4  10   13.67    0.47
  -6  -4  10   13.39    0.49
  -4 -10   6   13.25    0.49
 -10  -6   4   13.38    0.48
  -4  10  -6   12.52    0.51
  -4  10  -6   14.01    0.45
   6  -4 -10   12.93    0.49
  10   6   4   13.30    0.50
  -6   4 -10   13.09    0.51
  -6   4 -10   13.25    0.48
 -10  -6   4   13.11    0.48
  -4  10  -6   13.65    0.48
   6  -4 -10   12.93    0.51
  10   6   4   13.67    0.49
   4  10   6   13.15    0.49
  -4 -10   6   13.56    0.49
   4  10   6   13.28    0.50
   8   4 -10    0.09    0.03
  -8  -4 -10    0.12    0.07
   8   4 -10    0.13    0.04
 -10  -8  -4    0.12    0.06
  10  -8   4    0.11    0.05
 -10  -8  -4    0.17    0.07
   8  -4  10    0.08    0.04
  -4  10   8    0.10    0.05
  -4  10   8    0.12    0.06
 -10   8   4    0.10    0.04
  -8  -4 -10    0.14    0.04
  10   8  -4    0.10    0.05
   8  -4  10    0.05    0.03
   4  10  -8    0.16    0.07
 -10   8   4    0.13    0.04
  -8   4  10    0.05    0.04
   4 -10   8    0.14    0.04
   4  10  -8    0.11    0.04
  -4  10   8    0.10    0.03
  -4 -10  -8    0.18    0.03
  -4 -10  -8    0.19    0.05
  -8  -4 -10    0.21    0.05
   8   4 -10    0.11    0.07
  10  -8   4    0.12    0.02
  10   8  -4    0.07    0.05
  -4 -10  -8    0.11    0.06
  -8   4  10    0.09    0.04
 -10  -8   4    0.16    0.05
   4  10   8    0.17    0.06
   8  -4 -10    0.09    0.05
   8  -4 -10    0.12    0.06
   8   4  10    0.10    0.04
   4  10   8    0.10    0.05
  -8  -4  10    0.13    0.04
   8   4  10    0.17    0.06
  10   8   4    0.20    0.05
  -8   4 -10    0.05    0.04
  10  -8  -4    0.14    0.05
   4 -10  -8    0.03    0.04
  -8   4 -10    0.08    0.06
  -4  10  -8    0.18    0.05
 -10  -8   4    0.13    0.06
 -10  -8   4    0.11    0.05
 -10   8  -4    0.09    0.06
 -10   8  -4    0.15    0.04
  -4 -10   8    0.12    0.04
  -4 -10   8    0.11    0.05
   8   4  10    0.15    0.04
   8  -4 -10    0.09    0.07
   4 -10  -8    0.08    0.04
   4 -10  -8    0.22    0.06
  -8  -4  10    0.09    0.05
  -4  10  -8   -0.02    0.06
  10  -8  -4    0.12    0.03
  10   8   4    0.09    0.06
 -10   1   5    0.01    0.03
  -5 -10  -1    0.04    0.03
  -5 -10  -1    0.05    0.05
  -5 -10  -1    0.04    0.05
   5  10  -1    0.03    0.04
 -10   1   5    0.01    0.03
   1  -5  10   -0.01    0.03
   1   5 -10    0.04    0.03
  10  -1   5    0.07    0.04
  -1   5  10    0.04    0.02
   1   5 -10   -0.03    0.05
  -1  -5 -10   -0.01    0.04
  -5  10   1    0.00    0.04
  -5  10   1    0.01    0.03
  -5  10   1    0.03    0.04
  10  -1   5    0.06    0.02
   1   5 -10    0.00    0.02
  -1   5  10    0.06    0.04
  -1   5  10    0.04    0.04
  -1  -5 -10    0.00    0.05
   5  10  -1    0.03    0.03
 -10  -1  -5    0.05    0.04
 -10  -1  -5    0.06    0.05
  10   1  -5   -0.05    0.05
  10   1  -5    0.09    0.05
  10  -1   5    0.03    0.04
  -1  -5 -10    0.01    0.03
 -10  -1  -5    0.01    0.03
  -5  10   1    0.05    0.03
  10   1  -5    0.09    0.05
  -5 -10   1   -0.01    0.04
  -1   5 -10   -0.05    0.03
  -1   5 -10    0.09    0.03
 -10   1  -5    0.02    0.03
  -5  10  -1    0.05    0.05
   1  -5 -10    0.09    0.05
 -10   1  -5    0.01    0.04
  -1  -5  10   -0.01    0.04
  10  -1  -5    0.01    0.04
  -5  10  -1   -0.03    0.02
  -5 -10   1    0.02    0.05
  10   1   5    0.01    0.03
 -10  -1   5    0.01    0.03
   1   5  10    0.01    0.04
   1   5  10    0.02    0.03
  -5  10  -1    0.00    0.03
   5  10   1    0.04    0.04
   5  10   1    0.02    0.04
  10   1   5    0.08    0.04
  10   1   5    0.00    0.04
  -1   5 -10    0.00    0.06
 -10   1  -5    0.09    0.04
   1  -5 -10   -0.02    0.04
 -10  -1   5    0.02    0.03
  -5  10  -1    0.02    0.03
  10  -1  -5    0.05    0.04
  10  -1  -5    0.01    0.05
  -5 -10   1    0.07    0.05
  -5 -10  -3   12.85    0.47
  -3   5  10   12.83    0.45
   3  -5  10   11.91    0.44
 -10   3   5   12.67    0.45
  -3   5  10   12.61    0.46
  -5 -10  -3   12.96    0.47
  -5  10   3   12.17    0.47
  -5  10   3   12.29    0.44
  10   3  -5   12.06    0.47
   5  10  -3   12.54    0.46
   3   5 -10   12.29    0.46
  -5  10   3   12.21    0.45
  -5 -10  -3   12.94    0.44
  -3  -5 -10   12.82    0.47
   5 -10   3   12.64    0.45
 -10   3   5   13.14    0.44
  10  -3   5   12.96    0.46
 -10  -3  -5   12.64    0.48
 -10  -3  -5   12.84    0.46
 -10  -3  -5   13.13    0.45
   3   5 -10   12.43    0.49
   3  -5  10   12.02    0.45
  10   3  -5   11.83    0.46
  -3  -5 -10   12.12    0.46
   5  10  -3   12.91    0.45
  -5  10   3   12.47    0.46
   3   5 -10   12.48    0.44
  -3  -5 -10   12.25    0.45
  10  -3   5   12.24    0.45
   3   5  10   12.60    0.45
  -3   5 -10   11.92    0.48
  -5  10  -3   12.71    0.43
  -5  10  -3   12.58    0.48
  -3   5 -10   12.46    0.43
  -5 -10   3   12.15    0.45
   3  -5 -10   12.23    0.46
  -3  -5  10   12.74    0.46
   5  10   3   12.13    0.47
  -5  10  -3   12.60    0.45
 -10  -3   5   12.03    0.44
  -3  -5  10   12.92    0.43
  10   3   5   12.86    0.47
   3  -5 -10   12.34    0.47
   5  10   3   12.55    0.47
  -5 -10   3   12.18    0.47
  10  -3  -5   12.38    0.45
 -10  -3   5   12.05    0.45
   3   5  10   13.11    0.46
 -10   3  -5   12.64    0.47
 -10   3  -5   12.08    0.45
  10  -3  -5   12.48    0.47
  10  -3  -5   12.57    0.48
  -5 -10   3   11.79    0.46
  10   3   5   12.58    0.45
  10   3   5   12.99    0.45
  -5   5  10   10.77    0.39
  10  -5   5   10.83    0.39
   5  10  -5   10.93    0.40
  -5 -10  -5   10.58    0.39
  -5  10   5   10.97    0.37
  -5  10   5   10.59    0.39
  -5   5  10   10.80    0.39
  -5  -5 -10   10.19    0.41
 -10   5   5   10.18    0.39
   5 -10   5   10.37    0.37
   5   5 -10    9.95    0.38
   5   5 -10   10.21    0.43
   5   5 -10   10.13    0.39
 -10   5   5   10.50    0.38
 -10  -5  -5   10.28    0.40
  10   5  -5   10.41    0.40
  10   5  -5   10.64    0.40
   5  10  -5   10.46    0.40
  -5 -10  -5   10.95    0.41
   5  -5  10   10.15    0.38
  -5  10   5   10.60    0.40
 -10  -5  -5   10.79    0.37
 -10  -5  -5    9.66    0.42
  -5  -5 -10   10.70    0.39
  -5  -5 -10   10.51    0.41
  -5 -10  -5   10.65    0.41
   5  -5  10   10.67    0.38
   5 -10   5    9.78    0.38
  10  -5  -5    9.99    0.40
  -5  10  -5    9.74    0.41
   5   5  10   10.78    0.39
   5  -5 -10   10.58    0.40
   5  10   5   10.83    0.40
   5  -5 -10   10.57    0.39
 -10   5  -5   10.60    0.41
 -10   5  -5   10.62    0.39
  -5  10  -5   10.04    0.39
   5  10   5   10.96    0.41
   5 -10  -5   10.70    0.39
  -5  -5  10   10.39    0.37
  -5  -5  10   10.25    0.39
   5  -5 -10   10.35    0.41
  10   5   5   10.83    0.39
  10  -5  -5   10.22    0.38
  -5 -10   5   10.16    0.40
  10  -5  -5    9.89    0.41
  -5   5 -10   10.99    0.38
   5   5  10   10.66    0.40
   5 -10  -5   11.32    0.41
  10   5   5   10.55    0.41
  -5 -10   5   10.73    0.40
  10   5   5   10.40    0.39
 -10  -5   5   10.56    0.39
 -10  -5   5   10.81    0.39
  -5   5 -10   10.67    0.42
  -5 -10   5   10.90    0.37
  -5  10  -5   10.52    0.36
  10  -7   5    0.37    0.06
   7   5 -10    0.54    0.06
 -10   7   5    0.35    0.06
  -7  -5 -10    0.26    0.08
  -7   5  10    0.35    0.06
  -7   5  10    0.37    0.06
  -5 -10  -7    0.35    0.07
  -5 -10  -7    0.31    0.06
 -10  -7  -5    0.34    0.08
   7  -5  10    0.48    0.06
   5  10  -7    0.34    0.06
   7  -5  10    0.46    0.05
  -5 -10  -7    0.33    0.06
  10   7  -5    0.42    0.07
 -10  -7  -5    0.35    0.07
 -10   7   5    0.42    0.05
  -7  -5 -10    0.42    0.05
   7   5 -10    0.48    0.05
  10  -7   5    0.41    0.03
  10   7  -5    0.38    0.07
  -5  10   7    0.41    0.04
   5 -10   7    0.47    0.03
   5 -10   7    0.41    0.05
  -5  10   7    0.33    0.06
  -5  10   7    0.34    0.07
   7   5 -10    0.42    0.09
   5  10  -7    0.31    0.07
   7  -5 -10    0.28    0.06
  -7   5 -10    0.40    0.05
   7   5  10    0.45    0.07
  -5  10  -7    0.31    0.06
 -10   7  -5    0.35    0.08
  -7  -5  10    0.49    0.05
 -10  -7   5    0.37    0.06
  -5 -10   7    0.38    0.04
 -10  -7   5    0.41    0.06
   5 -10  -7    0.47    0.06
   5 -10  -7    0.35    0.07
  -7  -5  10    0.47    0.07
 -10   7  -5    0.35    0.05
   7  -5 -10    0.34    0.08
  -5  10  -7    0.44    0.03
   5  10   7    0.34    0.07
  -5 -10   7    0.33    0.06
  -5 -10   7    0.32    0.06
  -7   5 -10    0.35    0.08
  10   7   5    0.36    0.08
   7   5  10    0.45    0.04
   7   5  10    0.32    0.06
  10  -7  -5    0.43    0.05
  10  -7  -5    0.45    0.07
  10  -7  -5    0.40    0.08
   7  -5 -10    0.36    0.07
  -5  10  -7    0.29    0.08
  10   7   5    0.42    0.06
   5  10   7    0.36    0.07
  -9  -5 -10    2.15    0.16
  -9  -5 -10    1.83    0.11
  -5  10   9    1.77    0.08
   5  10  -9    1.58    0.11
  10  -9   5    1.75    0.12
  10  -9   5    1.75    0.08
  -5 -10  -9    1.97    0.13
   9   5 -10    1.70    0.10
 -10  -9  -5    1.97    0.15
  -5  10   9    1.96    0.12
  10   9  -5    1.79    0.13
  -9  -5 -10    1.81    0.12
 -10  -9  -5    2.05    0.16
  -5  10   9    1.80    0.13
   5 -10   9    1.83    0.11
  -9   5  10    1.65    0.11
  -9   5  10    1.64    0.11
  -5 -10  -9    1.82    0.09
   9   5 -10    1.62    0.15
 -10   9   5    1.88    0.12
  10   9  -5    1.73    0.13
   9   5 -10    1.87    0.11
   5  10  -9    1.91    0.16
  -5 -10  -9    1.65    0.14
 -10   9   5    1.99    0.12
   9  -5  10    1.81    0.12
   9  -5  10    1.82    0.10
   9   5  10    1.82    0.12
  10   9   5    1.79    0.14
  10   9   5    2.03    0.13
   9  -5 -10    1.87    0.16
  -9   5 -10    1.89    0.15
  -9   5 -10    1.72    0.11
 -10  -9   5    1.75    0.11
  -5 -10   9    1.74    0.12
  10  -9  -5    1.50    0.14
  10  -9  -5    1.80    0.10
  10  -9  -5    1.72    0.13
  -9  -5  10    1.87    0.12
 -10   9  -5    1.90    0.15
 -10   9  -5    1.65    0.10
   5 -10  -9    1.84    0.12
   5  10   9    2.11    0.15
   5 -10  -9    1.86    0.11
   5 -10  -9    1.83    0.14
   5  10   9    1.84    0.13
  -5 -10   9    1.76    0.08
   9  -5 -10    1.75    0.14
  -5  10  -9    1.88    0.16
   9  -5 -10    1.67    0.12
 -10  -9   5    1.82    0.14
   9   5  10    1.68    0.13
   9   5  10    1.93    0.10
  -9  -5  10    1.91    0.10
 -10  -9   5    1.75    0.12
   6  10   0    2.28    0.14
  -6  10   0    2.50    0.11
 -10   0  -6    2.42    0.12
  10   0   6    2.52    0.13
  -6  10   0    2.48    0.12
   6  10   0    2.30    0.14
  10   0  -6    2.37    0.13
  10   0  -6    2.43    0.15
  10   0  -6    2.50    0.15
   0  -6  10    2.30    0.13
   0   6 -10    2.40    0.12
   0   6 -10    2.40    0.16
   0   6  10    2.54    0.11
  -6  10   0    2.58    0.15
  10   0   6    2.48    0.13
  -6  10   0    2.23    0.12
   0  -6 -10    2.66    0.14
   0  -6 -10    2.38    0.14
   0  -6 -10    2.40    0.13
  10   0   6    2.42    0.11
  -6 -10   0    2.47    0.14
   0   6  10    2.42    0.13
 -10   0  -6    2.48    0.13
  -6 -10   0    2.31    0.14
   6  10   0    2.54    0.10
 -10   0   6    2.42    0.12
 -10   0   6    2.27    0.11
 -10   0  -6    2.37    0.14
  10  -2   6    0.15    0.03
  10   2  -6    0.05    0.04
  10   2  -6    0.02    0.05
  10  -2   6    0.11    0.04
  -6 -10  -2    0.10    0.05
  -6 -10  -2    0.10    0.06
   6  10  -2    0.10    0.05
   2  -6  10    0.09    0.04
  -2   6  10    0.09    0.05
 -10  -2  -6    0.19    0.04
 -10  -2  -6    0.26    0.06
 -10  -2  -6    0.09    0.04
  -2  -6 -10    0.08    0.04
  -6  10   2    0.08    0.03
 -10   2   6    0.03    0.04
  10  -2   6    0.12    0.04
  -6  10   2    0.11    0.04
  -2  -6 -10    0.08    0.04
  -2  -6 -10    0.18    0.05
  -6  10   2    0.11    0.04
 -10   2   6    0.03    0.03
   6 -10   2    0.05    0.03
  -6  10   2    0.03    0.05
   2   6 -10    0.10    0.03
   6  10  -2    0.11    0.04
   2   6 -10    0.04    0.06
  -2   6  10    0.13    0.05
   6  10   2    0.07    0.05
  -6 -10   2    0.12    0.05
  10  -2  -6    0.04    0.06
  -6 -10   2    0.17    0.05
 -10   2  -6    0.09    0.04
  10  -2  -6    0.01    0.04
  -2   6 -10    0.04    0.02
   2   6  10    0.15    0.04
   2   6  10    0.12    0.05
  -6 -10   2    0.10    0.05
  10   2   6    0.17    0.04
  10  -2  -6    0.04    0.05
  -6  10  -2    0.09    0.04
  -6  10  -2    0.12    0.06
  -6  10  -2    0.07    0.03
 -10  -2   6    0.09    0.04
   2  -6 -10    0.05    0.04
 -10  -2   6    0.14    0.04
  10   2   6    0.14    0.05
  10   2   6    0.12    0.04
  -2   6 -10    0.08    0.03
   2  -6 -10    0.07    0.05
   6  10   2    0.08    0.05
 -10   2  -6    0.06    0.05
  -2   6 -10    0.01    0.06
  -2  -6  10    0.07    0.04
   6 -10   4   13.52    0.47
  -6  10   4   13.56    0.47
  -6  10   4   13.73    0.50
  -6  10   4   13.19    0.48
  -6 -10  -4   14.02    0.48
 -10  -4  -6   13.90    0.47
   6  10  -4   13.26    0.50
  -4  -6 -10   13.11    0.50
   4   6 -10   12.77    0.52
   4   6 -10   13.55    0.48
   6  10  -4   14.01    0.49
 -10  -4  -6   13.22    0.50
  -4   6  10   13.40    0.49
   4  -6  10   13.72    0.48
   4  -6  10   13.30    0.48
  10   4  -6   13.18    0.49
  10   4  -6   13.42    0.51
 -10  -4  -6   13.47    0.52
  10  -4   6   13.12    0.49
  -6 -10  -4   13.84    0.51
  -4  -6 -10   13.24    0.48
  -4  -6 -10   13.35    0.50
  -6  10   4   13.57    0.49
 -10   4   6   13.76    0.47
  -4   6  10   13.24    0.49
  -6 -10  -4   13.24    0.51
   6 -10   4   13.60    0.47
   4   6 -10   13.00    0.49
  10  -4   6   13.85    0.46
 -10   4   6   13.75    0.49
  10   4   6   13.33    0.50
  -6  10  -4   13.46    0.47
  10  -4  -6   13.59    0.48
  -6 -10   4   13.08    0.50
  10  -4  -6   12.87    0.51
  -4   6 -10   13.45    0.46
 -10  -4   6   13.42    0.48
  -6 -10   4   13.28    0.48
  -6 -10   4   12.94    0.50
  -4   6 -10   13.04    0.52
   4  -6 -10   13.71    0.48
   4  -6 -10   13.30    0.50
   4  -6 -10   13.51    0.50
   6  10   4   13.29    0.50
   6  10   4   13.50    0.50
  -6  10  -4   13.49    0.49
  -6  10  -4   13.17    0.51
  10  -4  -6   13.25    0.50
   4   6  10   13.77    0.50
 -10  -4   6   13.26    0.48
 -10   4  -6   12.63    0.50
   4   6  10   13.28    0.49
  -4  -6  10   14.05    0.46
  -4  -6  10   13.82    0.49
   6 -10  -4   13.67    0.49
  10   4   6   13.43    0.48
  10   4   6   13.58    0.48
 -10   4  -6   13.38    0.48
  -6   6  10    0.02    0.04
  -6   6  10   -0.02    0.04
  -6  10   6   -0.03    0.04
   6  -6  10    0.06    0.03
  10  -6   6    0.00    0.02
 -10  -6  -6    0.09    0.06
 -10  -6  -6   -0.03    0.02
  10   6  -6    0.01    0.06
   6  10  -6    0.03    0.04
   6 -10   6   -0.02    0.03
 -10  -6  -6    0.09    0.05
   6  10  -6    0.03    0.05
 -10   6   6   -0.03    0.04
 -10   6   6   -0.04    0.04
   6   6 -10    0.00    0.03
  10  -6   6    0.03    0.04
   6 -10   6    0.01    0.02
  -6  -6 -10   -0.04    0.05
  10   6  -6   -0.03    0.04
  -6  10   6   -0.02    0.04
   6  -6  10   -0.01    0.04
  -6  -6 -10   -0.01    0.03
   6   6 -10    0.00    0.06
   6   6 -10   -0.02    0.04
  -6 -10  -6    0.04    0.05
  -6 -10  -6    0.05    0.05
  -6  -6 -10    0.01    0.05
  -6 -10  -6   -0.06    0.05
 -10  -6   6    0.06    0.04
  -6 -10   6    0.06    0.03
 -10  -6   6   -0.04    0.03
 -10   6  -6    0.09    0.06
   6 -10  -6    0.01    0.04
  -6  10  -6    0.06    0.06
 -10   6  -6    0.05    0.04
  10   6   6    0.04    0.06
   6  10   6   -0.02    0.05
  -6 -10   6    0.01    0.05
   6  10   6    0.04    0.05
  -6  -6  10    0.04    0.05
   6   6  10   -0.05    0.05
   6   6  10    0.03    0.05
   6  -6 -10   -0.03    0.05
   6  -6 -10    0.04    0.04
  10  -6  -6    0.04    0.03
  -6 -10   6    0.01    0.05
   6 -10  -6    0.04    0.05
  10   6   6    0.05    0.04
  10  -6  -6    0.00    0.05
   6  -6 -10    0.06    0.05
  10   6   6   -0.01    0.04
  -6  -6  10    0.04    0.03
  -6  10  -6    0.04    0.02
  -6   6 -10   -0.03    0.06
  -6   6 -10    0.00    0.03
  10  -6  -6   -0.03    0.05
  -6 -10  -8    2.91    0.17
   8   6 -10    2.93    0.19
  -8  -6 -10    3.18    0.17
  -6  10   8    2.98    0.16
  -6  10   8    3.13    0.17
  -8   6  10    2.97    0.16
  -8   6  10    3.27    0.16
  -8  -6 -10    3.37    0.20
 -10   8   6    3.47    0.16
   6  10  -8    3.40    0.16
 -10  -8  -6    3.15    0.18
   6 -10   8    3.13    0.15
 -10   8   6    3.20    0.16
 -10  -8  -6    3.14    0.20
  10  -8   6    3.39    0.17
   8  -6  10    3.01    0.16
  10   8  -6    2.97    0.17
   8  -6  10    3.01    0.14
   8   6 -10    3.06    0.15
  -8  -6 -10    3.18    0.14
   8   6 -10    2.94    0.15
   6 -10   8    3.10    0.16
  10   8  -6    3.43    0.18
   6  10  -8    3.13    0.19
  10   8  -6    3.20    0.13
  -6 -10  -8    3.16    0.17
  -6 -10  -8    3.34    0.19
  10  -8   6    3.12    0.13
   6  10   8    3.39    0.18
  10  -8  -6    3.45    0.18
  -8  -6  10    3.17    0.14
 -10   8  -6    3.16    0.15
 -10  -8   6    3.21    0.15
  10   8   6    3.11    0.17
   6 -10  -8    3.13    0.16
   8  -6 -10    3.17    0.17
   8  -6 -10    3.45    0.20
  -8  -6  10    3.27    0.17
  -6  10  -8    3.03    0.20
   6 -10  -8    3.72    0.16
   6 -10  -8    3.20    0.18
   6  10   8    3.26    0.18
  10  -8  -6    2.88    0.14
  10   8   6    2.94    0.18
   8   6  10    3.24    0.14
   8   6  10    3.49    0.17
  -8   6 -10    3.14    0.14
 -10  -8   6    3.24    0.16
   6 -10  -8    3.25    0.13
 -10   8  -6    3.16    0.19
  10  -8  -6    3.18    0.19
   8  -6 -10    3.23    0.17
  -6  10  -8    3.16    0.12
  -8   6 -10    3.28    0.20
   8   6  10    3.20    0.17
  -6 -10   8    3.37    0.17
  -6 -10   8    3.26    0.13
 -10  -1  -7   26.23    0.88
  -7  10   1   24.83    0.87
  10   1  -7   23.80    0.87
   7  10  -1   24.17    0.89
  -7 -10  -1   26.27    0.90
 -10  -1  -7   25.74    0.87
   1   7 -10   25.04    0.87
  10  -1   7   24.99    0.86
   7  10  -1   26.77    0.86
  -1  -7 -10   25.27    0.89
  -1  -7 -10   25.77    0.89
  -7 -10  -1   26.19    0.90
  10  -1   7   24.26    0.88
  -1   7  10   24.94    0.85
  10  -1   7   25.54    0.87
  -1   7  10   24.86    0.89
 -10   1   7   25.67    0.87
  -7  10   1   24.59    0.87
   7 -10   1   25.87    0.87
  10   1  -7   23.68    0.90
   1   7 -10   24.50    0.91
  -1  -7 -10   26.03    0.88
 -10  -1  -7   25.73    0.90
   1  -7  10   25.78    0.88
   7 -10   1   25.39    0.86
 -10   1   7   25.12    0.88
  -1   7  10   25.87    0.88
  -7  10   1   24.70    0.90
  -7  10  -1   25.62    0.86
   7  10   1   25.34    0.89
   1   7  10   25.54    0.86
  -1  -7  10   25.20    0.88
   1  -7 -10   25.07    0.88
  -1   7 -10   24.25    0.91
 -10   1  -7   26.49    0.86
 -10   1  -7   24.59    0.89
   1  -7 -10   24.49    0.89
  -7 -10   1   24.51    0.88
  -7 -10   1   25.46    0.90
  -7 -10   1   25.51    0.89
  10   1   7   26.75    0.87
   1   7  10   25.94    0.89
   7 -10  -1   25.11    0.87
  -7  10  -1   25.09    0.90
  10   1   7   26.27    0.89
 -10  -1   7   25.23    0.87
 -10  -1   7   25.29    0.87
  -1   7 -10   25.52    0.87
 -10   1  -7   25.37    0.89
   7  10   1   26.14    0.89
  10  -1  -7   25.04    0.87
  10  -1  -7   25.18    0.90
  10  -1  -7   25.55    0.90
  10   1   7   25.79    0.86
  10   3  -7    6.47    0.26
  -3   7  10    6.34    0.26
 -10  -3  -7    6.55    0.26
  -7 -10  -3    6.35    0.28
  -3  -7 -10    6.59    0.28
  10   3  -7    6.49    0.28
  -7  10   3    6.25    0.25
   7 -10   3    6.37    0.26
   7 -10   3    6.48    0.24
  10  -3   7    6.37    0.23
  -3   7  10    6.50    0.27
 -10   3   7    6.87    0.26
   3   7 -10    6.51    0.25
   3   7 -10    6.57    0.30
   7  10  -3    5.92    0.27
   7  10  -3    6.66    0.26
  -7  10   3    6.71    0.28
 -10   3   7    6.81    0.25
   3  -7  10    6.56    0.25
  10  -3   7    6.22    0.26
  10  -3   7    6.54    0.26
  -7  10   3    6.30    0.26
  -3  -7 -10    6.10    0.25
 -10  -3  -7    6.41    0.25
 -10  -3  -7    6.10    0.28
  -3  -7 -10    6.62    0.27
  -7 -10  -3    6.45    0.28
   7  10   3    6.39    0.28
   3   7  10    6.14    0.27
   7 -10  -3    6.40    0.24
 -10  -3   7    6.49    0.25
   7 -10  -3    6.52    0.26
 -10   3  -7    6.28    0.28
   3  -7 -10    6.10    0.27
  -3  -7  10    6.67    0.27
  -7 -10   3    6.13    0.26
  -7 -10   3    5.95    0.27
  -7 -10   3    5.96    0.27
  -7  10  -3    6.67    0.29
  -7  10  -3    6.66    0.24
  -3   7 -10    6.65    0.30
  10  -3  -7    6.87    0.25
  -3  -7  10    6.55    0.22
  10  -3  -7    6.60    0.29
   3  -7 -10    6.69    0.27
 -10  -3   7    6.90    0.26
  10   3   7    6.47    0.25
  10   3   7    6.44    0.25
   7  10   3    6.55    0.28
   3  -7 -10    6.39    0.24
   3   7  10    6.38    0.26
  10   3   7    6.34    0.27
 -10   3  -7    6.26    0.26
  10  -3  -7    6.80    0.28
   7 -10   5    0.48    0.04
   5   7 -10    0.41    0.05
   5   7 -10    0.21    0.08
   5   7 -10    0.31    0.06
  -5   7  10    0.42    0.06
  -5  -7 -10    0.32    0.07
 -10   5   7    0.36    0.06
 -10  -5  -7    0.48    0.05
  -7 -10  -5    0.34    0.07
   7 -10   5    0.47    0.05
   5  -7  10    0.40    0.05
  10   5  -7    0.32    0.06
  10   5  -7    0.41    0.08
   5  -7  10    0.41    0.06
  10  -5   7    0.28    0.06
  10  -5   7    0.44    0.04
 -10  -5  -7    0.29    0.08
   7 -10   5    0.40    0.06
  -7 -10  -5    0.50    0.09
 -10   5   7    0.50    0.06
  -7  10   5    0.28    0.05
  -5   7  10    0.47    0.07
  -5  -7 -10    0.38    0.07
   7  10  -5    0.36    0.07
   7  10  -5    0.42    0.07
  -5  -7 -10    0.42    0.05
 -10  -5  -7    0.39    0.07
  -7  10   5    0.29    0.06
  -7  10  -5    0.35    0.08
  10  -5  -7    0.43    0.05
   7  10   5    0.47    0.07
  10   5   7    0.41    0.08
  -5   7 -10    0.31    0.08
  -7 -10   5    0.39    0.05
  -7 -10   5    0.39    0.07
  -7 -10   5    0.33    0.06
   5  -7 -10    0.25    0.06
  10  -5  -7    0.26    0.08
   7 -10  -5    0.37    0.06
  -5  -7  10    0.43    0.07
 -10   5  -7    0.36    0.08
  10   5   7    0.36    0.06
 -10  -5   7    0.30    0.05
   5  -7 -10    0.40    0.06
 -10  -5   7    0.41    0.06
   7 -10  -5    0.44    0.04
  10  -5  -7    0.34    0.07
  -7  10  -5    0.43    0.04
  -5  -7  10    0.47    0.04
   5   7  10    0.32    0.06
   5   7  10    0.29    0.06
  -5   7 -10    0.32    0.04
  10   5   7    0.42    0.06
   7 -10  -5    0.49    0.08
 -10   5  -7    0.37    0.05
   7  10   5    0.30    0.07
   5  -7 -10    0.46    0.08
 -10  -7  -7    8.14    0.36
  -7  10   7    8.47    0.34
   7  10  -7    8.86    0.35
  -7  -7 -10    8.38    0.31
   7  10  -7    9.09    0.34
  -7  -7 -10    8.42    0.34
  10  -7   7    8.93    0.34
  10  -7   7    8.77    0.30
 -10  -7  -7    8.18    0.35
   7 -10   7    8.16    0.33
   7 -10   7    8.02    0.31
  10   7  -7    8.69    0.34
  -7  10   7    8.60    0.33
  -7   7  10    8.89    0.34
   7  -7  10    8.75    0.32
   7   7 -10    8.35    0.32
 -10   7   7    8.28    0.33
 -10   7   7    8.30    0.32
  -7 -10  -7    8.20    0.36
 -10  -7  -7    8.28    0.30
   7   7 -10    8.24    0.37
   7   7 -10    8.36    0.32
  -7  -7 -10    8.45    0.36
  -7 -10  -7    8.08    0.35
  -7   7  10    8.73    0.34
  10   7  -7    8.88    0.31
  10   7  -7    8.72    0.36
   7  -7  10    8.78    0.33
 -10  -7   7    8.85    0.34
  -7  10  -7    8.23    0.30
  10   7   7    8.22    0.35
  10   7   7    8.42    0.34
   7  -7 -10    8.51    0.34
   7  -7 -10    8.70    0.36
   7  -7 -10    8.69    0.34
   7 -10  -7    8.82    0.35
  10  -7  -7    8.25    0.36
   7 -10  -7    9.39    0.34
  -7 -10   7    8.83    0.35
 -10   7  -7    8.51    0.36
   7  10   7    7.93    0.34
  -7   7 -10    8.60    0.37
  -7 -10   7    8.64    0.31
  -7 -10   7    8.50    0.34
   7 -10  -7    8.68    0.30
 -10  -7   7    8.58    0.32
  10  -7  -7    8.19    0.34
   7   7  10    8.43    0.34
  -7   7 -10    8.64    0.31
  -7  -7  10    8.14    0.34
  10  -7  -7    8.19    0.31
   7   7  10    8.39    0.34
  -7  -7  10    8.53    0.31
  -7  10  -7    7.94    0.37
   7  10   7    8.39    0.35
 -10   7  -7    8.79    0.32
  -7 -10  -9   10.59    0.42
   9   7 -10    9.88    0.38
 -10  -9  -7    9.62    0.42
  -7  10   9   10.08    0.39
   9   7 -10   10.19    0.43
  -9   7  10    9.91    0.39
 -10   9   7   10.01    0.39
  10  -9   7   10.40    0.40
 -10  -9  -7   11.02    0.42
  -7  10   9   10.29    0.40
   7  10  -9    9.98    0.42
  -9  -7 -10   10.56    0.43
   9  -7  10   10.15    0.37
  -9  -7 -10   10.67    0.37
  -9   7  10    9.84    0.39
  -7 -10  -9   10.49    0.41
 -10   9   7   10.57    0.39
   9   7 -10   10.51    0.38
   9  -7  10   10.18    0.39
  10   9  -7   10.48    0.40
  -9  -7 -10   10.26    0.40
  10   9  -7   10.10    0.41
   7 -10   9   10.03    0.39
   7 -10   9   10.25    0.38
   7  10  -9   10.09    0.39
  -7 -10  -9   10.06    0.41
  10  -9   7   10.24    0.36
 -10  -9   7    9.89    0.40
 -10   9  -7   10.26    0.43
 -10   9  -7   10.41    0.37
  -7  10  -9    9.80    0.43
  -9   7 -10   10.80    0.43
  -7 -10   9   10.27    0.36
   9  -7 -10    9.90    0.40
   7  10   9   10.23    0.41
  10  -9  -7   10.16    0.40
  -9  -7  10    9.71    0.40
  10   9   7   10.61    0.41
  -9   7 -10   10.05    0.37
   7  10   9    9.95    0.40
  -7 -10   9   10.27    0.40
   7 -10  -9   10.20    0.39
   9  -7 -10    9.78    0.40
   7 -10  -9   10.11    0.40
   9   7  10   10.44    0.41
   9   7  10   10.46    0.40
  10  -9  -7   10.13    0.37
  -9  -7  10   10.53    0.37
  10  -9  -7   10.04    0.42
   9  -7 -10   10.05    0.42
 -10  -9   7    9.91    0.38
   7 -10  -9   10.34    0.41
  10   9   7   10.17    0.41
  -8 -10   0    0.01    0.05
 -10   0  -8   -0.03    0.05
 -10   0  -8    0.03    0.03
 -10   0   8   -0.02    0.03
   8 -10   0    0.03    0.03
   8  10   0   -0.08    0.05
  10   0   8    0.01    0.03
 -10   0   8   -0.04    0.03
  10   0   8   -0.02    0.04
  -8  10   0   -0.01    0.03
  10   0  -8   -0.01    0.06
   0  -8 -10    0.00    0.04
  -8 -10   0    0.00    0.05
 -10   0  -8   -0.01    0.04
   0  -8  10   -0.01    0.04
   0   8 -10   -0.01    0.03
   0   8 -10    0.07    0.07
   0   8  10   -0.01    0.03
   0   8  10    0.00    0.05
  -8 -10   0   -0.02    0.04
  -8  10   0    0.00    0.05
  10   0  -8    0.00    0.04
   0  -8 -10    0.04    0.05
  10   0  -8   -0.05    0.05
  -8  10   0    0.02    0.03
  10   0   8    0.03    0.03
   0  -8 -10    0.00    0.04
   8  10   0    0.02    0.03
 -10   2   8    0.41    0.05
  -8 -10  -2    0.50    0.08
  -8 -10  -2    0.58    0.08
  -8  10   2    0.71    0.09
  -8  10   2    0.53    0.06
 -10  -2  -8    0.32    0.08
  -2  -8 -10    0.60    0.08
   8  10  -2    0.42    0.06
  -2   8  10    0.62    0.08
  10  -2   8    0.52    0.06
 -10   2   8    0.47    0.06
   8  10  -2    0.32    0.07
 -10  -2  -8    0.49    0.06
   2  -8  10    0.58    0.07
   2   8 -10    0.46    0.06
  -2   8  10    0.50    0.07
  10  -2   8    0.54    0.07
 -10  -2  -8    0.50    0.06
  -2   8  10    0.44    0.03
   2   8 -10    0.46    0.09
  -2  -8 -10    0.59    0.07
  -2  -8 -10    0.52    0.06
  -8  10   2    0.63    0.07
   8 -10   2    0.42    0.06
   8 -10   2    0.49    0.05
  10   2  -8    0.56    0.06
  10   2  -8    0.49    0.08
  10  -2   8    0.54    0.05
  10   2   8    0.51    0.06
  -8  10  -2    0.44    0.08
  -8 -10   2    0.48    0.07
  10   2   8    0.46    0.07
   2  -8 -10    0.46    0.07
   2  -8 -10    0.43    0.07
 -10   2  -8    0.37    0.07
   8  10   2    0.45    0.08
  10   2   8    0.55    0.06
  10  -2  -8    0.53    0.06
  -8 -10   2    0.42    0.07
 -10   2  -8    0.43    0.07
 -10   2  -8    0.43    0.04
  -8  10  -2    0.48    0.05
  10  -2  -8    0.49    0.08
 -10  -2   8    0.59    0.06
 -10  -2   8    0.55    0.06
   8 -10  -2    0.57    0.06
   8 -10  -2    0.53    0.07
  10  -2  -8    0.48    0.09
  -2  -8  10    0.43    0.07
   8  10   2    0.49    0.07
   2   8  10    0.61    0.06
  -2   8 -10    0.48    0.09
   2  -8 -10    0.51    0.05
  -8 -10   2    0.42    0.07
   2   8  10    0.48    0.07
  -2   8 -10    0.55    0.06
   4  -8  10    0.05    0.04
   4   8 -10    0.10    0.07
  10   4  -8   -0.01    0.06
   4   8 -10    0.11    0.04
  -4  -8 -10    0.20    0.06
   8 -10   4    0.13    0.03
   8  10  -4    0.05    0.05
  -4  -8 -10    0.16    0.06
   4  -8  10    0.09    0.04
  -4  -8 -10    0.17    0.04
 -10  -4  -8    0.16    0.07
  -8  10   4    0.13    0.05
   8  10  -4    0.05    0.05
 -10   4   8    0.13    0.05
 -10  -4  -8    0.09    0.05
  -8  10   4    0.14    0.06
  10   4  -8    0.12    0.04
 -10  -4  -8    0.19    0.04
  -8 -10  -4    0.18    0.07
  -8 -10  -4    0.06    0.06
  -4   8  10    0.09    0.04
  10   4  -8    0.08    0.04
   8 -10   4    0.11    0.05
  -8  10   4    0.10    0.04
  10  -4   8    0.12    0.03
  -4   8  10    0.02    0.05
  10  -4   8    0.10    0.05
 -10   4   8    0.16    0.04
  -4  -8  10    0.11    0.02
   4  -8 -10    0.08    0.05
  -4   8 -10    0.11    0.07
  -8 -10   4    0.11    0.06
   4   8  10    0.22    0.06
   8 -10  -4    0.14    0.03
  -4  -8  10    0.06    0.05
   8  10   4    0.12    0.05
  10   4   8    0.11    0.04
  10  -4  -8    0.17    0.07
  10  -4  -8    0.03    0.06
 -10   4  -8    0.18    0.07
  10  -4  -8    0.07    0.04
  -8 -10   4    0.09    0.04
  -8  10  -4    0.12    0.03
 -10  -4   8    0.05    0.04
 -10   4  -8    0.13    0.05
   8 -10  -4    0.15    0.05
  -8  10  -4    0.15    0.07
   8  10   4    0.15    0.06
   4  -8 -10    0.08    0.06
 -10  -4   8    0.06    0.04
  10   4   8    0.15    0.04
   4   8  10    0.13    0.06
  10   4   8    0.14    0.07
  -8 -10   4    0.16    0.05
   4  -8 -10    0.09    0.04
  10   6  -8    3.25    0.19
  10   6  -8    3.49    0.14
   6   8 -10    3.05    0.15
   6  -8  10    3.35    0.15
  -6   8  10    3.23    0.16
   6  -8  10    3.12    0.16
 -10   6   8    3.23    0.16
  10  -6   8    3.12    0.16
  10  -6   8    3.17    0.13
  10   6  -8    3.31    0.16
 -10  -6  -8    3.22    0.14
 -10  -6  -8    3.06    0.19
 -10   6   8    3.07    0.15
  -8 -10  -6    3.47    0.19
  -8 -10  -6    3.05    0.18
  -8  10   6    2.99    0.16
   6   8 -10    2.94    0.19
  -6  -8 -10    3.29    0.19
  -6  -8 -10    3.11    0.14
  -6  -8 -10    3.05    0.19
   8 -10   6    3.32    0.16
   8  10  -6    3.20    0.18
   6   8 -10    3.12    0.15
   8  10  -6    3.24    0.17
  -8  10   6    3.16    0.17
   8 -10   6    3.24    0.14
  -6   8  10    2.74    0.16
 -10  -6  -8    3.06    0.17
  -8 -10   6    3.13    0.14
   8 -10  -6    3.13    0.17
  -8 -10   6    3.35    0.18
  -6  -8  10    3.31    0.13
  -6  -8  10    3.16    0.17
  10   6   8    2.99    0.18
  -6   8 -10    3.20    0.13
  10   6   8    3.26    0.16
  -8  10  -6    2.81    0.19
   6  -8 -10    3.42    0.17
  10  -6  -8    2.94    0.19
   6   8  10    3.23    0.17
   8 -10  -6    3.17    0.14
   8 -10  -6    2.96    0.18
 -10  -6   8    3.18    0.15
 -10  -6   8    3.24    0.16
 -10   6  -8    3.19    0.19
 -10   6  -8    3.52    0.15
  -6   8 -10    2.98    0.20
   6   8  10    3.05    0.17
  -8 -10   6    3.30    0.17
   8  10   6    3.32    0.18
   8  10   6    3.42    0.18
  10  -6  -8    3.08    0.14
   6  -8 -10    3.35    0.18
   6  -8 -10    3.30    0.16
  10   6   8    3.32    0.15
  10  -6  -8    3.42    0.18
  -8  10  -6    3.15    0.14
   8  10  -8   -0.08    0.06
   8  10  -8   -0.05    0.05
  10   8  -8    0.05    0.07
  10   8  -8   -0.02    0.05
   8   8 -10    0.12    0.08
   8  -8  10    0.06    0.05
  -8  10   8    0.05    0.05
  -8  10   8   -0.08    0.05
 -10   8   8    0.09    0.05
  -8 -10  -8   -0.06    0.07
  -8 -10  -8    0.07    0.06
  10  -8   8    0.03    0.03
   8 -10   8   -0.04    0.03
  -8  -8 -10    0.01    0.05
  -8  -8 -10    0.05    0.07
  -8  -8 -10    0.01    0.05
   8 -10   8   -0.03    0.04
 -10  -8  -8    0.06    0.07
 -10  -8  -8   -0.04    0.05
 -10   8   8   -0.04    0.05
  -8   8  10   -0.01    0.05
  -8   8  10    0.03    0.05
   8   8 -10    0.03    0.04
   8   8 -10   -0.07    0.04
  10  -8   8    0.04    0.05
   8  -8  10    0.04    0.04
   8 -10  -8    0.00    0.02
   8   8  10   -0.04    0.06
   8 -10  -8    0.04    0.06
  -8  -8  10    0.01    0.03
  -8 -10   8    0.07    0.05
  -8   8 -10   -0.02    0.03
   8  -8 -10   -0.07    0.06
   8 -10  -8   -0.06    0.05
 -10  -8   8   -0.04    0.05
  -8  10  -8    0.01    0.03
  10  -8  -8   -0.01    0.03
 -10   8  -8    0.03    0.04
   8   8  10    0.01    0.05
   8  10   8    0.10    0.07
   8  10   8   -0.05    0.05
  -8  -8  10    0.00    0.05
  -8   8 -10    0.04    0.07
  10  -8  -8    0.01    0.06
 -10   8  -8   -0.07    0.06
   8  -8 -10   -0.05    0.05
  -8  10  -8    0.12    0.08
   8  -8 -10    0.02    0.05
  10   8   8   -0.02    0.06
  10   8   8   -0.07    0.05
 -10  -8   8    0.02    0.04
  10  -8  -8   -0.01    0.06
  -8 -10   8    0.10    0.03
  10  -1   9    3.16    0.16
   1  -9  10    2.99    0.16
   9  10  -1    3.31    0.18
  -9 -10  -1    2.82    0.18
  10   1  -9    3.14    0.14
 -10   1   9    2.83    0.15
  -9 -10  -1    2.84    0.17
   9 -10   1    2.95    0.15
   1   9 -10    3.05    0.15
  -9  10   1    3.15    0.18
  10   1  -9    2.96    0.19
  10   1  -9    2.93    0.15
 -10   1   9    2.88    0.15
 -10  -1  -9    3.18    0.15
  -1   9  10    3.46    0.18
  -9  10   1    3.28    0.15
  -9  10   1    3.12    0.14
  -1  -9 -10    3.09    0.15
  -1  -9 -10    3.35    0.17
  -1  -9 -10    3.27    0.17
 -10  -1  -9    3.30    0.16
   9 -10   1    2.98    0.13
  10  -1   9    3.31    0.14
   9  10  -1    3.36    0.14
  10  -1   9    3.19    0.15
   1   9 -10    2.99    0.19
  -1   9  10    3.18    0.13
 -10  -1  -9    3.16    0.18
  10   1   9    2.95    0.14
   1  -9 -10    3.54    0.17
  10  -1  -9    2.90    0.18
  -9 -10   1    3.38    0.17
   1   9  10    3.06    0.17
 -10   1  -9    3.13    0.17
 -10   1  -9    3.16    0.17
 -10   1  -9    3.22    0.14
  10   1   9    3.26    0.17
   9 -10  -1    3.01    0.14
   9 -10  -1    3.27    0.17
  10  -1  -9    2.87    0.18
  -9 -10   1    3.07    0.17
  -9 -10   1    3.35    0.18
   9  10   1    3.33    0.18
   1  -9 -10    3.25    0.16
   1  -9 -10    3.43    0.16
 -10  -1   9    3.11    0.15
  -9  10  -1    3.02    0.18
  -1  -9  10    2.85    0.16
  -1   9 -10    3.22    0.15
  -1   9 -10    2.60    0.19
  10  -1  -9    2.98    0.14
   9  10   1    2.88    0.16
  -9  10  -1    3.21    0.15
  10   1   9    3.17    0.15
   1   9  10    3.21    0.14
 -10  -1   9    3.04    0.15
  10  -3   9    1.94    0.12
  10   3  -9    1.83    0.11
  10  -3   9    1.87    0.10
  -9  10   3    1.79    0.11
 -10  -3  -9    1.97    0.16
 -10  -3  -9    2.13    0.13
  -9  10   3    2.04    0.15
  10   3  -9    1.90    0.11
 -10   3   9    2.02    0.12
   9 -10   3    2.07    0.12
   3   9 -10    1.92    0.11
   3   9 -10    1.87    0.16
  -3   9  10    1.86    0.08
  -3   9  10    1.89    0.12
  -3   9  10    1.81    0.13
 -10   3   9    1.80    0.11
  -9 -10  -3    2.03    0.14
  -9 -10  -3    1.91    0.14
   9  10  -3    2.16    0.14
  10   3  -9    2.17    0.16
  -9  10   3    1.77    0.11
   3  -9  10    1.94    0.11
  -3  -9 -10    1.75    0.11
  -3  -9 -10    1.91    0.13
  -3  -9 -10    1.93    0.14
   9 -10   3    2.03    0.09
 -10  -3  -9    1.99    0.11
   9  10  -3    1.92    0.12
   3   9  10    1.71    0.12
   3   9  10    1.90    0.14
   9 -10  -3    2.01    0.11
   3  -9 -10    1.97    0.10
   3  -9 -10    2.03    0.13
   3  -9 -10    1.91    0.13
  10  -3  -9    2.01    0.15
  10   3   9    2.16    0.14
  10   3   9    1.95    0.11
 -10  -3   9    1.81    0.11
  -9 -10   3    2.02    0.15
  -9 -10   3    1.85    0.13
  -9  10  -3    1.98    0.15
  -9  10  -3    1.81    0.10
  10   3   9    1.84    0.11
  10  -3  -9    1.94    0.15
 -10  -3   9    1.88    0.12
 -10   3  -9    1.88    0.14
   9 -10  -3    1.85    0.12
  -3   9 -10    2.07    0.12
  10  -3  -9    1.95    0.10
  -3  -9  10    2.02    0.13
  -9 -10   3    1.98    0.12
  -3   9 -10    1.74    0.15
   9  10   3    2.16    0.14
   9  10   3    1.90    0.13
 -10   3  -9    1.91    0.13
  -5  -9 -10    1.72    0.13
  -9 -10  -5    1.83    0.14
  10  -5   9    1.72    0.09
   5  -9  10    1.64    0.11
   5   9 -10    1.66    0.11
  -9  10   5    1.88    0.12
  -9  10   5    1.76    0.12
  -5   9  10    1.56    0.11
  -5   9  10    1.89    0.13
  10   5  -9    1.73    0.11
  10   5  -9    1.57    0.14
  10   5  -9    1.81    0.10
   9 -10   5    1.88    0.12
  10  -5   9    1.91    0.12
   5  -9  10    1.76    0.11
  -5  -9 -10    1.87    0.10
  -5  -9 -10    1.80    0.14
   5   9 -10    1.60    0.15
 -10   5   9    1.78    0.11
  -9 -10  -5    1.81    0.15
 -10  -5  -9    2.01    0.10
 -10  -5  -9    1.93    0.16
 -10  -5  -9    1.83    0.13
 -10   5   9    1.82    0.12
   9 -10   5    1.81    0.09
   9  10  -5    1.70    0.13
   9  10  -5    1.74    0.13
   5  -9 -10    1.85    0.13
  -5  -9  10    1.80    0.08
  -5  -9  10    1.86    0.13
 -10  -5   9    1.66    0.10
  -9 -10   5    1.74    0.11
  -9 -10   5    1.86    0.14
  -9 -10   5    1.85    0.13
   5  -9 -10    1.76    0.13
   9 -10  -5    1.69    0.14
  10   5   9    1.93    0.14
 -10  -5   9    1.76    0.12
  -5   9 -10    1.46    0.15
 -10   5  -9    1.89    0.11
   9  10   5    1.73    0.14
   9  10   5    1.90    0.13
  10  -5  -9    1.69    0.09
  10  -5  -9    2.10    0.15
  10  -5  -9    1.62    0.15
  10   5   9    1.85    0.11
   5  -9 -10    1.64    0.11
  -9  10  -5    1.72    0.15
  -9  10  -5    1.82    0.10
 -10   5  -9    1.80    0.15
   5   9  10    1.95    0.13
   5   9  10    1.97    0.14
   9 -10  -5    1.70    0.09
   9 -10  -5    1.69    0.12
  10   5   9    1.87    0.12
 -10   7   9   10.33    0.39
  -9 -10  -7    9.90    0.42
  -9 -10  -7   10.50    0.41
  10  -7   9   10.44    0.36
 -10   7   9    9.87    0.39
 -10  -7  -9   10.83    0.39
 -10  -7  -9   10.55    0.43
 -10  -7  -9   10.41    0.41
  -9  10   7   10.01    0.39
  -9  10   7    9.93    0.39
  -7  -9 -10   10.12    0.41
  -7  -9 -10   10.45    0.43
  -7  -9 -10   10.62    0.41
   9 -10   7   10.22    0.39
   9 -10   7   10.23    0.37
  10  -7   9   10.46    0.40
   7   9 -10   10.25    0.39
  -7   9  10    9.96    0.39
  -7   9  10    9.77    0.40
  10   7  -9   10.31    0.37
   9  10  -7   10.18    0.40
   9  10  -7   10.06    0.41
   7  -9  10   10.55    0.39
   7  -9  10   10.20    0.38
  10   7  -9    9.79    0.39
   7   9 -10    9.77    0.43
  10   7  -9    9.59    0.42
   7   9  10   10.17    0.41
  -9 -10   7   10.06    0.37
   7   9  10    9.99    0.40
   9 -10  -7    9.68    0.41
  -7  -9  10    9.96    0.36
  -7  -9  10   10.63    0.40
   7  -9 -10    9.84    0.41
   7  -9 -10   10.62    0.40
   9  10   7    9.73    0.41
   9  10   7   10.57    0.41
  10  -7  -9   10.50    0.41
  10  -7  -9   10.19    0.43
  -7   9 -10   10.40    0.44
  -7   9 -10   10.29    0.39
   9 -10  -7   10.63    0.36
   9 -10  -7   10.36    0.40
   7  -9 -10   10.35    0.39
  10   7   9    9.86    0.41
  10   7   9   10.40    0.40
  -9 -10   7    9.72    0.40
  -9 -10   7    9.98    0.40
  -9  10  -7    9.57    0.43
  -9  10  -7   10.30    0.37
 -10  -7   9   10.22    0.38
 -10  -7   9   10.40    0.40
 -10   7  -9   10.80    0.43
 -10   7  -9    9.70    0.37
 -10  -9  -9    3.63    0.22
 -10  -9  -9    3.74    0.20
  10  -9   9    3.90    0.16
  10   9  -9    3.62    0.19
  10   9  -9    3.89    0.22
   9  10  -9    3.98    0.19
 -10   9   9    3.87    0.19
 -10   9   9    3.67    0.19
  -9 -10  -9    3.49    0.22
  -9 -10  -9    3.61    0.20
   9   9 -10    3.70    0.22
  10  -9   9    3.76    0.19
  -9  -9 -10    3.81    0.23
  -9  -9 -10    3.66    0.20
   9  10  -9    3.97    0.22
   9   9 -10    3.62    0.18
   9 -10   9    3.82    0.16
  -9  10   9    3.63    0.19
  -9   9  10    3.79    0.19
  -9   9  10    4.02    0.20
   9  -9  10    3.88    0.19
   9  -9  10    3.84    0.16
  -9  10   9    3.72    0.19
   9 -10   9    3.75    0.19
   9 -10  -9    4.17    0.20
   9 -10  -9    4.00    0.22
  -9   9 -10    3.87    0.16
  -9   9 -10    3.83    0.23
   9  -9 -10    4.10    0.20
   9  -9 -10    3.87    0.22
   9  -9 -10    3.50    0.19
  -9  10  -9    3.40    0.23
  -9  10  -9    3.48    0.15
  -9  -9  10    3.40    0.20
  -9 -10   9    3.85    0.16
   9   9  10    3.76    0.20
   9   9  10    3.41    0.20
 -10   9  -9    3.74    0.16
  -9  -9  10    3.51    0.16
   9  10   9    3.58    0.21
   9  10   9    3.94    0.21
  10  -9  -9    3.73    0.20
  10  -9  -9    3.41    0.22
  -9 -10   9    3.70    0.20
 -10  -9   9    3.64    0.17
 -10  -9   9    3.58    0.19
 -10   9  -9    3.78    0.23
  10   9   9    3.71    0.21
  10   9   9    3.61    0.20
 -10 -10   0    4.67    0.23
 -10 -10   0    4.94    0.24
 -10 -10   0    4.65    0.22
 -10   0 -10    4.55    0.22
 -10   0 -10    5.22    0.24
 -10   0 -10    4.78    0.20
 -10   0  10    4.52    0.20
 -10   0  10    4.37    0.20
 -10  10   0    4.41    0.24
 -10  10   0    4.53    0.20
   0 -10 -10    4.78    0.21
   0 -10 -10    4.99    0.22
   0 -10 -10    4.75    0.22
   0 -10  10    4.45    0.21
   0  10 -10    4.70    0.21
   0  10 -10    4.37    0.25
   0  10  10    5.03    0.19
   0  10  10    5.27    0.23
  10 -10   0    4.61    0.20
  10 -10   0    4.57    0.22
  10   0 -10    4.56    0.18
  10   0 -10    4.29    0.24
  10   0 -10    4.46    0.21
  10   0  10    4.89    0.21
  10   0  10    4.80    0.20
  10   0  10    4.92    0.20
  10  10   0    4.70    0.23
 -10 -10  -2   -0.09    0.06
 -10 -10  -2    0.08    0.06
  10  -2  10    0.03    0.03
  10   2 -10   -0.04    0.03
  10   2 -10   -0.07    0.07
 -10  -2 -10    0.08    0.05
 -10  -2 -10    0.02    0.07
 -10  -2 -10   -0.06    0.04
   2  10 -10    0.04    0.04
  10  10  -2   -0.10    0.05
  10  10  -2    0.01    0.04
  10  -2  10    0.04    0.05
 -10   2  10   -0.01    0.04
 -10   2  10   -0.02    0.04
  10 -10   2   -0.03    0.04
  10   2 -10   -0.02    0.04
 -10  10   2   -0.03    0.06
 -10  10   2    0.01    0.04
 -10  10   2    0.03    0.04
  -2 -10 -10    0.07    0.04
  -2 -10 -10    0.04    0.05
  -2 -10 -10   -0.03    0.04
   2  10 -10    0.01    0.07
   2 -10  10    0.02    0.05
  10 -10   2    0.00    0.03
  -2  10  10    0.02    0.02
  -2  10  10   -0.04    0.05
  -2  10  10    0.00    0.05
  -2  10 -10    0.09    0.08
   2 -10 -10    0.01    0.05
   2 -10 -10   -0.01    0.05
  -2  10 -10    0.04    0.04
 -10  -2  10   -0.03    0.03
  -2 -10  10    0.09    0.05
   2  10  10    0.02    0.04
   2  10  10    0.03    0.06
  10 -10  -2    0.03    0.03
  10 -10  -2    0.05    0.05
 -10  10  -2    0.04    0.06
   2 -10 -10    0.06    0.03
  10  -2 -10   -0.01    0.03
  10  -2 -10    0.05    0.07
  10  -2 -10    0.00    0.04
 -10   2 -10    0.01    0.05
 -10 -10   2    0.01    0.05
 -10 -10   2   -0.02    0.05
 -10 -10   2    0.05    0.05
 -10  10  -2   -0.03    0.03
  10   2  10   -0.05    0.05
  10   2  10   -0.05    0.03
  10   2  10   -0.02    0.03
 -10  -2  10    0.04    0.05
 -10   2 -10   -0.03    0.05
  10  10   2    0.09    0.06
  10  10   2    0.04    0.05
 -10 -10  -4   24.05    0.87
 -10 -10  -4   24.26    0.87
  10   4 -10   24.50    0.88
  10   4 -10   24.56    0.84
 -10  10   4   23.95    0.84
 -10  -4 -10   23.94    0.84
 -10  -4 -10   24.23    0.88
 -10  -4 -10   24.58    0.85
  10  10  -4   24.05    0.85
  10  -4  10   24.38    0.85
  10  -4  10   24.33    0.82
  10   4 -10   23.75    0.83
 -10   4  10   24.94    0.85
 -10   4  10   23.37    0.84
  10 -10   4   24.60    0.82
  -4  10  10   23.68    0.86
 -10  10   4   23.29    0.87
   4 -10  10   24.48    0.84
 -10  10   4   24.45    0.84
  -4 -10 -10   24.16    0.82
  -4 -10 -10   24.46    0.86
  -4 -10 -10   22.78    0.86
  10  10  -4   23.53    0.86
   4  10 -10   23.93    0.84
  10 -10   4   23.81    0.85
  -4  10  10   23.97    0.85
   4  10 -10   24.21    0.89
   4 -10 -10   24.49    0.83
  -4 -10  10   24.47    0.86
   4 -10 -10   23.44    0.85
 -10 -10   4   24.20    0.86
  -4  10 -10   24.56    0.85
 -10  10  -4   24.64    0.83
   4  10  10   24.31    0.85
   4  10  10   24.29    0.87
  10 -10  -4   24.21    0.83
   4 -10 -10   24.27    0.86
  -4  10 -10   23.35    0.89
 -10  10  -4   23.80    0.88
  10  -4 -10   23.50    0.87
  10  -4 -10   24.08    0.88
 -10  -4  10   24.59    0.85
 -10   4 -10   24.71    0.87
 -10   4 -10   24.26    0.85
 -10 -10   4   24.81    0.85
 -10 -10   4   24.41    0.87
  10   4  10   23.74    0.86
  10   4  10   24.56    0.83
  10   4  10   23.75    0.84
  10 -10  -4   24.79    0.86
 -10  -4  10   23.78    0.83
  10  10   4   23.01    0.87
  10  10   4   24.42    0.86
 -10 -10  -6   -0.03    0.07
 -10 -10  -6   -0.02    0.06
  10   6 -10   -0.05    0.04
   6 -10  10    0.02    0.05
  10 -10   6    0.05    0.05
 -10  -6 -10   -0.02    0.03
 -10  -6 -10    0.02    0.07
 -10  -6 -10   -0.05    0.05
  10  -6  10   -0.05    0.05
  10  -6  10   -0.09    0.03
  10   6 -10    0.05    0.04
  10   6 -10    0.14    0.08
 -10   6  10   -0.02    0.05
 -10   6  10    0.03    0.05
  10  10  -6    0.09    0.06
   6 -10  10   -0.03    0.04
 -10  10   6    0.05    0.05
 -10  10   6    0.07    0.05
  -6 -10 -10    0.08    0.07
  -6 -10 -10    0.07    0.06
  10 -10   6    0.01    0.03
   6  10 -10    0.02    0.04
  -6  10  10   -0.01    0.05
  -6  10  10   -0.01    0.05
  10  10  -6    0.04    0.06
   6  10 -10   -0.07    0.07
 -10  10  -6    0.03    0.07
 -10 -10   6   -0.04    0.06
 -10  10  -6   -0.01    0.03
  -6  10 -10    0.04    0.08
  -6 -10  10   -0.01    0.05
   6  10  10   -0.06    0.05
   6  10  10    0.02    0.06
  10 -10  -6    0.00    0.03
  10 -10  -6   -0.06    0.05
  10 -10  -6   -0.05    0.06
 -10 -10   6    0.05    0.06
   6 -10 -10   -0.03    0.05
  10  -6 -10   -0.01    0.07
  10  -6 -10   -0.04    0.07
 -10  -6  10   -0.03    0.03
 -10  -6  10    0.01    0.05
 -10   6 -10    0.04    0.06
 -10   6 -10    0.04    0.04
 -10 -10   6   -0.04    0.04
  10   6  10   -0.03    0.06
  10   6  10   -0.02    0.04
  10   6  10    0.02    0.05
   6 -10 -10    0.04    0.05
   6 -10 -10   -0.01    0.06
  10  10   6   -0.08    0.06
  10  10   6   -0.03    0.05
 -10 -10  -8    6.15    0.30
 -10 -10  -8    6.51    0.29
  10  10  -8    5.90    0.27
  10  10  -8    6.11    0.29
 -10  -8 -10    6.19    0.30
 -10  -8 -10    6.70    0.28
  10  -8  10    6.33    0.27
  10  -8  10    6.20    0.24
  10   8 -10    5.90    0.26
  10   8 -10    5.69    0.29
 -10   8  10    5.74    0.26
 -10   8  10    5.74    0.26
   8  10 -10    5.80    0.30
   8 -10  10    5.97    0.26
 -10  10   8    5.79    0.26
 -10  10   8    5.89    0.26
  -8 -10 -10    6.75    0.31
  -8 -10 -10    6.19    0.28
  10 -10   8    6.07    0.23
   8 -10  10    6.02    0.24
   8  10 -10    5.81    0.26
  -8  10  10    6.38    0.27
  -8  10  10    6.09    0.27
  10 -10   8    5.97    0.26
 -10  10  -8    5.80    0.31
   8 -10 -10    5.97    0.27
 -10  10  -8    6.05    0.24
  -8 -10  10    5.86    0.27
  -8  10 -10    5.70    0.30
  -8 -10  10    6.04    0.27
   8  10  10    6.36    0.28
   8  10  10    6.21    0.28
  10 -10  -8    6.02    0.27
  10 -10  -8    5.75    0.29
   8 -10 -10    6.11    0.27
   8 -10 -10    6.19    0.29
  10  -8 -10    6.09    0.28
  10  -8 -10    5.79    0.30
 -10  -8  10    5.94    0.24
 -10  -8  10    5.70    0.27
 -10   8 -10    6.46    0.31
 -10   8 -10    5.96    0.24
  10   8  10    6.21    0.28
  10   8  10    6.59    0.28
 -10 -10   8    6.23    0.24
 -10 -10   8    6.60    0.27
  10  10   8    5.85    0.28
  10  10   8    6.23    0.28
 -10 -10 -10   -0.02    0.07
 -10 -10 -10    0.09    0.06
  10 -10  10    0.00    0.04
  10  10 -10    0.03    0.05
  10  10 -10    0.15    0.08
 -10  10  10    0.01    0.05
 -10  10  10   -0.04    0.05
  10 -10  10   -0.01    0.05
  10 -10 -10    0.08    0.08
  10 -10 -10   -0.01    0.06
 -10 -10  10    0.05    0.04
 -10 -10  10   -0.12    0.06
 -10  10 -10    0.06    0.08
  10  10  10   -0.02    0.07
  10  10  10    0.07    0.06
   0  11   1   -0.04    0.04
   1   0 -11   -0.03    0.05
   1   0 -11    0.02    0.05
   1   0  11   -0.01    0.02
   1   0  11    0.06    0.04
  11  -1   0   -0.02    0.04
  11  -1   0    0.02    0.04
  11   1   0    0.02    0.05
  11   1   0   -0.02    0.04
   0  11  -1    0.01    0.03
   0  11  -1    0.03    0.04
   0  11  -1    0.03    0.04
   0  11   1    0.03    0.03
   0  11   1    0.01    0.03
   0 -11   1    0.01    0.04
  -1   0  11    0.02    0.04
   0 -11  -1   -0.01    0.03
   0 -11  -1   -0.04    0.04
   0 -11   1   -0.02    0.02
 -11  -1   0   -0.01    0.04
 -11  -1   0    0.08    0.02
 -11   1   0    0.01    0.04
 -11   1   0   -0.01    0.04
  -1   0 -11    0.07    0.06
  -1   0 -11    0.08    0.06
  -1   0 -11   -0.02    0.03
  -1   0  11    0.02    0.02
  -1   0  11    0.00    0.03
   3   0  11   -0.02    0.03
  11  -3   0   -0.02    0.03
  11  -3   0    0.07    0.04
  11   3   0   -0.04    0.05
   3   0  11    0.03    0.03
   0  11   3    0.04    0.03
   0  11   3    0.05    0.03
   0  11   3    0.03    0.05
   3   0 -11   -0.04    0.05
   3   0 -11    0.00    0.04
  -3   0 -11    0.02    0.04
  -3   0  11    0.02    0.02
  -3   0  11   -0.02    0.03
  -3   0  11    0.01    0.04
   0 -11  -3    0.02    0.03
   0 -11  -3    0.03    0.03
   0 -11   3    0.04    0.03
   0 -11   3    0.00    0.04
   0  11  -3    0.01    0.04
   0  11  -3    0.02    0.03
  11   3   0    0.07    0.05
  11   3   0   -0.03    0.03
   0 -11   3    0.05    0.04
  -3   0 -11    0.01    0.06
  -3   0 -11    0.01    0.05
 -11  -3   0    0.05    0.04
 -11  -3   0    0.07    0.04
 -11  -3   0    0.03    0.03
 -11   3   0   -0.03    0.04
 -11   3   0    0.03    0.04
 -11  -5   0    0.02    0.04
   5   0  11    0.02    0.03
  -5   0  11    0.01    0.04
   0 -11  -5    0.00    0.03
   0 -11   5    0.01    0.03
   0 -11   5    0.05    0.04
   0 -11   5    0.01    0.04
   0  11  -5    0.01    0.03
   0  11  -5    0.05    0.05
   0  11   5   -0.02    0.03
   5   0 -11   -0.01    0.04
  -5   0 -11   -0.08    0.04
 -11  -5   0   -0.02    0.04
   0  11   5    0.02    0.05
   5   0 -11    0.03    0.02
   5   0 -11    0.02    0.06
 -11   5   0   -0.02    0.05
  -5   0 -11   -0.01    0.05
   5   0  11    0.01    0.03
  11  -5   0    0.00    0.03
  11  -5   0    0.00    0.04
  11   5   0   -0.08    0.05
  11   5   0   -0.02    0.05
  11   5   0   -0.01    0.04
   0 -11  -5    0.06    0.03
   0 -11  -5    0.00    0.04
 -11  -5   0    0.06    0.04
  -5   0  11    0.04    0.03
 -11   5   0    0.07    0.04
   0  11  -7    0.09    0.06
  -7   0 -11   -0.05    0.06
  -7   0 -11    0.06    0.05
   0 -11  -7   -0.03    0.04
  -7   0  11    0.00    0.03
  11   7   0   -0.11    0.06
  11   7   0    0.03    0.04
 -11  -7   0    0.05    0.06
 -11  -7   0   -0.02    0.04
 -11   7   0    0.07    0.06
 -11   7   0    0.01    0.04
   0  11  -7    0.01    0.04
   7   0  11    0.00    0.03
  11  -7   0    0.03    0.04
  11  -7   0    0.00    0.05
  -7   0  11    0.05    0.04
   0 -11  -7    0.02    0.04
   0 -11  -7    0.04    0.04
   7   0 -11   -0.03    0.04
 -11  -7   0   -0.05    0.05
   0 -11   7   -0.06    0.04
   0  11   7   -0.02    0.05
   7   0 -11    0.00    0.02
   7   0 -11    0.02    0.07
   0  11   7    0.01    0.03
   7   0  11   -0.01    0.04
   0 -11   7   -0.01    0.03
  -9   0 -11   -0.03    0.04
  -9   0  11   -0.03    0.04
   0 -11  -9    0.01    0.04
  -9   0 -11   -0.03    0.04
   0 -11  -9   -0.04    0.04
   0 -11   9    0.03    0.05
 -11  -9   0   -0.04    0.05
 -11  -9   0   -0.01    0.04
 -11  -9   0   -0.02    0.06
   9   0 -11    0.02    0.02
   9   0 -11    0.02    0.04
   0 -11  -9    0.05    0.05
   9   0  11    0.05    0.04
   9   0  11   -0.03    0.04
 -11   9   0    0.00    0.04
   9   0 -11    0.20    0.08
  -9   0 -11    0.01    0.06
  11   9   0   -0.04    0.03
   0  11  -9    0.06    0.04
   0  11  -9   -0.07    0.06
   0  11   9    0.05    0.03
   0  11   9    0.01    0.06
  11  -9   0   -0.01    0.04
 -11   9   0    0.07    0.06
  -9   0  11    0.06    0.04
   9   0  11    0.00    0.05
  11  -9   0    0.04    0.02
  11   9   0   -0.08    0.06
  11  -9   0    0.07    0.05
   0   1 -11   -0.03    0.05
   0   1 -11    0.07    0.05
   1 -11   0    0.03    0.03
  11   0   1   -0.03    0.04
  -1  11   0    0.00    0.03
 -11   0   1    0.00    0.02
  -1 -11   0    0.00    0.04
   0  -1  11    0.03    0.04
  -1 -11   0    0.05    0.03
 -11   0  -1   -0.02    0.04
 -11   0  -1    0.05    0.04
   0   1  11   -0.03    0.02
   0   1  11    0.04    0.04
 -11   0  -1    0.03    0.02
 -11   0   1    0.01    0.04
   1  11   0    0.02    0.03
   1  11   0    0.04    0.03
   1  11   0    0.03    0.04
  11   0  -1   -0.03    0.04
  11   0  -1    0.03    0.05
  11   0  -1    0.03    0.04
   0  -1 -11   -0.06    0.05
  11   0   1    0.04    0.04
   0  -1 -11    0.05    0.05
   0  -1 -11    0.01    0.03
   0  -1  11    0.01    0.02
   0   1 -11   -0.01    0.03
  -1  11   0   -0.03    0.04
   1 -11   0    0.04    0.04
  -1  11   0    0.02    0.04
  -1 -11   0    0.03    0.02
 -11   2   1    3.74    0.18
  -1  11   2    3.77    0.16
  11  -2   1    3.60    0.17
  -1  11   2    3.68    0.16
  11  -2   1    3.45    0.17
   1  11  -2    3.67    0.17
  -2   1  11    3.61    0.16
  -1 -11  -2    3.89    0.18
   1 -11   2    3.87    0.17
   2  -1  11    3.71    0.16
   2   1 -11    3.62    0.20
   2   1 -11    3.98    0.19
  -1 -11  -2    3.81    0.16
   1 -11   2    3.79    0.15
   1 -11   2    3.88    0.17
  11   2  -1    3.67    0.18
  11   2  -1    3.60    0.18
 -11  -2  -1    3.81    0.18
 -11  -2  -1    3.90    0.17
 -11  -2  -1    3.75    0.15
   1  11  -2    3.61    0.17
  -2   1  11    3.69    0.14
   2  -1  11    3.79    0.15
  -1  11   2    3.50    0.18
  -1 -11  -2    3.98    0.15
 -11   2   1    3.83    0.17
  -2  -1 -11    3.64    0.19
  -2  -1 -11    3.49    0.17
 -11  -2  -1    3.73    0.17
  -2   1  11    3.58    0.17
  -1  11   2    3.77    0.16
  11   2  -1    3.89    0.17
 -11   2  -1    3.59    0.18
  -1 -11   2    3.62    0.16
  -2   1 -11    3.73    0.17
  -1 -11   2    3.42    0.17
  11  -2  -1    4.08    0.18
   2   1  11    3.56    0.16
  11  -2  -1    3.68    0.17
   2  -1 -11    3.45    0.18
  -1 -11   2    3.62    0.18
  -2  -1  11    3.84    0.14
 -11   2  -1    3.61    0.17
 -11  -2   1    3.67    0.17
   1  11   2    4.06    0.17
   1  11   2    3.92    0.16
  -1  11  -2    3.68    0.17
  -1  11  -2    3.83    0.18
  -2   1 -11    3.48    0.19
 -11  -2   1    3.95    0.15
  11   2   1    3.66    0.18
  11   2   1    3.99    0.18
  -2   1 -11    3.73    0.19
  -2  -1  11    4.07    0.17
   1  11   2    3.74    0.18
   2  -1 -11    3.65    0.19
   2   1  11    3.90    0.15
  -2  -1  11    3.80    0.15
 -11  -4  -1    0.34    0.06
   1 -11   4    0.40    0.06
   1 -11   4    0.42    0.06
  11   4  -1    0.48    0.06
 -11   4   1    0.39    0.06
  -4  -1 -11    0.39    0.07
  -4  -1 -11    0.37    0.07
  -1  11   4    0.49    0.07
   4  -1  11    0.41    0.05
   4   1 -11    0.60    0.07
  -1  11   4    0.50    0.05
  -1  11   4    0.41    0.06
  -1  11   4    0.41    0.05
 -11  -4  -1    0.33    0.06
 -11  -4  -1    0.38    0.05
   1 -11   4    0.47    0.04
  -4   1  11    0.55    0.06
   4  -1  11    0.52    0.06
   4   1 -11    0.53    0.04
   4   1 -11    0.41    0.08
   1  11  -4    0.56    0.06
  11   4  -1    0.40    0.07
  11  -4   1    0.53    0.06
  -1 -11  -4    0.42    0.04
  -1 -11  -4    0.41    0.05
  -1 -11  -4    0.33    0.05
 -11   4   1    0.54    0.08
  11   4  -1    0.37    0.07
   1  11  -4    0.58    0.07
  11  -4   1    0.54    0.07
  -4   1  11    0.45    0.06
  -4  -1  11    0.47    0.06
  -4  -1  11    0.45    0.05
  -4   1 -11    0.39    0.07
  -1 -11   4    0.48    0.06
  -1  11  -4    0.43    0.05
   4   1  11    0.33    0.05
   4   1  11    0.36    0.05
  -1 -11   4    0.53    0.06
   1 -11  -4    0.40    0.05
 -11  -4   1    0.39    0.06
 -11  -4   1    0.53    0.05
  -4   1 -11    0.38    0.07
   1  11   4    0.26    0.06
   4  -1 -11    0.47    0.08
  -1 -11   4    0.60    0.05
  11   4   1    0.41    0.07
  -1  11  -4    0.47    0.07
 -11   4  -1    0.57    0.06
  11   4   1    0.41    0.05
   1  11   4    0.32    0.05
 -11  -4   1    0.38    0.06
 -11   4  -1    0.37    0.07
   4  -1 -11    0.41    0.06
  11   4   1    0.43    0.07
  11  -4  -1    0.41    0.05
  11  -4  -1    0.40    0.06
 -11  -6  -1    5.21    0.24
   6  -1  11    5.71    0.22
   1 -11   6    5.26    0.22
 -11  -6  -1    5.25    0.23
   1  11  -6    5.78    0.26
   6   1 -11    5.69    0.24
  -6  -1 -11    4.99    0.25
  11   6  -1    5.84    0.22
  -1  11   6    5.79    0.22
   1  11  -6    5.61    0.23
  -6   1  11    5.47    0.23
  -1 -11  -6    5.43    0.21
  -1 -11  -6    5.19    0.22
  -1 -11  -6    5.37    0.23
   1 -11   6    5.31    0.23
  11  -6   1    5.53    0.24
  11   6  -1    5.83    0.25
 -11   6   1    5.35    0.25
 -11   6   1    5.80    0.23
  -6  -1 -11    5.15    0.24
   6   1 -11    5.66    0.26
   6  -1  11    5.45    0.22
   6   1 -11    5.71    0.20
  -1  11   6    5.69    0.25
  11  -6   1    5.65    0.23
  -6   1  11    5.69    0.22
 -11   6  -1    5.50    0.25
  -1 -11   6    5.40    0.23
   6  -1 -11    5.29    0.26
   1  11   6    5.45    0.22
 -11   6  -1    5.34    0.23
  11   6   1    5.15    0.21
  -6   1 -11    5.47    0.25
  -1 -11   6    5.59    0.24
  -6  -1  11    5.77    0.23
 -11  -6   1    5.80    0.23
  -6  -1  11    5.50    0.22
   1 -11  -6    5.93    0.22
   6   1  11    5.05    0.22
  -1  11  -6    5.40    0.25
   6  -1 -11    5.31    0.23
   1 -11  -6    5.82    0.23
  11   6   1    5.04    0.25
   1  11   6    5.10    0.24
  11  -6  -1    5.45    0.24
  -6   1 -11    5.64    0.25
  11  -6  -1    5.62    0.22
  -1  11  -6    5.57    0.23
   6   1  11    5.41    0.22
 -11  -6   1    5.60    0.25
 -11  -6   1    6.00    0.24
   8   1 -11    0.40    0.06
 -11  -8  -1    0.34    0.06
   8   1 -11    0.45    0.04
 -11   8   1    0.38    0.06
 -11   8   1    0.41    0.04
   1  11  -8    0.44    0.09
 -11  -8  -1    0.30    0.08
  11   8  -1    0.57    0.09
  -8   1  11    0.51    0.07
 -11   8   1    0.36    0.08
  -1 -11  -8    0.36    0.06
 -11  -8  -1    0.45    0.08
  11  -8   1    0.41    0.06
  11  -8   1    0.50    0.07
   1 -11   8    0.50    0.05
   1 -11   8    0.42    0.06
   1  11  -8    0.39    0.06
   8  -1  11    0.37    0.06
   8  -1  11    0.32    0.05
  -8  -1 -11    0.41    0.05
  -1  11   8    0.42    0.05
  11   8  -1    0.36    0.06
   8   1 -11    0.44    0.09
  -8  -1 -11    0.44    0.07
  -8  -1 -11    0.33    0.08
  -8   1  11    0.47    0.06
  -1  11   8    0.30    0.07
  -1 -11  -8    0.34    0.06
  -1 -11  -8    0.41    0.05
  -8   1 -11    0.41    0.07
  -8   1 -11    0.42    0.05
 -11   8  -1    0.42    0.08
   8   1  11    0.37    0.06
  -8   1 -11    0.22    0.07
  11   8   1    0.53    0.05
  -8  -1  11    0.42    0.07
  -1 -11   8    0.51    0.06
  -1 -11   8    0.51    0.07
  -1  11  -8    0.37    0.06
   1 -11  -8    0.34    0.06
  11  -8  -1    0.34    0.07
   1  11   8    0.38    0.05
   8   1  11    0.44    0.06
   8   1  11    0.33    0.05
  -8  -1  11    0.45    0.06
   1  11   8    0.37    0.08
   8  -1 -11    0.44    0.03
   8  -1 -11    0.35    0.08
   8  -1 -11    0.56    0.07
   1 -11  -8    0.38    0.04
  -1  11  -8    0.44    0.09
   1 -11  -8    0.30    0.06
  11   8   1    0.40    0.08
   1 -11  -8    0.31    0.06
  11  -8  -1    0.43    0.06
 -11  -8   1    0.46    0.08
 -11  -8   1    0.36    0.08
 -11  -8   1    0.29    0.06
 -11   8  -1    0.41    0.06
 -11  10   1    0.11    0.05
 -10  -1 -11    0.14    0.05
   1 -11  10    0.02    0.05
  10  -1  11    0.01    0.04
  -1  11  10    0.11    0.06
  -1 -11 -10    0.03    0.05
 -11 -10  -1    0.10    0.05
 -10  -1 -11    0.12    0.07
 -11 -10  -1    0.07    0.06
  11 -10   1    0.15    0.06
   1  11 -10    0.12    0.05
  10   1 -11    0.11    0.05
   1  11 -10    0.03    0.07
 -10   1  11   -0.05    0.04
  -1 -11 -10    0.04    0.05
  10   1 -11    0.16    0.09
  10  -1  11    0.09    0.06
 -11  10   1    0.12    0.07
  -1 -11 -10    0.06    0.06
  -1  11  10    0.09    0.03
  11 -10   1    0.04    0.03
  11 -10   1    0.07    0.04
  10  -1  11    0.11    0.04
  10   1 -11    0.09    0.03
 -11 -10  -1    0.13    0.07
 -10  -1 -11    0.10    0.06
 -11  10   1    0.13    0.04
 -10   1  11    0.08    0.05
  11  10  -1    0.03    0.06
 -10   1 -11    0.14    0.06
  10   1  11    0.08    0.04
 -10  -1  11    0.10    0.05
 -11 -10   1    0.03    0.05
 -11 -10   1    0.12    0.06
  -1  11 -10    0.04    0.08
 -11 -10   1    0.09    0.07
 -10  -1  11    0.06    0.04
   1 -11 -10    0.08    0.05
  10   1  11    0.08    0.04
  11 -10  -1    0.08    0.05
 -10   1 -11    0.07    0.04
   1  11  10    0.03    0.06
  10  -1 -11    0.18    0.03
  10  -1 -11    0.14    0.08
  11 -10  -1    0.13    0.05
  10   1  11    0.09    0.06
  -1 -11  10    0.09    0.05
  -1  11 -10    0.14    0.05
  11  10   1   -0.01    0.06
   1 -11 -10    0.14    0.05
   1  11  10    0.08    0.04
 -10   1 -11    0.09    0.07
   1 -11 -10    0.11    0.05
 -11  10  -1    0.04    0.04
 -11  10  -1    0.01    0.07
  10  -1 -11   -0.03    0.04
  -1   2  11    3.55    0.17
  -1   2  11    3.78    0.14
  -1  -2 -11    3.72    0.19
   2 -11   1    3.75    0.17
  -2  11   1    3.82    0.16
  -1   2  11    3.60    0.16
  -2 -11  -1    3.93    0.19
   1  -2  11    3.50    0.17
   1   2 -11    3.64    0.20
  -1  -2 -11    3.60    0.17
   1  -2  11    3.56    0.15
 -11  -1  -2    3.79    0.17
 -11  -1  -2    4.05    0.17
  11  -1   2    3.29    0.17
  11  -1   2    3.47    0.17
  11   1  -2    3.72    0.18
  11   1  -2    3.79    0.19
  -2  11   1    3.76    0.16
  -2 -11  -1    3.85    0.17
   1   2 -11    3.80    0.19
  -2  11   1    3.78    0.17
  11   1  -2    3.60    0.18
 -11  -1  -2    3.93    0.14
  -1  -2 -11    3.63    0.19
   2  11  -1    3.74    0.18
   2  11  -1    3.54    0.17
  -2  11   1    3.69    0.18
 -11  -1  -2    4.08    0.18
 -11   1   2    3.94    0.14
   1   2 -11    3.81    0.15
  -2 -11  -1    3.90    0.15
 -11   1   2    4.12    0.17
   2  11  -1    3.95    0.16
  -2  11  -1    4.03    0.17
  -1   2 -11    3.63    0.16
 -11  -1   2    3.78    0.15
  -2 -11   1    3.63    0.16
  11  -1  -2    3.73    0.18
   2  11   1    3.67    0.18
   1   2  11    3.88    0.17
  11  -1  -2    3.83    0.18
 -11  -1   2    3.42    0.17
  -1  -2  11    3.68    0.15
  -2  11  -1    3.89    0.18
   2  11   1    3.85    0.17
   2  11   1    3.91    0.15
  -2 -11   1    3.80    0.18
 -11   1  -2    3.56    0.17
  11   1   2    4.18    0.18
  -2  11  -1    3.88    0.15
  -2  11  -1    3.85    0.17
  -1  -2  11    3.97    0.17
   1  -2 -11    3.90    0.20
  -1   2 -11    3.48    0.20
  -1   2 -11    3.62    0.20
  -2 -11   1    3.85    0.14
  11  -1  -2    3.96    0.18
   1  -2 -11    3.67    0.18
  11   1   2    3.99    0.18
 -11   1  -2    3.58    0.17
   1   2  11    3.79    0.15
  -3  -2 -11    0.70    0.08
  -2 -11  -3    0.63    0.08
   2  11  -3    1.00    0.08
 -11   3   2    1.10    0.05
  -2 -11  -3    0.75    0.07
  11  -3   2    0.93    0.08
 -11  -3  -2    0.91    0.08
 -11  -3  -2    0.87    0.09
  11   3  -2    0.89    0.10
  -3  -2 -11    0.77    0.09
 -11  -3  -2    0.82    0.08
 -11  -3  -2    0.97    0.07
   3  -2  11    0.93    0.08
   3   2 -11    1.11    0.06
   3   2 -11    0.93    0.09
  -2  11   3    1.12    0.08
 -11   3   2    0.96    0.09
  -2  11   3    0.93    0.09
   2 -11   3    0.96    0.08
   2 -11   3    1.04    0.08
  11  -3   2    0.87    0.08
   3  -2  11    0.99    0.07
  11   3  -2    1.10    0.09
  -3   2  11    0.93    0.08
   3   2 -11    1.15    0.11
   2  11  -3    0.92    0.08
  11   3  -2    0.90    0.09
  -3  -2 -11    0.89    0.08
  -3   2  11    1.05    0.08
  -2  11   3    1.04    0.07
  -2  11   3    1.02    0.08
 -11   3   2    0.90    0.08
  -2 -11  -3    0.89    0.06
  -2 -11   3    1.03    0.08
   2  11   3    0.89    0.06
   3   2  11    0.85    0.07
  -3   2 -11    0.82    0.10
  -3  -2  11    1.20    0.09
  11  -3  -2    1.06    0.08
 -11  -3   2    1.00    0.07
  -2  11  -3    1.06    0.06
  -3  -2  11    1.06    0.07
   3  -2 -11    0.89    0.09
   3   2  11    1.00    0.08
   2  11   3    0.71    0.09
   3  -2 -11    0.97    0.10
 -11   3  -2    0.79    0.09
  -2  11  -3    0.91    0.08
  -2  11  -3    1.22    0.10
  11   3   2    0.87    0.08
  11  -3  -2    1.16    0.10
  -2 -11   3    0.99    0.09
  11   3   2    0.92    0.09
  -2 -11   3    1.15    0.09
 -11   3  -2    1.16    0.09
  -3   2 -11    1.03    0.09
 -11  -3   2    0.93    0.08
   2  11   3    0.82    0.08
   2  11  -5    2.80    0.14
  -2  11   5    2.95    0.14
   5   2 -11    2.97    0.12
   5   2 -11    2.98    0.18
   5   2 -11    2.93    0.15
   2 -11   5    2.79    0.11
  11  -5   2    2.78    0.14
   2 -11   5    2.78    0.14
  11   5  -2    2.95    0.16
   2 -11   5    2.78    0.13
  11  -5   2    2.97    0.15
  11   5  -2    2.94    0.14
 -11   5   2    2.54    0.16
  -5   2  11    2.76    0.14
  -5   2  11    2.55    0.14
 -11  -5  -2    2.66    0.15
  -2 -11  -5    2.49    0.13
  -2 -11  -5    2.58    0.14
 -11   5   2    3.05    0.14
   2  11  -5    2.80    0.16
  -2  11   5    2.79    0.13
  -2 -11  -5    2.86    0.12
   5  -2  11    2.78    0.13
  -5  -2 -11    2.80    0.15
  -5  -2 -11    2.72    0.16
  -2  11   5    2.76    0.16
 -11  -5  -2    2.63    0.16
   5  -2  11    2.79    0.13
 -11   5   2    2.91    0.11
  -2 -11   5    2.67    0.12
  11  -5  -2    2.91    0.14
   5  -2 -11    2.67    0.17
   2 -11  -5    3.27    0.14
   2  11   5    2.70    0.14
   2  11   5    2.76    0.16
  -2 -11   5    2.56    0.14
 -11  -5   2    2.88    0.15
 -11  -5   2    2.83    0.13
  11   5   2    2.81    0.17
  -5  -2  11    2.81    0.15
   2 -11  -5    2.74    0.13
  -5   2 -11    3.10    0.17
  11   5   2    2.84    0.13
   5  -2 -11    3.23    0.15
 -11   5  -2    2.71    0.14
   5   2  11    2.68    0.14
   5   2  11    2.60    0.14
 -11   5  -2    2.67    0.16
 -11  -5   2    3.07    0.15
  -2  11  -5    2.66    0.16
  -5  -2  11    2.91    0.13
  11  -5  -2    3.06    0.15
  -2 -11   5    2.76    0.15
  -2  11  -5    2.67    0.14
  -5   2 -11    2.70    0.15
  11   5   2    2.82    0.16
  11   5   2    2.79    0.13
   2 -11   7   13.82    0.49
   7  -2  11   14.10    0.51
 -11   7   2   12.86    0.50
  -2  11   7   14.09    0.53
   2  11  -7   14.09    0.51
   2  11  -7   13.92    0.54
  -2 -11  -7   14.30    0.51
   7  -2  11   14.53    0.50
  -7   2  11   13.51    0.51
   2 -11   7   13.44    0.51
   7   2 -11   13.71    0.51
  11  -7   2   14.05    0.51
   7   2 -11   13.57    0.48
   7   2 -11   13.79    0.55
 -11   7   2   13.89    0.48
  -7  -2 -11   14.65    0.52
 -11   7   2   13.12    0.53
  -2  11   7   14.44    0.49
  -2  11   7   14.90    0.52
  11   7  -2   14.02    0.53
  -2 -11  -7   14.36    0.49
 -11  -7  -2   14.30    0.54
 -11  -7  -2   13.77    0.53
  11   7  -2   14.17    0.51
  11  -7   2   14.59    0.52
  -2 -11  -7   13.19    0.52
  -7   2  11   14.01    0.51
  -7  -2 -11   13.72    0.53
 -11  -7   2   14.00    0.52
 -11  -7   2   14.38    0.51
   2  11   7   14.50    0.51
  -7  -2  11   13.50    0.50
  11  -7  -2   13.66    0.50
   7  -2 -11   13.75    0.51
 -11  -7   2   13.97    0.53
   7   2  11   14.50    0.51
   7   2  11   14.63    0.49
  -7   2 -11   13.86    0.53
  -7   2 -11   14.21    0.52
  -7  -2  11   13.34    0.51
   7  -2 -11   13.89    0.54
  11   7   2   14.01    0.51
  11   7   2   14.22    0.53
  11  -7  -2   13.75    0.52
  -2 -11   7   13.83    0.50
  -2 -11   7   13.86    0.52
  -2  11  -7   13.54    0.51
  -2  11  -7   13.01    0.54
   2 -11  -7   14.76    0.51
   2  11   7   14.12    0.53
   2 -11  -7   14.73    0.51
 -11   7  -2   14.53    0.51
 -11   7  -2   13.88    0.54
  11   7   2   14.04    0.49
   2 -11  -7   15.17    0.49
   7   2  11   14.15    0.51
   2  11  -9   -0.01    0.07
  11   9  -2    0.04    0.06
  11   9  -2   -0.01    0.05
  -9  -2 -11    0.04    0.06
  -2 -11  -9    0.06    0.05
  -9  -2 -11    0.04    0.05
   2 -11   9    0.04    0.05
   9   2 -11    0.01    0.07
  -2 -11  -9    0.08    0.04
  -2  11   9    0.02    0.05
  -9  -2 -11   -0.01    0.04
  11  -9   2    0.03    0.04
 -11   9   2    0.00    0.04
 -11   9   2    0.09    0.03
  -2  11   9    0.01    0.03
 -11  -9  -2    0.06    0.06
   9   2 -11    0.06    0.05
   2  11  -9   -0.01    0.04
 -11  -9  -2    0.07    0.07
  -9   2  11    0.03    0.04
  -9   2  11    0.04    0.05
   9  -2  11    0.09    0.05
  11  -9   2    0.04    0.05
  11  -9   2   -0.02    0.02
  -2  11   9    0.01    0.05
   9   2 -11   -0.02    0.03
   9  -2  11    0.06    0.04
  -2 -11  -9    0.05    0.05
 -11   9   2   -0.05    0.06
 -11  -9   2    0.00    0.06
  11   9   2   -0.03    0.06
  -9   2 -11    0.01    0.06
  -9  -2  11    0.01    0.04
 -11  -9   2    0.09    0.05
   9  -2 -11    0.06    0.07
   9  -2 -11    0.23    0.06
 -11  -9   2   -0.01    0.05
   2  11   9    0.03    0.06
   9   2  11    0.02    0.03
  -9   2 -11   -0.01    0.06
   9   2  11   -0.03    0.04
  11  -9  -2    0.06    0.04
   9   2  11    0.10    0.06
   2 -11  -9    0.07    0.04
 -11   9  -2    0.02    0.06
 -11   9  -2    0.00    0.04
   2 -11  -9    0.05    0.05
   2 -11  -9    0.09    0.05
  -9  -2  11    0.00    0.05
   2  11   9    0.08    0.04
  -2 -11   9    0.02    0.05
  -2  11  -9    0.00    0.04
  11  -9  -2    0.06    0.05
  11   9   2    0.00    0.05
  -2  11  -9    0.00    0.07
   0  -3 -11    0.03    0.05
  -3 -11   0    0.05    0.05
   3  11   0    0.01    0.04
   0  -3  11    0.01    0.02
  -3  11   0    0.00    0.04
  11   0  -3    0.06    0.05
   0  -3 -11    0.02    0.03
 -11   0  -3    0.06    0.05
 -11   0   3    0.03    0.04
   0   3  11   -0.04    0.03
   0  -3 -11    0.03    0.05
 -11   0   3    0.04    0.03
  -3 -11   0    0.01    0.02
  -3 -11   0   -0.08    0.04
   3  11   0   -0.02    0.04
  11   0  -3    0.00    0.05
   0   3  11   -0.02    0.03
   0   3 -11    0.01    0.05
  -3  11   0   -0.02    0.04
  -3  11   0    0.00    0.03
  11   0   3    0.00    0.05
   3  11   0    0.07    0.03
   0  -3  11    0.01    0.04
   0   3 -11    0.04    0.06
 -11   0  -3    0.06    0.04
  11   0   3    0.00    0.04
  11   0  -3    0.08    0.05
   0   3 -11    0.03    0.03
  -3  11   0    0.05    0.03
  -2   3  11    0.93    0.08
  11  -2   3    0.95    0.08
 -11  -2  -3    0.78    0.07
  11  -2   3    0.92    0.08
  -3  11   2    0.94    0.08
 -11   2   3    1.19    0.08
   3  11  -2    1.01    0.08
   3  11  -2    1.06    0.08
  -3 -11  -2    0.92    0.08
  -3  11   2    1.10    0.07
  11   2  -3    1.13    0.10
  -3  11   2    0.96    0.07
  -3  11   2    0.86    0.09
  -2  -3 -11    0.77    0.09
  11   2  -3    1.16    0.10
   2   3 -11    0.81    0.10
  -2  -3 -11    0.65    0.09
   2   3 -11    1.00    0.06
   3 -11   2    1.12    0.08
   2   3 -11    1.00    0.10
 -11  -2  -3    0.85    0.09
  -2   3  11    0.90    0.07
  11   2  -3    0.97    0.10
  -3 -11  -2    0.79    0.09
   3 -11   2    1.10    0.08
   2  -3  11    0.96    0.07
   2  -3  11    0.89    0.07
 -11   2   3    1.18    0.06
  -3 -11  -2    0.75    0.06
  -2  -3 -11    0.78    0.08
 -11  -2  -3    0.81    0.07
  -2  -3  11    1.09    0.06
 -11  -2   3    1.15    0.08
 -11  -2   3    1.03    0.07
 -11   2  -3    0.91    0.09
  11  -2  -3    0.93    0.09
  -3  11  -2    1.05    0.09
   2  -3 -11    0.90    0.09
  11  -2  -3    1.13    0.09
   3  11   2    0.94    0.06
  -3  11  -2    1.07    0.06
  11  -2  -3    0.98    0.09
  -3 -11   2    1.05    0.08
  11   2   3    0.88    0.06
   2   3  11    0.88    0.07
  -2   3 -11    1.06    0.10
  -2   3 -11    1.05    0.08
  11   2   3    0.76    0.09
  11   2   3    0.95    0.08
  -2  -3  11    1.20    0.09
  -3 -11   2    1.00    0.09
  -3  11  -2    1.14    0.08
   2  -3 -11    1.14    0.10
   2   3  11    0.75    0.07
  -3 -11   2    0.97    0.09
   3  11   2    0.77    0.09
 -11   2  -3    0.88    0.08
   3  11   2    0.93    0.08
  -3  11   4    1.75    0.12
  -3  11   4    1.85    0.10
  11  -4   3    2.13    0.12
  -4  -3 -11    1.74    0.12
  -3 -11  -4    1.97    0.10
  -4   3  11    2.11    0.11
  -4  -3 -11    1.74    0.14
   3  11  -4    1.82    0.12
 -11   4   3    2.11    0.12
 -11   4   3    2.16    0.09
  -3 -11  -4    2.02    0.13
   3  11  -4    1.83    0.12
 -11  -4  -3    2.15    0.14
 -11  -4  -3    1.97    0.13
  11   4  -3    1.65    0.13
  -3  11   4    1.68    0.11
  -4  -3 -11    1.83    0.13
   3 -11   4    2.20    0.11
   4   3 -11    2.20    0.13
  -3  11   4    1.74    0.12
   3 -11   4    2.18    0.11
  -4   3  11    1.99    0.12
  -3 -11  -4    2.09    0.09
  11   4  -3    1.73    0.12
  11  -4   3    1.83    0.11
   4  -3  11    1.86    0.10
   4  -3  11    2.01    0.11
  -3 -11  -4    1.89    0.12
   4   3 -11    2.11    0.16
 -11  -4  -3    2.09    0.11
   4   3 -11    2.17    0.09
  -3 -11   4    1.93    0.12
   4   3  11    2.01    0.11
  11   4   3    1.99    0.14
  -3 -11   4    2.01    0.10
  11  -4  -3    2.27    0.14
  11   4   3    1.96    0.13
 -11   4  -3    1.74    0.11
  -3 -11   4    2.00    0.12
  -3  11  -4    2.29    0.09
  -4  -3  11    2.08    0.12
  -4   3 -11    1.69    0.14
  -4   3 -11    1.72    0.12
  11  -4  -3    2.01    0.14
 -11  -4   3    1.91    0.10
  11   4   3    2.07    0.11
 -11  -4   3    1.70    0.11
 -11   4  -3    1.81    0.13
   3  11   4    1.99    0.12
   3  11   4    2.04    0.13
  -3  11  -4    2.18    0.14
   4   3  11    1.89    0.11
  11  -4  -3    1.96    0.11
   4  -3 -11    2.04    0.13
   4  -3 -11    2.10    0.14
  -3  11  -4    2.15    0.11
  -4  -3  11    2.25    0.10
   3 -11   6   10.58    0.37
  -3  11   6   10.48    0.37
  -3 -11  -6   10.41    0.40
 -11   6   3   10.80    0.39
 -11   6   3   10.91    0.42
  -6  -3 -11   10.12    0.39
   6  -3  11   10.54    0.38
  11   6  -3   11.19    0.39
  11  -6   3    9.80    0.38
   6  -3  11   10.61    0.38
   6   3 -11   10.55    0.37
   3 -11   6   10.44    0.38
   3  11  -6   10.13    0.39
   6   3 -11   10.87    0.39
  -6  -3 -11   10.38    0.41
 -11  -6  -3    9.76    0.40
  11   6  -3   10.75    0.40
 -11   6   3   10.83    0.37
  -3  11   6   10.43    0.39
   3  11  -6    9.56    0.40
  11  -6   3    9.66    0.39
 -11  -6  -3    9.83    0.41
  -3  11   6   10.36    0.40
  -6   3  11    9.52    0.39
   6   3 -11   10.16    0.42
  -3 -11  -6   10.45    0.36
  -6   3  11    9.82    0.38
  -3 -11  -6   10.25    0.38
  11   6   3   10.00    0.36
  -6  -3  11   10.56    0.39
 -11   6  -3    9.79    0.38
   6   3  11   10.06    0.38
  -6  -3  11   10.80    0.37
 -11   6  -3    9.17    0.41
 -11  -6   3   10.53    0.39
  -3 -11   6   10.14    0.35
  11  -6  -3   10.16    0.40
   6   3  11   10.48    0.36
  11   6   3   10.05    0.38
  -3 -11   6    9.44    0.38
  -3  11  -6   10.51    0.42
 -11  -6   3   10.67    0.40
 -11  -6   3   10.44    0.38
  -3 -11   6   10.11    0.39
  -3  11  -6   10.73    0.39
  -6   3 -11   11.21    0.42
  11  -6  -3   10.15    0.38
   3 -11  -6   10.38    0.38
  11   6   3   10.12    0.41
  11   6   3    9.55    0.39
  -3  11  -6   10.62    0.35
   6  -3 -11    9.89    0.39
   3  11   6   10.50    0.39
   3  11   6   10.20    0.41
   6  -3 -11    9.59    0.41
   6   3  11   10.56    0.39
  -6   3 -11   10.29    0.39
   3 -11  -6   10.40    0.39
 -11   8   3    0.22    0.05
  11  -8   3    0.20    0.06
 -11  -8  -3    0.36    0.08
  -3  11   8    0.17    0.06
  -3  11   8    0.29    0.04
  -8   3  11    0.26    0.05
  -8  -3 -11    0.29    0.05
  -3 -11  -8    0.34    0.05
  11  -8   3    0.27    0.05
  -8  -3 -11    0.45    0.08
   8   3 -11    0.35    0.06
   3  11  -8    0.27    0.06
   8   3 -11    0.29    0.04
  11   8  -3    0.24    0.07
  11   8  -3    0.28    0.06
   8  -3  11    0.17    0.05
   8  -3  11    0.28    0.05
   8   3 -11    0.25    0.09
   3 -11   8    0.24    0.05
 -11   8   3    0.36    0.08
   3 -11   8    0.24    0.04
   3  11  -8    0.27    0.08
  -3  11   8    0.18    0.05
 -11   8   3    0.32    0.05
  -8   3  11    0.29    0.06
  -3 -11  -8    0.30    0.07
  -3 -11  -8    0.25    0.06
 -11  -8  -3    0.26    0.07
  -8  -3 -11    0.31    0.06
  -3 -11   8    0.19    0.06
  11  -8  -3    0.29    0.05
   3 -11  -8    0.17    0.05
   8  -3 -11    0.28    0.06
 -11  -8   3    0.19    0.06
  11  -8  -3    0.31    0.07
  -3 -11   8    0.19    0.05
  -8   3 -11    0.20    0.06
 -11   8  -3    0.20    0.07
  -8  -3  11    0.31    0.06
   8   3  11    0.34    0.06
  11   8   3    0.31    0.06
   3  11   8    0.29    0.07
   8  -3 -11    0.23    0.08
  -8  -3  11    0.32    0.05
 -11  -8   3    0.29    0.07
 -11  -8   3    0.30    0.06
  11   8   3    0.30    0.08
   8   3  11    0.30    0.04
  -3  11  -8    0.32    0.06
   3 -11  -8    0.18    0.04
   3 -11  -8    0.27    0.06
   8   3  11    0.31    0.07
  -8   3 -11    0.20    0.07
   3  11   8    0.37    0.06
  -3  11  -8    0.23    0.08
 -11   8  -3    0.23    0.05
 -11 -10  -3    3.35    0.20
 -10  -3 -11    3.40    0.20
  11  10  -3    3.31    0.16
 -11 -10  -3    3.39    0.20
 -10   3  11    3.25    0.17
 -11  10   3    3.29    0.15
  11 -10   3    3.47    0.17
  -3 -11 -10    3.46    0.15
 -10  -3 -11    3.56    0.17
  11  10  -3    3.28    0.19
  -3 -11 -10    3.45    0.18
  -3 -11 -10    3.52    0.19
  10   3 -11    3.50    0.17
 -11  10   3    2.74    0.19
 -11  10   3    3.26    0.16
  10  -3  11    3.33    0.17
  10   3 -11    3.36    0.15
 -10  -3 -11    3.54    0.17
  -3  11  10    3.22    0.19
   3  11 -10    3.41    0.17
   3  11 -10    3.43    0.22
  -3  11  10    3.30    0.18
  10   3 -11    3.42    0.21
  10  -3  11    3.52    0.15
 -10   3  11    3.32    0.17
   3 -11  10    3.48    0.17
 -11 -10   3    3.52    0.18
  11 -10  -3    3.34    0.16
 -11 -10   3    3.51    0.20
   3 -11 -10    3.62    0.18
   3 -11 -10    3.57    0.15
   3  11  10    3.53    0.19
   3 -11 -10    3.41    0.18
  10   3  11    3.42    0.15
  11  10   3    3.25    0.20
  11  10   3    3.41    0.18
 -10   3 -11    3.51    0.18
 -11  10  -3    3.27    0.20
 -11  10  -3    3.68    0.16
  11 -10  -3    3.61    0.19
 -11 -10   3    3.18    0.17
  10  -3 -11    3.29    0.21
  10  -3 -11    3.26    0.17
  -3  11 -10    3.41    0.17
 -10  -3  11    2.96    0.17
 -10   3 -11    3.36    0.19
 -10  -3  11    3.18    0.16
  10   3  11    3.49    0.17
  10   3  11    3.02    0.18
   3  11  10    3.29    0.17
  -3  11 -10    3.44    0.22
  -3 -11  10    3.25    0.18
  -1  -4 -11    0.35    0.06
  -4 -11  -1    0.40    0.07
   1  -4  11    0.52    0.06
 -11   1   4    0.44    0.04
 -11  -1  -4    0.40    0.06
   1   4 -11    0.43    0.07
  -4 -11  -1    0.31    0.06
  -4  11   1    0.46    0.07
  -4  11   1    0.51    0.05
  -4  11   1    0.58    0.07
  -1  -4 -11    0.35    0.06
  -1  -4 -11    0.41    0.07
   1  -4  11    0.56    0.05
  -4  11   1    0.49    0.05
  -1   4  11    0.49    0.04
   4  11  -1    0.41    0.06
 -11  -1  -4    0.45    0.06
 -11   1   4    0.49    0.06
  11  -1   4    0.38    0.06
   1   4 -11    0.40    0.08
  11   1  -4    0.60    0.07
  11  -1   4    0.44    0.06
  11   1  -4    0.52    0.07
  -1   4  11    0.46    0.06
   4  11  -1    0.50    0.05
  -4 -11  -1    0.37    0.04
 -11  -1  -4    0.47    0.07
   1   4 -11    0.48    0.05
  11   1  -4    0.47    0.08
  -1   4  11    0.47    0.06
   1   4 -11    0.60    0.05
  -4 -11   1    0.46    0.07
 -11  -1   4    0.37    0.06
 -11   1  -4    0.51    0.07
  -1  -4  11    0.51    0.06
  11  -1  -4    0.51    0.07
   4  11   1    0.50    0.04
  -4  11  -1    0.36    0.05
  11   1   4    0.43    0.06
   4  11   1    0.35    0.06
  -1   4 -11    0.53    0.06
  -1   4 -11    0.51    0.09
  -4  11  -1    0.52    0.07
   1   4  11    0.37    0.05
 -11   1  -4    0.48    0.06
  -4 -11   1    0.53    0.07
  -4 -11   1    0.42    0.06
  11  -1  -4    0.37    0.07
   4  11   1    0.34    0.06
   1  -4 -11    0.36    0.07
   1  -4 -11    0.42    0.07
 -11  -1   4    0.53    0.05
   1   4  11    0.32    0.06
  11   1   4    0.37    0.04
  11  -1  -4    0.44    0.06
  11   1   4    0.36    0.06
  -4  11  -1    0.43    0.06
  -4  11  -1    0.47    0.05
  -3  -4 -11    1.94    0.12
  11   3  -4    1.99    0.13
  -4  11   3    2.08    0.12
  -4  11   3    1.95    0.10
  11  -3   4    1.82    0.11
  -4  11   3    1.87    0.10
  11   3  -4    1.84    0.13
  -3  -4 -11    1.84    0.14
  -3  -4 -11    2.00    0.12
 -11  -3  -4    2.00    0.12
   3   4 -11    2.14    0.10
 -11   3   4    2.31    0.12
 -11  -3  -4    1.83    0.14
  -4 -11  -3    2.04    0.10
   3   4 -11    2.08    0.15
   3   4 -11    1.90    0.13
 -11  -3  -4    1.74    0.10
  -4 -11  -3    1.97    0.13
  -3   4  11    1.76    0.11
  -3   4  11    1.77    0.12
   4  11  -3    1.90    0.12
  11   3  -4    1.98    0.14
   3  -4  11    2.03    0.10
  11  -3   4    1.61    0.12
   4 -11   3    2.25    0.11
  -4 -11  -3    2.20    0.14
   3  -4  11    2.02    0.11
 -11   3   4    2.38    0.10
  -4  11   3    2.08    0.13
   4  11  -3    1.56    0.11
   4 -11   3    2.16    0.11
 -11  -3   4    2.02    0.12
  -3   4 -11    2.08    0.14
  -4  11  -3    2.10    0.14
  -4  11  -3    2.34    0.10
  -4 -11   3    1.66    0.12
  11   3   4    2.01    0.13
   3  -4 -11    1.97    0.14
   4  11   3    1.91    0.12
  11  -3  -4    2.24    0.14
   3  -4 -11    1.85    0.13
  -3  -4  11    2.29    0.12
  11   3   4    2.11    0.11
  11  -3  -4    2.41    0.12
  11  -3  -4    2.15    0.14
   3   4  11    1.99    0.11
 -11   3  -4    1.88    0.13
 -11  -3   4    2.05    0.10
  -3   4 -11    2.08    0.11
  -4 -11   3    1.96    0.13
  -4  11  -3    2.15    0.11
  11   3   4    1.90    0.12
 -11   3  -4    1.90    0.12
  -3  -4  11    2.21    0.09
  -4 -11   3    1.98    0.11
   3   4  11    2.03    0.12
 -11  -5  -4    0.03    0.06
 -11  -5  -4   -0.02    0.04
  -4 -11  -5   -0.02    0.03
   4  11  -5    0.01    0.04
   4  11  -5   -0.06    0.05
  -5   4  11    0.00    0.04
 -11   5   4   -0.03    0.04
  11   5  -4    0.01    0.05
  11   5  -4    0.02    0.05
   4 -11   5    0.01    0.03
  11  -5   4    0.05    0.04
   4 -11   5    0.02    0.04
 -11   5   4   -0.01    0.03
  -5  -4 -11    0.00    0.04
  -5  -4 -11   -0.03    0.06
   5   4 -11    0.00    0.05
  -4  11   5   -0.01    0.03
  -4  11   5    0.10    0.04
  -4  11   5    0.01    0.05
 -11  -5  -4    0.04    0.03
  -5   4  11    0.05    0.04
  -4 -11  -5   -0.01    0.04
  11  -5   4    0.01    0.04
   5  -4  11    0.01    0.03
   5   4 -11   -0.01    0.07
   5  -4  11   -0.01    0.03
   5   4 -11    0.02    0.03
  -4 -11  -5    0.00    0.05
  -5  -4 -11   -0.08    0.05
  -4  11  -5    0.01    0.02
  -5  -4  11   -0.04    0.04
  -5   4 -11   -0.02    0.05
 -11  -5   4    0.04    0.04
  11  -5  -4    0.02    0.06
   4  11   5    0.03    0.05
 -11  -5   4    0.00    0.03
   5  -4 -11    0.02    0.04
  -5  -4  11    0.01    0.03
  -4 -11   5    0.01    0.03
  -4 -11   5    0.03    0.05
   5  -4 -11   -0.05    0.05
  -4  11  -5    0.02    0.03
   5   4  11   -0.03    0.04
  11  -5  -4   -0.04    0.03
  11  -5  -4    0.04    0.05
  11   5   4   -0.06    0.05
  -4 -11   5   -0.08    0.04
 -11   5  -4    0.03    0.04
   5   4  11    0.07    0.05
   4  11   5    0.02    0.04
   4 -11  -5    0.07    0.05
  11   5   4    0.00    0.04
   5   4  11   -0.01    0.02
 -11   5  -4    0.04    0.05
  11   5   4    0.03    0.06
  -4  11  -5    0.11    0.06
  -5   4 -11    0.01    0.04
 -11   7   4    0.39    0.05
  -4  11   7    0.14    0.05
 -11   7   4    0.35    0.06
 -11  -7  -4    0.25    0.07
  11   7  -4    0.27    0.06
   7   4 -11    0.31    0.06
   4  11  -7    0.24    0.06
   7  -4  11    0.26    0.04
  11   7  -4    0.23    0.06
  -7  -4 -11    0.26    0.05
 -11  -7  -4    0.32    0.07
  -4  11   7    0.26    0.04
   4  11  -7    0.21    0.07
  11  -7   4    0.18    0.05
  -4 -11  -7    0.35    0.06
   4 -11   7    0.37    0.04
  -4 -11  -7    0.21    0.06
  -7   4  11    0.29    0.05
   4 -11   7    0.35    0.05
  -7   4  11    0.23    0.05
  -7  -4 -11    0.28    0.08
  11  -7   4    0.24    0.05
   7   4 -11    0.31    0.04
  -4  11   7    0.28    0.07
   7  -4  11    0.26    0.05
   7   4 -11    0.27    0.09
   4  11   7    0.29    0.06
  -7  -4  11    0.32    0.04
 -11   7  -4    0.18    0.05
   7  -4 -11    0.27    0.06
   4  11   7    0.27    0.07
   7   4  11    0.35    0.04
   4 -11  -7    0.33    0.05
 -11  -7   4    0.14    0.06
   4 -11  -7    0.23    0.06
   4 -11  -7    0.25    0.05
  -7  -4  11    0.40    0.06
  -4 -11   7    0.27    0.06
  -4  11  -7    0.37    0.06
  -4  11  -7    0.27    0.08
  -4  11  -7    0.35    0.03
 -11  -7   4    0.25    0.06
   7   4  11    0.36    0.07
  -7   4 -11    0.29    0.08
  -7   4 -11    0.21    0.05
  -4 -11   7    0.21    0.03
  -4 -11   7    0.30    0.06
  11   7   4    0.33    0.04
  11   7   4    0.27    0.06
 -11  -7   4    0.28    0.06
   7   4  11    0.29    0.06
  11  -7  -4    0.30    0.05
  11  -7  -4    0.25    0.06
  11  -7  -4    0.25    0.07
 -11   7  -4    0.09    0.07
  11   7   4    0.20    0.07
   7  -4 -11    0.19    0.08
 -11  -9  -4    0.12    0.07
   9   4 -11    0.04    0.03
  -9   4  11    0.00    0.04
  -4 -11  -9    0.13    0.06
   9   4 -11    0.08    0.08
  -4  11   9    0.11    0.03
  -4  11   9    0.10    0.06
  11   9  -4    0.11    0.06
 -11   9   4    0.14    0.08
 -11   9   4    0.08    0.05
 -11   9   4    0.10    0.05
  -9  -4 -11    0.16    0.05
  -9  -4 -11    0.10    0.07
  -9  -4 -11    0.15    0.05
  -4  11   9    0.04    0.05
   9  -4  11    0.07    0.04
   4 -11   9    0.15    0.05
 -11  -9  -4    0.18    0.07
  -9   4  11    0.09    0.05
  -4 -11  -9    0.14    0.06
   9  -4  11    0.04    0.05
  -4 -11  -9    0.15    0.04
   9   4 -11    0.09    0.05
  11  -9   4    0.07    0.05
  11   9  -4    0.06    0.06
   4  11  -9   -0.02    0.04
   4  11  -9    0.17    0.08
  11   9   4    0.17    0.06
  -9  -4  11    0.05    0.05
   4 -11  -9    0.12    0.04
  -9  -4  11    0.17    0.04
 -11   9  -4    0.06    0.07
  -4 -11   9    0.07    0.05
  -9   4 -11    0.07    0.05
  -4  11  -9    0.02    0.07
 -11  -9   4    0.06    0.05
 -11   9  -4    0.05    0.04
  11   9   4    0.13    0.07
   4  11   9    0.10    0.05
   4  11   9    0.12    0.07
   9  -4 -11    0.06    0.07
   9   4  11    0.09    0.05
  11  -9  -4    0.06    0.04
  -4  11  -9    0.07    0.05
   9   4  11    0.08    0.06
   9   4  11    0.09    0.04
  11  -9  -4   -0.03    0.05
 -11  -9   4    0.10    0.05
  -9   4 -11    0.09    0.07
 -11  -9   4    0.02    0.06
   9  -4 -11    0.02    0.07
   9  -4 -11    0.15    0.05
   4 -11  -9    0.00    0.05
   4 -11  -9    0.06    0.05
 -11   0   5    0.02    0.04
   0  -5 -11   -0.02    0.04
  -5 -11   0   -0.02    0.05
  -5  11   0    0.03    0.03
  11   0  -5   -0.02    0.05
  -5  11   0    0.04    0.05
   0   5 -11    0.04    0.06
  11   0   5    0.04    0.03
 -11   0  -5    0.05    0.05
   0  -5  11   -0.04    0.03
   0   5 -11    0.01    0.03
  11   0  -5    0.14    0.06
 -11   0  -5    0.04    0.04
  11   0   5   -0.01    0.04
   5  11   0   -0.03    0.04
   5  11   0    0.03    0.03
   5  11   0    0.07    0.05
  -5  11   0    0.06    0.04
  -5  11   0    0.01    0.03
   0  -5 -11    0.09    0.05
   0  -5 -11    0.06    0.05
   0   5 -11    0.01    0.03
   0   5  11    0.06    0.03
   0   5  11    0.01    0.04
 -11   0   5   -0.01    0.03
  11   0   5    0.02    0.04
  11   0  -5    0.07    0.05
 -11   0  -5    0.06    0.03
  -5 -11   0   -0.01    0.05
  -2  -5 -11    2.60    0.16
   2   5 -11    2.70    0.16
  -5  11   2    2.68    0.15
  -5  11   2    2.75    0.13
  11  -2   5    2.76    0.14
   2  -5  11    2.62    0.13
  11   2  -5    2.81    0.15
   5  11  -2    2.72    0.15
  -2  -5 -11    2.54    0.14
  11   2  -5    2.68    0.17
  11   2  -5    2.53    0.15
  -5  11   2    2.70    0.14
 -11  -2  -5    2.88    0.14
 -11  -2  -5    2.97    0.16
   5 -11   2    2.67    0.13
   2  -5  11    2.84    0.14
   5  11  -2    2.99    0.14
  -5 -11  -2    2.77    0.16
  -2  -5 -11    2.54    0.14
  -5  11   2    2.59    0.13
 -11   2   5    2.72    0.12
   2   5 -11    2.95    0.13
   2   5 -11    2.62    0.17
  -2   5  11    2.89    0.14
  -2   5  11    2.63    0.14
  11  -2   5    2.89    0.15
  -5 -11  -2    2.92    0.16
 -11  -2  -5    2.75    0.14
  -5 -11  -2    2.79    0.12
 -11   2   5    2.65    0.14
 -11   2  -5    2.69    0.15
   2   5  11    2.76    0.13
  -5  11  -2    2.88    0.12
   5  11   2    2.76    0.16
 -11  -2   5    2.78    0.14
  -5  11  -2    2.72    0.16
  11   2   5    2.85    0.15
  11   2   5    3.00    0.14
   2  -5 -11    3.20    0.16
  -2   5 -11    2.58    0.12
 -11  -2   5    2.83    0.13
  -5 -11   2    2.87    0.14
  11  -2  -5    2.78    0.16
   2   5  11    2.65    0.15
   5  11   2    2.94    0.15
  -5  11  -2    2.61    0.13
  11  -2  -5    2.64    0.16
 -11   2  -5    2.75    0.14
  -2  -5  11    2.70    0.11
  11   2   5    2.80    0.13
  -5 -11   2    3.01    0.16
  -2  -5  11    3.12    0.15
  -5 -11   2    2.79    0.16
  -2   5 -11    2.57    0.17
  11  -2  -5    2.65    0.14
 -11  -4  -5    0.12    0.06
  -5  11   4    0.03    0.05
 -11  -4  -5   -0.02    0.04
  -5  11   4   -0.02    0.03
  11  -4   5    0.02    0.04
  -5  11   4   -0.01    0.03
 -11  -4  -5    0.01    0.03
  -5  11   4   -0.01    0.04
  -4  -5 -11   -0.07    0.04
  11  -4   5    0.09    0.04
  -4  -5 -11    0.05    0.05
   5 -11   4    0.03    0.03
  -5 -11  -4   -0.03    0.03
   4   5 -11   -0.01    0.03
   4   5 -11    0.02    0.07
  -4   5  11    0.02    0.04
   5 -11   4   -0.04    0.03
  11   4  -5   -0.02    0.05
  -4  -5 -11    0.00    0.06
   4  -5  11    0.02    0.03
   4  -5  11    0.10    0.04
   4   5 -11    0.08    0.05
 -11   4   5    0.04    0.04
  11   4  -5    0.10    0.05
  -4   5  11   -0.04    0.04
   5  11  -4    0.00    0.05
 -11   4   5    0.03    0.03
  -5 -11  -4    0.00    0.05
  -5 -11  -4    0.00    0.05
   5  11  -4    0.01    0.04
  11   4   5    0.03    0.06
  -5  11  -4    0.00    0.02
  -4  -5  11   -0.02    0.02
 -11   4  -5   -0.03    0.04
  11   4   5    0.10    0.05
   4  -5 -11    0.06    0.06
 -11  -4   5    0.02    0.03
  -5  11  -4   -0.01    0.04
  -4   5 -11    0.06    0.06
 -11  -4   5   -0.04    0.03
   4   5  11    0.02    0.04
   4   5  11    0.00    0.04
 -11   4  -5   -0.09    0.04
   5  11   4    0.04    0.05
  -5  11  -4   -0.06    0.05
  -5 -11   4    0.04    0.04
  11   4   5   -0.02    0.03
  11  -4  -5   -0.04    0.05
  11  -4  -5    0.00    0.05
   4  -5 -11    0.05    0.05
  -5 -11   4    0.04    0.04
  -5 -11   4   -0.06    0.05
  -4  -5  11   -0.03    0.04
   5  11   4    0.01    0.05
  -4   5 -11   -0.05    0.03
  11  -4  -5    0.01    0.04
 -11  -6  -5   13.71    0.52
  -6  -5 -11   13.96    0.52
  11   6  -5   12.81    0.50
  11   6  -5   13.59    0.50
  -6   5  11   13.55    0.49
  -5 -11  -6   14.00    0.49
  -5  11   6   13.44    0.50
  -5  11   6   13.38    0.49
  11  -6   5   13.04    0.49
   5 -11   6   13.21    0.48
 -11  -6  -5   13.82    0.47
 -11   6   5   13.31    0.49
 -11   6   5   13.70    0.48
  -6  -5 -11   13.13    0.48
 -11  -6  -5   13.18    0.51
   6  -5  11   13.42    0.49
  -6   5  11   13.49    0.49
   6   5 -11   13.41    0.47
   5  11  -6   13.52    0.50
  -5 -11  -6   13.48    0.51
   6   5 -11   13.48    0.49
   6  -5  11   13.16    0.48
   5 -11   6   13.40    0.46
  -5 -11  -6   13.54    0.51
  -5  11   6   13.13    0.47
   5  11  -6   13.65    0.51
   6   5 -11   12.66    0.52
  11  -6   5   13.36    0.50
  -5  11  -6   12.90    0.52
  11   6   5   14.21    0.50
  -5  11  -6   13.39    0.49
  -5 -11   6   13.31    0.50
   6  -5 -11   13.54    0.50
  -6   5 -11   13.13    0.52
   6   5  11   13.85    0.49
   6   5  11   13.47    0.50
  11  -6  -5   13.55    0.48
  11  -6  -5   13.23    0.51
   5 -11  -6   13.24    0.48
  -5  11  -6   13.38    0.46
  11   6   5   14.01    0.52
 -11   6  -5   13.40    0.52
   5  11   6   13.84    0.50
  -6  -5  11   13.17    0.47
   6  -5 -11   13.61    0.52
  -6   5 -11   13.14    0.48
 -11  -6   5   13.61    0.49
  -5 -11   6   13.04    0.50
  -5 -11   6   13.66    0.47
  -6  -5  11   12.66    0.49
 -11  -6   5   13.38    0.49
  11  -6  -5   12.93    0.52
 -11   6  -5   13.33    0.48
  11   6   5   13.70    0.49
   5  11   6   13.47    0.51
   5 -11  -6   13.88    0.50
 -11   8   5    1.31    0.09
 -11  -8  -5    0.90    0.11
 -11  -8  -5    1.04    0.11
  -8  -5 -11    1.12    0.10
   5 -11   8    1.18    0.09
   8  -5  11    1.37    0.08
   5  11  -8    0.97    0.09
   8   5 -11    1.15    0.08
  -5  11   8    1.20    0.07
  -5  11   8    0.94    0.09
  -5  11   8    1.09    0.10
   5  11  -8    1.09    0.12
 -11   8   5    1.05    0.09
  11   8  -5    1.28    0.11
  -8  -5 -11    0.90    0.12
   8  -5  11    1.23    0.10
   8   5 -11    1.20    0.13
   8   5 -11    1.26    0.10
  -8  -5 -11    1.17    0.09
  -8   5  11    1.07    0.09
  -8   5  11    1.12    0.10
  11  -8   5    1.07    0.09
  11  -8   5    1.16    0.08
  11   8  -5    1.04    0.10
  -5 -11  -8    0.86    0.10
  -5 -11  -8    1.28    0.11
   8  -5 -11    1.02    0.12
  -5  11  -8    1.25    0.10
   8   5  11    1.06    0.10
  11  -8  -5    1.16    0.08
 -11  -8   5    1.20    0.11
   5 -11  -8    1.18    0.09
   5 -11  -8    1.07    0.10
   8  -5 -11    1.04    0.10
  11   8   5    1.03    0.10
  -5 -11   8    1.23    0.06
  -5 -11   8    1.29    0.10
  11  -8  -5    1.14    0.12
  -5  11  -8    0.97    0.12
 -11   8  -5    1.18    0.09
   8   5  11    1.16    0.07
  -8  -5  11    1.18    0.08
   8   5  11    1.01    0.10
  11  -8  -5    1.10    0.11
  -8  -5  11    1.15    0.10
  -8   5 -11    1.05    0.09
 -11  -8   5    1.26    0.10
   5  11   8    1.17    0.11
   5 -11  -8    0.99    0.09
   5  11   8    0.92    0.10
 -11   8  -5    1.06    0.12
  -8   5 -11    1.12    0.12
  -5 -11   8    1.18    0.11
 -11  -8   5    1.19    0.10
  11   8   5    1.05    0.11
   8  -5 -11    1.17    0.11
 -11  10   5    0.23    0.06
  10  -5  11    0.21    0.06
  -5 -11 -10    0.29    0.08
  10   5 -11    0.29    0.05
  -5  11  10    0.23    0.07
  11  10  -5    0.27    0.07
  10  -5  11    0.32    0.05
  10   5 -11    0.36    0.06
   5 -11  10    0.28    0.06
   5  11 -10    0.34    0.06
 -10  -5 -11    0.46    0.10
 -10  -5 -11    0.32    0.05
  -5 -11 -10    0.34    0.08
  10   5 -11    0.35    0.10
 -11  10   5    0.26    0.06
 -11 -10  -5    0.31    0.09
 -10   5  11    0.31    0.06
 -10   5  11    0.26    0.06
 -10  -5 -11    0.39    0.07
  -5  11  10    0.27    0.06
   5  11 -10    0.28    0.09
 -11 -10  -5    0.47    0.08
  11  10  -5    0.23    0.07
  11 -10   5    0.39    0.07
 -10  -5  11    0.34    0.07
  10  -5 -11    0.40    0.09
  11 -10  -5    0.33    0.07
   5 -11 -10    0.26    0.06
  11 -10  -5    0.37    0.09
 -11  10  -5    0.33    0.05
   5  11  10    0.41    0.07
   5  11  10    0.36    0.08
  10   5  11    0.28    0.07
  11 -10  -5    0.27    0.05
 -11 -10   5    0.40    0.07
 -11 -10   5    0.26    0.06
   5 -11 -10    0.35    0.08
  11  10   5    0.45    0.08
  -5 -11  10    0.34    0.08
  10  -5 -11    0.19    0.09
 -11  10  -5    0.27    0.08
  10   5  11    0.36    0.07
  -5  11 -10    0.43    0.10
 -10  -5  11    0.39    0.06
 -10   5 -11    0.22    0.06
 -10   5 -11    0.27    0.08
  10  -5 -11    0.21    0.06
 -11 -10   5    0.37    0.08
  11  10   5    0.39    0.09
   5 -11 -10    0.32    0.07
   6  11  -1    6.07    0.25
 -11  -1  -6    5.74    0.23
  11  -1   6    5.70    0.24
  -6 -11  -1    5.08    0.24
 -11   1   6    5.34    0.21
  -6 -11  -1    5.27    0.25
  11  -1   6    5.77    0.23
   6  11  -1    5.99    0.21
   1   6 -11    5.73    0.20
   1   6 -11    5.50    0.27
  11  -1   6    5.85    0.21
  11   1  -6    5.54    0.23
  11   1  -6    5.52    0.26
  11   1  -6    5.73    0.25
  -6  11   1    5.54    0.25
  -6  11   1    5.47    0.22
   1   6 -11    5.68    0.22
  -1  -6 -11    5.28    0.23
 -11   1   6    5.56    0.23
  -1   6  11    5.52    0.24
  -6  11   1    5.58    0.23
  -1  -6 -11    5.55    0.24
  -1  -6 -11    5.07    0.24
  -6  11   1    5.62    0.22
 -11  -1  -6    5.32    0.25
   1  -6  11    5.43    0.23
  -1   6  11    5.76    0.20
 -11  -1  -6    5.34    0.23
  -1   6 -11    5.58    0.22
  11  -1  -6    5.46    0.25
  11   1   6    5.07    0.23
  -1  -6  11    5.68    0.24
  11   1   6    5.52    0.24
 -11  -1   6    5.75    0.22
   6  11   1    5.31    0.24
 -11   1  -6    5.55    0.24
 -11   1  -6    5.78    0.24
 -11   1  -6    5.55    0.21
  -6  11  -1    5.60    0.23
  -6  11  -1    5.55    0.25
   1   6  11    5.46    0.22
   1   6  11    5.38    0.24
  -6 -11   1    5.61    0.24
  -1   6 -11    5.39    0.26
  11  -1  -6    5.65    0.23
  -6  11  -1    5.20    0.21
   6  11   1    4.97    0.24
   1  -6 -11    5.79    0.25
  11  -1  -6    5.49    0.25
  11   1   6    5.28    0.21
  -6 -11   1    6.18    0.25
  -6 -11   1    5.63    0.25
 -11  -1   6    5.65    0.23
   1  -6 -11    5.82    0.25
   6  11  -3   10.33    0.40
  -6 -11  -3   10.22    0.41
 -11   3   6   10.67    0.37
   6 -11   3   10.66    0.37
  -6  11   3    9.73    0.37
 -11  -3  -6    9.86    0.41
 -11  -3  -6   10.38    0.39
  -3  -6 -11    9.93    0.38
   3   6 -11   10.74    0.37
   6  11  -3   10.93    0.38
  -3   6  11   10.54    0.39
  -6  11   3    9.63    0.38
  11  -3   6   10.78    0.39
 -11   3   6   10.92    0.39
  11   3  -6    9.52    0.39
  -6  11   3    9.60    0.40
  -6  11   3    9.67    0.39
 -11  -3  -6   10.13    0.38
  11  -3   6   10.78    0.35
[truncated: 2,196,590 more chars]
